# Supplementary material for: Long Term Effectiveness on Prescribing of Two Multifaceted Educational Interventions: Results of Two Large Scale Randomized Cluster Trials
Source: PLoS One. 2014 Oct 17;9(10):e109915. doi: 10.1371/journal.pone.0109915 (PMC4201458; doi:10.1371/journal.pone.0109915)
Supplement: Table S3 — Primary data for the TEA trial. (XLSX) [file pone.0109915.s003.xlsx]

## Sheet: 0 year
topic	dda12aa20	dda11cc04	ddg04ca02	ddc02ca04	ddg04cb01	dda11cc01	dda12aa04	ddg03xc01	ddg04cb02	ddg04ca01	dda11cc05	dda11cc06	ddm05bx03	dda11cc02	ddm05ba04	ddm05ba06	dda11cc03	ddg04ca03	ddm05ba07	dda12aa20_post	dda11cc04_post	ddg04ca02_post	ddc02ca04_post	ddg04cb01_post	dda11cc01_post	dda12aa04_post	ddg03xc01_post	ddg04cb02_post	ddg04ca01_post	dda11cc05_post	dda11cc06_post	ddm05bx03_post	dda11cc02_post	ddm05ba04_post	ddm05ba06_post	dda11cc03_post	ddg04ca03_post	ddm05ba07_post	assisted popn	assisted population	district code	lha code
OSTEO	0	0	0	0	0	0	0	0	0	0	0	0	0	0	0	0	0	0	0	0	0	0	0	0	0	0	0	0	0	0	0	0	0	0	0	0	0	0	914	>500	3	1
IPB	0	0	0	0	0	0	0	0	0	0	0	0	0	0	0	0	0	0	0	0	0	0	0	0	0	0	0	0	0	0	0	0	0	0	0	0	0	0	437	300-500	1	1
OSTEO	0	0	0	0	0	0	0	0	0	0	0	0	0	0	0	0	0	0	0	0	0	0	0	0	0	0	0	0	0	0	0	0	0	0	0	0	0	0	0	<300	13	1
OSTEO	0	0	0	0	0	0	0	0	0	0	0	0	0	0	0	0	0	0	0	0	0	0	0	0	0	0	0	0	0	0	0	0	0	0	0	0	0	0	9	<300	5	2
OSTEO	0	0	0	0	0	0	0	0	0	0	0	0	0	0	0	0	0	0	0	0	0	0	0	0	0	0	0	0	0	0	0	0	0	0	0	0	0	0	0	<300	5	2
OSTEO	0	0	0	0	0	0	0	0	0	0	0	0	0	0	0	0	0	0	0	0	0	0	0	0	0	0	0	0	0	0	0	0	0	0	0	0	0	0	2	<300	5	2
OSTEO	0	0	0	0	0	0	0	0	0	0	0	0	0	0	0	0	0	0	0	0	0	0	0	0	0	0	0	0	0	0	0	0	0	0	0	0	0	0	0	<300	5	2
IPB	0	0	0	0	0	0	0	0	0	0	0	0	0	0	0	0	0	0	0	0	0	0	0	0	0	0	0	0	0	0	0	0	0	0	0	0	0	0	4	<300	5	2
OSTEO	0	0	0	0	0	0	0	0	0	0	0	0	0	0	0	0	0	0	0	0	0	0	0	0	0	0	0	0	0	0	0	0	0	0	0	0	0	0	52	<300	5	2
OSTEO	0	0	0	0	0	0	0	0	0	0	0	0	0	0	0	0	0	0	0	0	0	0	0	0	0	0	0	0	0	0	0	0	0	0	0	0	0	0	1	<300	5	2
OSTEO	0	0	0	0	0	0	0	0	0	0	0	0	0	0	0	0	0	0	0	0	0	0	0	0	0	0	0	0	0	0	0	0	0	0	0	0	0	0	1229	>500	10	3
OSTEO	0	0	0	0	0	0	0	0	0	0	0	0	0	0	0	0	0	0	0	0	0	0	0	0	0	0	0	0	0	0	0	0	0	0	0	0	0	0	32	<300	2	3
OSTEO	0	0	0	0	0	0	0	0	0	0	0	0	0	0	0	0	0	0	0	0	0	0	0	0	0	0	0	0	0	0	0	0	0	0	0	0	0	0	1	<300	16	3
OSTEO	0	0	0	0	0	0	0	0	0	0	0	0	0	0	0	0	0	0	0	0	0	0	0	0	0	0	0	0	0	0	0	0	0	0	0	0	0	0	1	<300	8	3
OSTEO	0	0	0	0	0	0	0	0	0	0	0	0	0	0	0	0	0	0	0	0	0	0	0	0	0	0	0	0	0	0	0	0	0	0	0	0	0	0	1298	>500	18	4
OSTEO	0	0	0	0	0	0	0	0	0	0	0	0	0	0	0	0	0	0	0	0	0	0	0	0	0	0	0	0	0	0	0	0	0	0	0	0	0	0	1027	>500	20	4
OSTEO	0	0	0	0	0	0	0	0	0	0	0	0	0	0	0	0	0	0	0	0	0	0	0	0	0	0	0	0	0	0	0	0	0	0	0	0	0	0	1568	>500	14	4
IPB	0	0	0	0	0	0	0	0	0	0	0	0	0	0	0	0	0	0	0	0	0	0	0	0	0	0	0	0	0	0	0	0	0	0	0	0	0	0	1489	>500	14	4
IPB	0	0	0	0	0	0	0	0	0	0	0	0	0	0	0	0	0	0	0	0	0	0	0	0	0	0	0	0	0	0	0	0	0	0	0	0	0	0	1505	>500	14	4
OSTEO	0	0	0	0	0	0	0	0	0	0	0	0	0	0	0	0	0	0	0	0	0	0	0	0	0	0	0	0	0	0	0	0	0	0	0	0	0	0	1577	>500	14	4
IPB	0	0	0	0	0	0	0	0	0	0	0	0	0	0	0	0	0	0	0	0	0	0	0	0	0	0	0	0	0	0	0	0	0	0	0	0	0	0	1284	>500	20	4
IPB	0	0.5468	23.9137	8.89472	4.8119	0	2.18723	0	1.74978	2.9163	1.09361	0.08748	7.34908	0	8.98221	0.87489	0	3.38291	4.08282	0	0	0	0	0	0	0	0	0	0	0	0	0	0	0	0	0	0	0	1143	>500	5	2
IPB	0.65789	1.64474	5.70175	2.46711	5.92105	0	0	0.61403	0.65789	1.97368	0.60307	0.03289	1.53509	0.16447	12.5877	0	1.39803	3.99123	3.37719	0	0.76754	4.67836	1.60819	2.46711	0	0.36549	0.76754	1.64474	1.02339	0.38377	0.02192	1.43275	0	7.47076	1.20614	0.9046	2.15643	2.55848	1520	>500	5	2
IPB	1.58856	1.78713	12.7085	15.6209	4.76569	0	0.33095	0	3.17712	3.17712	0.52952	0	0	0	16.3092	0	2.77998	6.48663	2.22399	0.26476	1.72094	7.94281	9.00185	4.16998	0	0.11031	0	2.51522	3.53014	0.30888	0	0.12355	0	11.1199	0.26476	0.79428	5.36581	3.08887	1259	>500	5	2
IPB	0	0.49148	12.6693	6.98995	3.44037	0	1.91131	0	7.20839	5.24246	0.32765	0.13106	0.61162	0	11.6208	0	3.49498	2.92704	2.44648	0	0.84643	11.0674	4.31411	2.94889	0	1.09218	0	3.38576	5.67934	0.45507	0.07645	1.22324	0	7.54332	0	1.65647	2.71589	1.1213	1526	>500	5	2
IPB	0	3.24324	17.6577	6.66667	5.67568	0	0.9009	0	2.7027	3.6036	0.04504	0.05405	0	0	5.04505	0	0.72072	3.67568	2.01802	0	1.35135	9.96997	8.25826	4.23423	0	1.2012	0	2.7027	3.12312	0.09009	0	0	0	5.38138	0.36036	0.78078	3.29129	1.34535	925	>500	5	2
IPB	27.3973	3.42466	173.516	91.3242	34.2466	0	34.2466	0	27.3973	54.7945	11.9863	0.68493	25.5708	0	108.676	27.3973	13.6986	12.7854	38.3562	9.13242	6.84932	237.443	171.233	52.5114	0	41.8569	0	50.2283	54.7945	5.32725	0.68493	112.938	0	136.377	43.379	15.9817	58.9041	42.618	73	<300	5	2
IPB	0	1.46542	19.1481	4.29855	33.9977	0	0	0	5.86166	7.42478	0.29308	0	9.8476	0	19.6952	2.34467	1.7585	3.36069	3.28253	0	0.87924	13.6772	4.6242	16.8034	0	0.32564	0	2.34467	3.64726	0.13025	0	6.74743	0	10.9418	2.34467	1.17233	1.38075	2.55308	853	>500	5	2
IPB	0	2.23214	11.9048	2.23214	8.92857	0	0	0	3.57143	4.7619	0.29761	0	0.83333	0	11.6667	10.7143	3.57143	3.57143	0.83333	0	1.19048	7.93651	1.14087	4.53869	0	0.49603	0	3.27381	3.1746	0.33482	0	0	0	11.1111	6.54762	0.89285	3.34325	1.38889	1120	>500	5	2
IPB	0	0	0	0	0	0	0	0	0	0	0	0	0	0	0	0	0	0	0	0	0	0	0	0	0	0	0	0	0	0	0	0	0	0	0	0	0	0	1589	>500	5	2
IPB	0	1.35135	18.7387	18.1982	4.32432	0	0	0	3.24324	4.32432	0	0.1081	2.01802	0	9.08108	0	5.40541	1.00901	3.02703	0	0.81081	14.8949	13.0631	3.96396	0	0.3003	0	2.52252	6.24625	0.21021	0.05405	1.00901	0	8.24024	0	1.08108	1.8979	3.02703	925	>500	1	1
IPB	3.88802	2.72162	14.5153	13.5433	9.33126	1.03681	1.94401	0.72576	2.72162	13.4785	0.0648	0.11664	0.36288	0	6.53188	0	0.1944	9.43494	1.45153	1.81441	1.32841	12.4417	10.0657	6.99844	0.1728	0.864	0.48384	3.75842	11.2321	0.0432	0.0648	0.84672	0.2592	3.50786	0.5184	0.0648	7.62053	1.08865	1286	>500	1	1
IPB	2.10822	0.52705	10.0726	5.73905	7.37878	0	2.34247	0	2.81096	7.61302	0	0	0	0.35137	3.27946	1.40548	0	3.93535	0	0	0.55633	11.8685	4.23596	8.66714	0	2.24487	0	2.34247	7.14453	0.05856	0	0	0	5.68439	1.87398	0	3.6074	0.98383	1423	>500	1	1
OSTEO	4.44444	2.06349	14.1799	22.5926	3.1746	0	2.38095	0	1.5873	5.07937	0.31746	0.57142	3.85185	0.31746	10.963	1.26984	0.31746	2.87831	7.7037	2.75132	1.69312	8.95944	14.1623	2.80423	0	0.5291	0	1.5873	3.38624	0.14109	0.35449	1.87654	0.31746	3.45679	1.5873	0.10582	2.20811	5.1358	1575	>500	3	1
IPB	0	0	0	0	0	0	0	0	0	0	0	0	0	0	0	0	0	0	0	0	0	0	13.5135	0	0	0	0	0	0	0	0	0	0	8.40841	0	0	0	0	37	<300	13	1
OSTEO	0	0.39506	4.63548	3.37126	5.37295	0	0	0	2.21239	15.1707	0.18436	0	0.29498	0	1.62242	0	0.15802	3.70839	2.0649	1.89633	1.00084	6.25088	3.79267	4.79351	0	0.79013	0	2.73915	11.5185	0.06145	0.01053	0.19665	0.05267	4.91642	0	0.48286	3.66625	3.14651	1582	>500	3	1
IPB	0	0	0	2.73723	11.8613	0	4.56204	0	0	0	0	0.18248	1.70316	0	3.40633	0	0	2.6764	6.81265	1.21655	0	0.81103	2.12895	8.51582	0	0	0	3.64964	0	0.05068	0	0	0	4.54177	0	0	2.43309	2.27088	274	<300	1	1
IPB	0.63532	1.42948	14.1889	10.0593	1.58831	0	5.02965	0	2.22363	8.89454	0.5559	0.17471	1.18594	0	10.0805	0	2.32952	5.52732	2.66836	2.11775	0.47649	10.5887	9.00042	2.70013	0	2.20599	0	1.05887	6.63561	0.23824	0.14294	0.69179	0	3.95313	0	0.5559	5.24495	3.55781	1574	>500	1	1
IPB	0.90334	2.71003	16.5613	23.1858	11.5176	0	0	0	6.77507	13.249	0	0.45167	0	0	5.05872	0	0.22583	3.55315	6.74496	0	0.6775	14.6542	15.8838	5.64589	0	0.25092	0	5.2695	7.62822	0.05018	0.15055	0	0	3.513	0	0.82806	1.63605	1.82676	1107	>500	1	1
IPB	3.89105	2.75616	10.3761	15.8344	8.26848	0	2.43191	3.63165	2.59403	19.4552	0.40531	0.08106	6.05275	0	7.86857	0	0.81063	8.90618	6.05275	1.29702	2.05361	6.55714	10.9346	5.67445	0	2.16169	0.80703	1.83744	13.4746	0.17113	0.05944	3.42989	0.05404	6.55714	0	0.27021	5.65643	4.43868	1542	>500	1	1
OSTEO	2.65487	2.10177	17.6991	27.2124	9.51327	0	1.10619	0	6.19469	12.9794	0.29498	0.04424	0	0	0.82595	0	0.58997	10.9439	2.0649	2.0649	1.21681	11.2094	17.1091	7.9646	0	1.47493	0	4.27729	9.63618	0.31956	0.01474	0.13765	0	1.3766	0	0	7.09931	1.23894	1130	>500	12	1
IPB	1.27226	2.8626	9.1179	9.17091	5.24809	0	2.12044	1.18745	1.9084	8.05768	0.34457	0.0318	0.59372	0	9.20271	0	0.63613	2.12044	9.49958	0.84817	1.32528	5.58383	3.74611	4.50594	0.14136	1.14857	0.79163	3.28668	6.36132	0.37107	0.0424	0.59372	0.10602	6.82782	0.21204	0.15903	2.16285	5.54142	1572	>500	1	1
IPB	8.92857	1.27551	12.3299	14.5089	5.10204	0	0	0	1.59439	13.6054	0.26573	0.12755	2.38095	0	6.25	0	1.4881	5.90986	0	0.42517	0.79719	10.0624	7.77707	3.08248	0	1.41723	0	2.44473	8.36168	0.37202	0.0372	2.28175	0	5.55556	0	0.31887	3.38719	0.19841	1568	>500	11	1
OSTEO	0	0.59808	26.3158	12.1611	10.7655	0	0	0	0	17.5439	0.59808	0.0598	12.2807	0	10.0479	0	0.59808	0	2.23285	0	0.99681	24.9867	11.4965	10.3668	0	1.99362	0.74428	2.79107	14.8857	0.06645	0.03987	14.1414	0	4.83785	0	0.59808	4.09357	3.72142	418	300-500	1	1
OSTEO	0	2.43056	9.9537	47.1643	9.89583	0	0.5787	0	5.55556	12.963	0.02893	0.03472	0	0	1.62037	1.04167	0	5	2.59259	0	0.86805	7.94753	31.7901	5.55556	0	0.09645	0	4.05093	8.95062	0.07716	0.09837	0.43209	0	1.51235	0.46296	0	2.59259	1.94444	1440	>500	11	1
OSTEO	3.82044	0.9551	23.5594	8.11843	5.2531	0	0.79592	1.78287	3.82044	6.04903	0.23877	0.04775	0	0	4.45718	0	1.23368	4.26616	6.24005	3.1837	1.43266	10.9307	8.33068	4.37759	0	0.2653	0.89143	2.0694	7.00414	0.07959	0.04775	0	0	4.30861	0	6.68577	1.78287	3.2686	1047	>500	1	1
IPB	0	0	7.13967	14.3909	4.68541	0	3.34672	0	2.67738	8.92459	0	0	0	0	9.99554	2.67738	0	11.4235	0	3.12361	0.22311	2.0824	8.3668	2.23115	0	0.74371	0	0.89245	4.75978	0.11155	0	0	0.44622	6.03897	0.89245	0	7.60077	0	747	>500	12	1
OSTEO	2.55319	0.31914	8.51064	25.7447	8.08511	0	2.83688	0	1.70213	13.0496	0.07092	0.04255	7.14894	0.21276	9.53191	0	5.95745	9.58865	1.98582	1.13475	0.07092	8.22695	16.0756	2.12766	0	0.47281	0	2.69504	9.26714	0.08274	0.02836	1.85343	0.07092	2.51537	0	0	5.20095	2.51537	1175	>500	1	1
OSTEO	0	1.00134	13.3511	12.6836	8.01068	0	0	0	1.33511	8.01068	0.05562	0	0	0	7.47664	0	0	1.24611	0.62305	0	0.55629	12.6836	8.7895	6.56431	0	0	0	2.89275	8.45572	0.05562	0	0	0	4.15369	0	0	0.54887	0	1498	>500	11	1
OSTEO	2.06186	0.34364	16.7239	12.0275	2.06186	0	0.57273	0	1.03093	6.18557	0.02863	0	0	0.68728	2.56586	0	0	2.8866	1.60367	0.68728	1.00229	10.2329	7.56014	2.52005	0	0.57273	0	1.83276	5.04009	0.07636	0.01145	0	0.11454	2.24513	0.34364	0.05727	2.35968	0.53455	1455	>500	3	1
IPB	0	0.38461	15.3846	11.5385	7.30769	0	0.96153	1.4359	4.23077	4.61538	0.41666	0	0.71794	0	8.97436	0.38461	1.21795	1.94872	0	2.82051	0.51282	9.82906	7.58547	2.62821	0	0.53418	0.71794	1.53846	8.71795	0.50213	0.03846	0	0	7.29915	1.28205	0.16025	1.86325	2.51282	1300	>500	1	1
IPB	0	0	0	0	0	0	0	0	0	0	0	0	0	0	0	0	0	0	0	0	0.45724	3.65798	1.82899	1.02881	0	0.76207	0.42676	0.91449	3.04832	0.0762	0	0.42676	0.45724	3.84088	0	0.32388	2.56059	1.28029	729	>500	15	1
OSTEO	0.63897	0.31948	10.6496	17.3056	4.95208	0	0.79872	0	1.91693	5.96379	0.21299	0	1.19276	0.15974	8.34931	2.55591	0.31948	3.28009	0.59637	0	0.21299	9.01668	9.93965	2.23642	0	0.79872	0.09939	0.74547	4.75683	0.10649	0	0	0	5.16862	1.06496	0.21299	1.81754	1.49095	1565	>500	13	1
IPB	0	0.73529	9.06863	3.49265	7.72059	0	2.45098	0	2.94118	11.2745	0	0	1.02941	0	9.95098	0.36764	0.18382	3.43137	2.05882	0	0.61274	5.88235	5.16748	7.53676	0	1.32761	0	1.22549	8.16993	0	0.03676	0.45751	0.30637	4.80392	0.73529	0	1.25817	0.68627	1360	>500	15	1
IPB	0	1.57729	0	2.36593	1.57729	0	0	0	0	0	0	0	0	0	2.94427	0	0	0	0	7.36067	0.92008	6.65966	3.46127	7.36067	0	0	0.98142	0	5.78339	0.04381	0	0	0	12.7585	0	0.76673	2.48861	0	634	>500	15	1
IPB	0	0.79872	7.45474	13.1789	1.59744	0	2.66241	0	6.38978	10.6496	0	0.03993	0	1.99681	2.9819	0	0	0	0	0	1.26464	3.54988	7.67661	1.59744	0	0.88746	0	6.12354	2.12993	0	0.02662	0	0.13312	1.49095	0	0	0	0	626	>500	1	1
IPB	2.53165	1.89873	7.80591	8.75527	4.11392	0	1.31857	1.18143	2.53165	12.2363	0	0.01582	0.29535	0	6.79325	0	1.23945	2.1308	0.88607	0	1.05485	9.00141	6.54008	1.16034	0	1.49437	0.59071	3.79747	11.0056	0.04395	0.04746	0	0.10548	3.74121	0	0.81751	2.67229	0.68917	1580	>500	15	1
IPB	3.82775	1.43541	11.4832	13.7161	13.8756	0	0	0	8.61244	26.7943	0	0.02392	0.89314	0	4.01914	0	0	8.61244	4.01914	2.55183	0.55821	9.56938	14.673	11.9617	0	0.66454	0.29771	7.6555	20.202	0.05316	0.03189	2.82828	0.15948	1.93514	0	0	10.0585	2.23285	1045	>500	12	1
IPB	0	0.40849	31.5904	11.3017	17.9739	0	4.08497	3.05011	0	4.3573	0	0	10.6754	0	4.57516	0	0	0	13.7255	0	0.13616	19.2447	4.31191	8.44227	0	3.40414	1.0167	0.54466	5.08351	0	0	3.30428	0	4.06681	0	0	0	4.82934	612	>500	12	1
OSTEO	0	0	9.61538	24.8397	4.80769	0	0	0	0	0	0	0.16025	0	0	1.49573	0	0	2.99145	0	0	0	4.2735	11.9302	7.47863	0	0	0	0.53418	1.4245	0.17806	0	0	0	0	0	0	3.49003	0	312	300-500	1	1
OSTEO	0	1.38249	19.9693	16.5899	16.129	0	1.92012	0	6.91244	28.8787	0.1536	0	0	0	13.3333	0	0	3.37942	0.86021	0.92165	0.69124	10.4455	10.1382	11.3671	0	1.28008	0	7.68049	20.4813	0.16641	0.01536	0	0	6.59498	0	0	4.03482	3.01075	1085	>500	11	1
OSTEO	1.74368	1.0898	19.7617	13.5862	2.61552	0	3.99593	0.81371	3.48736	14.5307	0.10897	0.04359	0.40685	0.43591	8.13717	0	0	7.26533	0.81371	1.16245	0.79918	12.787	10.7285	2.61552	0	1.0898	0.54247	1.45307	9.88085	0.15741	0.01453	1.35619	0.1453	5.01792	0	0.19374	4.82418	1.35619	1147	>500	15	1
OSTEO	0	2.43902	5.96206	3.79404	0.813	2.16802	2.71003	0	5.69106	3.52304	0	0.1626	1.51762	0	5.31165	0	1.08401	0	1.51762	1.08401	1.55827	4.51671	5.46522	1.62602	0	1.12918	0.50587	1.35501	8.67209	0.09033	0.01355	0	0	5.05872	0	0	1.51762	0.50587	615	>500	1	1
IPB	0.67069	0.58685	12.296	14.0286	6.03622	0	1.39727	0	7.71294	18.3322	0.72658	0.08383	0.31298	0.33534	3.12989	0	0	3.66644	1.56495	0	0.50301	6.40882	9.98584	2.85044	0	0.27945	0	3.91236	10.433	0.19561	0.05589	0.93896	0.05589	1.7736	0	0	1.95246	2.29525	1491	>500	11	1
OSTEO	0	0.47588	6.55668	16.3388	3.01396	0	0	0	0.63451	5.49915	0.05287	0	0	0	13.3249	0	0.39657	7.38156	0.59221	1.48054	1.13684	10.7163	22.0671	2.6967	0	0.88127	0	1.37479	8.60124	0.14981	0.03701	0.2961	0.10575	20.4315	0	0	9.0877	0.98702	1576	>500	1	1
OSTEO	1.49365	2.9873	14.9365	52.5268	26.699	0	0.62235	1.39408	4.48096	22.4048	0.06223	0.14936	4.53074	0	9.06149	0	0	18.7453	3.48519	0.49788	1.058	11.3683	28.4624	14.812	0	1.45216	0.46469	4.10754	15.4344	0.02074	0.11202	3.71753	0	6.38951	0	0	13.335	3.71753	1339	>500	11	1
OSTEO	0	0.79314	21.1506	3.80711	2.53807	0	1.05753	1.77665	1.26904	7.1912	0.05287	0	0	0	24.8731	0	0.42301	2.22081	5.92217	0	0.37013	14.9464	4.24774	2.53807	0	0.9694	0.78962	1.90355	6.34518	0.31725	0.01057	0.39481	0.10575	13.1275	1.05753	0.0705	0.78962	3.5533	1576	>500	3	1
OSTEO	6.98413	0.55555	21.7989	32.4868	10	0	0.26455	0	6.98413	2.1164	0.21164	0.09523	4.74074	0.79365	14.2222	2.85714	0	3.02646	7.11111	2.53968	0.68783	15.8025	20.8466	4.92063	0	0.70546	0	4.55026	1.69312	0.07936	0.05291	4.74074	0.37037	9.28395	5.18519	0.37037	2.90653	2.76543	1575	>500	1	1
IPB	0	0	4.2328	9.52381	1.5873	0	0	0	0	0	0	0	0	0	7.40741	0	0	8.88889	0	7.40741	1.0582	5.64374	10.4056	4.7619	0	1.76367	0	2.1164	5.64374	0.44091	0	0	0	6.41975	0	0	6.17284	0.98765	315	300-500	1	1
OSTEO	0	0.65703	13.3596	26.1717	2.29961	0	0.54752	0.61322	4.59921	4.81822	0	0.04927	0.61322	0.32851	4.90583	0	0	1.13885	0	0	0.43802	7.51935	15.933	1.09505	0	0.1825	0	4.05169	4.3802	0	0.00547	0.61322	0.05475	2.45291	0	0	0.70083	0.2044	1522	>500	11	1
OSTEO	0	2.21161	23.5905	24.4751	10.6157	0	0.58976	0	4.24628	8.49257	0	0	0	0	7.26586	0	0.61924	10.5449	0.66053	0.4718	1.15004	12.3457	16.3364	4.954	0	0.49146	0	3.77448	6.60533	0.17692	0.02359	0.22017	0.11795	7.48604	0	0.17692	6.02343	0.44035	1413	>500	1	1
OSTEO	0	1.06838	9.49668	32.6448	7.83476	0	1.78063	0	2.849	15.1947	0.05935	0.07122	0	0	7.31244	0	0.53418	11.9658	2.65907	0	2.37417	6.64767	23.4251	4.2735	0	0.39569	0	1.4245	11.0795	0	0.07122	0	0	5.76132	0	0.05935	6.07787	1.9943	702	>500	3	1
OSTEO	4.47928	0.83986	10.8249	13.3445	8.95857	0	0.93318	0	7.83875	9.33184	0	0.05599	1.04517	0	13.0646	0	0.55991	1.15715	2.09033	3.35946	0	5.84795	9.33184	4.47928	0	0.46659	0	3.73274	6.47008	0.01555	0	0	0	6.96777	0.18663	0.65322	0.22396	2.09033	893	>500	15	1
IPB	12.0573	1.69555	30.8968	22.2306	14.6948	0	1.56996	1.40668	10.1733	26.6265	1.31876	0.65938	1.40668	0	9.4951	3.39111	0.50238	8.79176	10.5501	10.8013	1.56996	20.0954	11.9317	9.16855	0	1.56996	0.23444	7.15901	19.1325	0.9629	0.27003	0.70334	0	5.9784	3.13991	0	6.17098	6.91619	1327	>500	12	1
OSTEO	2.66845	1.16744	16.4554	20.7916	8.33889	0	1.11185	0	4.00267	9.7843	0.7505	0.20013	0.62263	0	24.2829	4.00267	0	5.13676	19.6131	0	0.77829	8.96894	10.5255	2.55726	0	0.74123	0	3.33556	5.78163	0.07412	0.08894	0.62263	0.11118	9.23579	2.44608	0.16677	3.23178	9.75465	1499	>500	3	1
IPB	3.22373	1.28949	5.15796	24.2317	3.22373	0	0.53728	0	0.64474	6.01762	0.21491	0.06447	0	0	7.82291	0	0.32237	3.15925	0.60176	0.21491	0.26864	5.65943	22.0288	4.51322	0	0.62683	0	0.42983	7.88022	0.20596	0.00537	0.70205	0.10745	8.52497	0	0.55519	2.60764	0.80234	1551	>500	15	1
OSTEO	0	1.03306	11.9376	9.06795	8.26446	0	1.14784	0	6.19835	16.2994	0	0.06887	0	0	2.57117	0	0.34435	5.14233	2.57117	0	0.91827	5.50964	4.70615	3.21396	0	1.33915	0	5.28007	7.80533	0.01913	0	0	0	1.28558	0	0	4.07101	1.28558	726	>500	1	1
OSTEO	1.93424	0	18.6976	10.1547	4.35203	0	2.41779	3.61057	3.86847	9.99355	0.72533	0	0	0.48355	17.1502	1.93424	0	6.76983	0.90264	1.93424	0.16118	6.76983	4.24457	3.22373	0	1.61186	0.30088	2.25661	6.12508	0.40296	0	0	0	5.11498	0.64474	0	3.5461	0.30088	1034	>500	15	1
IPB	0	0.96626	12.4151	10.7168	5.09487	0	1.75685	0.65589	3.16233	7.96439	0	0.10541	0	0	11.4781	1.75685	0.17568	3.27946	0.65589	0.70274	0.32208	11.9466	7.43734	3.45514	0.15616	0.97602	0.65589	1.75685	8.90138	0.20496	0.01171	0	0	10.1663	1.63973	0.11712	2.38932	0.21863	1423	>500	1	1
IPB	1.28041	0.48015	9.17627	9.49637	9.12292	0	1.60051	0.59752	0.6402	11.0969	0.3201	0.17605	1.19505	0	8.06658	0	0	2.13402	1.79257	0.8536	0.16005	7.11339	6.49097	4.48143	0	1.86726	0.59752	1.92061	3.69896	0.12448	0.11203	0.99587	0	6.07483	0.3201	0	1.26618	1.99175	1562	>500	1	1
IPB	2.48756	2.69486	14.0962	18.7258	4.56053	0	0.69098	0	5.80431	15.7546	0.24184	0.04145	1.16086	0.41459	12.7695	0	0.62189	5.5832	4.64345	2.21117	1.86567	8.19974	14.2805	4.21504	0	1.49714	0	2.62576	11.839	0.39156	0.04145	1.16086	0.27639	11.4796	0.13819	1.15165	4.01695	3.48259	1206	>500	1	1
IPB	0	0.32851	7.88436	23.2151	2.29961	0	0	0	1.31406	8.7604	0	0	0	0	7.35874	0	0	2.36531	0	0	0.1095	5.11024	13.5056	1.31406	0	1.46007	0	1.75208	5.25624	0.05475	0	0	0	5.72346	0	0.1095	3.18295	0.81763	761	>500	15	1
OSTEO	7.01754	7.36842	7.01754	7.25146	11.4035	0	2.63158	0	4.91228	2.80702	0.05847	0.03508	0	0	15.0643	0	0.87719	4.70175	5.89474	8.18713	4.44444	5.45809	5.57505	6.60819	0	0.87719	0	3.50877	1.09162	0.00974	0	0.10916	0.05847	8.2963	0	0.21442	3.15789	4.80312	1425	>500	1	1
OSTEO	0	0	0	0	0	0	0	0	0	0	0	0	0	0	0	0	0	0	0	0	0	0	0	0	0	0	0	0	0	0	0	0	0	0	0	0	0	0	1574	>500	1	1
IPB	0	2.42718	12.945	0	0	0	8.09061	0	9.70874	12.945	0	0.97087	0	0	9.06149	9.70874	0	0	0	0	0.80906	24.8112	8.62999	0	0	1.34844	0	4.85437	28.0475	0	0.64724	0	0	4.53074	9.70874	0	3.0205	0	103	<300	15	1
IPB	1.26984	0.95238	4.65608	8.14815	4.12698	0	4.49735	0	5.07937	2.32804	0.42328	0.03174	0	0	8.2963	0	0	2.28571	5.92593	0.84656	0.74074	1.97531	4.26808	1.69312	0.07054	3.52734	1.08642	2.1164	2.29277	0.28218	0	0.49382	0	5.53086	0.21164	0	1.89065	4.14815	1575	>500	1	1
OSTEO	0	1.53846	11.282	16.9872	5.19231	0	0.64102	0.71794	6.53846	5.64103	0.0641	0.07692	1.4359	0.38461	1.4359	1.53846	0.1923	9.51282	0	1.02564	0.83333	8.2906	10.641	5.12821	0	1.81624	0	4.74359	5.64103	0.04273	0.07051	0.23931	0.1282	0.95726	0.89743	0.1282	5.44444	0.71794	1300	>500	1	1
OSTEO	5.82524	0.72815	4.53074	8.41424	0	0	0	0	0.97087	3.8835	0.16181	0.1699	1.8123	0.48543	5.43689	0.97087	0	4.98382	0	4.20712	0.64724	1.726	10.6257	0.40453	0	0	0	0.16181	1.726	0.10787	0.06472	0.60409	0	4.07767	0.97087	0	3.14995	0	1030	>500	1	1
IPB	1.37268	0.68634	11.8966	12.5829	1.37268	0	2.00183	0	2.74537	6.86342	0	0.06863	0	0.34317	7.36674	0	0	4.11805	1.28117	0	0.28597	9.99009	6.52025	1.42988	0	0.3813	0	1.71585	2.59285	0	0.01715	0.10676	0.45756	5.55174	0	0	3.01228	1.4947	1457	>500	11	1
IPB	2.23214	0.55803	18.2292	15.718	11.7188	0	6.51042	1.04167	5.58036	28.6458	1.30208	0.0558	3.64583	0	4.6875	0	0	3.64583	3.125	1.4881	0.18601	11.2847	11.8428	5.76637	0	1.86012	1.38889	4.27827	17.7331	0.79055	0.1023	2.95139	0.18601	6.42361	0	0.27901	1.90972	4.16667	896	>500	1	1
OSTEO	0	0.50471	17.7209	15.9264	8.74832	0	2.24316	0.62808	3.70121	14.3562	0.11215	0.01682	0.31404	0.33647	4.39659	0.67294	1.51413	4.12741	0.62808	0	0.33647	13.4589	9.88859	6.28084	0	0.74771	0.10468	3.02826	6.87902	0.10281	0.0056	0	0.11215	1.88425	0.7851	2.57963	2.8862	0.83744	1486	>500	11	1
OSTEO	5.66171	1.32696	17.4569	13.9773	1.41543	0	2.94881	0	2.83086	8.72847	0.29488	0.14154	0.66053	0	4.62373	0.70771	1.41543	2.17032	1.9816	1.88724	0.76669	9.82936	8.13871	1.53338	0	0.58976	0.22017	2.12314	11.4021	0.11795	0.07077	0.11008	0	3.19258	0	0.15726	1.11662	1.54124	1413	>500	3	1
OSTEO	0	0.50675	19.1441	28.3784	7.93919	0	2.25225	0.63063	6.75676	11.9369	0.11261	0.16891	1.26126	0.33783	14.5045	1.68919	1.57658	14.1441	15.4505	0.22522	0.33783	11.036	15.6719	5.40541	0	0.84459	0	4.27928	4.35435	0.09384	0.11824	0.63063	0.50675	7.67267	1.23874	0.82582	2.89039	10.4054	1480	>500	1	1
OSTEO	0	1.76056	19.9531	13.3509	3.52113	0	1.46714	3.28638	3.52113	2.34742	0.29342	0	1.64319	0	1.64319	0	0	0	0.82159	0	1.46714	9.19405	5.77074	1.76056	0	0	3.28638	0	3.52113	0	0	0	0	1.64319	0	0	0.07824	0	568	>500	11	1
OSTEO	5.17799	1.61812	21.575	13.8619	17.9612	0	0	1.2082	3.8835	29.342	0.13484	0.12944	1.51025	0	20.5394	0	8.41424	7.98274	11.1758	2.37325	0.80906	13.6641	6.77814	9.76268	0	0	0	3.452	19.0219	0.21574	0.08629	0.20136	0	6.84646	0	4.90831	4.99101	1.00683	1545	>500	11	1
OSTEO	0	0.27777	2.96296	0	0	0	0	0	2.22222	2.96296	0.18518	0	0	0	3.11111	0	0	6.22222	1.03704	0	0.55555	0.49382	0.80246	2.03704	0	0.30864	0.69135	0.37037	7.40741	0.06172	0	0	0	5.87654	0	0	2.93827	0	450	300-500	1	1
OSTEO	1.08932	0.81699	8.7146	18.4277	3.81264	0	1.81554	0	0.54466	5.80973	0.49927	0.08169	3.55846	0.54466	9.15033	0	6.17284	11.3653	0	0.72621	0.45388	9.07771	13.4955	3.08642	0	0.60518	0	0	6.0518	0.24207	0.03631	2.88066	0.09077	4.57516	0.3631	5.44662	5.55556	0.3389	918	>500	1	1
IPB	2.30769	1.15385	7.4359	12.7564	4.23077	0	1.92308	1.07692	1.92308	9.23077	0.64102	0.07692	0.71794	0.38461	6.10256	0.76923	0.57692	8.38462	4.30769	1.28205	1.41026	6.5812	7.39316	3.39744	0	0.64102	0.35897	1.28205	6.7094	0.29914	0.03846	0.59829	0.38461	4.54701	0.25641	0.49145	4.52137	2.15385	1300	>500	1	1
OSTEO	4.58295	0.91659	9.47143	6.5689	4.8121	0	1.52765	0	1.83318	20.7761	0.11457	0	7.27162	0.45829	5.13291	0	0	1.71097	7.27162	3.97189	0.38191	5.09217	4.53203	3.0553	0	1.27304	0	5.19401	12.0175	0.11457	0	4.84774	0	1.85355	0.91659	0	1.14065	3.99226	1091	>500	1	1
OSTEO	7.13776	2.14133	11.8963	10.0523	7.85153	0	5.05591	0	4.63954	17.6065	0	0.05353	0	0	10.326	1.42755	0.89221	10.1356	0	3.8068	1.9034	9.04116	8.34721	5.35332	0	3.27147	0	3.33095	10.9446	0.09913	0.11896	1.22135	0	6.10675	0.71377	0.17844	5.77365	0	1401	>500	1	1
IPB	1.27307	1.43221	18.2474	9.97242	3.66009	0	0	0	2.86442	0.84871	0	0	0	0.31826	1.1882	0	0.15913	2.07935	1.1882	0	1.16698	13.1551	7.00191	1.85657	0	0.26522	0	2.0157	0.84871	0.06188	0.05834	0	0	1.08919	0	0.10608	2.52493	0.99016	1571	>500	11	1
IPB	0	2.0727	17.6446	21.3117	13.7117	0	0.79719	1.19048	8.29082	17.0068	0.05314	0.01594	3.86905	0	3.57143	0	0.31887	8.14201	7.44048	1.27551	1.75383	11.267	16.8297	9.83206	0	0.70861	0	5.95238	12.6134	0.02657	0.04251	2.97619	0	3.27381	0	0.10629	4.53515	5.45635	1568	>500	12	1
IPB	0.89847	1.57233	14.3756	11.3806	10.7817	0	4.49236	0	6.28931	10.7817	0.22461	0.02246	0	0.89847	5.87002	0	0	0.83857	2.51572	0.59898	0.97334	13.4771	8.78507	4.19287	0	2.62055	0	3.59389	5.98982	0.01247	0.04492	0.27952	0.89847	1.1181	0	0	0.59898	1.39762	1113	>500	11	1
IPB	1.81159	1.13225	10.2657	7.62379	11.5489	0	2.26449	0.84541	5.43478	8.45411	0.07548	0.18115	0	0	18.599	0	0.60386	3.5628	7.18599	1.20773	0.6416	5.63607	6.86896	6.18961	0	1.76127	0.5636	3.32126	5.83736	0.05032	0.06038	0	0	8.45411	0.60386	0	2.49597	3.80435	1104	>500	12	1
IPB	7.52587	1.4111	15.9925	7.36908	8.4666	0	1.56789	0	3.29257	11.6024	0.07839	0.04703	2.63405	0	7.02415	0	0	6.33427	0.87801	2.50862	0.78394	7.83945	5.35696	3.60615	0	2.87446	0	2.97899	8.4666	0.18292	0.10975	1.75604	0	3.95108	0	0	4.36919	2.63405	1063	>500	11	1
OSTEO	0	0.72916	7.77778	7.29167	3.33333	0	0.69444	0.38888	3.33333	12.2222	0.03472	0.02083	0	0	7	0	0	0.38888	1.55556	0	0.45138	6.11111	5.34722	2.29167	0	0.23148	0	2.5	11.2963	0.06944	0.01388	0	0.41666	5.44444	0	0	0.57407	0.77777	1200	>500	1	1
OSTEO	0	1.09012	16.9574	23.922	4.72384	0	0.60562	0.67829	5.81395	10.9012	0.06056	0	1.01744	0	9.15698	0.36337	0	1.69574	1.01744	0.24224	0.72674	12.1931	15.3424	3.87597	0	0.30281	0.67829	3.75484	8.55943	0.11103	0.00605	0.11304	0	6.4438	0.36337	0	1.69574	1.13049	1376	>500	13	1
OSTEO	1.34499	0.4203	19.5023	10.0874	2.68998	0	0.2802	6.90428	4.37122	14.3466	0.05604	0.03362	1.88299	0	8.15961	0	0.16812	3.22798	0.62766	2.01748	0.78457	12.7774	8.12598	1.34499	0	0.84061	2.71987	2.91414	11.6566	0.06538	0.0056	1.0461	0	5.75357	1.34499	0.2802	2.35373	1.0461	1487	>500	15	1
OSTEO	0	2.55409	18.4295	11.0176	8.11298	0	1.0016	0	6.61058	1.60256	0.20032	0	0	0.60096	6.73077	1.80288	0.45072	2.32372	0	0.40064	1.20192	8.14637	5.74252	5.30849	0	0.5008	0	1.80288	4.80769	0.06677	0.04006	0	0.40064	4.11325	1.20192	0.35056	1.04167	0	832	>500	1	1
IPB	0	1.18708	6.96423	13.2953	0.94966	0	2.37417	0	1.89934	2.53245	0.07913	0.04748	0	0	3.54543	0.94966	0	5.95125	0.88635	0.63311	1.50364	6.64767	9.52306	0.94966	0	0.79138	0	1.74106	6.96423	0.10551	0	0.14772	0	1.77271	0	0.21103	4.50565	0.88635	1053	>500	1	1
IPB	4.45236	8.01425	20.184	12.9861	4.45236	0	2.96824	0	2.67142	10.6857	0.33392	0.2894	2.07777	0.44523	14.9599	0.89047	1.03888	3.94776	3.32443	4.45236	3.7103	14.0497	7.44533	4.22974	0	0.98941	0	2.81983	9.30048	0.34629	0.0742	0.8311	0.22261	16.2066	1.1873	0.4205	3.04739	2.49332	1123	>500	1	1
OSTEO	2.85442	0.95147	11.4177	10.4662	3.8059	0	0.79289	0	2.85442	13.955	0.03964	0.19029	0.88804	0.95147	2.22011	0	0	2.53727	3.55217	2.22011	0.63431	9.51475	10.0433	2.85442	0	0.26429	0.148	3.17158	3.59446	0.02642	0.07928	0	0.15857	3.25616	0.31715	0	1.60694	2.51612	1051	>500	1	1
OSTEO	0	0.17519	16.3513	6.65732	3.85424	0	0.58397	0.32702	6.65732	4.08783	0.14599	0	0	0	9.15674	0	0.46718	2.61621	1.96216	0	0.08759	12.536	5.33364	2.3943	0	0.58397	0	5.02219	6.34587	0.06813	0	0	0	6.54053	0	0.15572	0.43603	0.87207	1427	>500	3	1
OSTEO	1.5674	1.37147	26.3845	15.8699	17.8291	0	1.30617	0	8.62069	11.4942	0.0653	1.5674	0	0	5.48589	0	0	14.9164	5.85162	0.52246	0.58777	16.806	9.79624	11.1677	0.17415	0	0	4.96343	6.26959	0.02176	0.71185	0.24381	0.71839	1.95054	0	0.30477	9.82236	2.68199	1276	>500	12	1
OSTEO	0	0	0	15.942	0	0	0	0	0	8.69565	0	0	0	0	0	0	0	0	0	0	0	0.48309	14.0097	0	0	0	0	0	0	0	0	0	0	2.70531	0	0	0.28985	0	230	<300	11	1
IPB	4.45434	2.22717	20.7869	10.5791	8.90869	0	0	4.15739	3.34076	5.93912	0.18559	0.33407	0	0	16.6295	0	0	15.5902	2.07869	5.93912	3.89755	9.89854	3.77382	2.96956	0	1.85598	2.77159	2.22717	1.97971	0.18559	0.18559	0.69289	0	15.2438	0	0	10.047	2.07869	449	300-500	1	1
OSTEO	2.75292	1.54852	16.0587	12.847	3.09704	0	0.57352	0	1.72058	11.0117	0	0.0172	2.24822	0.17205	1.2847	0	0.45882	7.66231	1.2847	0.22941	1.37646	13.6117	11.6617	0.91764	0	0.09558	0	1.14705	7.34113	0.09558	0	1.60587	0.05735	4.17527	0.1147	0.30588	5.50585	0.64234	1453	>500	13	1
OSTEO	1.64204	1.02627	15.5993	20.3202	3.69458	0	1.36836	1.91571	4.10509	20.7991	0.30788	0.06157	0	0	16.4751	0	0	3.2567	6.13027	1.09469	1.09469	8.48385	14.8239	2.18938	0	1.48239	0.89399	2.59989	8.75753	0.09122	0.05473	0.63856	0	7.79055	0.82101	0.25086	1.40485	3.06513	1218	>500	13	1
OSTEO	0	0.7136	3.17158	19.7431	0	0	0	2.22011	1.90295	8.24611	0.51538	0	2.22011	0	6.66032	4.28164	2.2994	0	1.77609	1.26863	0.47573	2.00867	11.0477	1.5065	0	0	0.74003	1.26863	7.6118	0.60788	0.01585	2.36812	0	7.84438	4.59879	0.27751	0	1.77609	1051	>500	1	1
OSTEO	0	2.1722	22.1169	14.8104	5.92417	0	0.65824	0	8.68878	0	0.03291	0	2.21169	0	8.84676	0	0	3.68615	1.47446	0.52659	1.74434	15.7978	8.0086	4.0811	0	1.42619	0	5.39758	0.70212	0.07679	0	1.59733	0	6.75794	1.97472	0.16456	3.71248	0.61435	1266	>500	13	1
OSTEO	0	1.70503	8.52515	31.0458	4.68883	0	6.74908	0	1.70503	11.9352	0.24865	0.08525	0	0.42625	3.9784	0.85251	0	9.49133	3.9784	0.28417	1.17221	5.87288	19.5131	2.62859	0	4.14417	0	1.42086	10.7038	0.09472	0.0142	0	0.71042	2.65227	0.85251	0.18944	6.97168	1.59136	1173	>500	1	1
OSTEO	2.94985	0.18436	18.4366	10.6318	2.21239	0	2.15093	0	4.79351	15.2409	0.06145	0.11061	1.03245	0.36873	13.766	0	2.21239	8.45624	2.7532	0.98328	0.49164	14.4215	7.47706	1.96657	0	2.35578	0	3.68732	10.6523	0.1946	0.06145	1.03245	0.12291	12.963	0	0.73746	5.31793	1.3766	1356	>500	1	1
OSTEO	2.46305	7.59442	8.75753	5.40504	9.0312	0	0	0	1.23153	17.515	0.54734	0.04105	0.76628	0.4105	11.4942	0.82101	0.27367	1.64204	0.76628	0.82101	4.31034	6.29447	3.23846	5.33662	0	0	0	5.61029	12.2241	0.15964	0	0.12771	0.13683	9.06769	0.82101	0.18244	1.00347	2.29885	1218	>500	3	1
OSTEO	1.29282	0.64641	17.4531	34.1521	9.85779	0	1.07735	0	5.1713	14.2211	0.1616	0.22624	0	0.64641	9.65309	1.29282	0.4848	2.26244	3.01659	0	0.61947	9.91166	22.6963	8.72657	0	0.80801	0	3.23206	10.4863	0.0808	0.14544	0	1.18509	6.6365	0.53867	0.52072	1.5083	1.20664	1547	>500	11	1
IPB	0	0	5.33333	5.33333	3	0	0	0	0	5.33333	0	0	0	0	4.66667	0	0	1.86667	3.73333	0	0	5.77778	4.5	1.33333	0	0	0	3	2.66667	0	0	0	0.16666	2.17778	0	0	0.93333	1.86667	500	300-500	12	1
OSTEO	0.70372	2.63899	10.7905	18.7661	4.92611	0	0.58644	0	2.81492	3.75323	0.20525	0	0.98522	9.14849	3.28407	0	0.17593	4.03472	0.65681	0	1.81797	8.0538	11.5529	3.40136	0	0.39096	0	1.29017	3.12769	0.02932	0	0.21893	5.86441	1.97044	0	0.25412	2.93221	0.65681	1421	>500	11	1
IPB	0	1.65125	12.7697	14.9714	17.173	0	2.20167	0	1.321	15.8521	0.11008	0.1321	0	0	11.7129	0	0.44033	0	4.93175	0.44033	1.10084	8.21958	13.7605	6.49494	0	2.38515	0	2.64201	7.33891	0.01834	0.06605	0.41097	0	13.7678	0	0	0.44033	2.0549	757	>500	1	1
OSTEO	0	1.13049	9.04393	15.0194	4.68346	2.58398	1.88415	0.60292	2.58398	12.9199	0.08074	0.17764	0	0.32299	11.4556	0.64599	2.15332	1.67959	2.41171	1.07666	0.64599	7.75194	11.1434	3.98363	0.43066	0.53832	0.20097	1.93798	8.75682	0.10766	0.11843	1.10537	0.32299	6.12977	0.75366	1.44452	1.39248	2.71318	1548	>500	1	1
IPB	1.43472	0.71736	12.4342	6.99426	2.51076	0	3.2879	0	2.15208	8.60832	0.11956	0.03586	1.33907	0	2.67814	1.43472	0.35868	0.95648	2.00861	0	0.2989	7.97067	5.20086	1.7934	0	1.4945	0	2.15208	6.69536	0.09963	0.04782	0.22317	0	1.78543	0.95648	0.11956	0.79706	2.00861	1394	>500	15	1
IPB	2.64375	1.32188	15.2016	17.2946	4.2961	0	0	0	3.63516	0	0	0.42961	0.30843	0	6.4772	0	0	6.78564	3.70126	1.7625	1.10156	8.15158	11.0524	0.88125	0	0.73437	0	1.54219	0.29375	0.04589	0.33597	0.92531	0.11015	3.70126	0.33046	0.16523	4.42094	0.92531	1513	>500	11	1
IPB	1.35318	0	11.051	15.7871	8.45737	0	0.56382	0.63148	0.67658	10.9382	0.08457	0.03382	0	0	1.26297	0	1.12765	7.98376	6.31484	0.90211	0.22552	9.84814	12.5169	3.66486	0	0.84573	0.63148	1.69147	9.20914	0.02819	0	0.42098	0	1.05247	0	0.67658	4.08209	2.52594	1478	>500	11	1
IPB	0	0.87135	19.0114	17.9552	6.33714	0	2.90452	0	3.48542	9.71694	0.23764	0.15842	0.29573	0.95057	7.68906	0	0.21123	6.71736	1.18293	1.6899	0.34326	15.702	15.8252	4.33038	0.14082	1.23222	0.29573	2.218	8.30869	0.09681	0.08977	0.39431	0.31685	4.04168	0.21123	0.07041	3.86565	2.76017	1578	>500	11	1
IPB	0	0	18.0018	31.7282	9.0009	0	0.75007	0	5.40054	19.2019	0.0375	0	0	0	2.52025	0	0.90009	9.54095	0.84008	0.30003	0	13.3013	18.2268	7.50075	0	0.25002	0	5.25053	10.401	0	0	0.28002	0	1.54015	0	0.30003	6.82068	0.84008	1111	>500	12	1
OSTEO	0	1.42676	29.5921	27.9011	17.9138	0.21137	1.58529	0.59184	6.65821	16.1699	0.21137	0	0	0.63411	10.3572	0	5.81272	6.51025	2.36736	0.42274	0.29063	18.5303	12.2772	9.08899	0.14091	0.88071	0.19728	4.96724	9.33559	0.16733	0.01585	0.09864	0.31705	6.60889	0.10568	1.63813	3.90333	1.28232	1577	>500	11	1
IPB	3.1746	1.5873	3.1746	2.97619	4.36508	0	5.95238	0	3.96825	15.3439	0	0.25793	1.11111	0	5.55556	0	0.99206	2.80423	11.8519	2.6455	1.38889	2.82187	1.91799	3.63757	0	3.19665	0	3.43915	12.6984	0	0.08597	1.23457	0	2.46914	0	0.69444	1.69312	6.54321	1260	>500	1	1
OSTEO	1.45349	1.2718	13.5659	13.0814	2.90698	0	1.21124	0	0.72674	5.81395	0.48449	0.10901	0	0	10.1744	0	0	2.22868	4.06977	1.45349	0.96899	9.28618	6.68201	1.69574	0	1.41311	0	0	4.11822	0.02018	0.04844	0	0	5.53941	1.69574	0	0.79134	0.90439	1376	>500	3	1
OSTEO	5.24476	4.37063	7.57576	17.0454	6.11888	0	1.45688	0	0	0	0	0	0	0	6.52681	0	0	4.48718	2.44755	0.58275	2.76807	5.63326	7.62432	2.91375	0	0	0	0	0.777	0	0	0.5439	0	3.53535	0	0	2.99145	1.0878	572	>500	11	1
IPB	0.63492	0.31746	16.5079	17.1429	4.7619	0	1.5873	0.44444	4.7619	10.1587	0.15873	0.25396	0	0.47619	5.33333	0	0.23809	4.69841	2.37037	0.84656	0.63492	13.0511	15.0441	4.28571	0	0.17636	0.39506	3.7037	6.20811	0.14109	0.07407	0.09876	0.21164	2.2716	0	0.12345	3.81658	1.28395	1575	>500	11	1
IPB	0	0	5.10856	3.83142	0	0	1.59642	0	3.83142	20.4342	0	0.57471	0	1.91571	3.57599	0	0	2.29885	0	0	0.95785	5.95998	6.06641	0	0	0	0	3.83142	8.51426	0.10642	0.38314	0	0	7.15198	0	0.15964	2.29885	2.38399	261	<300	11	1
OSTEO	1.94553	0.32425	10.16	6.59317	5.83658	0	0.81063	0	4.2153	8.86295	0.02702	0	0	0.16212	2.11846	0.32425	0.08106	9.64116	8.47384	0.21616	0.27021	4.68367	1.98155	2.32382	0	0.36028	0	2.70212	9.9438	0.03602	0	0	0.10808	1.10967	0.32425	0.02702	6.06716	4.64044	1542	>500	3	1
OSTEO	6.34518	0.79314	18.401	10.0465	6.66244	1.69205	4.4945	0.88832	3.80711	8.46024	0.7667	0.09517	0	0	12.4366	0	0.74027	0.59221	2.36887	3.38409	0.71383	11.2803	7.49083	3.70135	0.56401	2.37944	0	2.11506	4.79413	0.37013	0.00528	0	0.05287	8.09363	0	0.19388	0.78962	1.97406	1576	>500	1	1
OSTEO	4.75059	1.78147	16.3632	4.22275	11.4806	0	0	0	3.16706	18.4745	0.46186	0.05938	0.36949	0	4.43389	1.18765	0	2.32251	2.21694	4.22275	1.51755	10.7328	4.31072	10.161	0	0	0	1.84745	16.7151	0.15395	0.02639	1.97062	0	3.69491	0.79176	0	2.00581	1.47796	1263	>500	3	1
IPB	0	0.95419	29.6862	25.8694	7.63359	0	2.12044	0	5.72519	21.2044	0.47709	0.15903	0.59372	0	15.4368	0	0	9.49958	3.56234	0	0.68914	19.3667	15.868	3.39271	0	1.94374	0	8.69381	15.2672	0.28272	0	1.58326	0	10.2912	0	0	4.9477	0.39581	786	>500	11	1
OSTEO	0.69348	1.56033	11.0957	7.85945	2.42718	0	0	0	4.85437	4.85437	0	0.06934	1.2945	0.34674	5.17799	0	0.69348	4.4614	1.94175	0	1.09801	8.62999	6.9926	1.27138	0	0.67421	0	3.12067	3.85267	0.17337	0.05779	1.2945	0.28895	3.77562	0	0.05779	2.65064	2.37325	1442	>500	1	1
IPB	0	0.33444	17.6143	8.41695	15.0502	0	2.22965	0	7.35786	14.7157	0.72463	0.06688	0	0	7.17949	0	0	2.5864	1.87291	0	0.08361	12.0401	5.74136	9.30881	0.29728	1.67224	0	7.24638	12.3374	0.35302	0.11148	1.14456	0	4.16202	0.66889	0.22296	1.32293	3.01747	1495	>500	1	1
OSTEO	5.03356	2.72651	8.94855	8.24944	0	0	2.09732	0	0	0	0.13982	0	0	0	0	0	0	0	5.48098	1.11857	1.53803	7.82998	7.13087	0	0	0	0	1.11857	1.49142	0.06991	0	0	0	2.08799	0	0	0.52199	2.34899	596	>500	3	1
OSTEO	0	0	0	0	0	0	0	0	12.3457	0	0	0	0	0	0	0	0	16.8724	0	0	0	0	0	0	0	1.71468	0	12.3457	0	0.17146	0	0	0	0	0	0	7.68176	3.84088	81	<300	11	1
IPB	1.30548	1.79504	3.91645	19.0383	3.26371	0	2.99173	0.60922	3.59008	18.0592	0.40796	0.11422	0.91383	0.32637	5.17842	0	0.81592	9.94343	7.3107	0	1.1151	4.0615	10.6796	3.69887	0	1.90383	0.8123	2.61097	10.9153	0.12692	0.01087	0.71076	0.05439	4.92457	0	0.38076	6.33885	3.55381	1532	>500	1	1
OSTEO	0	1.23052	13.1255	29.464	5.9475	0	1.36724	0	5.74241	13.6724	0.30762	0.14356	1.53131	0.20508	4.2111	0	0.51271	5.35958	0.76565	0	0.92288	8.47689	16.5892	2.73448	0	0.34181	0	3.4181	8.38574	0.23926	0.11621	0.89326	0.34181	5.10437	0	0.41017	4.19287	0.76565	1219	>500	11	1
IPB	0	0.45045	14.4144	4.8048	0.45045	0	1.12613	0	1.8018	3.6036	0.07507	0	0	0	5.04505	0	0	9.66967	2.52252	0	0	10.4104	3.9039	0	0	1.5015	0	1.5015	2.8028	0.25025	0.01501	0.56056	0	3.5035	1.2012	0	5.3954	1.68168	1110	>500	3	1
OSTEO	3.1746	0.95238	12.4868	9.10053	10.6349	0	5.82011	0	2.53968	18.2011	0.5291	0.20634	0.29629	0	5.33333	0.63492	0.42328	3.08995	5.33333	1.26984	0.44973	11.1464	8.16578	8.78307	0	2.55732	0	3.38624	18.9065	0.40564	0.08465	0.49382	0	4.04938	1.69312	0	2.52557	2.96296	1575	>500	1	1
IPB	0	1.0661	27.7186	13.8593	5.33049	0	0	0	10.661	8.52878	0	0	0	0	18.9055	0	0	6.96517	0.99502	2.1322	2.93177	48.8036	51.8242	8.17342	0	11.2533	1.3267	19.1898	27.9555	0.20729	0.0533	5.3068	0	23.5489	0.35536	0.41459	7.20208	4.97512	469	300-500	1	1
IPB	1.41343	1.06007	8.48057	31.6843	3.35689	0	2.06125	1.3192	4.947	10.8363	0	0	0.65959	0	7.25559	0.70671	0.53003	8.19788	3.298	0.47114	1.00118	7.85238	22.34	4.18139	0	1.57048	0.65959	5.06478	7.22419	0	0.01177	0.21986	0	3.73773	0.70671	0.23557	6.1013	2.74833	1415	>500	1	1
IPB	3.85109	0.96277	15.4044	5.66966	5.13479	0	0	0	3.20924	15.4044	0.08023	0.22464	0	0	1.79718	0	0	3.59435	0	3.42319	0.53487	12.5517	4.99216	3.42319	0	0.44572	0	4.92084	13.5501	0.17829	0.11767	0	0	2.49608	0	0	2.99529	0.39937	1558	>500	11	1
OSTEO	12.474	2.59875	11.088	17.325	14.0333	0	5.63063	0.9702	4.158	8.31601	0	0	0	0	7.76161	17.6715	11.088	10.6722	5.82121	3.465	1.34269	8.54701	8.20051	12.474	0	4.33125	0	4.5045	10.857	0.08662	0.02598	0	0	5.65951	12.8205	5.54401	5.65951	1.9404	962	>500	1	1
OSTEO	1.26743	0.95057	10.1394	6.02028	8.87199	0	1.84833	0	0.31685	11.6181	0.21123	0.03168	2.07013	0.15842	8.57626	0.31685	0	1.52091	0.59146	0.84495	0.87135	7.46374	5.31615	7.55175	0	0.88015	0	1.16181	6.33714	0.13202	0.04224	0.39431	0.15842	5.81608	0.10561	0.0528	1.87298	0.39431	1578	>500	1	1
IPB	3.03951	8.45365	16.2107	13.2979	3.03951	0	12.0314	0	3.03951	8.10537	2.34296	0.07598	0	0	32.2695	0.37993	0.18996	0.70921	14.539	4.30598	4.02102	9.37183	8.90746	1.58308	0	4.32709	0	1.8997	9.2874	1.7836	0	0.1182	0.06332	17.8487	0.63323	0	0.27017	9.33806	1316	>500	1	1
OSTEO	0	0.93984	0	6.89223	0	0	0	0	3.7594	17.5439	0.31328	0.18796	0	0	5.26316	0	0	1.75439	3.50877	2.50627	1.8797	0	5.43024	0	0	2.08855	0	1.25313	10.0251	0.20885	0.18796	0	0	4.67836	0	0	0	0	266	<300	3	1
IPB	3.18066	3.57824	29.8982	14.419	12.4046	0.42408	1.06022	0	8.26972	16.9635	0.45059	0.27035	0.89058	0	7.71841	0	3.49873	0.59372	3.26548	0.63613	1.37829	12.7933	9.71869	7.95165	0	1.67868	0	5.19508	9.18858	0.56545	0.0318	0.98953	0	4.35397	0.63613	0	0.79163	2.27594	1572	>500	1	1
IPB	1.40154	0.17519	8.87643	5.48937	0.70077	0	0	0	2.80308	9.34361	0.26278	0.01751	1.96216	0.70077	6.54053	0	0.35038	0.49053	2.94324	0.46718	0.20439	4.67181	4.39928	1.22635	0	0.58397	0	2.21911	5.60617	0.15572	0.00583	1.52612	0.23359	5.0144	0	0.29198	0	2.39819	1427	>500	1	1
OSTEO	0	3.01088	6.99301	10.0363	7.38151	0	3.2375	0.7252	3.4965	15.54	0.09712	0.03885	1.4504	0	5.80161	0	0.3885	6.39731	1.4504	1.036	2.10438	7.59734	9.94993	6.99301	0	0.53958	0.7252	1.554	9.66934	0.06475	0.03237	0.24173	0	2.9008	0	0.35612	2.83174	0.7252	1287	>500	15	1
IPB	0	1.5121	2.01613	4.03226	0.50403	0	4.6203	0	3.02419	4.03226	0.33602	0	0	0	1.88172	0	1.00806	0	2.82258	0	0.75604	1.5681	2.85618	1.00806	0	4.6203	0	1.84812	2.24014	0.30801	0	0	0	1.5681	0	0.67204	0	1.5681	992	>500	11	1
OSTEO	0	1.83211	14.6569	24.5947	13.6576	0	1.11037	0	1.33245	10.6596	0.05551	0.06662	0	0	10.8816	0	1.27693	4.17499	0.6218	1.11037	0.80501	10.8076	18.1731	7.99467	0	0.9253	0	1.22141	8.73492	0.05551	0.0111	0.20726	0	8.18713	0.44414	0.56443	2.16892	1.03635	1501	>500	13	1
IPB	0	0.91575	5.49451	15.2625	3.663	0	0	0	1.8315	6.10501	0.30525	0	0	0	5.12821	1.8315	0	3.4188	0.8547	0	0.76312	6.51201	10.1241	1.52625	0	1.52625	0.5698	0	3.256	0.07631	0	0	0	3.9886	1.221	0	3.4188	1.4245	546	>500	1	1
IPB	2.32558	0.19379	4.13437	4.84496	1.55039	0	0.32299	0	1.93798	7.49354	0.03229	0.03875	0.72351	0.38759	4.34109	0.77519	0.19379	0.36175	1.44703	0.77519	0.32299	6.02929	4.93109	1.35659	0	0.86132	0.84409	4.00517	8.39793	0.19379	0	0.48234	0.19379	4.46167	4.65116	0.47372	0.24117	0.60292	1290	>500	1	1
IPB	0.76982	1.15473	4.10572	4.10572	1.15473	0	2.24532	0	0.76982	2.56608	0	0.03849	0.7185	0	3.59251	0	0	0.7185	2.1555	1.79625	1.15473	6.84287	8.06176	1.41134	0	3.10068	0	1.28304	4.44787	0.08553	0.05132	0.83825	0	5.02951	0	0	0.7185	2.99376	1299	>500	1	1
IPB	0	1.30208	16.7824	16.7824	5.64236	0	0.72337	0	8.68056	19.6759	0.18084	0.1302	0	0	4.86111	0	1.15741	5.6713	2.83565	2.60417	0.94039	11.6705	9.57272	4.62963	0	1.08507	0	5.64236	15.8179	0.01205	0.1302	0	0.43402	3.5108	0	0.74749	3.5108	0.54012	1152	>500	11	1
OSTEO	0	0	25.5747	18.8937	11.8535	0	0	0	6.89655	6.89655	0.07183	0.21551	0	0	2.41379	0	0	1.72414	3.21839	0.57471	0.07183	13.3142	12.5479	8.40517	0	0.83812	0	4.5977	3.63985	0.22749	0.06465	0	0.14367	2.95019	0	0.07183	1.93487	1.0728	1160	>500	15	1
OSTEO	1.90597	1.42948	11.2241	12.177	7.1474	0	2.9119	0	5.40025	19.0597	0.15883	0.04764	0.59296	0.95298	13.6383	0.95298	0.63532	3.62135	6.81914	1.6942	1.19123	12.1418	9.24749	5.40025	0	2.29423	0	5.40025	13.5536	0.1853	0.05294	0.79062	0.21177	11.7111	0.42354	0.58238	5.35084	3.8543	1574	>500	1	1
IPB	0	1.66667	15.873	12.6455	12.381	0	1.0582	0	4.12698	22.8571	0.5291	0.03174	0	0.47619	5.92593	0	0.15873	2.66667	2.66667	0.42328	1.11111	7.90123	8.2716	9.68254	0	0.5291	0	4.65608	16.9312	0.17636	0.03703	0	0.31746	5.1358	0	0.05291	1.08642	2.46914	1575	>500	1	1
IPB	3.18471	1.99045	15.9236	15.9236	7.96178	0	2.65393	0	3.18471	6.36943	0.13269	0.07961	0	0	2.9724	0	0	9.23567	0	2.12314	0.92887	6.72328	6.67905	3.98089	0	0.44232	0.49539	2.12314	3.53857	0	0.02653	0.49539	0	1.2385	0	0	3.14933	0	628	>500	11	1
OSTEO	0	1.61439	5.53506	8.86634	4.15129	0	1.28126	0	4.61255	14.7601	0.02562	0.615	0	0	6.02706	0	1.07626	2.52153	0	0.205	0.97375	1.91335	7.08965	4.40754	0	0.34167	0	3.28003	10.0451	0.05979	0.25112	0	0.05125	4.44854	0.1025	0.35875	2.19352	0	1626	>500	1	1
IPB	3.5014	1.92577	13.7722	14.0056	5.95238	1.40056	0	0	2.10084	7.46965	0.05835	0.07002	1.63399	0	8.82353	0	6.47759	2.61438	0	1.40056	0.9337	8.87021	7.68363	4.08497	0.46685	1.45892	0	2.33427	4.3573	0.05835	0.03501	1.52505	0.11671	6.53595	0.9337	4.23086	1.63399	0	1428	>500	1	1
IPB	1.29955	4.71085	16.8941	15.8111	15.757	0	3.24886	1.21291	2.92398	20.7927	0.37903	0.03248	1.21291	0.32488	14.2517	0.64977	1.62443	2.49079	3.03227	1.08295	2.65324	8.15826	8.88023	10.0715	0	1.1732	0.50537	0.21659	9.16901	0.41513	0.03248	1.51614	0.10829	8.79359	1.08295	0.78514	1.81214	1.21291	1539	>500	1	1
IPB	10.0376	2.97992	21.7482	47.9925	26.6625	0	1.04559	1.75659	2.50941	25.9306	0.10455	0.06273	2.34212	0	15.2238	0	0	5.01882	8.19741	2.09118	0.36595	11.0135	12.4773	9.51485	0	1.21985	0.7807	1.46382	11.7106	0.0697	0.01045	0.39035	0	5.66011	0.41823	0	3.91747	3.51317	797	>500	12	1
OSTEO	4.3573	2.31481	13.435	21.2418	3.26797	0	5.44662	2.03341	3.26797	11.6195	0.45388	0.05446	2.03341	0.54466	21.3508	0	0.54466	2.83224	5.08351	4.3573	1.54321	7.86734	15.9465	1.9971	0	3.47979	1.3556	3.44953	8.23045	0.18155	0.11801	0	0	14.0644	0.72621	0.27233	2.61438	1.3556	918	>500	15	1
OSTEO	0	0	7.91766	16.825	4.75059	0	0	0	3.56295	17.4188	0	0	0	0	6.65083	2.3753	0	10.5305	0	1.58353	0.39588	6.86197	12.1074	2.17736	0	0	0	3.95883	6.33413	0.23093	0.01979	0	0	6.28134	1.18765	0.19794	6.65083	0.36949	842	>500	13	1
OSTEO	9.51777	1.58629	11.4213	12.2673	6.82107	1.69205	5.02327	0	0	9.30626	0.26438	0.20621	2.07276	0.63451	4.73773	0	0	1.64975	2.96108	3.17259	0.68739	6.62719	7.20883	5.49915	0	2.82008	0	0.42301	6.06317	0.15862	0.15862	1.18443	0.31725	2.96108	0.74027	0	1.31134	2.86238	1576	>500	1	1
OSTEO	2.53807	0	10.3638	20.6218	7.29695	0	0.79314	0	4.44162	4.23012	0.02643	0.1269	0	0	4.14552	1.90355	0.47588	1.81895	1.48054	1.69205	0.10575	6.13367	13.9065	4.38875	0	0.3525	0	3.17259	2.11506	0.18506	0.09517	0	0	3.05979	1.37479	0.15862	1.70615	1.18443	1576	>500	11	1
OSTEO	0	0.48107	20.0983	19.7242	15.2341	0	0.53453	0	8.01796	21.3812	0.21381	0.16035	0.29933	0	5.98674	0	0	4.78939	1.79602	0	0.21381	17.0337	12.9891	9.46119	0	2.04903	0	4.49006	13.5414	0.13363	0.03207	1.19735	0	3.69183	0	0.42762	3.87713	1.49669	1559	>500	11	1
IPB	5.12492	1.28123	10.6769	5.23169	12.492	0	1.60154	0	3.84369	9.39569	0.05338	0.09609	0	0	2.98954	0	1.44138	3.99317	1.19581	5.12492	1.30792	7.6162	4.91138	8.96861	0	1.33461	0	2.776	10.2498	0.04448	0.0427	0	0	2.88989	0.42707	1.12108	1.69407	0.5979	1561	>500	13	1
OSTEO	5.37273	1.34318	16.7898	7.61137	2.85426	0	0.27982	0	3.35796	12.0886	0.25184	0.05036	0.62681	0	2.82069	0	0.41974	0.3134	4.38773	1.56705	0.53167	9.70077	3.28334	2.40654	0	0.3731	0.41787	1.45512	7.0144	0.1026	0.02798	0.73128	0	4.07432	0	0.05596	0.29848	3.65644	1489	>500	3	1
OSTEO	0	0	2.71003	5.82656	0.813	0	0	0.7588	0	4.60705	0	0.04065	0	0	0.7588	1.21951	1.62602	0.8943	0	0.271	0.03387	7.04607	12.2403	1.21951	0	0.33875	0.25293	0.271	9.39476	0.02258	0.02032	0	0.1355	0.88527	4.33604	5.32972	3.39657	2.65583	1230	>500	15	1
IPB	5.52486	0.4604	8.90117	17.035	8.28729	0	2.6857	0	3.68324	15.5003	0.15346	0	0.85942	0.2302	16.329	0	0	4.41989	1.71885	0.92081	0.30693	7.26417	13.4796	4.45058	0.10231	0.89523	0	2.76243	13.4029	0.12789	0.00767	1.1459	0	12.0319	0.92081	0.20462	2.37364	0.85942	1086	>500	12	1
OSTEO	0	1.58562	7.98685	3.81724	1.7618	1.87926	2.34907	0	7.39958	7.51703	0	0.03523	0.65774	1.05708	12.4971	0	0.52854	6.24853	1.31548	0	1.05708	6.10759	3.15167	1.5269	1.25284	0.39151	0.21924	6.34249	5.87268	0	0.01174	0.65774	0.11745	8.76987	0	0.05872	2.85021	0.65774	1419	>500	13	1
IPB	0	1.16822	36.1371	81.4642	20.0935	0	2.33645	0	5.60748	19.9377	0.15576	0.18691	2.61682	0	11.3396	0.93457	0	1.74455	7.85047	1.24611	0.85669	18.6916	46.6251	12.6168	0	5.19211	0	4.36137	8.72274	0.02596	0.0623	1.74455	0	3.19834	0.31152	0	1.34995	4.94289	535	>500	11	1
IPB	2.54615	0.9548	10.1846	13.1551	3.34182	0	3.44791	2.97051	0.63653	3.39487	0.2387	0.15913	2.97051	0.31826	9.50562	1.27307	0.15913	2.41884	1.7823	1.27307	0.15913	7.07264	8.11585	2.33397	0	3.09428	2.17837	0	5.0923	0.15913	0.06365	1.98034	0.21217	7.6243	1.37916	0.10608	2.81491	3.36657	1571	>500	1	1
IPB	0	0.9124	32.8467	24.483	28.7409	0	3.42153	0	5.47445	18.8564	0.07603	0.13686	2.12895	0	1.70316	0	0	11.4963	4.25791	0	0.38017	13.5847	14.8773	13.9903	0	1.26723	0	3.49757	12.3682	0.13939	0.02281	2.41281	0	2.27088	0.4562	0	3.24412	3.40633	1096	>500	12	1
IPB	3.62845	0.63497	19.1098	12.2158	9.61538	0	0.60474	0	2.90276	4.11224	0.03023	0.07256	0	0.36284	0	0	0.45355	15.1911	2.70924	3.38655	0.36284	13.6268	6.65215	8.10353	0	0.20158	0	3.14465	2.82213	0.03023	0.03628	0.11288	0.18142	0.67731	0	0.26205	10.3854	0.90308	1378	>500	11	1
OSTEO	0	1.29534	3.45423	0	0	0	0	0	0	0	0.21588	0	0	1.29534	4.83592	0	0	0	0	0	0	2.30282	0	0	0	0	0	0	1.15141	0.32383	0	0	0	3.62694	0	0	0	0	386	300-500	1	1
IPB	2.71739	2.03804	15.1721	12.7378	3.73641	0	1.98143	0	2.37772	10.1902	0.11322	0.08491	3.17029	0	19.6558	0	0	3.75906	1.26812	0.45289	1.18886	9.13345	9.32216	4.07609	0	1.88708	0	0.90579	5.58575	0.15096	0.04528	2.64191	0.22644	13.3152	0.22644	0	2.6721	1.58514	1472	>500	1	1
OSTEO	0	0.19409	6.46998	2.91149	0	0	1.61749	0	1.1646	2.84679	0.06469	0.03881	0.72463	0	6.15942	0	1.0999	1.08696	1.44928	0.25879	0	3.88199	1.85473	0	0	0.53916	0.24154	1.294	2.07039	0.05391	0.00646	0.24154	0	4.4686	0	0.45289	0.84541	0.72463	1288	>500	1	1
OSTEO	2.4	1.4	11.4667	5.73333	8.8	0	4	0	4.8	14.9333	0.2	0.12	0	0	11.5733	0	2.66667	6.58667	16.0533	0	0.26666	8.88889	5.11111	5.46667	0	1.44444	0	3.46667	9.95556	0.23333	0.08666	0	0	3.48444	6.8	1.51111	3.49333	9.45778	1250	>500	1	1
IPB	0	1.22699	6.13497	7.05521	0	0	1.02249	0	1.22699	14.7239	0	0	0.57259	0	4.58078	0	2.45399	3.68098	0	0	0.30674	7.36196	6.23722	0.71574	0	0.68166	0	1.84049	6.2713	0	0	0.19086	0	2.48125	0	1.1077	1.79959	0.76346	815	>500	1	1
OSTEO	1.9685	0.98425	14.6544	14.1076	4.92126	0	1.09361	0.61242	5.24934	18.4821	0.10936	0.16404	0	0.65616	16.5354	0	0.08202	9.25197	0.91863	0.21872	0.21872	11.1549	9.00408	3.3902	0	1.54929	0.61242	3.82765	14.5086	0.04556	0.07108	0.10207	0.38276	9.28842	0	0	6.53981	1.32692	1524	>500	15	1
OSTEO	3.32779	1.5599	8.8741	5.54631	0	0	0	0	0.83194	2.21852	0	0	0	0	5.43539	1.24792	0.62396	1.94121	2.32945	0.55463	0.41597	4.99168	4.0673	0.69328	0	0	0	0.27731	4.99168	0.0231	0	0	0.13865	2.71769	0.83194	0.27731	1.29414	0.90589	1202	>500	3	1
IPB	0	9.01442	10.4167	0.60096	4.80769	0	0	0	4.80769	4.80769	0	0	0	0	6.73077	0	0	0	23.5577	0	4.40705	6.41026	0.60096	2.00321	0	0	0	0	3.47222	0.03338	0	0	0	2.24359	0.80128	0	0	11.218	416	300-500	1	1
IPB	0	2.38095	27.7249	33.9682	8.25397	0	2.1164	0.29629	4.7619	16.0847	0.291	0.09523	0.29629	0	4.44444	0	0.15873	6.26455	1.48148	0	0.68783	4.79718	4.40917	1.74603	0	0.61728	0	1.37566	4.79718	0.04409	0	0.39506	0	1.48148	0	0.07054	1.11464	0	1575	>500	11	1
IPB	1.45773	0.54664	30.3693	42.6992	17.8571	0	0.60738	0	3.64431	7.77454	0.0911	0.05466	0	0	3.06122	0.36443	0	7.19145	2.04082	1.45773	0.21258	24.0525	22.8377	10.6293	0	1.11354	0.45351	3.76579	8.42242	0.07086	0.06073	0.68027	0	2.26757	2.06511	0.06073	6.46259	1.92744	1372	>500	12	1
OSTEO	0	1.53883	15.4672	23.9899	8.52273	0	0.78914	0	4.73485	11.3636	0.07891	0.66287	3.97727	0	1.32576	0	0	5.55556	7.07071	0.63131	1.89394	11.1532	14.3624	6.1553	0	1.70981	0	2.68308	5.15572	0	0.44981	2.79882	0.23674	1.32576	0	0	6.22896	6.62879	1056	>500	1	1
OSTEO	0	1.47569	15.2778	19.3866	10.0694	0	0	1.2963	3.47222	15.2778	0.28935	0.03472	0	0	4.86111	0	5.09259	10.5324	0.64814	0	0.26041	9.25926	6.98302	3.18287	0	0.09645	0	2.5463	6.94444	0.02893	0.01157	1.08025	0	3.24074	2.77778	6.19213	4.17438	0.43209	1440	>500	11	1
IPB	3.71058	0.46382	5.56586	13.1416	2.78293	0	2.70563	0	1.85529	6.18429	0.30921	0.41743	1.7316	0	10.8225	1.85529	0.34786	7.79221	5.19481	0.61842	0.38651	3.19522	6.54504	2.1645	0	0.64419	0	1.23686	3.29829	0.12883	0.22418	1.0101	0	8.80231	0.92764	0	3.76211	2.0202	1078	>500	1	1
IPB	1.29366	1.21281	19.6205	6.68392	8.5705	0.86244	2.1561	0	2.58732	14.2303	0.0539	0.03234	0	0	11.7723	0	1.0511	4.44157	3.01854	1.50927	0.88939	10.8524	4.42001	4.09659	0.7187	1.16789	0	1.50927	8.22912	0.07187	0.02156	0.20123	0.1078	7.74759	0	0.70073	3.00417	2.01236	1546	>500	12	1
OSTEO	0	2.61407	12.6743	30.5767	8.79278	0	2.37643	0	3.80228	25.3485	0.55449	0.04752	0	0.47528	5.32319	0	0.47528	4.43599	3.5488	2.53485	1.6635	6.97085	16.4237	5.46578	0	0.26404	0	2.85171	13.308	0.09241	0.01584	0	0.79214	2.80946	0	0.07921	1.7744	2.218	1052	>500	15	1
OSTEO	0	4.46429	0	46.1309	0	0	0	0	0	0	0	0	0	0	0	0	0	0	16.6667	11.9048	5.20833	5.95238	27.2817	1.4881	0	0	0	0	0	0	0	0	0	5.55556	0	0	0	13.8889	56	<300	11	1
IPB	3.68324	0.5755	17.4954	14.5028	2.07182	0	0	0.85942	4.14365	8.59423	0	0.13812	0.85942	0.2302	2.57827	0	0.2302	6.99816	0	0.61387	1.07428	31.6145	28.0847	14.5795	0.20462	2.94148	0.42971	5.8318	20.8717	0.17904	0.1151	0.71618	0.4604	8.30776	0.30693	0.44761	8.98302	2.29179	1086	>500	11	1
IPB	0	1.98824	11.526	17.7501	2.42047	0	2.01706	2.25911	1.03734	17.6349	0.2017	0.06915	0.96818	0	10.9728	1.72891	0.69156	3.96496	4.51821	0.92208	0.34578	11.3724	10.7192	3.11203	0	0.67235	0.4303	0.5763	14.3307	0.26894	0.05763	0.4303	0	6.66974	0.46104	0.46104	3.53465	2.68941	1446	>500	1	1
IPB	0	0	11.5183	17.2775	11.2565	0	2.1815	0	5.75916	10.4712	0	0	0	0	0	0	0	7.95812	2.93194	0	0.47993	11.402	8.37696	9.07504	0	1.59977	0.32577	3.31588	11.8674	0	0.04363	0.97731	0	3.42059	0	0	5.93368	3.25771	955	>500	12	1
IPB	0.63451	4.28299	15.4399	17.3964	10.4695	0	3.17259	0	4.12437	10.9983	0.5552	0.17449	1.77665	0	10.956	0.31725	0.63451	10.956	7.99492	0.84602	2.19437	9.16526	13.4659	7.98435	0.0705	3.08446	0	1.48054	10.9983	0.42301	0.06873	1.08573	0	8.98195	0.95177	0.68739	6.18302	4.04681	1576	>500	1	1
IPB	2.0555	2.31244	22.6105	17.2148	4.88181	0	1.28469	0	5.65262	4.111	0.17129	0.10277	5.7554	0.51387	7.67386	1.02775	0.9421	0	6.71463	0.68516	0.85645	10.1633	8.13635	1.88421	0	1.28469	0.31974	3.42583	4.22519	0.05709	0.07708	1.91847	0	4.95604	0.17129	0.91355	0.13703	2.8777	973	>500	1	1
IPB	0	0	0	4.86618	0	0	0	0	0	4.86618	0	0	3.40633	0	0	0	0	0	0	0	1.82482	9.73236	10.7462	3.64964	1.62206	2.02758	0	6.08273	4.05515	0	0.12165	0	0	2.27088	0	0	3.73074	13.6253	137	<300	1	1
IPB	2.89645	1.2672	9.1721	8.56867	10.1376	0	0.30171	0	2.5344	7.24113	0	0.07241	1.01376	0	0.67583	1.08617	0	0.84479	1.01376	1.93097	0.42239	8.52844	4.82742	7.84456	0	0.10057	0	3.01714	5.14925	0.04022	0	0.45055	0	1.35168	2.5344	0	0.78847	0.45055	1381	>500	13	1
OSTEO	0	1.28111	28.7945	6.46657	3.66032	0	0.61005	0	3.66032	16.5935	0.061	0.0732	0.68326	0	6.8326	1.46413	0.54904	4.29478	2.73304	1.46413	1.37262	18.871	3.39597	2.68424	0	0.61005	0	2.3182	12.0384	0.22368	0.0122	1.59427	0	3.53018	0.48804	0.18301	3.38376	0.79713	1366	>500	3	1
OSTEO	2.53325	1.58328	16.6772	9.28858	5.38315	0	0.52776	1.77327	3.79987	18.3661	0.02638	0.30082	2.36437	0	15.9595	1.26662	0	0.88663	1.77327	1.89994	1.1083	14.5662	6.28035	4.53874	0	0.79164	0.19703	2.00549	16.7124	0.06157	0.18999	1.47773	0	10.5411	0.63331	0.10555	1.0133	1.77327	1579	>500	3	1
IPB	2.63331	0.49374	17.9943	12.6728	8.2291	0	4.38885	0	5.26662	8.7777	0.46631	0.13166	2.15054	0.65832	10.7527	4.27913	0.43888	0	4.30108	3.0722	0.38402	10.7527	7.69878	4.27913	0	1.82869	0.20481	3.51108	6.43698	0.32002	0.02194	1.94572	0.76804	7.7829	2.41387	0.14629	0.02925	2.66257	1519	>500	1	1
IPB	1.94742	0.73028	0	2.43427	2.19085	0	0.81142	0	0	8.43882	0.36514	0.02434	0	0.9737	10.9055	0	0.32456	0	4.54398	1.94742	0.64913	0	2.13675	1.62285	0	0	0	0	4.3276	0.06761	0.04057	0.60586	0	5.45278	0	0	0	1.21173	1027	>500	1	1
OSTEO	0	0	0	0	0	0	0	0	0	0	0	0	0	0	0	0	0	0	0	0	0	2.60213	0.52042	1.17096	0	0	0	0	3.12256	0	0	0.72859	0	0	0	0	0	1.45719	427	300-500	15	1
OSTEO	0	1.37489	13.4433	15.3529	3.66636	0	1.90956	0	5.95784	18.9429	0.30553	0.13748	0.85548	0	5.98839	0.91659	0.61106	5.62175	6.84387	0	0.38191	10.5917	8.75853	2.13871	0	1.52765	0	3.0553	10.1843	0.16549	0.12221	0.57032	0	4.84774	2.13871	0.20368	3.15714	1.99613	1091	>500	15	1
OSTEO	0	1.5411	17.8082	22.7169	2.73973	0	0.57077	0	6.16438	10.0457	0.05707	0	0	0	12.4657	1.36986	0	1.27854	6.39269	0.45662	1.71233	9.28463	13.3181	1.82648	0	0.38051	0	4.56621	11.5677	0.22831	0	0	0	12.9985	0.91324	0.11415	1.27854	3.40944	730	>500	1	1
OSTEO	2.58065	0.48387	22.1505	21.7204	10.8064	0	0.53763	0	3.22581	14.6237	0.10752	0	1.2043	0.32258	4.51613	0.96774	0	6.45161	4.21505	1.07527	0.21505	15.3405	12.6344	6.34409	0	0.17921	0.10035	5.05376	10.3226	0.1344	0	0.60215	0	2.81004	0.21505	0.21505	3.76344	4.8172	1550	>500	11	1
OSTEO	0	1.26689	17.455	20.6926	9.29054	0	3.51914	0	1.68919	19.7072	0.03519	0	2.75901	0	16.9482	0.84459	0.31672	5.51802	8.67117	0.56306	0.70382	11.2613	10.6278	4.57489	0	1.75957	0	1.97072	9.94745	0.04692	0.04926	3.15315	0	8.93393	0	0.21114	2.62763	4.59835	1184	>500	1	1
OSTEO	0	0	10.828	8.59873	5.73248	0	1.32696	0.59447	2.54777	6.47558	0.21231	0.01592	0	0	1.4862	0	2.38854	2.84501	0.59447	0	0.31847	6.58174	6.79406	3.82166	0	1.06157	0	1.27389	3.57396	0.00884	0.0053	0	0.10615	1.9816	0.10615	1.22081	2.29299	0.19815	1570	>500	11	1
OSTEO	0	0	20.0401	13.8611	5.51102	0	2.08751	0	8.01603	16.0321	0.0835	0.0501	0	0	6.07882	0	0	13.4268	2.80561	0.668	0	16.0321	9.82521	3.00601	0	1.25251	0	4.67602	7.34803	0.167	0	0.62346	0	2.49388	0.334	0	10.5767	1.24694	998	>500	3	1
IPB	0	0	14.7955	6.52742	11.7493	0.87032	0	0	1.30548	8.70322	0.10879	0.03263	0	1.63185	3.04613	0.65274	0.32637	5.48303	0	0	0.32637	13.3449	8.48564	6.30983	0.2901	0.36263	0.40615	6.30983	5.22193	0.45329	0.04351	0	0.65274	3.45228	0.43516	0.32637	3.84392	1.6246	766	>500	1	1
IPB	1.26582	0.15822	13.924	13.3439	3.16456	0	2.90084	1.18143	11.3924	13.0802	0.44831	0.15822	0.59071	1.89873	9.45148	0	1.42405	3.81857	3.83966	0.84388	0.50105	11.1814	7.50703	1.63502	0	2.1097	0.39381	5.59072	9.14205	0.33403	0.02109	0.39381	1.16034	4.92264	0	0.60654	2.20816	2.95359	1580	>500	1	1
IPB	0	1.01133	8.62999	5.2589	5.66343	0	0.67421	0	0	5.39374	0.60679	0	0	0	4.53074	0	1.82039	0	6.04099	0.53937	0.13484	6.11291	3.55088	0.80906	0	0.44947	0	0	1.88781	0.44947	0	0	0	3.52391	0	0.40453	0	5.28587	618	>500	15	1
OSTEO	5.67779	3.37119	14.1945	11.5922	4.96806	0	3.84433	1.32482	9.2264	8.51668	0.23657	0	1.32482	0	6.29288	0	2.83889	8.01987	2.64963	1.65602	2.54317	9.14754	7.92524	3.72605	0	1.38002	0.99361	3.31204	5.20464	0.07885	0.02365	0.552	0	4.08485	0.23657	1.50816	4.26623	1.87682	1409	>500	3	1
OSTEO	5.34045	1.502	21.3618	12.0716	8.01068	0	2.22519	0.62305	6.67557	22.4744	0.41722	0.06675	0	0.50066	8.72274	0	0.16688	14.9533	2.18069	0.89007	0.55629	9.64249	5.41463	3.5603	0	1.11259	0	2.89275	10.5326	0.07417	0.05562	0	0.05562	5.08827	0	0.22251	7.35796	0.62305	1498	>500	15	1
IPB	5.32387	0.33274	20.9997	16.6371	7.09849	0	0	0	8.87311	17.1547	0.81336	0	0.41407	0.22182	9.10973	0	0	2.48447	3.31263	5.61964	0.36971	13.9012	9.41536	5.76752	0	0.73942	0	2.9577	14.6406	0.33274	0	0.27605	0.14788	7.86749	0	0	1.65631	2.20842	1127	>500	1	1
OSTEO	0	0.61025	31.1907	13.629	6.91619	0	0.67805	2.27828	3.25468	9.76404	0.40683	0.16273	2.65799	0	6.45511	0.81366	2.23759	16.7616	4.17684	0.27122	0.61025	24.0485	11.301	5.35666	0	0.45203	1.77199	2.16979	9.22159	0.18081	0.0678	3.54398	0	2.53142	0.94928	1.35612	9.76404	1.64542	1229	>500	11	1
OSTEO	3.1746	1.42857	18.4127	27.7249	7.46032	0	2.1164	0	3.49206	11.0053	0.21164	0.11111	0	0.79365	20.4444	0	0.63492	10.1587	1.48148	3.38624	0.34391	12.0635	19.224	5.92593	0	0.97001	0	3.28042	11.0053	0.07936	0.06878	0.09876	0.74074	8.49383	0.10582	0.63492	5.8836	1.38272	1575	>500	11	1
IPB	0	0.2354	23.2266	36.4878	7.53296	0	1.17702	0	2.82486	18.8324	0	0	0	0	4.83365	0	0	3.89203	3.9548	0	0	1.46474	2.40636	0.62774	0	0	0	0.31387	1.25549	0	0	0	0	0.29294	0	0	0.62774	0.14647	1062	>500	12	1
IPB	0	2.58506	14.4541	19.4574	6.17078	0	2.2237	2.17923	2.33489	28.4634	0.05559	0.16677	0	0	14.3207	3.33556	1.58439	5.24794	0	1.33422	1.83456	8.30183	14.4911	5.05893	0	1.48247	0.93395	0	13.9352	0.08338	0.07782	0.10377	0	9.65088	2.77963	0.52812	3.97302	1.1415	1499	>500	15	1
IPB	2.23464	1.39665	26.0708	13.8734	13.1285	0	0.46554	0	8.37989	10.8007	0.79143	0.11173	0	0	18.7709	0	0.74487	10.9497	1.04283	1.11732	1.76909	19.7393	8.03849	9.12477	0	1.08628	0	5.95903	9.37306	0.07759	0.03724	0.52141	0.37243	9.55928	0	0.58969	5.38796	2.95469	895	>500	1	1
OSTEO	0	1.89394	0	0	0	0	0	0	0	0	0	0	0	0	14.1414	0	0	1.0101	0	5.05051	1.26263	0	0	5.05051	0	0	0	0	0	0	0	0	0	7.07071	0	0	3.0303	0	132	<300	11	1
OSTEO	1.29618	0.89112	11.8816	15.2841	10.3694	0	1.62022	0	1.29618	12.9618	0.054	0.08101	0.60488	0.16202	9.37568	0.32404	0.64808	0.43205	3.02441	1.29618	0.86411	10.2254	13.2138	8.37114	0	0.72009	0.10081	1.94426	8.42515	0.10801	0.07561	1.61302	0	6.35126	0.86411	0.21602	2.59235	1.91546	1543	>500	11	1
IPB	1.36426	1.96112	17.508	24.5566	8.35607	0	0.85266	0.31832	6.13915	14.0973	0	0	0	0	26.4211	0.68212	0.54001	0.95497	2.54661	0.68212	1.33583	11.1414	17.0343	4.94543	0.15158	0.37896	0.1061	3.86539	10.1182	0.00947	0	0.63665	0	15.3858	0.22737	0.17053	0.63665	1.06109	1466	>500	15	1
OSTEO	1.31752	0.65876	21.0804	2.30567	5.27009	0	0	0.61484	3.95257	18.0062	0.02744	0	0	0	1.84453	0	0.43917	2.32762	1.22969	0	0.43917	13.834	2.50695	3.73298	0	0.36597	0.61484	2.41546	12.4433	0	0	0	0.16469	1.63958	0	0.29278	1.63958	0.81979	1518	>500	3	1
IPB	0	0	10.5887	13.2359	4.12961	0	0.52943	0.59296	2.85896	7.20034	0.02647	0	0	0	2.96485	0	0	1.99068	0.88945	0.21177	0	8.47099	8.08273	2.85896	0	0.61767	0.49414	1.6942	4.65904	0.06176	0.01058	0	0	2.86602	0	0	1.27065	0.88945	1574	>500	11	1
OSTEO	2.96956	0.18559	18.8072	19.7352	17.2606	0	1.23732	0	7.05271	33.655	0	0.03711	0	0.74239	6.23608	0	0.27839	6.4588	0	0.98985	0.24746	16.2501	16.0439	12.6206	0	0.82487	0	7.91883	22.7666	0.01031	0.01237	0	0.24746	3.69545	0	0.49492	7.58063	0	1347	>500	11	1
OSTEO	1.54321	1.15741	2.05761	8.74486	5.40123	0	3.85802	0	0	6.17284	0.0643	0.15432	1.44033	0.3858	5.76132	0	0	2.6749	1.44033	1.54321	2.57202	1.88615	5.5727	5.52984	0	2.14335	0	0	4.45816	0.04286	0.4501	2.6406	0.1286	4.8011	0	0	1.81756	0.4801	648	>500	1	1
OSTEO	9.32401	3.20513	8.15851	21.756	2.91375	0	3.39938	0	3.4965	0	0.09712	0.08741	0	0.58275	0	1.74825	5.24476	12.7428	0	6.60451	2.57382	5.43901	12.432	2.52525	0	2.75188	0	2.52525	0.777	0.04856	0	0	0.3885	0	1.554	2.7195	9.75136	0	858	>500	13	1
OSTEO	5.5325	1.38313	7.60719	5.76302	6.74274	0	0.5763	0	1.38313	9.22084	0.05763	0	0	0	4.19548	0	0.69156	1.82112	1.93638	1.38313	1.09497	3.9957	4.59121	3.28492	0	0.67235	0	0	5.68618	0.03842	0	0.32272	0.05763	3.01214	0	0.28815	1.66744	0.32272	1446	>500	1	1
OSTEO	2.73224	0.22768	9.10747	4.55373	1.36612	0	1.89739	0	2.73224	2.12508	0	0	0	0	11.9004	2.27687	0	2.36794	0.85003	1.21433	0.45537	10.0182	4.57903	1.82149	0	2.52985	0	0.91074	3.89597	0.11384	0.03035	0	0	11.7587	0	0.15179	1.31552	0.28334	1098	>500	3	1
OSTEO	1.75285	1.31464	7.88782	23.8095	2.19106	0	0	0	1.31464	18.6971	0.07303	0	0	0	3.27198	0	0.43821	10.634	0.81799	1.16857	0.47472	11.1988	15.094	1.46071	0	0.73035	0	1.31464	11.4909	0.04869	0	0.13633	0	2.72665	0	0.10955	5.24881	0.95432	1141	>500	3	1
OSTEO	2.57069	1.28535	36.4182	23.9931	9.96144	0	1.07112	0.14995	2.89203	16.7095	0.05355	0	1.49957	0.32133	6.89803	0	0.32133	3.04199	0.59982	0.85689	0.64267	26.7781	15.7991	7.76564	0	0.08926	0.04998	3.74893	16.2811	0.01785	0.01071	0.6998	0.10711	3.99886	0	0.40167	1.84947	0.79977	1556	>500	11	1
IPB	0	9	14	26.5	3	1.33333	0	0	2	7.33333	0	0.1	0	0	5.6	0	0	0	0	0	5.5	9.77778	14.3333	2	0.44444	0	1.24444	1.33333	5	0.02777	0	0	0	2.8	0	2	0.62222	0	500	300-500	1	1
IPB	0	1.98791	7.84563	13.9419	2.22646	0	1.85539	1.18745	5.72519	6.36132	0.84817	0.11132	0	0	13.6556	0.31806	0	10.2841	4.74979	0	1.4313	3.67543	7.35086	1.4313	0	2.03209	0.59372	1.69635	2.15578	0.60962	0.09011	0.79163	0	10.687	0.84817	0.07068	7.56291	2.47385	1572	>500	1	1
OSTEO	0	0.32341	10.5649	5.87538	4.52781	0.86244	2.1561	1.20742	0.97024	11.2117	0.1078	0	0.90556	0	14.489	0	0	1.85425	4.82967	0.86244	0.32341	6.18083	4.11456	2.37171	0	0.53902	0.70432	0.1078	8.91189	0.06288	0.07546	0.30185	0	9.05563	0	0	1.57395	2.31422	1546	>500	3	1
OSTEO	1.03306	0.12913	4.13223	13.1715	6.19835	0	1.29132	0	2.58264	7.05923	0	0	0	0.25826	6.26722	0	0.25826	1.44628	7.7135	0	0	2.75482	11.7367	4.47658	0	0.86088	0	1.20523	4.3618	0.04304	0	0	0	4.82094	0	0.08608	0.88383	3.05326	968	>500	3	1
IPB	1.47601	2.58303	13.5301	3.87454	5.16605	0	2.76753	0	3.32103	11.8081	0.15375	0.12915	0	0	0.6888	0	0.5535	4.32964	1.37761	0.492	1.53752	10.4961	4.10004	5.47355	0	2.35752	0	1.47601	8.36408	0.0205	0.09225	0.2296	0.246	1.03321	0	0.39975	2.80443	0.6888	1355	>500	12	1
IPB	0	1.74825	76.9231	104.895	13.986	0	11.655	0	27.972	27.972	0	0	0	0	16.317	0	0	7.45921	6.52681	0	2.331	152.292	239.899	49.5338	0	7.77001	2.1756	37.296	158.508	0.29137	0	1.0878	0	32.634	0	0	21.2898	23.9316	143	<300	12	1
IPB	5.07937	2.38095	5.92593	12.2751	7.93651	0.21164	6.34921	2.96296	3.49206	8.46561	0.92592	0.33333	0.88888	0.31746	14.8148	0.31746	3.1746	5.29101	7.11111	2.53968	2.93651	4.02116	7.67196	4.7619	0	4.05644	0.59259	2.53968	4.65608	0.14991	0.23809	0.39506	0	9.97531	2.96296	0.93474	3.24515	4.93827	1575	>500	1	1
OSTEO	3.24675	0.97402	26.4069	11.2554	6.65584	0	1.08225	0.60606	2.27273	16.8831	0.48701	0.22727	1.81818	0.16233	21.8182	0	4.89719	4.89177	5.45455	2.5974	0.81168	16.4502	5.75397	7.35931	0	0.90187	0	2.5974	10.101	0.27056	0.05411	1.51515	0.05411	12.6263	0	3.30988	2.52525	6.66667	1540	>500	1	1
IPB	1.29032	2.25806	20.4301	8.97849	5.96774	0	3.76344	0.60215	4.19355	11.9355	0.48387	0	0.30107	0	13.5484	0.96774	0	1.50538	2.4086	0.4301	1.50538	14.4086	5.73477	5.32258	0	2.68817	0.7025	3.76344	10.9677	0.1344	0.0215	0.50179	0	9.83513	0.96774	0.21505	1.60573	2.91039	1550	>500	1	1
IPB	1.40252	1.22721	14.7265	6.77887	6.31136	0	0.58438	0.65451	8.06452	9.35016	0.11687	0	0	0	13.4175	0.70126	0.17531	4.11407	3.92707	0.4675	1.34409	10.6748	5.20103	6.19448	0	0.19479	0.87268	3.97382	11.9994	0.06817	0.00584	0.54542	0	8.07231	0.4675	0.17531	2.04924	5.01792	1426	>500	12	1
OSTEO	0	0	4.2061	23.7907	3.94322	0	0	0	9.46372	13.6698	0	0	2.94427	0	5.88854	1.57729	1.57729	8.93796	0	0	0	4.38135	16.0358	5.78339	0	0	0	4.2061	9.20084	0	0.05257	0.98142	0	3.43498	1.57729	0.6572	6.3442	0	634	>500	1	1
OSTEO	3.003	0.25025	14.3477	7.34067	2.5025	0	1.25125	0.46713	4.5045	14.6814	2.46079	0.25025	2.8028	0	5.60561	3.003	0.75075	5.13847	2.33567	0.66733	0.16683	13.9028	5.64453	3.33667	0	0.13902	0.93426	1.16783	12.9018	0.82026	0.10844	0.77855	0.33366	9.49839	1.83517	0.98709	4.59348	3.11423	999	>500	1	1
IPB	0	0	4.70312	9.5532	2.6455	0	0	0.82304	0	0	0	0	0	0	5.76132	0	0	3.29218	1.64609	0	0	2.74348	5.38899	1.76367	0	0	0	0	0	0.07348	0	0	0	1.64609	0	0	2.15559	1.09739	567	>500	12	1
IPB	0.78064	0	13.0107	11.9698	18.345	0	0.65053	0.72859	3.51288	18.7354	0.09758	0	0	0.19516	3.27869	0	3.51288	14.7281	3.64299	0.26021	0.16263	9.10747	6.87397	9.69295	0	0.65053	0.72859	4.42363	11.1458	0.14094	0	0	0.06505	1.57863	0.52042	1.99497	8.0059	1.21433	1281	>500	12	1
IPB	8.80705	1.20096	4.80384	4.60368	2.60208	0	1.3344	0	1.60128	18.6816	0.06672	0.30024	0	0	5.97812	0	0.46704	2.88231	0.74726	4.80384	0.86736	5.69344	5.93808	3.26928	0	0.2224	0	1.06752	14.7674	0.10008	0.10008	0.12454	0	7.3481	0.26688	0.35584	1.99271	0.74726	1249	>500	15	1
IPB	0	2.49036	12.6393	14.2459	4.82005	0	0	0	3.85604	9.21165	0.85689	0.2892	0.29991	0	8.09769	0	0.16066	4.34876	2.99914	0.21422	0.58911	10.14	9.17595	2.1958	0	0.53556	0	3.32048	6.56955	0.0714	0.16066	0.79977	0.21422	6.89803	0	0.37489	1.83519	2.0994	1556	>500	1	1
OSTEO	0	1.57233	8.38574	0	3.14465	0	0	0	0	41.9287	0	0.62893	0	0	5.87002	0	0	0	0	0	0.5241	3.49406	1.39762	1.04822	0	0	0	0	25.1572	0	0	0	0	5.87002	0	0	0	1.95667	159	<300	1	1
IPB	5.12445	1.92167	13.9092	9.94388	4.02635	0	2.44021	0	5.49048	9.76086	0.18301	0.0732	0	0.36603	5.46608	0	0.36603	2.58663	4.09956	0.48804	0.45754	8.29673	7.84936	4.08736	0	0.8134	0	0.97608	10.7369	0.02033	0.0122	0.22775	0.24402	4.78282	0.24402	0.18301	2.19619	1.59427	1366	>500	15	1
OSTEO	0	0.49358	33.8927	70.6647	17.2754	0	0.41131	0	8.8845	11.1879	0.04113	0.04935	1.84271	0	7.37085	0.98716	0	1.84271	8.2922	0	0.16452	25.0082	43.4628	11.2701	0	1.23396	0	7.23922	7.89733	0.06855	0.04113	1.07491	0	3.53186	0.98716	0	0.92135	3.53186	1013	>500	11	1
IPB	2.93902	1.6532	8.08229	8.32721	2.57164	0	2.44918	0	0.73475	10.2866	0	0.16531	1.71443	0.73475	9.94367	0	0.91844	3.35538	0	2.6941	0.27553	5.63311	4.3677	3.55131	0	0.71434	0	2.0818	8.32721	0.03061	0.08572	1.02866	0.30614	7.20059	0	0.62249	1.57564	0	1361	>500	1	1
IPB	0	0	13.1533	19.5569	8.30737	0	0.86535	0	6.23053	16.6148	0.08653	0	0	0	9.93423	0	0	4.81135	3.87677	0	0.17307	8.30737	12.5764	6.57667	0	0.72112	0	5.53825	13.9033	0.08653	0.05192	0	0	6.21899	0	0	2.90758	1.61532	963	>500	1	1
OSTEO	0	1.22017	14.8229	11.4787	8.13449	2.1692	5.87491	2.02458	5.42299	17.3536	0.94902	0.16268	1.01229	0	21.2581	2.7115	0	1.80766	3.03688	1.0846	1.22017	12.8947	7.3813	5.96529	0	3.61533	1.01229	5.60376	14.4613	0.31634	0.0723	3.20559	0	16.7028	1.80766	0.09038	1.51844	2.02458	922	>500	1	1
OSTEO	0	3.20718	17.3188	31.377	5.77293	0	1.87086	0.89801	7.05581	8.12487	0.05345	0.01603	0	0	9.27945	0	0.08017	5.04597	0	0	1.41651	11.7597	22.3612	3.74171	0	0.44544	0.69845	5.45221	5.8442	0.11581	0.00534	0	0	5.38807	0	0.05345	3.22857	0	1559	>500	11	1
OSTEO	0	6.68239	27.7778	10.7442	13.3648	0	0	0	5.50314	36.6876	0	0	0	0	16.1426	0	0	9.53878	2.93501	1.04822	3.27568	19.2173	4.54228	12.0545	0	0.87351	0	4.19287	13.6268	0.04367	0.0262	0	0	11.4955	0	0	6.56883	1.95667	636	>500	12	1
OSTEO	0	0	19.5599	8.65933	1.22249	0	1.52812	0	3.66748	25.2649	0	0	0	0	4.56398	2.44499	0.30562	5.13447	0	0	0.30562	8.69329	3.90519	0.61124	0	0	0	1.62999	15.4849	0.01697	0	0	0	2.47215	2.85249	0.10187	2.85249	0	818	>500	3	1
IPB	2.17628	0.8161	15.9594	16.1407	8.97715	0	2.72035	0	1.08814	13.0577	0.09067	0	1.0156	0	22.3431	0	0	1.95865	1.0156	2.53899	0.54406	10.7605	10.9419	4.71527	0	1.5113	0	1.08814	9.43054	0.2418	0.0544	0.84633	0.18135	14.5569	0	0.09067	2.12792	0	919	>500	1	1
IPB	1.35227	2.19743	20.284	10.2547	4.0568	0	1.40861	0.31552	5.07099	10.8181	0	0.0338	1.26211	0.33806	9.46586	0.67613	0.16903	3.47081	3.15529	2.0284	1.57764	12.546	5.84103	3.43701	0	1.50252	0.21035	4.62024	8.56435	0.03756	0.02253	0	0	4.94328	0.45075	0.22537	2.63692	3.15529	1479	>500	12	1
OSTEO	0.6435	0	28.5285	39.3608	7.56113	0	0	0	6.43501	12.87	0.02681	0.03217	0	0.32175	3.6036	0	0.16087	4.4616	1.5015	0	0	18.0895	20.2345	6.32776	0	0	0.1001	3.75375	9.72401	0.0715	0.04826	0	0	1.7017	0	0.05362	3.48205	1.4014	1554	>500	11	1
OSTEO	6.13874	2.30203	16.7792	16.2165	7.98036	0	0	0	6.75261	20.0532	0.6906	0.1995	0.57294	0	5.72949	0	0	1.24821	1.1459	4.09249	0.97196	9.89018	8.03151	5.37139	0	0.93786	0	4.39943	12.6867	0.48598	0.04092	0	0	3.72417	0	0.12789	0.73664	0.57294	1629	>500	11	1
OSTEO	4.56621	0	3.04414	2.02943	0	0	0	0	0	8.62506	0.12683	0	0	0.76103	2.8412	0	0	0	1.4206	0	0.44393	1.69119	2.19855	0	0	2.11399	0.47353	1.77575	3.88973	0	0	0	0	1.89413	1.52207	0	0.47353	1.89413	657	>500	3	1
IPB	0	0.74228	16.2312	8.80839	6.23515	0	0.49485	0	2.3753	16.2312	0.09897	0	0	0	10.5305	0	0.59382	10.6888	0	0	1.58353	6.59805	3.89285	1.97941	0	1.15466	0	2.57324	6.20216	0.06598	0.00989	0	0	5.35761	0.79176	0.29691	3.14067	1.10847	842	>500	15	1
IPB	0	0	0	2.21852	0	0	0	0	0	0	0	0	0	0	0	0	0	0	0	5.54631	1.80255	15.5297	17.1011	15.6683	0	0	1.29414	2.77316	14.0507	0.36975	0.08319	1.29414	0.27731	8.28249	1.10926	0	3.95637	2.58828	601	>500	12	1
IPB	0	1.11607	0	0	6.69643	0	0	0	4.46429	2.97619	0.74404	0.22321	0	0	0	0	0	1.19048	0	0	0	0	0	4.83631	0	0.62003	0	0	4.96032	0	0	0	0.74404	0	1.4881	0	1.19048	0	224	<300	1	1
OSTEO	0	0.5699	5.31915	1.8997	2.27964	0	0.31661	0.3546	1.51976	2.02634	0	0	0	0	0	0	0.37993	0	0.70921	0	0	0	0	0	0	0	0	0	0	0	0	0	0	0	0	0	0	0	1316	>500	1	1
OSTEO	2.15054	2.15054	10.3943	2.15054	9.94624	0	0.44802	2.00717	1.07527	15.7706	0	0.26881	1.00358	0	12.043	1.07527	0	3.51254	16.0573	0	0.35842	6.09319	1.16487	3.94265	0	0.89605	0.33452	0	5.73477	0.01493	0.12544	1.00358	0	5.01792	0.71684	0	1.07527	7.52688	930	>500	1	1
IPB	9.25069	6.24422	35.461	25.9019	8.78816	0	3.85446	0	10.6383	20.9682	0.19272	0.0925	0.86339	2.31267	28.9238	0.92506	0.23126	1.60345	18.5631	10.4841	3.58464	20.9682	19.6834	6.93802	0	1.28482	0	7.55473	11.8203	0.24411	0.07708	1.439	0.92506	25.758	0.30835	0.15417	2.31267	11.2242	1081	>500	1	1
OSTEO	6.75676	2.74493	7.60135	9.64245	0.42229	0	1.40766	1.57658	0	5.63063	0.14076	0.21114	0.78828	0	3.15315	0.84459	0	6.10923	2.36486	4.78604	1.26689	7.88288	5.67755	0.70382	0	0.70382	1.05105	0.98536	2.06456	0.04692	0.1478	0	0	1.31381	1.97072	0	3.78191	1.57658	1184	>500	1	1
IPB	0	2.04626	10.9134	15.1246	4.27046	0	2.9656	0	5.33808	8.06643	0.05931	0.08896	1.32859	0	1.66074	0	0.88967	4.86358	6.97509	0.47449	1.27521	8.46184	10.5773	4.50771	0	1.87821	0	5.33808	6.16845	0.09885	0.0771	0.99644	0	3.76433	0.83036	0.13839	2.20641	5.42507	1405	>500	12	1
IPB	3.47947	0.17397	9.74252	26.8499	3.65344	0	2.31965	0	4.52331	11.9462	0.08698	0.06958	1.9485	0	4.54651	1.39179	0	14.5906	3.89701	1.85572	0.28995	6.03108	16.4502	3.88541	0	0.48325	0	4.52331	8.08011	0.05799	0.02319	0.433	0	2.3815	0.69589	0	8.48991	2.92276	1437	>500	12	1
IPB	0	0.32258	24.7312	23.0645	11.6129	0	3.22581	1.2043	13.871	29.6774	0.05376	0.03225	0	0	9.03226	0	0	5.11828	4.21505	0.86021	0.56451	15.9857	14.319	7.04301	0	0.80645	0.60215	8.06452	18.3513	0.0448	0.01075	0.30107	0	5.41935	0	0	2.81004	2.4086	1550	>500	12	1
IPB	2.00401	2.63026	18.7041	10.6045	5.26052	0	0.835	4.90982	8.51703	20.0401	0.167	0.0501	3.74081	0.2505	18.7041	0	0.501	3.30661	14.0281	2.00401	2.29626	11.69	6.23469	3.34001	0	0.835	1.24694	5.01002	12.0241	0.18091	0.0668	2.49388	0	11.0666	1.67001	0.47316	3.58495	8.72857	998	>500	1	1
IPB	0	1.47783	13.1363	11.4942	8.867	0	0.82101	0	5.91133	21.0181	0.04105	0	4.5977	0	0.91954	0	0	7.81609	3.67816	0	0.98522	7.99124	5.25452	4.84401	0	0.13683	0	5.41872	18.3361	0.02736	0	2.60536	0	3.67816	0	0.10946	4.81664	2.45211	1015	>500	12	1
OSTEO	0	0	0	0	0	0	0	0	0	0	0	0	0	0	0	0	0	0	0	0	0	0	0	0	0	0	0	0	0	0	0	0	0	0	0	0	0	0	1576	>500	1	1
OSTEO	2.70636	0.50744	18.4935	3.04465	14.0392	0	2.81912	0	4.73613	13.9829	0.02819	0	0	0	11.6824	0	0	7.62291	1.57871	1.35318	0.39467	13.9077	3.49571	11.1074	0	1.03368	0	3.83401	13.8325	0.01879	0.02819	0.21049	0.11276	9.36701	0	0	5.59314	0.94722	1478	>500	12	1
OSTEO	0.77519	1.16279	33.3333	21.5116	14.7287	0	3.22997	0	5.42636	17.5711	0.32299	0	0	0.38759	6.51163	0	9.75452	7.49354	1.44703	0	0.58139	14.8148	11.6279	8.39793	0.17226	0.86132	0.36175	2.45478	15.8484	0.16149	0	0.12058	0.25839	4.58226	0.25839	0.92592	3.3764	1.08527	1290	>500	11	1
OSTEO	4.55581	0.7593	23.5383	13.6674	10.6302	0	1.58188	2.12604	6.07441	12.9081	0.03163	0.07593	0.70868	0.7593	10.9846	1.5186	0	5.89724	0.70868	2.2779	0.5062	9.95529	4.59799	3.85978	0.16873	0.42183	1.18114	2.0248	6.11659	0.08436	0.03163	0.47245	0.12655	5.31511	1.89825	0	2.10073	0.47245	1317	>500	15	1
OSTEO	0	0	7.61905	13.3333	0.71428	0	1.78571	0	1.42857	0	0	0	0	0	13.3333	0.71428	0	59.0952	21.3333	0.95238	0.11904	7.30159	11.7857	0.11904	0	1.5873	0	1.66667	0	0.03968	0	0	0	10.4444	0	0	37.9841	10.8889	700	>500	1	1
IPB	4.19874	0.17494	12.1297	12.5962	8.04759	0	2.33263	0	6.29811	13.9958	0	0.08747	0	1.74948	7.18451	0	0.17494	1.63284	2.61255	0.23326	0.43736	8.08646	11.3327	7.17285	0	1.06912	0	4.66527	13.8792	0.05831	0.02332	0	0.46652	5.44281	0.23326	0.71922	1.57064	0.87084	1429	>500	15	1
OSTEO	4.54841	4.62963	21.2259	45.5382	8.2846	0	0.27073	0	8.44704	10.8295	0.16244	0.19493	0	0.32488	13.9484	0	0.16244	7.66732	0	2.16591	2.24713	14.2228	24.186	6.49773	0	0.18049	0	8.77193	7.94166	0.07219	0.0758	0	0	7.78283	0	0.05414	4.75056	0.10107	1539	>500	11	1
IPB	2.12615	0.35435	16.3005	23.0333	5.1382	0	2.95299	0	5.31538	17.9542	0.17717	0.08858	0	0	5.62249	0.70871	0.82683	3.96882	1.32294	0.70871	0.32482	7.87464	13.4459	3.48453	0	2.16552	0	2.95299	11.182	0.16733	0.05905	0.44097	0	4.85078	0.59059	0.67918	1.65367	1.10245	1411	>500	15	1
IPB	0	1.13327	6.64853	6.19523	2.03989	0	0.37775	0	3.17316	7.25295	0	0.09066	0	0.4533	2.96162	0	0.22665	7.85736	0.84617	0	0.26443	6.85001	3.97905	0.60441	0	0.25183	0	0.75551	3.62647	0.07555	0	0	0.3022	3.10265	0	0.26443	5.38934	0.9872	1103	>500	1	1
IPB	5.70704	1.98161	19.0235	16.2756	3.48763	0	2.64215	0	2.85352	19.2348	0.15852	0.14267	1.18368	0	15.3879	1.90235	1.58529	3.65673	6.80617	3.17058	0.92475	13.246	10.6038	2.32509	0	1.14493	0	1.4796	8.17304	0.06165	0.05284	1.38096	0	10.5545	0.63411	0.26421	2.19827	4.53745	1577	>500	1	1
IPB	4.13508	5.16885	20.6754	26.8206	9.30393	0	1.72295	0	3.4459	7.46612	0.3733	0.15506	0	1.72295	7.07558	0	0	5.14588	0.64323	4.13508	4.39352	16.4637	17.2295	5.74317	0	0.76575	0	3.21617	3.7522	0.42116	0.06317	0	1.03377	4.82426	0	0.05743	4.31886	0	1451	>500	1	1
IPB	1.33245	0.99933	14.2127	9.49367	5.996	0.44414	0.55518	0	1.99867	14.2127	0.05551	0.03331	0	0.33311	3.73085	0	0	1.64335	1.24362	0	0.6107	10.2154	6.47716	3.38663	0	0	0	0.44414	7.55052	0	0.0111	0.6218	0	1.86542	0	0	1.70257	1.03635	1501	>500	12	1
OSTEO	0	0.89401	18.6389	14.4668	23.8947	0	0.54182	0	2.27568	21.2397	0	0.09752	0.60684	0.32509	4.55137	0.65019	0.08127	5.39662	1.82055	0.86692	0.67728	16.1826	11.9744	16.6342	0	0.90304	0	5.09319	15.0267	0.06321	0.04334	0.20228	0	1.41598	1.08366	0.05418	3.38101	0.60684	1538	>500	11	1
IPB	6.55738	0.81967	11.4754	3.27869	3.27869	0	1.36612	0	2.45902	21.8579	0	0.08196	0	0.81967	9.18033	4.91803	0	0.21857	0	3.27869	0.54644	8.92532	2.73224	1.22951	0	1.13843	0	1.91257	10.5647	0.02276	0.01366	0	0	4.59016	1.0929	0.72859	0.67395	1.02004	610	>500	1	1
OSTEO	13.2743	0	13.2743	0	0	0	0	0	6.63717	0	0	0	0	0	4.12979	0	0	2.0649	0	7.37463	1.47493	2.94985	0.98328	0	0	1.84366	0	2.21239	0	0	0	0	0	1.3766	0	0	0	0	226	<300	12	1
IPB	0	0.57077	4.56621	9.89346	2.28311	0	0	0	0	6.08828	0	0	1.06545	0	4.2618	0	0	2.1309	0	0	0.38051	1.77575	9.19584	0	0	0.63419	0	0	4.05885	0.19025	0.05707	0	0	2.48605	0	1.01471	2.1309	0	438	300-500	15	1
IPB	1.96078	0	28.7582	7.84314	7.84314	0	0	0	5.88235	26.1438	0	0	0	0	1.83007	0	2.94118	7.12418	1.83007	1.96078	0.16339	18.7364	2.28758	8.16993	0	0.54466	0	5.22876	21.7865	0	0.03267	0	0.98039	2.44009	0	1.14379	4.74946	2.13508	510	>500	12	1
IPB	1.27065	0.79415	15.6713	5.40025	5.87675	0	1.05887	0.59296	8.57687	27.5307	1.27065	0.19059	0	0	6.52266	0	0.31766	5.59085	5.92969	0	0.31766	13.836	4.62375	2.64718	0	1.58831	0.98828	4.12961	10.4475	0.95298	0.0847	0	0	6.47325	0.21177	0.38825	2.87308	4.5461	1574	>500	1	1
IPB	1.52555	2.57437	17.5439	12.8401	7.43707	0	2.54259	1.42385	6.10221	15.2555	0.15891	0	0.71192	0	3.55962	0	0	3.86473	6.40732	0	0.95347	14.9165	10.6365	7.5642	0	1.69506	0.47461	6.10221	15.2555	0.01059	0.01271	0.47461	0	2.72904	0.63564	0	3.44097	3.91559	1311	>500	12	1
IPB	2.72109	1.02041	18.1406	13.7755	7.82313	0.45351	2.26757	1.26984	9.86395	33.1066	0.39682	0.10204	0.95238	0.17006	9.52381	0.34013	0.68027	4.71655	13.9682	3.85488	2.09751	12.0937	9.5805	6.23583	0	3.02343	0.21164	6.12245	19.9547	0.27399	0.04535	1.5873	0	4.33862	1.5873	0	2.81935	6.45503	1470	>500	12	1
IPB	1.26823	1.90235	17.5439	19.7104	7.45086	0	7.39801	0	4.12175	21.9827	0.21137	0.11097	2.36736	0.47558	5.91841	0	0.21137	2.91693	3.25513	1.69097	0.89833	13.4573	12.9465	4.75587	0.14091	7.7503	0	2.43078	10.78	0.07045	0.06869	1.67688	0	5.32657	0	0.20256	2.69147	1.38096	1577	>500	1	1
OSTEO	1.5528	1.26165	8.54037	8.15217	2.32919	0	1.94099	0	3.49379	3.10559	0.06469	0	0.72463	0	4.34783	0.77639	0.09704	7.3499	7.97101	1.0352	0.38819	7.85024	5.39165	1.68219	0	0.53916	0	3.23499	2.24293	0.07548	0.01293	1.08696	0.06469	2.89855	0.25879	0.34506	4.7274	3.01932	1288	>500	13	1
IPB	1.04712	1.04712	12.2164	4.53752	5.2356	0	0	0	4.71204	10.8202	0	0	0.97731	1.04712	0.97731	0	1.04712	4.11867	0.97731	0	0.61082	8.14427	5.4683	2.96684	0	0.14543	0	1.7452	6.86446	0.01454	0	0.16288	1.04712	0.97731	0	0.69808	3.88598	0.97731	955	>500	12	1
IPB	3.11203	3.37137	34.5782	13.6584	17.6349	0	0.86445	0	3.11203	8.29876	0.08644	0.20746	0	0	16.4592	1.03734	0.51867	4.84094	1.93638	2.42047	1.12379	19.479	9.42254	8.64454	0	1.44076	0	3.11203	6.91563	0.10085	0.0778	0.32272	0	7.90687	1.03734	0.17289	4.28769	0.96818	964	>500	1	1
IPB	0	1.92967	14.8656	25.0143	9.21955	0	0.71469	1.60091	6.00343	5.71755	0.2144	0.12864	2.8016	0	25.6146	0	0.28587	2.00114	4.00229	0	0.96483	8.09987	15.7471	4.78845	0	1.07204	0.66704	2.14408	5.71755	0.14293	0.02858	1.06728	0	11.74	0	0.14293	0.93386	2.8016	1166	>500	1	1
OSTEO	0	0	0	0	17.5439	0	0	0	0	0	0	0	0	0	0	0	0	0	0	0	0	3.89864	26.8031	5.84795	0	0	0	0	7.79727	0	0	0	0	2.72904	0	0	5.26316	5.45809	57	<300	12	1
IPB	0	0.63291	11.8143	10.2321	8.06962	0	2.63713	0	4.43038	11.8143	0.13185	0.06329	0.59071	0.63291	7.38397	0.63291	1.23945	4.19831	1.18143	0.42194	0.65928	11.1111	10.3727	4.32489	0	1.23066	0	2.63713	4.71167	0.09669	0.05274	0.09845	0.42194	5.61181	0.84388	0.545	3.13643	0.78762	1580	>500	11	1
IPB	0	3.66604	20.4983	14.8218	5.43992	0	2.36518	0	7.56859	3.7843	0.03941	0.42573	2.20751	0	10.596	0	0	3.53201	9.27152	0.31535	2.83822	16.3986	10.2491	7.48975	0	3.94197	0.58866	5.36108	4.62525	0.18395	0.22863	2.79617	0	6.62252	0.31535	0.21023	3.23767	7.21118	1057	>500	12	1
IPB	0	2.74206	11.8507	16.5784	2.08018	0	2.83661	1.059	4.91679	10.0857	1.13464	0.11346	0.353	0	11.1195	0	0.1891	7.41301	1.412	0	0.75642	7.73239	8.36275	1.63893	0	0.73541	1.17667	3.65608	11.0943	0.5358	0.05673	0.94133	0	8.00134	0	0.12607	4.23601	1.059	1322	>500	1	1
IPB	19.7694	3.29489	5.49149	24.849	7.41351	0	2.05931	1.53762	0	19.7694	0	0.5766	0	2.88303	3.07523	0	0	6.15047	0	7.13893	2.05931	2.56269	12.5847	4.66776	0	3.66099	0.51253	0.82372	9.15248	0	0.20593	0	1.64745	5.8942	0	0	3.88065	0	607	>500	15	1
IPB	2.28659	0.38109	16.2602	5.20833	8.76524	0	2.22307	0	4.19207	8.63821	0.12703	0.07621	0.71138	0	3.20122	0	1.14329	2.84553	0	0.25406	0.73043	11.5176	3.49339	5.52591	0	1.16446	0	3.42988	3.72629	0.05293	0.0127	0.71138	0.06351	1.65989	0.63516	0.09527	2.48984	0	1312	>500	1	1
OSTEO	2.78552	1.39276	12.7669	10.2136	7.48607	0	1.74095	0	3.48189	13.4633	0.23212	0	0	0	6.987	0	0.9285	1.29991	0	0.9285	1.91504	8.43392	9.1303	5.10678	0	0.77375	0	2.90158	9.59455	0.18376	0	0	0.29015	5.0913	0.34818	0.3095	0.64995	0.4333	1436	>500	13	1
OSTEO	1.87441	5.85754	7.81006	5.38894	1.40581	0	1.95251	0	1.87441	4.06123	0.2343	0	2.18682	1.40581	0.87472	0	0	0.87472	1.74945	0.9372	2.69447	4.47777	3.93106	0.9372	0	0.52067	0	1.24961	3.69676	0.09111	0.00781	0.43736	1.32771	0.14578	0	0.28636	1.60367	1.02051	1067	>500	1	1
IPB	0	0.39968	7.19424	6.52811	3.9968	0	0	0	1.59872	18.6517	0	0.1199	0	0.79936	7.4607	0	0	5.80869	2.23821	0	0	5.59552	9.01501	5.92859	0	0	0	1.73195	8.17124	0.0444	0.05329	0	0.39968	5.34683	0	0	3.4106	2.36255	1251	>500	11	1
IPB	3.80952	0.31746	12.9101	9.89418	6.03175	0.21164	1.0582	0	2.53968	5.07937	0.34391	0.12698	0.59259	0	5.92593	0.95238	0.47619	3.55556	1.77778	5.29101	0.89947	21.2346	12.575	7.30159	0.21164	0.88183	0	2.75132	7.47795	0.37918	0.13756	4.34568	0	11.7531	2.32804	0.34391	3.08995	5.92593	1575	>500	1	1
IPB	0	0	19.0476	0	0	0	0	0	0	0	0	0	0	0	0	0	0	0	0	0	0	31.746	0	0	0	0	0	0	0	0	0	0	0	0	0	0	0	0	35	<300	13	1
IPB	0	1.52542	22.1469	8.92655	5.9322	0	3.9548	0	3.05085	10.3955	0.16949	0.08474	1.26554	0	8.85876	1.35593	0.50847	1.9887	6.96045	0	0.73446	15.3672	6.32768	4.18079	0	2.35405	0	3.16384	4.36911	0.10357	0.02824	1.05461	0	5.80038	0.90395	0	2.04896	3.69115	1475	>500	1	1
OSTEO	0	0.51055	11.7994	8.67937	5.44588	0	0	0	0.68073	25.8679	0.08509	0	0.63535	0	13.5013	0	0	4.76515	2.54141	0	0.22691	10.0597	7.46918	3.8575	0	0.18909	0	2.8364	15.6191	0.05672	0	0.84713	0	8.47137	0	0.30254	3.02549	1.48249	1469	>500	3	1
OSTEO	3.97614	0.49701	11.0448	13.6956	4.97018	0	0.55224	0	1.98807	9.27767	0.02761	0.03313	1.54628	0	4.94809	0	0.99403	4.2854	1.54628	3.09256	0.27612	9.1304	8.17318	4.58361	0	0.64428	0.41234	2.54031	5.59605	0.09204	0.02208	0	0	4.43266	0	0.11044	3.38708	1.85553	1509	>500	1	1
IPB	6.34921	1.5873	11.6402	7.87037	2.77778	0	1.98413	2.59259	1.5873	3.1746	0	0.19841	1.48148	0	42.963	0	1.25661	2.75132	6.66667	3.43915	0.99206	9.87654	4.7619	1.5873	0	1.98413	1.35802	0.79365	3.88007	0.07716	0.11904	0.74074	0.06613	27.5309	0.26455	0.66137	2.89242	3.95062	1260	>500	1	1
OSTEO	0	1.06838	8.54701	39.1738	5.34188	0	7.12251	0	0	5.69801	0	0	0	8.54701	7.97721	21.3675	4.45157	0	3.9886	2.849	0.89031	8.54701	18.0437	8.54701	0	4.74834	0	2.13675	0.94966	0.59354	0	0	0.35612	11.301	12.1083	1.4245	0	1.9943	234	<300	13	1
IPB	3.18471	0.8957	9.81953	5.77229	0.79617	0	3.98089	0	3.5828	3.31741	0.49761	0.17914	0.74309	0	5.9448	0	0.39808	2.60085	3.7155	2.12314	0.86252	5.04246	3.98089	1.32696	0	1.76929	0	2.25584	2.38854	0.12163	0.01326	0.74309	0	3.59165	0	0.26539	1.4862	1.9816	1256	>500	1	1
IPB	1.84843	3.23475	10.1664	16.4818	9.70425	0	3.85089	1.7252	4.62107	16.6359	0.50061	0.32347	3.4504	0.4621	11.6451	0	0	12.1688	3.4504	0	0.92421	8.72869	11.527	5.54529	0	2.56726	0.71883	1.84843	7.18833	0.16687	0.21565	0.8626	0.30807	8.48223	0	0	8.91353	4.02547	1082	>500	1	1
OSTEO	0	3.89136	6.77679	4.81787	0	0	4.76493	0	1.27065	4.65904	0.15883	0.04764	0	0.15883	4.74375	0	0.63532	16.9208	0.59296	0.84709	2.40894	5.71792	3.49428	0	0	3.3531	0	0.74121	0.70591	0.03529	0.06882	0	0	7.21446	0	0.74121	11.2099	0.88945	1574	>500	1	1
OSTEO	5.62588	1.58228	14.5335	13.7717	8.43882	0	0.58602	2.62541	3.16456	8.20441	0.1758	0.14064	7.54805	0	11.158	0	0	2.60197	4.59447	2.1097	0.58602	8.04813	7.18862	4.16081	0	0.39068	0.87513	2.57853	5.00078	0.18557	0.01758	4.92264	0	5.90717	0	0.62509	1.53149	3.93812	1422	>500	1	1
OSTEO	5.50459	2.06422	6.72783	8.10398	7.11009	0	0.76452	0	5.50459	12.844	0.07645	0.3211	0	0	6.85015	0	0.22935	8.99083	3.42508	3.0581	1.14679	5.60652	5.55556	3.97554	0	1.01937	0	3.82263	6.67686	0.1529	0.18348	0	0	4.70948	0	0.1529	4.60754	1.71254	1090	>500	1	1
IPB	1.35227	0.84516	8.11359	8.90241	3.0426	0	1.12689	0	1.35227	11.0435	0.08451	0	0	0	6.31057	0.33806	0	1.28465	0	0	0.53527	9.46586	7.11817	3.15529	0	1.50252	0	2.70453	8.07603	0.24415	0.02817	0.63105	0	5.67951	2.25378	0	1.05176	0.8414	1479	>500	1	1
OSTEO	5.68586	1.77683	15.1623	19.249	6.75195	0	1.18455	0	7.46269	0.94764	0.05922	0	0.66334	0.35536	1.65837	0	0	0.99502	1.65837	1.89529	1.12533	11.7666	14.57	5.44895	0	1.18455	0	4.85667	0.7897	0.03948	0	0.44223	0.29613	1.43726	0	0	1.56361	0.99502	1407	>500	1	1
OSTEO	0	2.32558	16.2791	7.17054	2.90698	0	0	0	1.16279	3.87597	0.09689	0	0	0	2.17054	0	3.92442	0.54263	0	1.55039	2.03488	10.3359	3.90827	3.87597	0	1.29199	0	0.38759	3.10078	0.03229	0	0	0.38759	3.61757	0	2.18023	0.90439	0	860	>500	13	1
IPB	7.60938	1.1097	16.487	11.3612	12.3652	0	1.58529	0.59184	7.60938	16.9097	0.3699	0.22194	1.77552	0	23.6736	1.26823	0.47558	8.4126	3.55105	3.38195	1.05686	11.6959	7.06334	7.92644	0	1.58529	0.59184	4.22744	14.0915	0.20256	0.15852	0.19728	0	12.6259	0.42274	0.26421	5.97478	1.9728	1577	>500	1	1
OSTEO	0	0	9.48992	26.8881	2.9656	0	2.47133	0	1.18624	3.16331	0	0	0.55357	0	1.66074	0	0	0	1.10716	0	0	10.4125	15.7506	1.87821	0	0.32951	0	0.98853	2.10887	0.01647	0.00988	0.36905	0	3.32147	0	0.18123	0.18452	1.10716	843	>500	11	1
IPB	1.68919	0.42229	5.91216	3.80068	2.11149	0	0	0	0.84459	12.3874	0.07038	0.04222	0	0	0.78828	0	0.63344	3.26577	7.88288	1.68919	0.49268	5.63063	4.55143	2.11149	0	0	0	1.54842	11.0736	0	0.0563	0	0	0.39414	0.84459	0.21114	3.09685	5.25526	1184	>500	3	1
IPB	0	0.49212	12.6859	11.1002	4.59318	0	3.82765	0	2.62467	17.2791	0	0.08202	0	0.32808	18.9851	0	0.16404	13.2983	2.44969	0.43744	0.38276	7.94692	7.87402	2.46063	0	2.82517	0	2.07787	12.4307	0.02734	0.02734	0	0.10936	13.7795	0	0.10936	8.66871	1.93934	1524	>500	15	1
OSTEO	1.31839	1.15359	15.8207	23.0169	6.59196	0	0	0.30762	1.97759	15.3812	0.05493	0.04943	0	0	6.76774	0	0	1.84575	3.38387	1.53812	0.21973	12.598	8.73434	3.18611	0	0.73243	0.41016	1.20853	8.78928	0.05493	0.08789	0.41016	0	5.22962	0.43946	0	1.42093	1.84575	1517	>500	3	1
OSTEO	0	0	23.6364	18.4091	8.18182	0	1.13636	0	7.27273	6.06061	0	0.02272	0	1.36364	4.24242	1.81818	0	1.63636	0	0.60606	0.15151	17.3737	14.2677	3.78788	0	0.12626	0	5.15152	3.43434	0.02525	0.02272	0.28282	0.60606	1.55556	0.90909	0.60606	1.18182	0	1100	>500	11	1
OSTEO	0	0.34246	25.5708	5.25114	5.47945	0	0	0	6.84932	16.4384	0.22831	0	1.27854	0	21.7352	0	0	7.67123	5.11416	0.91324	0.11415	15.8295	4.03349	6.621	0	0	0	5.02283	8.52359	0.0761	0.04566	0.85235	0	11.5069	0.45662	0	5.32725	5.11416	365	300-500	15	1
IPB	0.68823	1.03235	5.96467	9.74994	3.44116	0	3.72792	0	2.75292	6.07938	0.43014	0.10323	0.64234	0	6.74467	0.68823	0.43014	5.16173	3.85409	1.37646	0.77426	4.89409	5.86908	3.61321	0	1.72058	0.42823	1.49117	6.72937	0.20073	0.05161	0.53529	0.1147	4.49644	0.57352	0.30588	3.05881	0.85646	1453	>500	1	1
IPB	0	0.78369	16.7189	25.6008	8.62069	0	5.22466	0	7.83699	16.7189	0.39184	0.07836	2.92581	0	29.2581	0	0.78369	0.41797	0	0	0.39184	17.938	11.9732	7.05329	0	1.08847	0	8.35946	13.2358	0.21769	0.02612	0.48763	0	16.5796	0	0	0.66179	1.4629	638	>500	1	1
OSTEO	0	0.42087	23.8496	30.0926	8.83838	0	1.05219	1.57127	8.41751	13.7486	0.07014	0.25252	0	0	3.14254	5.89226	0	2.80584	3.14254	0	0.14029	11.691	15.853	4.48934	0	0.46763	1.04751	3.367	9.7269	0.03507	0.07014	0.52375	0	3.40441	2.80584	0.18705	1.12233	3.14254	1188	>500	3	1
IPB	0	0.63211	18.7526	14.4859	4.42478	0	0	0.58997	10.1138	17.6991	0.13168	0	0.58997	0	6.78466	3.79267	0.57943	4.57227	4.71976	0.2107	0.31605	12.6422	11.4307	3.84534	0	0.35117	0.19665	4.63548	11.378	0.19314	0.02107	1.27827	0.10535	6.19469	3.16056	0.29849	3.66625	0.98328	1582	>500	3	1
IPB	0	0.27964	17.1514	14.0442	3.91499	0.49714	1.55357	1.044	2.98285	7.95426	0.09321	0.07457	1.392	0.18642	4.17599	0	0.09321	3.43028	0.34799	0.24857	0.99428	13.7543	15.37	6.21427	0.16571	2.17499	0.11599	2.48571	8.61712	0.07249	0.09942	0.23199	0.18642	3.94399	0	0.39357	3.27285	1.624	1341	>500	11	1
IPB	0	7.7821	0	14.2672	1.94553	0	1.62127	0	0	5.18807	0	0	0	0	7.26329	0	0	7.393	0	3.89105	3.89105	2.59403	12.4297	0.32425	0	1.62127	0	0	3.45871	0	0	0	0	5.44747	0	0	3.50195	0	257	<300	11	1
IPB	4.45293	0.31806	22.2646	7.52757	8.26972	0	0.53011	1.18745	2.54453	25.8694	0.21204	0.06361	0.89058	0.31806	2.07803	1.9084	0.37107	2.07803	1.78117	3.18066	1.06022	22.3353	6.32598	4.50594	0	1.14857	0.39581	4.24088	13.7122	0.09718	0.0318	0.89058	0	2.67176	0.84817	0.07951	1.80944	1.78117	1572	>500	15	1
IPB	2.12314	1.68082	10.6157	11.4414	6.72328	0.94361	1.76929	2.9724	3.89243	9.908	0.41283	0.21231	0.99079	0.35385	23.1187	2.12314	0.4718	1.60415	7.59613	0.94361	0.41283	6.7626	5.89762	3.42062	0.15726	1.4744	1.65133	2.94881	5.97625	0.4718	0.10615	0.99079	0	12.8804	3.30267	0.15726	0.51899	3.52284	1413	>500	1	1
OSTEO	1.26984	2.06349	16.0847	9.84127	6.03175	0	1.5873	0	5.07937	9.52381	0.26455	0.06349	0.59259	0.95238	6.81481	1.26984	0.47619	0	0	0.21164	1.16402	10.2998	6.56085	4.07407	0	1.76367	0	4.2328	6.56085	0.11463	0.02116	0.59259	0.21164	4.34568	0.63492	0.21164	0.08465	0	1575	>500	1	1
IPB	0	2.6252	5.38503	3.76952	8.07754	0	2.69251	0	4.84653	5.38503	0	0.08077	1.50781	0	16.5859	0.80775	0	1.50781	3.01562	0	0.5385	5.38503	3.76952	3.63489	0.1795	0.8975	0.5026	2.42326	3.59002	0.33656	0	1.50781	0	10.806	0	0	1.77706	5.02603	619	>500	1	1
OSTEO	0	0	0	0	0	0	0	0	0	0	0	0	0	0	0	0	0	0	0	0	0	9.25926	0	0	0	0	0	0	0	0	0	0	0	0	0	0	0	0	12	<300	13	1
IPB	3.72093	1.62791	22.3256	8.13953	2.7907	0	0.77519	0	7.44186	16.124	0.31007	0.11627	0.86821	0.69767	6.07752	0.93023	0.46511	2.17054	1.73643	3.41085	1.08527	14.0569	3.85013	2.0155	0	0.51679	0	6.04651	6.82171	0.12919	0.07751	1.30233	0.62015	2.45995	1.55039	0	1.01292	1.88114	1075	>500	3	1
OSTEO	0	0.69832	1.8622	5.58659	5.58659	0	4.65549	0	1.39665	3.72439	0	0	0	0	0	0	0	5.40037	0	0	2.44413	1.8622	2.7933	3.72439	0	2.7157	0	0	5.58659	0.15518	0.13966	1.73805	0	3.4761	0	0	3.72439	2.60708	358	300-500	13	1
OSTEO	1.45033	1.08774	14.745	20.0024	9.42712	0	1.20861	0	4.35098	26.5893	0.48344	0.19941	1.35364	0.72516	12.1827	1.81291	0.48344	4.61687	0.67681	2.65893	0.72516	9.26597	10.394	5.74088	0	0.6043	0	3.14237	14.9061	0.10071	0.13294	0.2256	0.36258	6.31698	0.96688	0	3.53718	0.45121	1379	>500	1	1
IPB	0	1.03627	7.59931	1.98618	3.10881	0	0.86355	0	4.14508	5.52677	0.94991	0.10362	0	0	5.80311	0	0	0.69084	2.90155	0	0.17271	6.56304	1.46805	2.59067	0	0	0	4.14508	3.68451	0.34542	0.03454	0	0	5.64191	0	0	0.43753	1.28958	965	>500	13	1
IPB	0.81234	1.6247	23.0165	19.3609	8.52965	0	1.01543	0	5.68643	15.4346	0.30463	0.06092	0	0	13.2683	1.6247	0	8.90875	2.27457	0	0.60926	16.6983	14.7125	3.99404	0	0.78978	0	5.55104	10.019	0.11282	0.05415	0.75819	0.13539	8.08737	1.4893	0.20308	4.96435	1.76911	1231	>500	1	1
OSTEO	0	1.84211	16.8421	17.8947	3.15789	0	1.75439	0	4.73684	4.21053	0	0	0	0	2.94737	0	0	0.63157	0	0	0.78947	12.9825	11.6082	2.98246	0	1.75439	0	0.70175	2.80702	0.02923	0.03508	0.16374	0	3.11111	0.17543	0	0.49122	0	950	>500	13	1
OSTEO	2.21402	1.66052	8.11808	13.2226	5.16605	0	0.9225	0	1.47601	13.7761	0.0615	0.1107	0.6888	0	4.47724	0	1.10701	4.92005	4.82165	1.23001	0.615	4.10004	8.09758	4.18204	0	1.43501	0	2.46002	10.6601	0.0615	0.1107	0	0.123	2.87003	0.738	0.246	2.12382	4.13284	1355	>500	3	1
OSTEO	0	1.47059	12.4183	7.59804	2.69608	0	0.40849	0	1.96078	5.22876	0.08169	0.09803	0	0	9.60784	0	0	5.98039	1.83007	0.98039	0.57189	10.7843	7.67974	4.00327	0	2.04248	0	2.12418	9.80392	0.05446	0.06535	0	0.49019	9.30283	0	0	3.94336	0.76252	1020	>500	3	1
IPB	6.02813	1.17214	21.4334	16.0192	8.7073	0	3.34896	0	3.34896	10.2701	0.19535	0.03348	3.43827	0.33489	8.43938	4.01875	0	1.27261	5.93883	0	0.33489	11.6097	11.5539	5.86068	0	1.20935	0	4.57691	6.54908	0.41862	0.01116	2.81313	0.11163	5.2095	4.01875	0.22326	1.02701	5.62626	1493	>500	1	1
OSTEO	1.42857	1.25	16.1905	11.6071	5	0	0.89285	0.66666	2.5	1.30952	0.625	0.08928	1.33333	0	12	3.21429	0.47619	4.90476	2	1.19048	1.22024	9.60317	7.10317	2.02381	0	1.38889	0.88888	1.19048	6.50794	0.11904	0.08928	0.88888	0	8	3.09524	0.68452	3.30159	3.11111	1400	>500	3	1
OSTEO	5.56328	0	6.4905	7.07	4.86787	0	0	0	4.86787	4.63607	0	0	1.2981	0.69541	0	0	0.3477	2.31803	0	0	0	4.327	5.06104	2.78164	0	0	0	2.78164	5.56328	0.01931	0	0.21634	0.69541	0.64904	0	0.4636	1.94715	0	719	>500	11	1
IPB	2.84091	0.11837	6.62879	17.9924	2.84091	0	0	0	2.36742	5.68182	0.23674	0	0.88383	0	0	0	0.47348	1.26263	0.88383	1.26263	0.15782	8.41751	16.6772	3.15657	0	0	0	2.36742	3.78788	0.0526	0.03156	0.29461	0.15782	0.29461	0.15782	0.23674	0.71548	1.03114	1056	>500	1	1
OSTEO	3.2077	0.40096	12.0289	7.48463	17.6423	0	2.00481	0	1.60385	1.06923	0.06682	0.04009	1.12269	2.80674	4.49078	0	0	4.97193	3.74231	1.87116	0.43437	6.68271	3.69776	11.8284	0	0.66827	0	0.80192	4.81155	0.02227	0	0.24948	0.86875	1.62167	0	0	2.49488	1.49693	1247	>500	3	1
IPB	2.55265	1.03701	15.1032	15.7945	5.42438	0	2.12721	0	1.91449	10.2106	0.10636	0.01595	0	0.7977	4.76494	0	0	3.6588	0	1.27632	0.47862	9.85606	11.5046	5.1053	0	1.24087	0	2.02085	6.38162	0.12408	0.01063	0.19853	0.2659	4.36786	0	0.05318	3.14827	1.19124	1567	>500	15	1
OSTEO	1.27226	1.74936	9.96607	5.51315	3.81679	0	0	0	4.13486	15.6913	0.15903	0.0159	0	0.15903	2.37489	0	0.29156	1.35708	2.37489	0.84817	0.87468	6.0786	4.68264	1.27226	0	0.08835	0	2.33249	10.6022	0.11485	0	0.1979	0.26505	0.79163	0	0	1.18745	0.59372	1572	>500	3	1
OSTEO	0	0	15.748	4.72441	0.7874	0	2.62467	0	11.0236	1.04987	0	0	0	1.5748	4.40945	0	0	0.7349	0	3.14961	0	5.07437	2.09974	0	0	1.31234	0	4.46194	2.09974	0.04374	0	0	1.04987	2.93963	0	0	0	0	635	>500	3	1
IPB	2.85103	1.60371	12.5921	6.89	4.45474	0	1.48491	0	1.42552	7.12758	0.32668	0.05345	0.33262	0.71275	15.6332	1.06914	0.35637	1.33048	3.32621	1.90069	1.21763	8.39471	4.27655	4.33595	0	1.7819	0	0.95034	5.93965	0.19798	0.07127	0.88698	0.11879	10.0895	0.47517	0.17818	0.11087	3.88057	1403	>500	1	1
IPB	3.69004	1.84502	11.0701	12.2386	5.16605	0	5.22755	0.6888	6.64207	16.7282	0.46125	0.1476	3.78844	0	11.7097	3.32103	4.02829	6.39606	4.82165	3.44403	0.64575	7.95408	8.77409	2.52153	0	3.28003	0.1148	5.65806	10.9061	0.41	0.0984	1.60722	0.123	6.42886	0.492	0.78925	4.26404	4.01804	1355	>500	1	1
OSTEO	3.32889	1.66445	17.976	3.16245	4.99334	0	0	0	1.66445	11.984	0.16644	0	0	0	11.1851	0.66577	0.33288	3.41767	5.59254	0.44385	0.99866	12.7978	2.7001	3.32889	0	0	0	1.88637	6.50984	0.15719	0	0.20713	0	7.35316	0.66577	0.05548	1.67184	2.17488	1502	>500	3	1
OSTEO	4.28725	1.07181	16.7917	12.1472	4.82315	0	0	0	0	0	0.08931	0.05359	0	0.5359	7.0025	0	0.80385	9.21758	0	2.85816	0.5359	12.8617	11.1349	2.85816	0	0	0.50017	0	1.42908	0.02977	0.01786	0	0	4.66833	0	0.41681	6.19269	0	933	>500	15	1
OSTEO	0	2.11864	16.9491	5.64972	0	0	0	0	16.9491	0	0	0	0	0	19.774	0	0	0	0	0	2.11864	11.2994	4.23729	0	0	0	0	16.9491	3.76648	0	0	0	0	7.9096	0	0	0	0	118	<300	15	1
OSTEO	0.77279	1.449	15.4559	7.66358	3.86399	0	1.60999	0	5.40958	17.7743	0.09659	0.05795	0	0.19319	4.32767	0.38639	0.28979	7.41886	3.24575	3.86399	0.83719	11.592	5.68865	4.12159	0	0.96599	0	3.73519	16.744	0.04293	0.01287	0.60106	0.12879	3.48618	0.90159	0.32199	4.34484	1.44256	1294	>500	3	1
IPB	3.26797	0.81699	9.80392	8.16993	4.49346	0	4.08497	2.28758	0	2.17865	0.81699	0.32679	1.52505	0	8.3878	0	0	3.59477	14.488	9.25926	1.08932	5.80973	3.44953	1.49782	0	3.63108	0	0	0.72621	0.7716	0.08169	5.33769	0.54466	5.33769	0	0	1.3435	10.6754	612	>500	3	1
IPB	2.54939	1.67304	16.7835	23.0508	7.32951	0	2.92118	0	7.32951	11.0474	0.05311	0.0956	0.59485	0	8.32802	0.63734	0.69046	4.80136	2.08201	1.48715	0.63734	11.3306	15.3849	5.52369	0	1.77041	0	2.97429	12.0388	0.09737	0.06373	2.28029	0	3.37087	0.84979	0.31867	3.39211	1.98286	1569	>500	1	1
IPB	0.62421	0.93632	18.9347	16.958	11.236	0	0	0	4.99376	17.8943	0.026	0.07802	0.8739	0.93632	10.4869	0.62421	0	17.1036	1.74782	0	0.5722	10.8892	7.78541	8.68706	0	0.52018	0	4.88972	14.8426	0	0.026	0.8739	0.10403	7.57387	0.3121	0.13871	11.3469	1.35941	1602	>500	12	1
IPB	4.55927	2.56459	18.4904	19.5669	17.4772	2.02634	0.94984	3.19149	12.9179	10.6383	2.27964	0.01899	2.48227	0.37993	14.0071	5.31915	0	5.77508	6.02837	1.01317	1.58308	11.6515	8.92857	8.54863	0	2.11077	0.2364	5.95238	4.13712	0.91818	0.01899	1.53664	0.25329	6.79669	2.27964	0	3.65586	2.71868	1316	>500	1	1
IPB	0	0.70821	13.22	8.26251	1.41643	0	1.96726	0	6.13787	6.29525	0.07869	0	0	0	2.644	0	0.47214	6.61001	0	0.62952	0.43279	5.66572	5.92802	1.10167	0	1.83611	0	5.19358	5.14112	0.11803	0.04721	0.44066	0	2.35023	0	0.23607	5.14112	0.73444	1059	>500	1	1
IPB	0	0	14.1844	17.0213	2.12766	0	0	0	0	17.0213	0	0.21276	0	0	7.94326	0	0	1.70213	0	0	0	4.72813	4.96454	3.5461	0	0	0	4.25532	1.89125	0	0	0	0	1.32388	0	0.94562	0	0	235	<300	15	1
OSTEO	1.89994	5.0665	14.3551	13.5634	8.54972	0	0.52776	0	1.26662	5.0665	0.02638	0.06333	0	0	7.97973	0	1.1083	7.00866	1.18218	0.2111	3.11379	9.14784	8.74323	5.64703	0	0	0	1.79438	4.82021	0.00879	0.01055	0.39406	0.10555	4.23616	0.52776	0.71247	5.34797	0.19703	1579	>500	11	1
IPB	0	0.74074	6.91358	2.22222	5.92593	0	0	0	4.44444	0	0.24691	0.22222	1.38272	0	6.91358	1.48148	0	2.76543	0	0.98765	0.37037	6.91358	2.09877	2.71605	0	0	0	1.97531	1.31687	0.12345	0.02469	0.92181	0	3.68724	0.98765	0.06172	1.99177	0	675	>500	3	1
IPB	0	0	9.07029	4.39342	3.40136	0	0	0	0	9.07029	0.14172	0.17006	0	0	12.6984	1.70068	1.13379	6.34921	1.5873	0	0	7.36961	5.29101	2.83447	0	0	0	1.13379	7.55858	0.04724	0.05668	0	0	7.40741	1.70068	0	4.49735	1.0582	588	>500	3	1
OSTEO	4.49438	3.93258	23.97	16.4794	10.6742	0	0	0	12.3596	49.4382	0	0	0	0	31.4607	2.24719	0.56179	6.81648	12.5843	0	1.31086	17.2285	6.61673	12.3596	0	0	0	4.49438	22.9713	0.12484	0	1.04869	0	16.779	0	0	6.81648	4.19476	445	300-500	3	1
OSTEO	0	0	0	7.07851	0	0	0	0	0	21.879	0	0	0	0	7.20721	0	2.574	0	3.6036	0	0	1.716	7.72201	0	0	0	0	2.574	11.154	0	0	0	0	3.6036	0	0.858	0.2574	3.6036	259	<300	3	1
OSTEO	0	2.01613	5.37634	8.06452	0	0	0	0	8.06452	43.0108	0	0	0	0	37.6344	4.03226	0	0	7.52688	0	1.34409	8.96057	2.68817	1.34409	0	0	0	5.37634	14.3369	0.22401	0.1344	0	0	17.5627	8.06452	0	1.25448	7.52688	124	<300	3	1
IPB	0	0.79113	8.96624	22.6793	6.72468	0	2.63713	0	0.79113	8.43882	0	0.07911	0	0	10.3376	0	1.58228	3.13819	2.95359	0	0.59335	7.38397	12.7461	4.08755	0	0.87904	0	0.26371	6.50492	0.02197	0.02637	0	0	5.66104	0.79113	0	1.23066	2.09212	1264	>500	12	1
OSTEO	0.74294	0.37147	11.3918	4.45765	1.30015	0	0.92867	0	0	7.92472	0.15477	0	0.3467	0.18573	4.16048	0	0	0.69341	1.38683	1.23824	0.49529	9.82334	2.6003	1.11441	0	0.41274	0	0.24764	5.61334	0	0	0	0.12382	1.8491	0	0	0.03301	0.69341	1346	>500	3	1
OSTEO	4.81928	1.20482	8.03213	10.743	3.61446	0	3.01205	0	1.20482	22.49	0.3012	0	1.68675	0	17.992	0	5.02008	3.37349	1.1245	2.00803	0.2008	6.55957	8.73494	2.51004	0	1.00402	0	4.21687	14.4578	0.1004	0	1.1245	0.80321	8.43373	0	4.25033	3.10576	2.06158	830	>500	15	1
IPB	3.17259	1.11041	26.6498	20.4632	6.66244	0	2.11506	0	6.9797	11.4213	0.18506	0.03172	0.59221	1.90355	7.69882	0	0	14.4247	3.84941	2.11506	1.05753	17.555	14.4177	4.44162	0	1.41004	0.0987	5.60491	6.87394	0.18506	0.01586	0	0.42301	7.69882	0	0	9.51777	2.96108	1576	>500	11	1
IPB	0	5.15464	2.29095	12.0275	5.15464	0	2.86369	0	0	0	0	0	0	0	0	0	0	8.01833	0	0	4.86827	1.14548	7.06376	4.00916	0	0.95456	0	0	0	0	0	0	0	0	0	0	6.41466	3.74189	291	<300	11	1
OSTEO	1.91693	0.5591	10.6496	4.25985	3.35463	0	0.53248	0	4.79233	9.37167	0.05324	0.09584	0	0	11.3312	0	0.07987	6.26198	4.77103	1.27796	0.10649	7.73873	4.3131	2.50266	0	0.79872	0	2.7689	9.51367	0.13312	0.05324	0.69577	0.05324	6.26198	0	0.05324	3.03159	3.08129	1565	>500	1	1
OSTEO	2.61097	0.65274	14.3603	6.30983	1.30548	0	0.54395	0	7.8329	10.4439	0.13598	0.22845	0	0.32637	3.04613	2.61097	0.87032	9.09487	3.04613	0.43516	0.05439	9.21091	5.85654	1.19669	0	0	0	6.63621	8.12301	0.04532	0.06527	0	0	2.23383	0.21758	0	5.6861	2.03075	1532	>500	3	1
OSTEO	0	1.45773	11.6618	16.7639	4.37318	0	0	0	2.91545	0	0	0.14577	0	0	8.16327	0	0	0	0	0	0.97181	12.3097	14.5773	2.91545	0	0	0	3.88727	0	0	0.09718	0	0	8.16327	0	0	0.45351	0	343	300-500	11	1
OSTEO	2.53646	1.1097	22.8282	19.9746	5.70704	0	5.2843	0	4.12175	12.6823	0.7398	0.0317	2.07144	0	3.55105	1.90235	0	3.04375	1.18368	1.26823	1.1097	14.2324	11.6959	3.80469	0	3.25865	0	1.4796	6.48207	0.16733	0.02113	0.19728	0.26421	3.15649	0.63411	0	2.466	0.78912	1577	>500	1	1
OSTEO	1.26984	2.22222	9.31217	11.6402	11.4286	0	2.6455	0.59259	3.80952	11.3227	1.00529	0.14285	1.77778	0	13.6296	1.5873	0.15873	5.10053	6.22222	0.63492	1.50794	5.4321	6.63139	6.8254	0	2.73369	0.59259	3.91534	9.31217	0.59964	0.04232	1.18519	0	12.0988	0.42328	0.18518	5.91887	5.23457	1575	>500	1	1
IPB	102.564	12.8205	119.658	117.521	64.1026	0	10.6838	0	51.282	106.838	2.13675	0	11.9658	6.41026	59.8291	0	3.20513	23.0769	23.9316	34.188	7.47863	112.536	88.3191	60.8974	0	14.245	3.9886	42.735	165.242	1.78063	0.21367	3.9886	0	55.8405	0	1.06838	25.0712	27.9202	78	<300	1	1
OSTEO	5.82902	3.80505	16.1917	8.36572	5.18135	0	1.61917	0	2.26684	8.63558	0.94451	0.11334	0	0	6.6494	0	0.80958	3.3247	3.02245	2.15889	1.51123	10.1468	5.57714	2.05095	0.28785	2.06894	0	3.1304	4.17386	0.40479	0.02158	0	0	3.52619	0	0.55771	2.15889	1.61197	1544	>500	1	1
IPB	0	4.61133	19.3237	15.1515	10.5402	0	6.03865	1.22969	2.63505	15.8103	0.10979	0	2.45938	1.31752	3.68906	1.97628	0.32938	1.84453	0	0	2.30567	14.2	7.28297	6.8072	0.29278	2.74484	0	1.31752	8.78349	0	0.04391	2.25443	0.43917	1.63958	1.31752	0.10979	1.43464	0	759	>500	1	1
IPB	0	0.48828	14.3229	11.3118	6.83594	0	1.6276	0	3.90625	11.7188	0.20345	0.02441	0	0	9.11458	0.97656	0.12207	10.4818	0	0	0.16276	9.22309	6.97157	3.74349	0.21701	0.8138	0	3.41797	5.04557	0.08138	0	0.45572	0	3.03819	0.65104	0	5.64236	0.75954	1024	>500	12	1
IPB	9.52381	1.36054	14.5125	10.0907	2.04082	0	1.13379	0	5.44218	7.48299	0.11337	0.03401	0	0	1.26984	1.36054	0.34013	2.94785	0	4.53515	1.36054	7.86092	5.21542	1.81406	0	0	0	2.26757	1.81406	0	0.04535	0	0.11337	3.38624	1.36054	0	3.7037	0	735	>500	15	1
IPB	7.67085	2.35356	11.855	29.8698	15.516	0	3.19619	0.65086	8.71688	23.4775	0.17433	0.17433	0.65086	0	10.0883	0.69735	0.34867	4.23059	4.55602	4.88145	0.95885	9.22052	15.3611	10.1116	0	0.87168	0.4339	5.23013	15.1092	0.13559	0.03486	1.19324	0	11.824	1.51093	0.49395	1.51867	3.36278	1434	>500	1	1
IPB	0	1.0395	6.23701	19.6639	2.85863	0	6.06376	0	1.0395	7.62301	0	0	0	0	1.9404	0	0.51975	6.06376	1.9404	0	0.60637	3.927	13.1959	1.47263	0	2.45438	0	0	6.23701	0	0.01732	0	0	0.9702	0	0.8085	4.6893	0.8085	962	>500	15	1
IPB	6.23701	0.95287	14.553	6.98776	1.386	0	2.8875	0	10.395	9.24001	1.386	0	0.9702	0.3465	6.46801	1.386	0.462	5.49781	4.5276	4.62	0.63525	11.242	3.9655	1.0395	0	0.9625	0	4.851	4.312	0.2695	0	0.4312	0.231	2.5872	1.0395	0	3.4496	2.0482	1443	>500	3	1
OSTEO	0	2.48092	20.3562	10.369	6.87023	0	2.8626	0	4.19847	18.0662	0.19083	0.19083	2.49364	0	11.7557	0	0	9.7201	4.27481	4.07125	2.16285	16.4546	10.1357	7.6972	0	1.16624	0	4.07125	13.1043	0.10602	0.12722	0.35623	0	5.10602	0	0.33927	3.7659	2.61238	1310	>500	1	1
OSTEO	0	5	20	13.3333	20	0	8.33333	0	10	0	0.83333	0	0	0	0	0	0	0	0	0	0	5.55556	1.66667	10	0	0	0	6.66667	4.44444	0	0	0	0	0	0	0	0	0	100	<300	11	1
OSTEO	1.38985	0.52119	2.77971	22.1218	9.72898	0	6.94927	0	6.25434	14.4777	0.5791	0.26059	0.64859	1.21612	5.83739	1.38985	0.46328	2.13111	2.91869	0.46328	0.3185	3.47464	13.165	6.83345	0	5.69454	0	3.24299	9.18848	0.22199	0.05211	0.43239	0.46328	3.89159	0.69492	0.30885	1.30492	2.59439	1439	>500	1	1
IPB	0	1.94426	10.3694	31.7563	8.74919	0	1.89026	0	2.26831	5.61676	0.59408	0.51847	3.02441	1.78224	18.7513	0	0	7.345	3.93173	0	1.56621	6.98495	19.6947	5.8868	0	0.45006	0.45366	0.86411	5.04069	0.45006	0.24843	2.62116	0.97213	10.5854	0.43205	0.43205	3.50688	2.2179	1543	>500	1	1
IPB	2.5974	2.27273	9.95671	8.49567	8.44156	0	1.08225	0	1.2987	12.987	0.02705	0.11363	0	0	4.24242	0	0.48701	2.33766	4.24242	3.4632	1.56926	7.64791	7.43146	7.19697	0	0.36075	0	1.19048	9.23521	0.01803	0.15692	0.40404	0	3.93939	0	0.05411	1.83261	2.72727	1540	>500	11	1
OSTEO	5.08259	2.38247	15.4596	11.3299	3.65311	0.21177	3.17662	0.59296	2.5413	1.6942	0.05294	0	0	0.31766	3.55781	0	2.01186	5.92969	0	4.65904	1.74714	8.61217	7.518	2.32952	0	1.58831	0	1.48242	1.41183	0.12353	0	0	0.15883	1.87774	0	2.43541	3.45899	0	1574	>500	1	1
OSTEO	0	0.67144	8.35571	8.1319	5.37153	0	0.37302	0	2.23814	2.68577	0.1492	0.13428	0	0	6.68457	0	0	2.26798	0	0.59683	0.44762	6.16731	6.63981	3.73023	0	0.24868	0	2.98418	3.18313	0.01243	0.08952	0	0	2.50671	0	0.19894	1.71093	1.8104	1117	>500	3	1
OSTEO	3.19285	1.43678	18.0928	26.4474	9.4189	0	2.92678	0	4.1507	6.3857	0.61196	0.25542	1.192	0	17.433	3.19285	0.31928	6.70498	9.53597	1.70285	0.95785	11.0685	17.9686	5.16177	0.35476	2.12857	0	3.72499	5.74713	0.17738	0.14899	0.29799	0	13.2113	2.23499	0.15964	4.82475	6.35732	1566	>500	1	1
IPB	0	1.63755	18.9229	4.36681	4.36681	0	2.72926	0	6.55022	13.1004	0.27292	0	0	0	6.11354	0	0	0.29112	4.07569	2.91121	2.27438	17.2247	9.21883	6.55022	0	0.6065	0	6.91412	10.6744	0	0	0.67928	0	6.11354	0.3639	0.9704	0.58224	3.39641	458	300-500	1	1
IPB	0	1.00536	13.4048	5.69705	0	0	1.11707	0	1.34048	0	0	0	0	1.34048	0	0	0	0	0	1.78731	0.8378	7.59607	5.47364	0.44682	0	1.48943	0	0.44682	0	0.07447	0	0	0.67024	1.66816	0	0.29788	0	0	746	>500	13	1
OSTEO	0	0.18168	6.29845	12.2941	4.72384	0	0	0	3.99709	9.68992	0	0.01816	0.67829	0.36337	8.81783	0	0.54505	6.29845	0.67829	0	0.24224	6.13695	9.16505	3.99709	0	0.10093	0	2.42248	5.49096	0.03028	0	1.13049	0.12112	4.63501	0	0.42393	4.95801	0.90439	1376	>500	11	1
IPB	2.14362	0.66988	11.0754	14.2015	3.75134	0	0	0	9.6463	12.8617	0.08931	0.05359	1.00036	0	2.00071	0	0	1.50054	5.00179	1.07181	0.40192	7.14541	9.40812	2.14362	0	0.59545	0	4.46588	12.3854	0.07443	0.03572	1.50054	0	2.66762	0	0	1.29808	2.33417	933	>500	1	1
OSTEO	1.6129	3.22581	6.45161	13.8441	4.83871	0	0.67204	0	1.6129	5.91398	0	0.08064	10.914	0.40322	7.90323	12.9032	0	3.22581	0	3.22581	1.31048	6.00358	8.35573	3.22581	0	0.89605	0	1.6129	7.25806	0.0224	0	5.39427	0.40322	4.76703	7.25806	0	2.70609	0	1240	>500	13	1
IPB	3.76176	1.5674	23.8244	13.4796	12.3825	0	1.5674	1.17032	9.09091	22.257	0.10449	0.03134	0.58516	0	3.80355	0.62695	1.25392	4.09613	1.4629	2.92581	1.54127	13.3055	9.33473	7.57576	0	2.17694	0.3901	4.80669	12.4347	0.07836	0.01044	1.26785	0	2.73076	1.25392	0.83594	3.34378	1.4629	1595	>500	1	1
IPB	0	0	0	0	0	0	0	0	7.69231	0	0	0	0	0	7.17949	0	0	0	0	0	0	1.7094	0	0	0	0	0	0	0	0	0	0	0	0	0	0	0	0	130	<300	15	1
IPB	3.8835	6.79612	12.5135	11.4347	4.20712	0	3.23625	0.60409	3.23625	18.986	0.91693	0	0.60409	0	8.15534	5.17799	0.48543	2.97735	1.2082	4.53074	4.58468	11.1471	6.97591	4.58468	0	2.96656	0.40273	1.18662	16.2532	0.73714	0	1.40956	0	6.04099	3.8835	0.52139	2.17188	0.20136	1545	>500	1	1
IPB	2.17628	0	17.7729	9.88393	9.79325	0	2.72035	0	5.4407	18.1356	1.0428	0.08161	0	0	11.6794	0	0.40805	3.9173	3.04679	1.45085	0.18135	14.8712	5.35002	7.43562	0	1.9647	0	4.35256	15.5967	0.27203	0.07254	0.16926	0	6.43211	1.08814	0.45339	2.51481	2.03119	919	>500	1	1
IPB	7.06714	2.82686	12.7209	1.76678	3.88693	0	0.58892	0	2.12014	10.3651	0.02944	0.106	0	0.35335	5.9364	1.41343	0.73616	2.92108	1.9788	3.76914	1.17786	6.596	1.72752	3.76914	0	0.78523	0	3.06243	5.73223	0.08833	0.04711	0.21986	0.53003	5.38673	0.23557	0.23557	2.12014	1.3192	1415	>500	1	1
IPB	2.40577	0.40096	6.95001	5.34616	2.40577	0	0.66827	0	1.20289	6.01443	0.30072	0.12028	0	0.40096	1.49693	0	0	18.1502	0	0.80192	0.20048	4.63334	4.92293	2.00481	0	1.11378	0	0	4.63334	0.02227	0.0735	0	0.13365	1.74641	0	0	8.85681	0	1247	>500	1	1
OSTEO	5.01882	0.94102	25.9306	34.0862	5.01882	0	0	0	1.25471	16.3112	0.10455	0.06273	0	1.25471	2.34212	0	0	9.20117	0	3.34588	0.41823	22.4453	17.1825	3.24132	0	0	0	1.25471	11.4318	0	0.10455	0.7807	0.20911	1.36623	0.83647	0.10455	3.77806	0.39035	797	>500	13	1
IPB	4.44444	2.69841	15.873	13.7566	1.26984	0	1.5873	0	2.85714	6.77249	0.5291	0.61904	1.48148	0	12.4444	2.85714	1.26984	0.93121	2.96296	1.26984	1.16402	12.4868	7.33686	0.5291	0	1.41093	0	2.43386	5.78483	0.22927	0.3492	0.79012	0	9.77778	2.01058	0.23809	0.94532	2.66667	1575	>500	1	1
OSTEO	1.48478	1.94878	7.17644	7.85697	5.93912	0	5.2586	0	0	11.8782	0.12373	0.22271	2.07869	0	7.62188	0	0.37119	5.19673	2.77159	0.49492	1.54665	3.62946	5.65042	4.14501	0	2.99018	0	0.49492	7.75386	0.06186	0.19178	1.3858	0	5.77415	1.23732	0.18559	2.69735	1.27031	1347	>500	1	1
OSTEO	1.30293	1.4658	18.8925	22.9642	11.0749	0	1.62866	0	5.53746	20.304	0.08143	0	0	0	6.08035	0	0.48859	5.99349	0	0	0.38002	16.5762	14.3141	6.84039	0	1.17626	0.10133	4.56026	7.16612	0.07238	0.00542	0.10133	0	4.45892	0.54288	1.4477	3.67716	0.30401	1535	>500	11	1
IPB	4.44444	0.31746	12.2751	15.4497	4.44444	0	3.96825	0	6.98413	3.59788	0.5291	0.42857	0	1.11111	9.48148	0	0.21164	14.963	13.3333	2.32804	0.291	8.95944	8.53616	3.38624	0	1.0582	0	2.96296	3.10406	0.29982	0.291	0	0.31746	4.74074	0	0.14109	8.44444	9.48148	1575	>500	1	1
IPB	0	0.95057	6.97085	14.2586	4.75285	0	3.16857	0	9.5057	2.53485	0.31685	0	0	0	8.87199	0	4.27757	6.21039	0	0	0.79214	6.1259	14.3642	5.06971	0	1.58428	0	6.65399	2.95733	0.21123	0	0.59146	0	4.73173	0	0.63371	6.21039	0	526	>500	1	1
IPB	3.17965	1.58983	15.1033	38.6195	10.7313	0	1.98728	0	12.3211	18.018	0.56306	0	0	0	14.8384	0	0.26497	2.04028	2.96767	1.58983	1.45734	7.59583	18.5921	5.76312	0	0.66242	0	5.03445	10.4222	0.38641	0	0	0	12.9836	0	0	1.69581	2.72037	1258	>500	12	1
OSTEO	4.29646	1.61117	13.6054	2.95381	7.5188	0	1.79019	0	1.07411	11.0992	0.0895	0.0537	0	0	7.01754	0	0	3.00752	2.00501	3.58038	0.9846	10.0251	3.22234	3.93842	0	1.34264	0	1.79019	7.5188	0.05967	0.0537	0	0.17901	6.51629	0	0	2.33918	0	931	>500	13	1
OSTEO	0	0	9.66184	0	7.24638	0	0	0	0	0	0	0	0	0	0	0	0	0	0	0	0	8.05153	2.41546	6.03865	0	0	0	0	0	0.60386	0	0	0	0	4.83092	0	0	0	138	<300	3	1
IPB	2.64901	1.82119	20.309	16.2252	6.29139	0	1.37969	0	1.65563	5.73951	0.71743	0.16556	0	0	4.94481	0	0	2.47241	1.2362	2.64901	1.766	8.83002	14.128	3.64238	0	1.74761	0	1.54525	3.82634	0.30353	0.13245	0	0	2.26637	0	0.16556	2.06034	1.44224	1510	>500	1	1
OSTEO	1.42857	0.53571	21.9048	13.1548	10.3571	0	2.38095	0	5	8.57143	0.50595	0.08928	2.66667	0.35714	6.66667	0	0	3.04762	2.66667	1.42857	0.65476	14.4444	9.74206	7.38095	0	1.98413	0	4.52381	6.8254	0.16865	0.0119	1.55556	0.11904	3.77778	0	0	2.46032	1.77778	1400	>500	11	1
IPB	6.9797	6.18655	12.0558	9.72927	9.51777	0	6.0808	0	3.48985	19.4585	0.47588	0.09517	1.18443	0.63451	6.51438	1.58629	1.13684	5.77411	4.73773	1.90355	2.16794	8.46024	4.86464	4.70601	0	3.26072	0	2.53807	11.6681	0.33488	0.0423	0.39481	0.52876	5.72476	0.2115	0.42301	3.05979	3.35589	1576	>500	1	1
OSTEO	0	1.47493	14.7493	23.7217	5.16224	0	1.22911	0	0	7.86627	0.18436	0	0.68829	0	8.94789	1.47493	0	0	1.3766	0	0.49164	10.1606	15.2819	6.14553	0	1.22911	0	0	5.57194	0.08194	0	0	0	2.52376	0.49164	0.32776	0	1.83546	678	>500	1	1
OSTEO	0	0.89179	10.7015	7.23345	4.16171	0	0.99088	0	2.37812	0	0.19817	0.05945	1.10979	0	1.66468	0	0	3.48791	4.43916	0	0.19817	4.22777	4.85533	2.17994	0	0.82573	0	1.18906	0	0.47892	0.03963	0.73985	0	2.95944	0	0	1.75717	3.1444	841	>500	1	1
OSTEO	0.63532	1.0324	9.95341	12.0182	2.5413	0	1.58831	2.07539	2.5413	9.31809	0.07941	0.01588	0	0	12.1559	3.49428	0	1.24947	0	0.21177	0.58238	7.05916	8.3298	0.84709	0	0.97063	0	0.63532	4.65904	0.01764	0.01058	0	0	6.22618	2.75307	0.51178	1.12241	0.19765	1574	>500	1	1
IPB	10.6383	3.32447	14.1844	1.77305	13.9628	0	3.32447	0	0	7.0922	0	0.13297	0	0	0	0	0	15.2482	2.48227	3.5461	1.55142	7.0922	1.18203	9.53014	0	3.69385	1.65485	1.32979	9.45626	0.07387	0.04432	0.82742	0	2.89598	0	0	5.93972	0.82742	376	300-500	1	1
OSTEO	0	0.23976	4.4757	13.9599	6.71355	0	1.33205	1.4919	2.23785	6.39386	0.21312	0.0959	0.59676	0.15984	8.05627	0	0	0.59676	0.29838	0.42625	0.21312	3.41006	8.1877	3.99616	0	1.42086	1.24325	1.91816	4.68883	0.1332	0.01065	1.09406	0.15984	5.37084	0	0.15984	0.68911	1.59136	1564	>500	1	1
IPB	0	0.32786	12.459	4.7541	13.1148	0	1.36612	0.61202	2.62295	17.4863	0.05464	0	0	0	1.83607	1.31148	0.4918	3.80328	1.22404	0	0.16393	7.86885	4.11658	9.01639	0	0.63752	0	2.0765	9.03461	0.01821	0	0.204	0	0.81602	1.63934	0.05464	2.0255	1.63206	1525	>500	12	1
IPB	3.99202	1.74651	14.1938	23.2313	5.48902	0	1.66334	0	2.32868	9.98004	0.05544	0.26613	0.31049	0.33266	4.96784	0	0.88711	4.03637	0.62098	1.77423	0.69305	10.5715	14.7298	3.65935	0	0.55444	0	2.88312	5.9141	0.06468	0.16633	1.03497	0.22177	2.79441	0.44355	0.42507	3.15665	0.10349	1503	>500	1	1
OSTEO	1.44509	2.34827	13.4875	20.1108	7.40607	0	4.21484	0	3.25145	2.40848	0.96339	0.07225	0	1.44509	10.79	2.89017	0.72254	3.90173	1.34875	1.20424	1.35477	8.50996	12.9255	3.67293	0	1.5053	0	2.04721	3.693	0.5419	0.05419	0.44958	0.48169	7.41811	0.48169	0.24084	2.48876	2.4727	1384	>500	1	1
IPB	0	0	0	0	0	0	0	0	8.19672	0	0	0	0	0	0	0	0	0	0	0	0	10.929	9.10747	0	0	0	0	0	0	0	0	5.10018	2.73224	1.27505	0	0	0	0	61	<300	13	1
IPB	9.57592	1.11149	10.0319	13.6229	5.30096	0	1.70999	1.27679	0.68399	12.7679	0.17099	0	0.31919	0.68399	1.27679	0	0.51299	1.27679	0	8.89193	0.82649	7.44794	10.3549	5.35796	0	1.13999	0.74479	1.13999	10.2219	0.08549	0	0.21279	0.39899	2.23438	0	0.55099	1.27679	0.21279	1462	>500	15	1
IPB	3.80711	0.95177	13.1134	14.8054	4.44162	0	4.23012	0	6.9797	14.3824	0.26438	0.15862	0.2961	0	26.0575	2.22081	0.87246	0.63451	2.36887	2.96108	0.39657	7.1912	7.54371	1.85068	0	2.64382	0	3.48985	7.1207	0.11456	0.07931	0.49351	0	11.5482	1.05753	0.51995	0.49351	1.67795	1576	>500	1	1
OSTEO	5.40958	1.5456	12.3648	9.40237	6.18238	0	1.60999	0	5.02318	8.50077	0	0.03863	0.36063	0.38639	4.32767	0.77279	0.35419	10.3297	6.85214	1.288	0.61179	10.8192	5.13052	4.37919	0	1.39533	0	2.31839	9.35944	0.05366	0.00643	0.12021	0	2.04362	0.38639	0.18246	7.29006	3.24575	1294	>500	3	1
IPB	1.91327	0	5.10204	11.5859	3.18878	0	0.79719	0	2.55102	4.2517	0.18601	0.03188	0	0	5.65476	0	0.95663	2.67857	5.05952	0.85034	0.90348	9.56633	13.0917	5.52721	0	1.06293	0.19841	3.72024	4.92489	0.25687	0.01062	1.78571	0.05314	11.1607	0	0.31887	4.16667	4.7619	1568	>500	11	1
OSTEO	0	0.9372	10.9341	1.95251	2.34302	0	0.781	0	1.40581	7.49766	0	0.04686	0	0	0.87472	0	0.8591	1.81193	0	0.9372	0.6248	7.60179	1.97855	2.03062	0	0.65083	0	1.09341	4.99844	0.13016	0.01562	0.14578	0	0.87472	0	0	0.83307	0	1067	>500	1	1
IPB	1.0582	1.71958	9.52381	9.70018	11.1111	0	0.88183	1.97531	2.6455	2.82187	0.17636	0.13227	1.97531	0	16.7901	0	0.26455	2.1164	5.4321	0	0.57319	5.29101	8.02469	9.52381	0	1.46972	1.31687	1.0582	3.99765	0.13227	0.03527	0.98765	0	9.38272	0	0.26455	1.19929	3.95062	945	>500	1	1
IPB	6.33714	3.08935	8.44951	18.4305	3.64385	0	1.32024	0	1.90114	13.0968	0.31685	0.09505	3.25306	0.95057	4.14026	0.95057	0.07921	3.5488	5.02746	5.28095	2.05957	5.77383	12.6567	2.16519	0	0.52809	0	1.90114	9.15364	0.07921	0.06337	2.6616	0.21123	2.07013	0.63371	0	2.19687	2.46444	1578	>500	1	1
OSTEO	10.3321	2.21402	12.7921	14.0836	5.16605	0	0.9225	0.3444	2.21402	12.3001	0.4305	0.05535	1.37761	0	16.5314	0.738	0	0.6888	5.85486	5.41205	2.06027	13.0381	8.38458	2.46002	0	0.615	0.4592	2.95203	6.72407	0.205	0.04305	0.9184	0	5.74006	3.56704	0	0.2296	2.64043	1355	>500	1	1
OSTEO	0	2.11193	18.3034	12.6716	4.22386	0	0.87997	0	2.11193	8.44773	0	0.05279	0.98556	0	2.95671	1.58395	0	1.47835	0	0	0.61598	9.03438	8.03708	1.58395	0	0.43998	0	0.35198	2.81591	0	0.05279	0	0.26399	1.97114	1.40795	0	0.56318	0.32852	947	>500	1	1
IPB	0	2.49377	11.2219	4.88362	2.18204	0	2.07814	0	2.49377	5.81879	0.1039	0.15586	1.74564	0	10.4738	1.87032	0	8.72818	0.58187	0	2.70158	6.92713	4.05237	4.67581	0	0.86589	0	0	6.09587	0	0.14546	0.58187	0	6.59462	1.03907	0	5.02909	0.58187	802	>500	1	1
OSTEO	5.15796	1.45068	22.5661	9.24135	3.38491	0	2.14915	0	5.80271	3.86847	0	0.09671	3.91145	0.64474	6.3185	0	0.48355	3.91145	3.00881	1.28949	1.02085	13.6829	7.14593	3.11627	0	1.34322	0	2.68644	3.15209	0.03581	0.06447	4.11204	0.32237	4.01175	0	0.3761	2.95866	2.20646	1551	>500	1	1
OSTEO	1.27796	2.47604	8.5197	9.69116	8.14696	0	1.86368	0.59637	7.98722	14.2705	0.39936	0	1.19276	0	3.87646	0.95846	0	0	0.89456	0.85197	1.57082	6.81576	5.66205	5.27157	0	0.97621	0.49698	3.19489	8.73269	0.25736	0	0.99396	0	1.88853	1.27796	0	0.15619	1.19276	1565	>500	1	1
IPB	0.88809	0.44404	12.7294	4.73653	5.77265	0	0.37004	0	2.6643	9.76909	0.074	0	0.82889	0	6.2167	0.88809	0	0.47365	1.65779	0.29603	0.33303	7.00612	7.22814	4.14446	0	0.24669	0	2.07223	12.7294	0.02466	0	0	0.14801	2.48668	1.18413	0	0.69074	2.07223	1126	>500	1	1
OSTEO	5.07292	1.1097	9.30036	8.66624	0	0	0	0	1.26823	6.7639	0.10568	0.0317	0	0	3.84697	0	0.84548	12.4709	0	1.26823	0.95117	6.7639	5.98887	0	0	0.70457	0	1.26823	6.90481	0.03522	0	0	0	2.17008	0	0.28182	9.24399	0	1577	>500	3	1
OSTEO	0	1.52323	10.1549	11.0434	1.52323	0	0.63467	0	0.76161	8.12389	0.03173	0.01904	0	0	0	0.76161	1.52323	3.19878	0	0.25387	0.1904	5.58517	7.23534	1.26936	0	0	0	1.7771	10.4934	0.10577	0	0.23694	0.06346	0.23694	0.12693	0.52889	2.48794	0.47389	1313	>500	3	1
IPB	2.71739	0	7.69928	9.62409	5.43478	0	0	0	0	5.43478	0	0	3.17029	0	3.17029	1.3587	0.90579	0.63405	0	2.26449	0.33967	5.13285	5.47252	2.03804	0	0.1887	0	0	6.64251	0.07548	0	1.26812	0	2.53623	0	1.20773	0.84541	0.84541	736	>500	3	1
OSTEO	6.64452	0.83056	32.4843	14.8579	2.21484	0	4.61425	1.03359	1.66113	17.7187	2.39941	0	1.55039	0	9.30233	0	0.27685	15.7623	1.55039	1.47656	0.36913	12.4277	6.36766	1.47656	0	2.46093	0	1.66113	9.35154	0.67675	0	0.86132	0	6.02929	0	0.09228	7.06288	1.03359	903	>500	1	1
OSTEO	6.22407	1.38313	12.4481	14.5228	13.6584	0	1.44076	0	3.11203	11.9871	0.17289	0.06915	0	0.17289	4.84094	1.03734	0	14.6842	0.96818	1.84417	0.74919	7.99139	10.2005	7.66482	0	0.86445	0.10757	3.34255	9.22084	0.01921	0.06339	0.64545	0.11526	2.58183	1.26787	0.02881	9.144	2.15153	1446	>500	12	1
OSTEO	1.33869	0.502	11.8251	16.0085	13.5542	0	0.55778	0	6.35877	8.03213	0	0	0	0	0	0	0.75301	12.3829	6.87193	0	0.22311	8.32961	12.4944	9.53815	0	0.83668	0	3.56983	6.99093	0.02788	0	0	0	0	0	0	8.85765	4.89365	1494	>500	12	1
OSTEO	0	0.89221	9.27909	13.2049	1.96288	0	2.97407	0.66619	3.92577	11.6583	0.17844	0.53533	0	0	6.32881	1.78444	6.24554	12.1104	9.65977	0	1.15989	4.28266	1.94306	2.02236	0.0793	1.6853	0.22206	4.52058	4.91712	0.26766	0.07137	0.55515	0	2.99786	0.71377	0.23792	7.40741	6.43984	1401	>500	15	1
IPB	1.27389	1.99045	19.9575	55.7856	7.00637	0	2.12314	0	3.82166	6.36943	0.05307	0.03184	0.89171	0	5.64756	0	1.75159	7.26115	0.29723	0.21231	1.11465	14.7912	27.4062	3.7155	0	1.15004	0	3.39703	4.24628	0.29193	0.01061	0	0	3.17056	0	0.38924	5.49894	0.19815	1570	>500	11	1
IPB	0	0.19098	17.0614	21.0721	4.58365	0	0	0	4.20168	21.3904	0	0	0	0	3.56506	0	0.50929	4.48179	0	0	0.19098	13.8358	14.1541	4.329	0	0.3183	0	2.80112	12.2231	0.23342	0.01909	0.11883	0	3.08972	0.12732	0	2.44461	0	1309	>500	3	1
OSTEO	0	1.90476	5.92593	13.1217	7.14286	0.63492	1.0582	0.59259	1.5873	3.49206	0.58201	0.03174	1.48148	0	8.2963	0	0.39682	3.34392	0.59259	0	1.00529	2.61023	9.75309	1.42857	0.28218	1.41093	0.19753	0.74074	2.89242	0.04409	0.05291	0.59259	0.10582	3.55556	0	0.44091	1.04409	0.59259	1575	>500	1	1
OSTEO	0.71942	2.8777	30.2158	16.6667	5.03597	0	1.19904	1.34293	0.71942	7.67386	0.38968	0	0	0	13.0935	2.51799	0.17985	4.94005	1.00719	1.43885	2.21823	19.3445	10.052	4.3765	0	1.79856	0.67146	0.71942	2.55795	0.26978	0	0	0	9.73621	0.83932	0	3.14948	2.57394	1390	>500	3	1
OSTEO	0.6485	3.40467	11.457	21.0765	9.40337	0	1.62127	0	6.80934	33.0739	0.70255	0	1.21055	0	3.32901	0	0.6485	2.11846	1.81582	0	1.99957	9.36734	15.1138	5.29615	0	1.62127	0.40351	5.18807	24.5713	0.35127	0.03242	0.20175	0	3.83341	0	0	2.11846	1.00879	1542	>500	15	1
OSTEO	5.35475	1.00402	14.9487	30.1205	17.403	0	1.67336	0	1.00402	15.618	0	0.03346	0.62472	0	5.62249	0	0	6.55957	1.87416	2.67738	0.502	12.4944	22.8135	10.0402	0.14874	1.76632	0	3.45828	11.4532	0	0	0.5206	0	2.18652	0	0	4.90852	1.0412	1494	>500	12	1
IPB	0	2.27432	15.3954	7.75601	8.92232	0	2.04105	0	6.9979	10.0303	0.02915	0.22743	1.30627	0	4.24539	0	0	8.09424	3.26569	0	1.108	9.95257	6.58969	6.06485	0	1.65228	0	5.83158	5.2873	0.03887	0.13995	0.21771	0	5.00739	0	0	5.05404	0.9797	1429	>500	11	1
OSTEO	0	0.2085	8.8963	15.499	4.58716	0	0.69502	0	2.50209	13.9005	0	0.2502	0	0	0.77842	0	0.97303	5.9494	0	0	0.278	4.17014	8.71096	3.12761	0	0.92669	0	1.94607	8.71096	0.10425	0.2641	0.77842	0	1.29738	0	0.25484	4.38328	0.64868	1199	>500	1	1
IPB	0	0	7.51476	13.4192	1.61031	0	0	0	0	6.44122	0.46967	0	0.75147	0	17.284	0	0	0.85882	6.01181	3.75738	0.93934	9.84076	14.0902	2.54965	0	0.67096	0	0.80515	8.05153	0	0	2.50492	0.40257	12.2741	0	0.71569	0.66201	2.50492	621	>500	1	1
OSTEO	10.2136	1.04457	11.4516	10.3683	8.8208	0	6.19003	0	3.71402	6.80904	0	0.1857	0	0.46425	3.03312	0	0.23212	2.59981	3.89972	6.19003	0.23212	6.49954	8.74342	7.11854	0	0.64479	0	2.47601	5.15836	0	0.10832	0	0.15475	0.57773	0	0.15475	2.38316	3.17755	1077	>500	1	1
IPB	0	1.78288	7.39567	13.2726	1.78288	0	3.6318	0	0	2.64131	0.13206	0.05942	0	0	11.0935	0.79239	0	0.73956	2.2187	0.52826	0.59429	3.69783	6.14105	0.92445	0	1.32066	0	0.66032	3.34566	0.11005	0.02641	0	0	6.28632	0.66032	0	1.0037	2.09544	1262	>500	1	1
OSTEO	0.79808	0.4988	15.9617	28.465	7.18276	0	2.32775	0	1.59617	8.77893	0	0.05985	0	0.39904	7.82123	0	0.19952	3.56478	3.72439	0.53205	0.26602	7.44879	17.58	3.92392	0.08867	1.33014	0	1.72918	6.91673	0.19952	0.00665	0	0.26602	2.97952	0	0	2.89971	1.48976	1253	>500	1	1
IPB	1.89394	0.71022	11.9949	25.9627	8.04924	0	1.57828	0	1.89394	5.05051	0.03945	0	0	0.23674	5.30303	0	0.47348	11.4899	0.88383	0.94696	0.55239	7.15488	13.7048	2.84091	0	0.78914	0	2.2096	3.57744	0	0	0	0	4.49285	0.31565	0.15782	9.57492	0.88383	1056	>500	13	1
OSTEO	0	1.43472	10.9995	12.7929	2.86944	0	1.1956	0.66953	3.5868	7.65184	0.8967	0	0	0	5.35629	1.43472	0	0.52606	0	0	1.10593	9.80392	7.67177	1.91296	0	1.99267	0	1.67384	4.54328	0.13948	0	0	0	5.02152	1.1956	0	0.41447	1.11589	1394	>500	3	1
IPB	0.63532	3.97078	11.6476	4.87082	2.85896	0	0.79415	0	2.85896	3.81194	0.34413	1.38183	0.88945	0	13.6383	1.27065	1.90597	0.74121	5.33672	0.42354	2.22363	8.25921	3.42369	2.48835	0	0.97063	0	1.37654	1.6942	0.17647	0.8418	1.58125	0	6.325	0.31766	0.95298	0.79062	3.06367	1574	>500	1	1
OSTEO	5.09091	2.72727	13.0909	11.4545	4.36364	0	0.60606	0	2.18182	9.21212	0.24242	0.10909	2.03636	0	6.44848	0	0.66666	4.33939	1.01818	3.39394	2.27273	9.21212	8.60606	3.21212	0	0.80808	0	0.72727	9.85859	0.15151	0.02424	2.71515	0	4.86465	0	0.0606	2.92525	1.01818	1375	>500	1	1
OSTEO	0.7874	0.09842	10.4987	14.5013	4.72441	0	1.9685	0	2.75591	6.82415	0.32808	0.11811	1.46982	0	12.8609	1.9685	0.19685	0	2.93963	0.26246	0.13123	5.51181	6.97725	3.08399	0	0.43744	0	5.51181	5.86177	0.17497	0.06561	1.46982	0	8.20647	1.9685	0.7874	0.55993	1.71479	1270	>500	1	1
IPB	5.68182	0	8.52273	28.6458	8.52273	0	0	0	1.42045	11.3636	0.11837	0.28409	0	1.42045	6.62879	0	0	13.9205	2.65152	5.68182	0.23674	5.05051	20.4388	8.04924	0	0	0	2.36742	20.202	0.03945	0.14204	0.44191	0.71022	6.18687	0	0	12.0265	0.88383	352	300-500	15	1
IPB	2.56575	2.24503	24.8022	25.4437	10.263	0.42762	3.74171	0.29933	5.45221	16.6774	0.13363	0.0481	1.19735	0.48107	4.49006	0	0.29399	2.95061	4.49006	1.06906	0.32071	11.7597	14.3076	3.36754	0.14254	1.15815	0.19955	1.92431	9.2652	0.08017	0.03207	0.39911	0.21381	1.59646	0	0.17817	3.31409	1.69624	1559	>500	11	1
OSTEO	5.8309	0.91107	10.69	14.0914	0	0	1.82216	0	5.10204	11.1759	0	0.03644	1.36054	0	2.72109	0	0.36443	0.68027	2.72109	0	0.24295	8.09848	9.27276	0.12147	0	0.40492	0	3.40136	5.50696	0	0.04859	0.45351	0	2.49433	0	0	0.45351	2.26757	686	>500	1	1
IPB	0	0	6.15385	2.05128	1.53846	0	1.28205	0	0	0	0.51282	0	2.87179	0	21.5385	0	0	7.89744	5.74359	0	0.1282	6.83761	3.76068	2.05128	0	0.8547	0	0	0	0	0	3.82906	0	7.65812	3.07692	0	6.94017	0.95726	325	300-500	1	1
OSTEO	5.64972	2.00094	10.0439	5.72819	2.35405	0	0.39234	0	1.41243	14.4382	0.03923	0.02354	0	0	4.39422	0	0	2.35405	2.63653	2.51099	1.21626	6.06822	6.09437	2.04018	0	0.91546	0	2.35405	5.85897	0.02615	0.01569	1.02532	0	1.17179	0.4708	0	1.44382	2.63653	1062	>500	3	1
IPB	1.36799	1.02599	1.59599	3.70497	2.39398	0	0.28499	0	0.68399	0.11399	0.02849	0.01709	0.63839	0	1.27679	0	0.45599	0.50159	1.27679	0.45599	0.68399	1.82399	4.04697	1.93798	0	0.47499	0	1.36799	2.88798	0.01899	0.01139	0.10639	0	1.70239	0	0.45599	0.34959	0.85119	1462	>500	1	1
OSTEO	1.2747	0.63734	12.747	10.0382	7.01083	0	2.65562	0	4.14277	9.77268	0	0.35054	1.48715	0.63734	2.37943	0	0	2.97429	1.18972	0.84979	0.53112	9.06451	7.55966	4.99256	0	0.4426	0	1.91205	7.08165	0	0.18058	1.09057	0.42489	1.68543	0	0	2.76893	1.09057	1569	>500	12	1
IPB	2.47831	0.61957	10.7394	5.36968	2.47831	0	1.54895	1.44568	0	6.60884	0.05163	0.24783	0	0	8.09583	0	0	2.97398	4.04791	7.848	1.03263	9.91326	2.27179	1.75547	0	1.20474	0	0	5.232	0.27536	0.16522	0	0	4.24067	0	0.10326	0.90871	5.97549	807	>500	1	1
IPB	3.9604	2.47525	15.1815	18.8119	2.9703	0	4.9505	1.38614	0	2.64026	0.16501	0.099	0	0	7.39274	0	0.49504	0	2.77228	1.9802	1.23762	10.231	10.121	1.89769	0	2.06271	0.15401	0	3.41034	0.055	0	0.77007	0	3.69637	0.33003	0	0	2.0022	1010	>500	1	1
OSTEO	1.90355	3.41053	18.6125	30.1925	7.29695	0	2.11506	0	7.61421	15.8629	0.05287	0.1269	1.77665	0	16.5821	0	0	4.90694	11.5482	1.26904	0.63451	13.3954	18.3834	5.1819	0	0.9694	0	6.55668	15.7219	0.17625	0.08989	2.07276	0	10.3638	0	0.05287	3.61675	7.69882	1576	>500	1	1
IPB	2.77971	0.52119	8.33912	24.2645	4.51703	0.46328	0.5791	0	5.90688	11.5821	0.17373	0	2.59439	1.04239	10.0533	0.69492	0	2.68705	2.59439	1.15821	0.34746	7.56698	20.6162	3.3009	0.15442	1.15821	0	4.4012	7.6828	0.06756	0	4.21589	0.23164	7.67508	1.15821	0	2.19288	2.59439	1439	>500	1	1
OSTEO	3.81679	1.4313	14.419	21.3104	2.54453	0	1.59033	0.29686	0.63613	12.7226	0.26505	0.06361	0.59372	0	8.31213	1.9084	0.79516	8.39695	10.0933	1.06022	0.90118	9.1179	11.3974	1.48431	0	0	0.1979	1.69635	6.78541	0.01767	0.0159	1.78117	0	4.9477	1.69635	0.67147	4.7922	6.53096	1572	>500	3	1
IPB	0	0.33534	8.27185	10.3957	5.36553	0	1.67673	0	4.69484	10.731	0	0	0	0	7.19875	0	0.50301	8.07065	0.62597	0.44712	0.33534	8.12281	8.06692	2.68276	0	1.21097	0	2.12385	7.7502	0.01863	0	0	0	6.46844	0	0.11178	6.22997	0.20865	1491	>500	1	1
IPB	1.33958	0.33489	16.5215	11.4423	6.02813	0	0.55816	0	3.34896	9.37709	0.19535	0.13395	0.62513	0	9.37709	3.34896	0.16744	7.81424	2.50056	0	0.39071	8.33519	9.09801	4.91181	0	0.93026	0	2.45591	5.13507	0.14884	0.06139	0.52094	0	5.41788	1.33958	0.23256	6.83188	1.87542	1493	>500	13	1
IPB	0	1.11111	5.29101	21.0582	0.31746	0	0.79365	0.29629	0	2.1164	0.02645	0.01587	0	0	8	2.22222	1.37566	6.22222	6.81481	0.21164	1.13757	5.36155	12.0811	0.58201	0	0.88183	0	0.74074	1.12875	0.02645	0.04232	0	0	4.93827	1.0582	0.42328	4.64198	4.04938	1575	>500	13	1
IPB	5.89226	1.6835	14.0292	5.47138	10.101	0	0	0	6.73401	19.9214	0	0.08417	0	1.89394	1.57127	0	0	2.74972	2.3569	3.92817	2.03423	13.468	8.51104	6.94444	0	0.23381	0.52375	5.75196	14.7774	0.23381	0.07014	0.39281	0.70145	7.20165	0.56116	0.35072	2.73101	3.79723	1188	>500	1	1
IPB	0	0	10.1652	9.10631	6.35324	0	1.58831	0.59296	2.22363	16.5184	0.1853	0.06353	1.48242	0	19.568	2.22363	0.63532	3.76959	2.96485	0	0.15883	5.57673	5.13554	4.34138	0	1.05887	0.39531	1.16476	8.82394	0.25589	0.11118	1.97656	0	12.8477	2.32952	0.45002	3.0072	0.39531	1574	>500	1	1
OSTEO	0	0	54.6448	26.6393	16.3934	0	6.8306	0	16.3934	0	0	0	0	0	7.65027	0	0	48.0874	15.3005	0	0	41.8944	17.3042	19.8087	0	2.27687	0	9.56284	1.82149	1.36612	0	0	0	2.55009	2.73224	0	37.9781	5.10018	122	<300	3	1
OSTEO	0	0.3894	19.2108	19.7949	9.15109	0.51921	0.97352	0	4.6729	8.30737	0	0	0.72689	0	2.18069	0	10.1246	1.81724	0	0	0.3245	14.0187	12.0284	6.23053	0.34614	0	0	4.6729	7.96123	0.02163	0.01298	0.72689	0	0.96919	0	5.71132	1.57494	0	1284	>500	11	1
OSTEO	7.21154	1.5024	12.8205	18.3293	6.61058	0	2.00321	0	7.21154	8.8141	0	0.06009	0.56089	0.60096	2.80449	0	0	19.6715	3.36538	2.00321	1.15184	7.74573	10.5168	4.00641	0	3.17174	0	3.40545	5.34188	0.03338	0.06009	0	0.80128	2.61752	0	0.10016	12.7003	2.24359	832	>500	1	1
IPB	4.78469	1.19617	15.4933	6.89223	5.80998	0	1.42401	0	4.44293	6.37959	0.02848	0	0	0	3.82775	0.68352	0	4.46571	5.74163	3.18979	0.51264	9.49343	2.77208	3.87332	0	0.2848	0	3.7594	4.25306	0.04746	0	0.10632	0	2.12653	0.45568	0.05696	2.09615	3.29612	1463	>500	13	1
IPB	0	0.17556	11.236	11.9382	4.21348	0	2.92603	0	2.80899	4.91573	0.11704	0	0	0.35112	12.4532	0	0	1.31086	5.24345	0	0.46816	7.80275	8.93414	2.34082	0	1.36548	0	2.34082	3.27715	0	0	0	0	7.20974	0.46816	0	0.8739	3.05868	712	>500	1	1
IPB	2.53807	2.06218	23.2657	10.2052	2.22081	0	2.90821	0	7.61421	9.09475	0.07931	0.06345	1.18443	0	15.9899	1.26904	1.11041	3.25719	1.77665	4.65313	1.11041	13.8184	8.65412	2.85533	0	2.37944	0	5.28765	11.6328	0.03525	0.01057	0.98702	0	11.5482	1.05753	0.58164	2.56627	1.38184	1576	>500	1	1
OSTEO	0	6.94444	22.8758	11.4379	5.71895	0	2.72331	0	6.53595	13.0719	0.81699	0.24509	1.52505	0	6.86275	2.45098	0	0	1.52505	0	4.22113	12.5272	9.4862	2.17865	0	2.49637	0	2.72331	5.44662	0.54466	0.08169	0	0	6.60857	3.26797	0.40849	0	0	612	>500	1	1
OSTEO	0	1.01112	0.67408	40.7819	0	0	1.2639	0	0	6.74082	0	0.10111	0	0	6.13414	1.01112	0	13.4816	0	0	0.4213	1.79755	26.233	0	0	3.51084	0	0	5.84204	0	0.05055	0.62914	0	3.14571	0.67408	0	7.87552	0	989	>500	1	1
OSTEO	14.333	4.13451	15.4355	3.67512	3.30761	0	0.45938	0	4.41014	8.82029	0.04593	0	0	1.37817	4.63065	0	0	1.94781	0	12.8629	2.89416	12.6179	3.58324	3.49136	0	0.76564	0	1.6538	5.63518	0.1225	0	0	0.45938	2.74409	0.55126	0	1.69055	0.51451	907	>500	13	1
OSTEO	0	0.49374	17.9943	13.6603	3.29164	0	2.19443	0	1.97498	5.70551	0.10972	0	3.68664	0	9.21659	0	0	3.68664	1.22888	0.43888	0.43888	9.65548	9.43603	2.0847	0	0.64004	0	0.65832	3.94997	0.23772	0.01097	2.25294	0.32916	5.63236	0.21944	0	2.66257	1.12647	1519	>500	11	1
OSTEO	0	5.72884	19.5205	16.55	1.75048	0	1.59134	0	3.18269	6.89582	0	0	0	0	4.15871	0	0	13.7492	15.4466	0	2.06875	13.1551	9.7956	2.33397	0	0.97248	0	2.33397	4.38503	0.05304	0.03182	0.09901	0	1.68329	2.44006	0	7.92842	9.70366	1571	>500	3	1
OSTEO	2.91121	0.54585	12.6152	34.9345	10.5531	0	0.30325	0	5.82242	9.70403	0	0	0	0	4.07569	0	0	6.11354	3.39641	1.213	0.57617	9.86576	25.4124	7.58127	0	0.40433	0	5.57982	10.9979	0.03032	0	0.22642	0	2.60391	0.1213	0	4.77115	2.15106	1374	>500	12	1
IPB	0	0.79617	18.0467	56.7941	2.38854	0	2.65393	0	1.59236	8.49257	0	0.31847	0	0	1.4862	0	0.39808	9.6603	5.9448	1.06157	0.53078	13.4466	44.5418	1.99045	0	1.32696	0	3.45011	5.66171	0.04423	0.09288	0	0	0.49539	0.26539	0.39808	5.57325	2.2293	628	>500	1	1
IPB	0	0.41493	6.639	9.82019	2.90456	0	1.38313	0	0.41493	0	0	0.37344	0.77455	0	1.5491	0	0	0.2213	1.5491	0	0.27662	5.07146	7.21531	2.48963	0	0.92208	0	1.38313	0	0	0.20746	0.51636	0	0.51636	0	0	0.33195	0.51636	1205	>500	11	1
IPB	0	0.43402	8.10185	22.0631	6.51042	0.5787	3.97859	0	6.07639	19.9653	0.21701	0.1519	0	0	4.86111	0.86805	1.30208	3.15394	5.6713	2.89352	0.5787	5.11188	10.7301	4.1956	0.1929	2.2907	0	2.31481	10.8025	0.09645	0.0434	0.81018	0	2.70062	1.30208	0.50636	2.58488	3.24074	1152	>500	1	1
OSTEO	1.29116	0.64557	7.96213	10.2754	6.93996	0	1.34495	1.05444	4.84183	9.46847	0.02689	0	0.30126	0.16139	6.32666	0	0.24209	2.84054	7.53174	0.43038	0.45728	7.81866	10.2217	4.35765	0	1.70361	0.60253	6.88616	4.8777	0.01793	0	0.50211	0	5.42285	0	0.08069	2.60383	3.81608	1549	>500	12	1
IPB	1.41945	0	13.4847	9.40383	5.32292	0	0	0.6624	2.48403	9.46298	0.02957	0.03548	2.98084	0.17743	4.30565	0	0	3.31204	1.32482	0.47314	0.29571	9.06869	7.88581	3.07547	0	0.19714	0.88321	5.08635	5.67779	0.00985	0.01182	0.4416	0	4.52646	0.23657	0	2.92564	1.65602	1409	>500	12	1
IPB	3.30396	1.10132	11.0132	16.5198	5.78194	0	0.91776	0	8.25991	5.87372	0.18355	0	0	0	2.0558	1.10132	0	1.32159	1.0279	1.83554	0.3671	8.6882	11.931	4.77239	0	1.22369	0.68526	4.03818	4.16055	0.13766	0.00917	0.51395	0	1.71317	1.10132	0	1.48067	2.56975	908	>500	12	1
OSTEO	0	0	5.97907	5.97907	0	0	0	0	0	5.97907	0	0	0	0	8.3707	0	2.98954	17.7877	0	2.98954	0	5.48082	3.48779	0	0	0.62282	0	0	6.97559	0	0.07473	0	1.12108	4.18535	0	2.11759	11.9581	0	223	<300	1	1
IPB	0	0.98296	19.6592	19.0585	5.40629	0	1.36522	1.83486	3.27654	11.1402	0.79183	0.24574	4.58716	0	12.5382	0	0	3.45129	11.9266	0	0.87374	14.0527	12.2324	5.57012	0	2.63943	1.63099	1.85671	8.26416	0.26394	0.13652	4.17941	0.16382	8.66463	0	0.21843	1.55818	7.44139	1526	>500	1	1
IPB	5.35475	3.68139	3.56983	4.68541	2.00803	0	2.23115	0	2.67738	7.13967	0.44622	0	0	0	7.49665	0	1.33869	1.87416	1.24944	1.78492	0.44622	3.86732	3.56983	2.67738	0	0.37185	0	2.00803	4.75978	0	0.02231	0	0	4.78953	0.89245	1.00402	0	2.91537	747	>500	1	1
IPB	0	0	10.0218	11.5468	3.26797	0	1.08932	0	7.18954	6.97168	0	0.06535	0	0	2.44009	1.30719	1.19826	0.78431	0	4.79303	0.32679	8.27887	9.15033	1.30719	0	0.72621	0	4.57516	5.08351	0	0.07625	0.40668	0	1.42338	0.87145	0.38126	0.05809	1.22004	765	>500	1	1
IPB	0	2.06612	9.32401	12.9265	9.21805	0	2.11909	0.59334	2.86078	10.1716	0.10595	0.12714	0.59334	0	7.7135	0	0.95359	3.56008	0.59334	1.27146	1.05955	8.05255	5.84516	5.93346	0	1.32443	0.79112	1.69527	6.35728	0.28254	0.08476	0.89001	0.31786	4.94455	0	0.6887	2.67006	0.98891	1573	>500	1	1
OSTEO	0	2.37509	7.74103	13.3122	4.92611	0	0.58644	0.65681	5.9817	14.5437	0.58644	0.19352	0.65681	0	10.8374	0	0	2.58034	3.28407	0	0.32254	1.87661	3.42091	0.23457	0	0	0	2.11119	4.37876	0.09774	0.03518	0	0	3.28407	0.11728	0	1.37618	1.4231	1421	>500	1	1
IPB	2.53646	2.53646	11.6255	8.66624	5.54851	0	2.90636	0.88776	3.17058	14.3733	0.44916	0.3012	0	0.47558	7.39801	2.53646	0	21.9615	1.4796	0.42274	1.69097	10.3572	7.96167	5.12577	0	3.08251	0.59184	2.53646	7.04573	0.44916	0.19551	0.39456	0.58127	7.29937	0.7398	0	14.1055	1.87416	1577	>500	1	1
OSTEO	2.58231	0.16139	11.19	7.74693	3.22789	0	1.07596	0	3.22789	13.7723	0.13449	0	0	0	0.60253	0	0	4.43297	1.20508	1.72154	0.59177	7.60347	6.07919	3.44308	0	1.25529	0	1.93673	10.6162	0.21519	0	0.40169	0	0.60253	0	0	4.38993	0.80338	1549	>500	15	1
OSTEO	1.32538	0.33134	10.3821	8.28363	6.29556	0	3.58957	0	8.28363	11.2657	0.02761	0.03313	0.61851	0	1.54628	0	0	12.5911	1.85553	1.10448	0.22089	9.3513	4.87814	4.19704	0	2.20897	0	6.95825	10.1613	0.13806	0.03313	0.41234	0.33134	1.03085	0.22089	0	7.49577	2.68022	1509	>500	12	1
OSTEO	2.01342	2.01342	11.8568	18.2886	5.53691	0	0.27964	0	4.69799	17.4497	0.05592	0.13422	0	0	9.39597	1.67785	0.53131	4.51902	1.2528	1.11857	1.1745	6.4877	13.9821	3.57942	0	0.65249	0	3.13199	9.39597	0.0466	0.06711	0	0	6.05518	1.566	0	2.86353	1.6704	1490	>500	1	1
IPB	0	0	20.4604	11.2958	12.7877	0	0	2.38704	0	0	0	0	0	0	0	0	0	5.9676	0	0	0	22.7337	9.66184	4.4757	0	0	0	3.41006	6.82012	0	0	0	0	0	2.55754	0	3.18272	0	391	300-500	3	1
IPB	3.42173	0.64157	5.70288	13.9721	1.28315	0	0	1.59681	5.13259	1.42572	0	0	1.59681	0	3.99202	0	0	3.59281	1.59681	1.71086	0.46335	3.99202	7.34246	1.21186	0	0.47523	0.13306	2.28115	0.66533	0.02376	0	0.26613	0.07128	0.7984	0	0	2.10056	0.93147	1169	>500	11	1
OSTEO	0	0.23496	24.4361	11.9831	9.86842	0	0.7832	0	1.8797	5.01253	0.23496	0.11748	0	0.46992	6.14035	0	0	3.94737	0.87719	0	0.11748	18.3793	7.67544	6.26566	0	0.52213	0	1.8797	4.38596	0.01305	0.04699	0	0.15664	3.80117	0	0	2.63158	0.73099	1064	>500	3	1
IPB	0	0	0	0	0	0	0	0	0	0	0	0	0	0	0	0	0	0	0	0.22768	0.17076	3.87067	12.2382	2.21995	0	0.94869	0	0.45537	1.6697	0.00948	0.02846	0.31876	0	1.3813	0	0	0.10625	0.63752	1464	>500	11	1
OSTEO	13.0391	0.25075	12.3704	13.3735	7.77332	0	1.67168	0	9.02708	16.0481	0.04179	0.2006	4.68071	0.75225	3.74457	0	1.00301	13.2397	0.93614	7.3554	0.41792	11.3674	7.8569	7.52257	0	0.27861	0	7.02106	9.58431	0.02786	0.08358	1.87228	0	3.12047	0	0.94728	10.0412	0.31204	997	>500	1	1
OSTEO	0	2.08699	14.3527	10.5448	4.83304	0	3.29525	0	0.87873	10.8377	0.07322	0.13181	0	0	5.74107	0	0.21968	2.22613	8.20152	0	1.90393	11.6188	9.91017	2.92912	0	2.31888	0	0.29291	8.78735	0.13425	0.02929	0.41007	0	4.37415	0.14645	0.43936	2.22613	5.74107	1138	>500	1	1
OSTEO	5.00626	1.56446	11.6813	32.2278	14.393	0	0	2.33625	8.76095	20.8594	0	0.5632	0	0	11.0972	0	0.41718	5.17313	2.92032	2.50313	0.62578	8.76095	21.3461	8.23947	0	0.69531	1.16813	6.67501	12.3766	0.05214	0.42761	0	0	6.61939	0	0.41718	4.97845	3.115	799	>500	1	1
OSTEO	0	1.98413	0	0	0	0	0	0	0	11.9048	0	0	0	0	14.8148	3.96825	0	0	0	0	0	0	0	5.29101	0	0	0	0	10.582	0	0	0	0	0	0	0	0	0	126	<300	3	1
OSTEO	5.02008	1.63153	21.419	22.172	7.53012	0	2.0917	0.46854	6.0241	2.67738	0.08366	0.1004	3.27979	0	12.1821	0	1.58969	10.0402	7.49665	4.01606	0.75301	14.2793	7.97635	4.85274	0	3.20727	0.15618	4.85274	3.23516	0.19522	0.03346	0.93708	0	8.27755	0.33467	0	5.94601	3.43597	996	>500	1	1
OSTEO	0	0.65104	19.0972	48.9005	16.059	0	0	1.62037	8.68056	7.52315	0.18084	0.34722	2.83565	0	6.88657	0	0.5787	8.10185	3.24074	0	0.28935	11.8634	30.9124	13.0208	0	1.3262	0.27006	7.95718	5.78704	0.1085	0.48466	4.18596	0	6.34645	1.01273	0.14467	6.27894	2.16049	1152	>500	1	1
OSTEO	4.44162	1.03109	16.9205	20.2517	9.83503	0	4.23012	0.88832	9.20051	18.6125	0.58164	0.07931	1.18443	0	8.58714	0.63451	0.37013	10.11	10.0677	2.11506	0.71383	11.7033	11.7562	6.02792	0	1.76255	0.59221	5.81641	10.9983	0.38776	0	0.1974	0	7.55076	0.84602	0.54639	7.1348	6.41568	1576	>500	1	1
IPB	2.66667	1	9.77778	13.6667	9.66667	0	1.66667	2.48889	8	13.3333	0.05555	0	0	0.66666	4.97778	0	0	0	0	0.44444	0.77777	6.22222	9.7037	5.11111	0	0.92592	0.41481	3.11111	10.6667	0.18518	0	0	0.22222	5.18519	0.66666	0	0	0	750	>500	1	1
OSTEO	1.76367	1.54321	18.5185	19.7678	3.96825	0	1.46972	2.05761	2.6455	16.4609	0.36743	0	2.46914	0	27.9835	0.44091	2.82922	2.82187	9.87654	1.76367	1.39624	11.7578	17.1223	2.79248	0	0.24495	1.78326	2.6455	11.3659	0.26944	0.04409	1.09739	0	13.3059	1.17578	1.44523	2.17519	4.52675	1134	>500	1	1
IPB	1.98413	0	17.8571	4.29894	1.98413	0	1.65344	0	3.96825	13.2275	0.16534	0	0	0	5.55556	0	0	3.7037	0	0	0	16.7549	5.84215	1.98413	0	0	0	1.98413	0.88183	0.11022	0.06613	0	0	5.55556	0.33068	0	1.89594	0	504	>500	1	1
OSTEO	0	0	0	19.2308	0	0	32.0513	0	0	0	0	0	17.9487	0	0	0	0	17.9487	0	0	0	0	0	6.41026	0	5.34188	0	0	34.188	0	0	0	0	5.98291	0	0	0	17.9487	26	<300	12	1
OSTEO	0	3.99202	3.99202	8.15037	0	0	0	0	5.98802	3.99202	0	0.3493	0	0	17.6979	0	2.66134	0	3.72588	0.66533	0.58216	1.99601	6.2098	0	0	1.38612	0	3.32668	3.32668	0.16633	0.1996	0.93147	0	7.76225	0	0.44355	0	4.34686	501	>500	1	1
IPB	0	0	0	0	5.02513	0	0	0	0	0	0	0	0	0	0	0	0	0	0	0	0	0	1.67504	1.67504	0	0	0	0	0	0	0	0	0	0	0	0	0	0	199	<300	1	1
IPB	15.534	0.97087	15.534	19.5793	1.94175	0	0.80906	0	9.70874	0.64724	0.0809	0	2.71845	0	5.43689	0	0	2.97735	3.6246	0	0	8.84574	12.4056	2.10356	0	2.42718	0	4.20712	1.726	0.02696	0	0	0	3.32255	0	0	2.11435	4.22869	515	>500	1	1
OSTEO	0	0	4.3573	4.90196	0	0	0	0	0	0	0	0	0	0	18.3007	0	3.26797	0	0	1.08932	0	3.63108	3.26797	0	0	1.36166	0	0	0	0	0	0	0	13.7255	0	6.53595	0	0	306	300-500	11	1
IPB	0.79176	0.19794	13.46	9.69913	7.12589	0	0.9897	0.73898	0	5.27844	0	0	0	0	5.91185	2.3753	0.39588	4.27553	2.95593	0.79176	0.29691	10.205	4.02481	3.29902	0	0	0	0.79176	6.51007	0.08797	0	0.36949	0	3.07909	7.91766	0.13196	2.52485	1.97062	1263	>500	12	1
OSTEO	10.0503	11.7253	11.1669	12.2836	5.86265	0	4.1876	0	10.0503	36.8509	0	0	1.56337	0.83752	16.4154	0	12.1441	2.34506	0	9.4919	7.3981	8.37521	8.37521	3.35008	0	4.65289	0	2.23339	20.845	0	0	2.0845	0.83752	13.8098	0	5.79285	1.30281	0	597	>500	1	1
OSTEO	0.63051	0.78814	14.0816	11.8222	7.25095	0	1.05086	0	6.93569	13.8714	0.13135	0.07881	0	0.31525	6.47331	0.63051	0	5.80076	0	0	0.21017	10.5086	9.82556	5.93737	0	0.52543	0	3.0475	9.10747	0.15762	0.02627	0	0	4.70786	0.63051	0.57797	3.4188	0.19616	1586	>500	11	1
IPB	0.64308	1.36656	18.8639	17.0418	13.6656	0	2.67953	0	5.14469	9.86066	0.10718	0	0.60021	0.16077	6.00214	0	0.61629	4.24437	4.80171	1.50054	0.61629	11.2897	6.35941	4.34084	0	0.44658	0	4.50161	11.8614	0.01786	0	1.10039	0.75026	2.10075	0.42872	0.38406	3.43694	1.80064	1555	>500	11	1
IPB	2.62295	2.13115	4.37158	15.7377	4.91803	0	1.63934	0	1.96721	16.612	0.08196	0	0	0	4.89617	0	0	2.14208	0.61202	1.31148	0.9836	6.84882	9.38069	3.98907	0	0.54644	0	2.95082	10.2004	0.1275	0.01639	0	0	2.95811	0	0	2.14208	0.71402	1525	>500	13	1
IPB	5.07937	2.06349	11.0053	12.2751	9.68254	0	0.26455	0.29629	4.44444	12.9101	0.291	0.09523	0.59259	0.15873	7.11111	0.31746	0.23809	3.93651	6.81481	1.0582	0.5291	7.47795	9.02998	5.7672	0	1.32275	0.49382	2.85714	8.32451	0.20282	0.07407	0	0.47619	5.53086	0.10582	0.18518	2.3351	2.76543	1575	>500	1	1
OSTEO	0	0	6.1689	2.33993	5.1053	0	0.2659	0	1.59541	1.70177	0.02659	0.17549	0	0	0	0	0	1.78685	0	0	0.05318	3.61625	0.92178	2.65901	0	0.17726	0	1.59541	0.70906	0	0.0904	0	0	0	0.21272	0	0.44671	0	1567	>500	1	1
OSTEO	6.49351	3.73377	17.7489	35.0649	8.11688	0	7.30519	0	3.24675	15.5844	0.18939	0.06493	2.42424	0.64935	6.9697	2.5974	0.16233	0	3.0303	3.4632	2.11039	13.3478	18.9394	6.06061	0	3.51732	0.20202	1.94805	12.5541	0.10822	0.0974	2.0202	0.32467	5.05051	0.64935	0	0.61327	2.0202	1540	>500	11	1
IPB	0	1.03477	16.5563	4.96689	8.69205	0	1.37969	0	4.96689	4.41501	1.24172	0.08278	3.09051	0	8.4989	0	0	4.30464	7.72627	0	0	3.67918	1.37969	2.48344	0	0	0	1.65563	0	0.18395	0.02759	0.51508	0	1.03017	0	0	1.43488	1.54525	604	>500	1	1
IPB	1.90114	1.34664	11.6181	13.8889	7.28771	0	0.79214	1.47866	5.06971	15.2091	0.31685	0.22179	0	0.63371	20.997	0	0.47528	3.67554	3.5488	3.80228	0.79214	9.43529	15.2091	7.02366	0	1.49627	0.39431	1.79552	13.0968	0.5897	0.11089	0.49288	0.52809	15.6738	0.42247	0.24644	4.01352	1.97155	1578	>500	1	1
IPB	1.91939	1.19962	0	9.91683	2.87908	0	3.19898	0	0.95969	3.83877	0.47984	0	0	0	3.58285	11.5163	0	21.4971	3.58285	0.63979	0.55982	0	6.39795	1.75944	0	0.79974	0	2.23928	3.09234	0.31989	0	0.59714	0.15994	1.19428	16.3148	0.47984	15.0352	2.38857	521	>500	1	1
OSTEO	2.34375	2.05078	11.7188	8.07292	3.71094	0	2.27865	0.72916	1.5625	5.72917	0	0.03906	2.55208	0	11.3021	0	1.04167	4.01042	1.45833	0.52083	1.4974	7.11806	7.26997	3.58073	0	0.97656	0	0	5.12153	0.0217	0	0.97222	0.26041	6.68403	0	0	3.28125	1.09375	1280	>500	1	1
IPB	10.2669	2.31006	1.36893	8.21355	12.3203	0	0	0	0	12.3203	0.17111	0	0	0	1.9165	0	0	5.74949	0	2.73785	0.94113	0	7.47205	6.16016	0	0	0	0	7.30094	0	0.03422	0	0	1.9165	0.68446	0	2.0762	0	487	300-500	15	1
IPB	5.76553	1.76169	22.208	14.574	8.48815	0	1.06769	0	4.80461	7.90092	0.82746	0.01601	2.39163	0	8.96861	5.44523	0	3.84369	4.78326	1.70831	1.14777	17.2966	6.74425	5.28507	0	0.44487	0	2.24215	4.34195	0.13346	0	1.99302	0	5.87942	2.24215	0.07117	3.06783	2.49128	1561	>500	1	1
OSTEO	0	0	6.94444	2.5531	1.22549	0	0	0	2.45098	2.45098	0.10212	0	0	0	0	0	0	0	0	0	0	3.26797	1.70207	0	0	1.02124	0	0.81699	0.81699	0	0	0	0	0.76252	0	0	0.19063	0	816	>500	15	1
IPB	2.58732	2.58732	16.3864	10.1876	7.11514	0	1.61708	0	4.85123	7.11514	0.0539	0.14553	0	0.64683	1.20742	1.61708	0.75463	4.01035	0.6037	0.43122	1.40147	11.7867	6.09099	5.98318	0	1.79675	0	4.2044	5.24651	0.07187	0.1078	0.40247	0	0.90556	0.64683	0.30544	2.31422	0.6037	1546	>500	3	1
IPB	0	0.54764	10.2227	7.48448	8.4885	0	0	0	3.83352	16.0643	0	0	2.55568	0.54764	3.57795	0	0.82146	9.20044	0	1.82548	0.09127	9.24912	4.77668	4.56371	0	0	0	6.0241	14.3605	0.13691	0	1.02227	0.09127	2.89643	0	0.09127	4.42984	0.68151	913	>500	1	1
OSTEO	0	3.46021	10.842	10.6113	3.63322	0	4.90196	1.93772	1.38408	4.15225	0.54786	0.19031	1.61476	0.34602	17.1165	0.69204	0.69204	2.99885	4.52134	0	0.83621	8.84275	8.76586	3.46021	0	1.44175	1.07651	1.49942	2.46059	0.22106	0.10957	1.39946	0	8.71972	1.03806	0.11534	2.82968	3.55248	1445	>500	1	1
OSTEO	0	0.81566	4.35019	6.66123	2.44698	0	2.71887	0	4.89396	10.8755	0.06797	0	0	0	3.04513	0	0	2.28385	2.28385	0	0.40783	5.619	5.25648	1.63132	0	1.35943	0	4.89396	7.97535	0.1586	0	0	0	1.52257	1.63132	0	1.52257	0	613	>500	13	1
OSTEO	2.76243	0.86325	24.6317	30.4443	21.0635	0	0	1.28913	12.4309	22.5599	0.20142	0	0	0.3453	12.5691	0	0	8.05709	6.44567	0	0.20142	17.6489	22.0611	12.4885	0	0.28775	0	6.21547	15.0399	0.1055	0	0	0.1151	7.3051	0	0	5.93923	1.39656	1448	>500	11	1
IPB	0.65019	0.16254	1.30039	6.61032	1.95059	0	2.16732	0	1.30039	2.16732	0.24382	0	0.60684	0	1.82055	0.65019	0	1.34374	2.42739	1.73385	0	2.09507	4.33463	1.78804	0	0.63213	0	0.65019	1.73385	0.08127	0	0.20228	0.10836	1.2137	0.54182	0	1.02586	2.32625	1538	>500	1	1
OSTEO	4.004	2.002	16.016	4.83817	0	0	3.33667	0.93426	3.003	9.34268	1.001	0.1001	0	0	16.8168	1.001	0.5005	7.94127	10.2769	2.66934	1.75175	9.4539	2.39128	0	0	4.17084	1.24569	1.33467	6.22845	0.41708	0.16683	0	0	12.6126	1.33467	0.69513	6.40641	9.80981	999	>500	15	1
OSTEO	0	2.63678	16.4799	16.5898	5.76796	0	4.39464	0	3.95517	2.63678	0.02746	0	0.30762	0	7.38299	0	1.18106	7.49286	0	0	0.98879	12.3782	10.1626	3.68051	0	2.19732	0	3.07625	2.05083	0.09155	0	0.71779	0	4.10166	0	0.71412	4.37999	0.20508	1517	>500	11	1
IPB	3.18269	1.90961	12.3064	14.0569	8.59325	0	3.97836	1.1882	2.54615	15.0647	0.2387	0.01591	0	0.63653	17.823	0	3.26225	1.35795	2.07935	2.33397	1.19351	9.19443	9.67183	4.98621	0.14145	1.50294	0.69311	1.69743	12.4478	0.07956	0.0053	0.09901	0.10608	10.9909	0.10608	2.14831	1.11748	0.89115	1571	>500	1	1
IPB	1.31492	0.16436	17.9706	11.9439	8.54701	0	1.64366	0	1.31492	23.2303	0.02739	0.23011	0.61363	0	9.20447	2.62985	0.76703	5.12821	1.22726	0	0.16436	12.9301	10.8481	5.58843	0	1.64366	0	1.09577	16.4	0.1461	0.10409	1.12499	0.10957	7.2613	1.31492	0.42917	4.62415	1.63635	1521	>500	15	1
OSTEO	2.53968	0.47619	10.582	10.582	0.31746	0	1.0582	0.59259	1.26984	11.4286	0.05291	0.03174	0.59259	0	3.55556	0	0	2.79365	10.6667	1.69312	0.42328	4.93827	5.83774	0.42328	0	0.26455	0.39506	0.42328	6.94885	0.17636	0	0	0	0.19753	0.63492	0	1.2134	6.12346	1575	>500	3	1
IPB	1.90597	1.19123	13.13	12.2829	5.87675	0	0.79415	0	5.08259	19.4833	0.07941	0.03176	2.96485	0	12.7488	0.95298	1.0324	0.42354	6.22618	1.27065	0.23824	11.8594	7.37682	4.28844	0	0.52943	0	2.01186	13.4124	0.06176	0.02117	1.18594	0	8.4004	0.95298	0.31766	0.35295	3.06367	1574	>500	1	1
IPB	0	0.17135	16.9066	10.5666	10.7951	0	0	0.6397	2.7416	6.39708	0	0	0	0	7.03678	0	0.3427	1.59927	0.6397	0	0.37125	14.3173	9.08156	6.96824	0	0.47597	0.95956	1.82774	3.65547	0.01903	0.01142	0.10661	0	6.39708	0	0.11423	2.23136	2.13236	1459	>500	12	1
IPB	21.0084	1.57563	11.2045	3.15126	9.45378	0	0	0	8.40336	46.2185	0.17507	0	0	3.15126	1.96078	0	0	1.12045	3.92157	14.0056	1.05042	6.06909	0.70028	4.55182	0	0	0	7.70308	28.9449	0	0	0	2.10084	3.26797	0	0	0.9337	1.30719	476	300-500	12	1
OSTEO	2.28311	2.85388	4.31253	31.2024	3.04414	1.26839	4.75647	0	3.80518	13.6986	0.53906	0.13318	0	1.14155	19.1781	0	0.38051	2.23237	4.61695	2.28311	1.74404	3.63606	21.9009	1.52207	0.33823	3.69948	0	1.77575	11.3733	0.32766	0.05073	0	0.25367	13.4957	0	0.12683	2.00406	3.90665	1314	>500	1	1
IPB	0	0.47588	19.4585	12.6904	0.63451	0	0	0	6.34518	0.84602	0.2115	0.03172	2.36887	0.63451	10.6599	3.80711	0	4.61083	1.77665	1.48054	0.10575	13.6774	9.99365	0.84602	0	0.70501	0	4.44162	1.48054	0.15862	0.01057	0.2961	0.74027	6.11957	5.07614	0	3.5674	1.38184	1576	>500	13	1
IPB	0	1.66297	13.3038	2.58684	0	0	1.84775	0	0	5.91279	0	0	1.03474	0	8.2779	0	0.55432	0	0	1.4782	1.29342	11.8256	5.97438	0.73909	0	1.23183	0	2.21729	6.89825	0	0	0	0	6.20843	0.36954	1.17024	0.68982	0	451	300-500	13	1
OSTEO	1.25945	0.15743	10.4954	13.749	7.71411	0	1.31192	0	1.25945	15.1134	0.18366	0	0	0	6.75903	0.31486	1.83669	5.66751	1.17548	1.46935	0.57724	22.5301	20.0112	11.8598	0	1.22446	0.19591	5.35264	13.2942	0.18366	0.00524	0	0.31486	6.26924	0.62972	3.23608	5.20571	0.97956	1588	>500	11	1
OSTEO	0	0	0	0	0	0	0	0	0	0	0	0	0	0	0	0	0	0	0	0	0	0	0	0	0	0	0	0	0	0	0	0	0	0	0	0	0	0	1555	>500	1	1
OSTEO	0	0.47229	13.2242	15.2183	11.4924	0	0.52476	0	5.03778	10.9152	0.10495	0.03148	0	0.15743	8.52225	0	0.60348	7.7246	0	1.88917	0.52476	9.096	4.98531	6.40218	0	0.61223	0	3.88329	11.335	0.01749	0	0	0.15743	4.21215	0	0.05247	4.40106	0.09795	1588	>500	11	1
OSTEO	13.4228	7.55034	78.2998	74.1051	30.2013	0	22.3714	0	73.8255	55.9284	2.51678	9.1443	0	1.67785	57.9418	0	3.3557	37.2483	12.528	6.71141	4.75391	59.2841	49.0306	21.8121	0	12.5839	0	40.2685	41.7599	0.60589	4.94966	1.044	0.27964	38.1059	4.47427	1.305	32.3266	16.182	298	<300	1	1
IPB	0	0	15.5945	45.4435	1.46199	0	1.21832	0	7.30994	7.79727	0	0	0	13.8889	0	0	0	0	0	0	0.36549	6.82261	24.9756	0.48732	0	1.21832	0	6.33528	5.19818	0	0	0	8.89376	0	0	0	0	0	684	>500	11	1
OSTEO	0	2.14341	30.9171	32.2162	9.35308	0	1.94856	5.09223	4.28683	27.2798	0.29228	0.05845	0	0.77942	10.5482	2.72798	0	3.27358	5.09223	0	0.84437	16.7143	17.1473	4.41673	0	0.64951	1.57617	2.07846	8.40045	0.09742	0.03897	0.12124	0.2598	6.78964	0.77942	0	1.83597	2.54612	1283	>500	3	1
OSTEO	8.50159	0.92986	19.1286	3.36521	7.97024	0	0	0	5.3135	4.2508	0	0	0	0.53134	4.46334	0	0	3.96741	0	1.41693	0.30995	10.9812	2.24348	5.66773	0	0.14759	0	2.1254	4.72311	0.11807	0	0.99185	0.70846	3.14087	0	0	2.31432	0	941	>500	1	1
IPB	1.26502	2.05566	20.2403	25.3004	7.11575	0.84334	5.27093	1.77103	6.32511	16.7615	0.2899	0.09487	2.65655	0.63251	14.4634	0.63251	1.05419	1.05419	5.31309	0	0.26354	1.3353	2.47734	0.42167	0.14055	0.17569	0.19678	0.10541	1.40558	0.01756	0	0.39356	0	1.47586	0.21083	0.14055	0.02811	0.59034	1581	>500	1	1
IPB	1.66528	1.45712	9.43658	6.10602	0.83263	0	1.0408	0	2.49792	2.22037	0.20815	0	0	0.83263	7.7713	0	0	1.27671	1.55426	2.22037	1.5612	9.80664	10.0842	2.22037	0	1.50338	0	1.38773	5.73596	0.23128	0.06244	0.6476	0.69386	7.25321	0.27754	0	1.55426	1.55426	1201	>500	1	1
OSTEO	5.0665	2.13743	11.6107	9.2358	6.33312	0	0.52776	1.77327	1.26662	13.2996	0.02638	0	1.18218	0.15832	7.97973	0	0	4.89761	0.59109	1.89994	1.55689	9.28858	6.29794	3.69432	0	1.49532	0.59109	2.32214	9.78116	0.07036	0.01055	1.47773	0.31665	3.54655	0	0	5.19316	0.78812	1579	>500	3	1
IPB	3.22581	1.10887	9.13978	8.13172	1.81452	0	1.34409	0.75268	7.25806	2.41935	0.23521	0.04032	0	0	4.51613	2.41935	0.77284	3.70968	3.01075	1.07527	0.60483	6.2724	6.94444	0.26881	0	1.23208	0.37634	3.89785	3.58423	0.1344	0	1.00358	0	2.13262	0.94086	0.24641	2.65233	2.50896	1240	>500	1	1
IPB	2.01005	2.26131	5.36013	14.6566	3.01508	0	0	0	1.50754	11.3903	0	0.15075	0	0	16.4154	0	0	3.9866	1.87605	1.00503	1.00503	3.68509	8.90564	1.84255	0	0.27917	0	0	5.80681	0.13958	0.05025	0.31267	0	9.53657	0	0	1.87605	0.93802	995	>500	1	1
IPB	0	0.39872	10.6326	27.1132	0.79744	0	1.32908	0	2.39234	10.101	0.03322	0.11961	0	0	5.58214	2.39234	1.06326	2.44551	2.97714	0	0.19936	6.6454	16.3255	0	0	1.77211	0	0.79744	10.6326	0.06645	0.11297	0	0.19936	5.70618	1.06326	0.44302	2.17969	2.605	1254	>500	15	1
IPB	0	1.36662	11.1759	7.53158	10.5685	0	5.77017	1.36054	4.37318	11.6618	0	0.18221	0.34013	0	2.04082	0	0	1.36054	0	0	0.94144	7.36961	7.53158	7.89602	0	3.74555	1.13379	2.6725	13.2815	0.0911	0.10325	0	0	3.06122	0	0	0.79365	0.56689	1372	>500	1	1
OSTEO	0	0.77459	10.3279	0	0.77459	0	0.96824	0	9.29512	22.7214	1.22644	0	0	0	2.16886	0	0	2.7369	0	1.80738	0.48412	5.85248	0	0.25819	0	0.64549	0	2.96927	11.705	0.52715	0	0	0.12909	1.92788	0	0	1.58361	0.36147	1291	>500	1	1
IPB	12.4654	1.38504	11.0803	13.5042	5.54017	0	4.61681	0	1.38504	9.69529	0.11542	0	0	1.03878	9.04894	0	0.92336	2.26223	0	0.92336	0	2.3084	2.8855	2.19298	0	0.19236	0	0	1.53894	0.01923	0	0	0	2.36996	0	0.30778	0.64635	0	722	>500	1	1
OSTEO	0	1.42045	20.8333	4.85322	6.74716	0	3.55114	0	2.84091	11.3636	0.23674	0	1.32576	1.42045	9.94318	1.42045	0.71022	0.61553	0	0	0.94696	14.678	5.12942	3.43277	0	1.18371	0	2.60417	8.20707	0.23674	0.04734	1.32576	0.71022	6.84975	0.71022	0.67077	0.22095	1.54672	704	>500	1	1
OSTEO	2.53485	0.71292	10.1394	9.03042	4.11914	0	0.79214	0	3.80228	17.3215	0.26404	0.12674	0.29573	0	3.9924	0	2.11238	3.92902	4.73173	2.53485	0.89776	8.30869	6.19631	3.96071	0	0.61611	0	3.16857	10.4211	0.0528	0.02112	1.08435	0	3.64737	0.31685	0.5633	2.50669	2.16871	1578	>500	3	1
OSTEO	0	0.39432	8.67508	11.6325	12.224	0	0	0	5.5205	1.05152	0	0	0	0	0	0	0	1.1041	0	0.52576	0.26288	5.25762	5.34525	5.38906	0	0.9858	0	7.22923	0.3505	0.01095	0	0	0	0	0	0.52576	0.73606	0.12267	1268	>500	15	1
IPB	0	1.42948	13.7653	10.2711	6.19441	0	3.70606	1.77891	8.89454	17.3655	0.15883	0.07941	0	0.63532	15.1207	2.5413	0.63532	0.80474	4.44727	1.05887	0.42354	12.0006	8.3651	4.34138	0	1.41183	1.68008	4.65904	12.2829	0.04411	0.10059	0.19765	0.42354	8.59805	1.6942	0	0.84709	3.55781	1574	>500	1	1
IPB	1.53846	2.01923	11.5385	8.58974	6.15385	0	1.28205	0	1.53846	26.6667	0	0.11538	1.4359	0.38461	17.7692	0	0	3.10256	0.71794	0	1.02564	5.21368	5.17094	3.07692	0	0.96153	0.59829	1.28205	13.3333	0.0641	0.10897	0.23931	0.1282	9.45299	0	0	1.23077	1.19658	1300	>500	1	1
IPB	4.45293	1.27226	18.4478	20.2502	16.8575	0	1.32528	0	6.99746	7.63359	0.13252	0.19083	2.96862	0.95419	7.71841	0.95419	0.15903	5.34351	1.78117	2.75657	1.03372	11.8745	11.2383	9.06489	0	0.70681	0	3.39271	6.36132	0.09718	0.08481	1.18745	0.42408	6.03619	1.06022	0.47709	2.52332	1.18745	1572	>500	12	1
OSTEO	8.49257	1.2385	11.3234	11.9722	2.12314	0	0.88464	0	1.41543	13.2107	0.11795	0.07077	0.33026	0	1.9816	2.83086	0.4718	4.34065	0.66053	3.77448	1.2385	11.2448	11.0482	2.77188	0	0.19658	0	5.30786	8.17803	0.02948	0.01179	0	0	1.21098	2.83086	0.31453	2.72077	0.88071	1413	>500	13	1
IPB	5.15464	7.24871	21.4777	51.6001	18.6856	0	0.53694	0	12.8866	14.6048	0.24162	0	0	0	3.60825	0	1.93299	10.0516	0	1.71821	4.85932	16.8958	32.6461	12.8329	0	0.80541	0	8.91323	9.45017	0.30426	0.02684	0	0	3.30756	0	0.8591	7.06615	0	1552	>500	11	1
IPB	0	0	10.1394	0	0	0	0	0	0	0	0	0.19011	0	3.80228	0	0	0	0	0	0	1.26743	3.37981	0	0	0	0	0	0	0	0.10561	0.12674	0	2.53485	1.18293	0	0	0	0	263	<300	15	1
OSTEO	0	0.15822	11.1814	6.01266	1.58228	0	0.79113	0	0	3.37553	0.02637	0.04746	0	0	5.31646	0	0	1.18143	0.29535	0	0.21097	9.91561	8.24543	1.37131	0	0.43952	0.49226	1.26582	4.64135	0.02637	0.02637	0.29535	0.10548	3.5443	0.21097	0	1.37834	1.8706	1580	>500	3	1
OSTEO	2.80112	0.35014	20.5416	13.5388	9.45378	0	1.16713	1.30719	2.80112	13.0719	0	0.14005	0	0	8.49673	0	0	2.80112	7.84314	0.9337	0.11671	14.3168	9.6483	6.30252	0	0	0.43572	1.40056	6.53595	0	0.02334	3.05011	0	6.97168	0	0	2.89449	3.48584	714	>500	3	1
IPB	0.67114	0.33557	17.8971	21.085	8.05369	0	0	0	3.3557	9.39597	0.02796	0	0.62639	0	5.32438	0	0	5.68233	0.31319	0.44742	0.11185	15.138	14.5787	5.76063	0	0.27964	0	4.25056	6.71141	0.06524	0	0.41759	0	3.96719	0	0.07457	2.77405	0	1490	>500	11	1
IPB	0	0	14.7895	0.85324	11.0922	0	5.68828	0	0	0	2.84414	0	0	0	19.1126	17.0648	0.85324	0	12.7417	2.27531	4.124	28.4414	6.44672	11.3766	0.75843	7.58438	0	2.27531	6.82594	0.75843	0	6.90178	0.56882	22.2981	4.55063	0.56882	0	10.0872	293	<300	1	1
IPB	0	1.50889	16.5184	10.8535	3.33545	0	1.05887	0	2.5413	13.9771	0.05294	0.12706	3.26133	0	3.26133	0	1.32359	1.94833	1.77891	2.5413	1.50889	18.4244	10.2711	5.61203	0	1.58831	0	3.60017	10.3064	0.01764	0.07941	1.48242	0	4.64492	1.16476	1.04123	2.1954	1.38359	1574	>500	1	1
IPB	5.16796	2.74548	1.72265	11.1972	4.52196	0	1.07666	1.20586	1.29199	8.1826	0	0.06459	0	0.64599	2.41171	0	0	4.2205	1.20586	0.43066	2.79931	3.30175	13.4582	4.95263	0	0.35888	1.20586	1.93798	4.88085	0.05383	0	0	0	0	0	0	4.01952	0	774	>500	1	1
IPB	0	2.97974	5.56218	2.38379	2.38379	0	0	0	0	7.15137	0	0	0	0	1.11244	0	0.29797	0	2.22487	0	0.99324	5.82704	2.05271	2.78109	0	0	0	0	2.25136	0.04966	0	0.92702	0	1.48325	1.58919	0.49662	0.45027	3.1519	839	>500	1	1
IPB	0	1.13327	14.5059	7.70626	3.17316	0	2.26655	0	3.62647	19.9456	0.1511	0.09066	4.23089	0	8.46177	0	0	4.23089	5.07706	1.20882	0.67996	10.5772	2.99688	1.05772	0	1.00735	0	3.32427	11.2824	0.16369	0.09066	2.53853	0	6.34633	0.3022	0.20147	4.37191	4.23089	1103	>500	1	1
IPB	0	1.42857	16.0847	5.02646	7.14286	0.21164	2.1164	0.88888	5.71429	16.0847	0.23809	0.03174	0.88888	0	9.77778	1.26984	0.5291	2.45503	9.48148	0	1.85185	12.2046	3.40388	4.81481	0	1.32275	0.79012	3.49206	11.1464	0.17636	0.06878	0.19753	0.05291	4.44444	1.0582	0.43209	1.74956	6.22222	1575	>500	1	1
OSTEO	0	2.94019	21.2814	12.7688	6.38441	0.89605	5.60036	2.50896	4.03226	8.96057	0.19601	0.1176	0.62724	0.33602	11.2903	0.67204	0.16801	7.39247	5.01792	0.22401	1.34409	14.3369	7.98984	2.46416	0.29868	3.36022	0.5227	3.1362	5.37634	0.15867	0.0224	0.62724	0	5.12246	0.67204	0.20534	2.21774	1.88172	1488	>500	1	1
OSTEO	4.87211	8.22168	14.6163	9.2367	9.1352	0	0	0	0	7.71417	0	0.0609	0	0	4.5473	0	0	5.44052	2.27365	4.06009	4.7706	13.263	7.03749	7.30816	0	0.67668	0	0.406	9.33821	0.13533	0.0812	0.18947	0.406	6.06307	0	0.203	2.30072	0.37894	821	>500	1	1
OSTEO	0	0.70821	18.4136	19.4759	13.8102	0	1.47545	0	5.66572	13.22	0.23607	0	2.644	0	11.898	0.70821	2.12465	18.4136	0.661	0.94428	0.47214	13.6922	12.5511	11.2134	0	0	0	5.31161	11.4888	0.11803	0	0.88133	0.3541	5.39817	0.94428	0.82625	9.32483	1.983	1412	>500	11	1
OSTEO	5.46448	0.68306	4.55373	3.87067	2.73224	0	1.70765	0	0	5.46448	0	0	0	0	13.388	0	0	0.63752	0	3.18761	0.68306	4.85732	2.84608	1.36612	0	1.89739	0	0	2.42866	0.01897	0.0683	0.42501	0	4.67517	0	0	0.63752	0	732	>500	15	1
OSTEO	3.99202	0	13.9721	0.998	0.998	0	0	0	5.98802	0	0.16633	0.0499	0	0	0	0	0	6.52029	0	2.66134	0	8.20581	0.66533	0	0	0.55444	0	4.65735	1.33067	0	0.03326	0	0	0.62098	0	0.33266	3.41539	0.62098	501	>500	1	1
OSTEO	0.63532	5.71792	28.8014	22.8187	6.82973	0	1.58831	0	11.4358	12.2829	0.3706	0.06353	0	0.63532	13.9348	0	0.90004	0.29648	1.77891	1.90597	4.55316	17.7891	17.0126	5.87675	0	0.52943	0	9.63575	7.20034	0.07059	0.02117	0	0	7.80743	0	0.34413	1.43301	1.08711	1574	>500	1	1
IPB	0	0.30072	16.8404	12.8308	3.00722	0	0.33413	0	5.61347	16.7068	0.33413	0.10024	0.74846	0.40096	14.2208	0	0	3.12751	4.11655	0	0.33413	11.9398	7.86332	2.94039	0	1.33654	0.24948	4.81155	8.1529	0.03341	0.05346	0.74846	0.2673	5.61347	0.80192	0.55689	1.9959	1.9959	1247	>500	1	1
OSTEO	1.90355	1.82424	21.5736	16.8676	8.88325	0	1.32191	0	6.9797	13.5364	0.05287	0.1269	0	0.31725	6.21827	0	0.31725	5.3088	2.36887	1.69205	1.21616	15.0874	10.8044	6.13367	0	1.41004	0	4.23012	8.46024	0.10575	0.05816	0.1974	0.2115	4.04681	1.26904	0.2115	3.4123	1.57924	1576	>500	1	1
OSTEO	0	0	19.3548	10.7527	1.6129	0	0	0	0	4.30108	0	0	0	0	3.01075	0	0	0	0	0	0	12.9032	10.3943	3.22581	0	0	0	0	4.30108	0	0	0	0	3.01075	0	0	0	0	310	300-500	3	1
IPB	1.49925	0.74962	10.7446	6.62169	4.49775	0	0.62468	2.44878	2.24888	8.49575	0.24987	0.01874	1.3993	0	12.9435	0	0.74962	0.3998	1.74913	0.24987	0.74962	7.91271	5.37231	5.12244	0	0.20822	1.74913	1.74913	6.03865	0.26028	0	0.69965	0.06246	8.3958	0	0	0.06663	2.09895	1334	>500	1	1
IPB	1.26823	5.38998	19.2348	16.9097	1.42676	0	0.52842	0	11.4141	18.178	0.05284	0.33291	0	0	3.55105	2.53646	0	15.8952	0	0	4.09533	14.2324	11.2908	1.58529	0	0.79264	0	8.45487	10.7095	0.1321	0.1321	0.19728	0	1.18368	1.79666	0.14091	11.3859	0.4932	1577	>500	1	1
OSTEO	2.95639	1.10865	19.2166	72.4932	12.5647	0	0	0	8.13008	7.88372	0.06159	0.59127	2.06948	0	9.31264	0	0.18477	2.31584	4.13895	0.49273	0.98546	16.4244	38.4331	6.03597	0	0	0	6.89825	4.59883	0.14371	0.4065	1.37965	0	5.97848	0	0.12318	1.14971	2.29942	1353	>500	1	1
IPB	0	0.42158	12.3665	16.0202	1.68634	0	1.40528	1.57392	6.74536	6.74536	0.42158	0.16863	0.78695	0	8.65655	0	2.9511	1.79876	0	1.12423	0.56211	8.24433	12.0386	1.68634	0	2.34214	2.6232	6.74536	3.74742	0.18737	0	0	0.28105	6.42683	0	2.34214	0.52463	0	593	>500	1	1
OSTEO	0	0.99421	9.15883	5.24223	0	0	0.60255	0	0	3.13329	0	0.03615	0	0.36153	3.37431	0	0	3.37431	2.02458	0.96408	0.36153	5.86487	3.15337	0	0	0.4017	0	0.12051	2.85209	0.02008	0.03615	0.33743	0.06025	2.69945	0	0.16068	2.64321	1.34972	1383	>500	3	1
IPB	0.66445	3.8206	21.4839	17.4972	4.98339	0	2.76855	0.62015	3.65449	7.08749	0.13842	0	0	0	14.4186	1.66113	0.08305	3.23367	3.10078	0	0.80287	13.5105	7.43817	2.43632	0.07382	0.18456	0.62015	1.88261	3.13769	0.10151	0	0	0	8.68217	0.22148	0	2.02289	0.62015	1505	>500	11	1
IPB	3.97614	1.24254	13.6956	23.3046	6.62691	0	1.10448	0	4.63883	14.6896	0.05522	0.06626	0	0	8.04065	0	3.17539	7.37795	3.09256	1.10448	0.52462	13.8429	11.6891	4.19704	0	1.74877	0	3.97614	5.007	0.04602	0.03865	0	0.16567	3.19564	0	0.6903	2.35623	2.26787	1509	>500	11	1
OSTEO	5.31561	1.99336	8.41639	57.8073	3.65449	0	3.32226	0	1.99336	13.732	0.22148	0.06644	1.24031	0	0.31007	0	0.08305	21.6168	0.62015	7.53045	1.19048	8.12108	39.2396	3.26689	0	6.36766	0	1.55039	9.59764	0.46142	0	0.41343	0	0.93023	0	0.05537	13.0971	0.82687	1505	>500	11	1
OSTEO	4.78088	0.1992	25.7636	14.3426	5.17928	0	0	2.23108	7.56972	9.56175	0.1992	0.03984	0	0.3984	7.06507	0.3984	0.3984	1.85923	6.32138	2.12483	0.3984	18.5038	10.8898	3.91766	0	0.11066	1.73528	6.90571	6.1089	0.22133	0.01328	0	0.2656	7.80876	0	0.166	2.14254	5.45374	1255	>500	13	1
OSTEO	0	0.64474	0.85966	12.1427	0.96711	0	0	0	0.64474	11.1756	0	0	0.30088	0	10.23	0.64474	0	7.22115	9.02643	0	0.53728	1.8626	14.4889	1.39695	0	0.53728	0.10029	1.28949	6.73401	0.0179	0	0.90264	0	7.72262	0	0	4.79977	3.61057	1551	>500	13	1
OSTEO	0	0.80192	16.3058	16.1721	12.8308	0	0	0	7.61828	19.2462	0.06682	0.12028	0	0	4.49078	0	0	8.98156	4.49078	0.53461	0.36754	12.2071	9.19986	8.01925	0	0.22275	0	4.81155	13.1872	0.05568	0.06682	1.37218	0.13365	2.24539	0	0.06682	5.88969	2.99385	1247	>500	12	1
IPB	0	1.07991	11.7591	12.539	3.59971	0	0.59995	0	6.11951	3.83969	0	0	0	0	1.34389	0	0.35997	7.24742	0	0.47996	0.41996	8.15935	6.65947	1.79986	0	0.19998	0	2.27982	2.39981	0.05999	0	0	0.05999	1.79186	0	0	3.26374	0.44796	1389	>500	13	1
IPB	0	0	3.0349	5.69044	0	0	0	0	6.0698	6.0698	0	0	1.41629	0	7.08144	0	0	0	0	1.01163	0.50581	6.0698	6.32271	0.75872	0	0.84302	0	7.08144	9.69482	0	0.03793	1.41629	0.2529	7.08144	0	0.2529	0.87674	0	659	>500	11	1
IPB	1.54202	0.77101	11.3081	5.52557	1.54202	0	0	0	0.77101	3.08404	0	0.0771	2.15883	0	5.75687	8.09561	1.02801	2.62143	0	0.514	1.22077	8.05277	3.44813	0.77101	0	0.10708	0	0.514	2.9127	0	0.09637	0.95947	0.19275	2.87844	3.98355	0.34267	2.15883	0.23986	1297	>500	1	1
IPB	0	0	0	2.07756	0	0	0	0	0	9.23361	0	0	0	0	0	0	0	0.64635	0	0	0.23084	0	0.46168	0	0	0	0	0	1.23115	0	0.04616	0	0	0	0	0	0.75407	0	722	>500	1	1
OSTEO	1.998	1.4985	9.32401	13.4865	0.999	0	0.8325	0	0.999	9.32401	0.4995	0.14985	0	0.999	4.662	0	1.1655	0.9324	1.8648	1.998	0.41625	7.32601	10.1843	0.333	0	0.97125	0	0	5.55001	0.1665	0.0666	0	0.4995	2.7972	0	0.3885	0.1554	3.4188	1001	>500	3	1
IPB	0	1.40252	18.2328	10.8111	15.4278	0	1.75316	0	4.20757	14.9603	0	0	0	0	9.16316	0	0	4.06732	0.65451	0.4675	0.81813	12.0773	6.60355	9.81767	0	1.36357	0	4.67508	8.41515	0	0.00584	0	0.11687	4.36341	0	0	2.79726	0.65451	1426	>500	12	1
IPB	1.29116	1.45255	13.9875	11.2976	8.39251	0	0.80697	0	2.9051	11.4052	0.16139	0.03227	0.60253	0	4.21777	0.64557	0.64557	4.21777	1.20508	0.64557	1.21046	9.39674	11.0465	5.32602	0	0.7173	0	2.36712	6.8503	0.12552	0.04303	0	0	3.41439	0.53798	0.34072	2.0515	1.60677	1549	>500	13	1
IPB	4.45293	1.03372	12.0865	15.3732	8.42875	0	3.44572	0.59372	5.08906	9.75403	0.55661	0.22264	0.59372	0.63613	14.5462	0.95419	2.06743	6.57337	4.45293	1.48431	1.48431	9.68335	9.15324	5.51315	0.14136	1.23692	1.18745	2.8626	9.4713	0.29156	0.05301	1.38535	0.74215	9.59853	0.21204	0.5036	4.45999	3.16653	1572	>500	1	1
OSTEO	1.35777	1.86694	12.8988	10.1267	4.75221	0	1.98009	0	2.71555	18.1036	0.22629	0	2.53451	0	8.87079	0	0.50916	0.95044	5.06902	2.26296	1.35777	8.2975	4.92193	2.65897	0.30172	1.22577	0	3.39443	10.4096	0.10371	0.0396	1.16165	0	6.33628	0.22629	0.28286	1.08622	1.58407	1473	>500	1	1
OSTEO	0	2.35849	19.991	12.0171	2.35849	0	1.68464	0	7.07547	13.0279	0.25269	0	0.62893	0.33692	4.40252	0	0	4.60467	0.62893	0.89847	1.62848	13.1027	10.3886	2.4708	0	0.18718	0	4.60467	12.2791	0.48667	0.01123	2.20126	0	3.98323	0.78616	0.07487	4.13297	0.94339	1484	>500	13	1
OSTEO	0.68352	0.34176	4.329	10.7086	7.68968	0	1.70882	0	0.34176	14.5819	0.11392	0	0.63795	0.34176	11.1643	1.36705	0.34176	2.23285	3.18979	0	0.25632	4.40495	9.74026	7.40488	0	1.51895	0	2.1645	9.41748	0.05696	0	0.85061	0.22784	5.42265	2.05058	0.22784	0.74428	3.6151	1463	>500	13	1
OSTEO	0	1.37514	6.23396	2.75028	3.57536	0	0	0	0	15.4015	0.3667	0.30253	1.02677	0	5.13385	0	0	2.82362	0	0.3667	1.37514	6.11172	1.10011	0	0	2.75028	0	0.7334	11.7345	0.09167	0.03667	0	0	4.79159	0	0	2.04132	0.34225	909	>500	3	1
IPB	0.90009	0.78757	16.8017	5.77558	5.85059	0	0	0	6.75068	6.0006	0.22502	0.045	0.42004	0	7.56076	0.90009	1.0126	2.0102	2.10021	0	0.37503	10.9011	3.47535	4.50045	0	0.75007	0	3.90039	6.0006	0.15001	0.075	0.28002	0	4.76048	0.60006	0.85008	1.83018	3.36034	1111	>500	1	1
OSTEO	0	0.66269	26.7285	17.6165	2.48509	0	2.76121	0.92776	14.5792	8.39408	0.13806	0.03313	2.47404	0.33134	2.16479	1.32538	0	6.93616	4.32958	0	0.49701	18.7762	11.5787	2.15374	0	2.02489	1.13394	3.97614	6.18511	0.04602	0.02761	3.60798	0	1.23702	0.88358	0.33134	3.26191	1.23702	1509	>500	11	1
OSTEO	0	0	20.8741	15.9817	7.33855	0	0	0	3.91389	7.82779	0.16307	0	0	0	3.65297	0	0	3.19635	0	1.30463	0.81539	14.5684	9.40422	4.24005	0	0	0	3.91389	1.73951	0	0	0	0	1.21766	0	0	2.1309	0	511	>500	3	1
IPB	1.40647	0.87904	8.90764	7.38397	2.28551	1.17206	1.75809	0.65635	1.40647	7.50117	0.1758	0	0	0	5.25082	0	0.35161	11.955	0.98452	0.93764	0.61533	9.14205	4.76637	1.23066	1.2502	1.75809	0.65635	1.40647	4.21941	0.53719	0	0	0	2.62541	0	0.0586	8.79825	0.87513	1422	>500	1	1
IPB	1.32979	2.57646	11.5248	13.1871	7.8125	0	0	0.31028	2.32713	14.7385	0.16622	0.08311	0	0	13.0319	0.33244	0	1.55142	0.31028	1.10816	0.99734	8.56974	7.03679	4.21099	0	0.83111	0.10342	3.76773	7.20301	0.14775	0.04986	0	0.11081	5.27482	0	0.19392	1.25591	1.03428	1504	>500	1	1
OSTEO	1.96464	3.92927	11.4604	13.2613	7.12181	0	1.2279	0	3.92927	6.54879	0.08185	0	0.91683	0	7.79306	0.98231	0	0	0.91683	2.61952	1.6372	9.1683	9.11373	5.81205	0	0.54573	0.1528	2.94695	4.80244	0.05457	0.01637	1.22244	0	4.88976	0.98231	0	0.04365	1.06964	1018	>500	13	1
OSTEO	1.25786	1.10063	25.9958	17.8721	10.3774	0	1.04822	0	4.40252	14.6751	0.10482	0	0	0.62893	3.52201	3.14465	10.0629	7.84067	0.8805	0	0.36687	12.1593	9.78337	5.39832	0	0.1747	0.19566	2.51572	6.84836	0.06114	0.01572	0	0.10482	1.56534	1.04822	4.78686	4.60517	0.19566	1590	>500	11	1
IPB	2.57566	0.48293	9.44409	8.15626	4.18545	0	1.87809	0.60098	0.64391	0.85855	0.13414	0.12878	0	0.64391	5.10839	0	0.16097	3.30543	0.60098	0.42927	0.53659	5.15132	6.58224	3.21958	0	1.25206	0.40065	2.14638	1.71711	0.20569	0.01073	0.80131	0.64391	2.70444	0	0.05365	2.51842	0.60098	1553	>500	1	1
OSTEO	0	3.84615	0	0	0	0	0	0	0	0	0	0	0	0	0	0	0	0	0	0	5.76923	0.8547	0.64102	0	0	0	0	0	0	0	0	0	0	0	0	0	0	0	130	<300	1	1
IPB	0	1.58831	30.7073	11.9123	8.25921	0	1.05887	2.66836	8.57687	18.4244	0.21177	0	2.37188	0	15.4172	1.90597	0.79415	0	9.48751	1.05887	1.16476	19.1303	9.72399	4.28844	0	1.94127	2.07539	6.35324	10.9417	0.07941	0.02117	0.98828	0.10588	11.3652	0.63532	0.31766	0.19765	4.05196	1574	>500	1	1
IPB	10.4675	0.34891	16.2829	16.2829	10.1186	0	1.74459	3.90789	4.18702	24.1917	0.58153	0.06978	0.65131	0.17445	23.4473	0.69783	0.46522	1.79111	14.0033	4.18702	0.29076	11.7857	10.5451	7.32729	0	1.45383	3.03947	3.95441	11.7857	0.17445	0.03489	0.86841	0.1163	11.0723	1.62829	0.1163	1.62829	8.24998	1433	>500	1	1
OSTEO	4.79124	1.36893	11.4077	8.55578	2.73785	0	1.14077	0	0	13.6892	0	0	0	0.34223	8.62423	10.9514	1.36893	4.47182	0	4.56308	1.19781	9.12617	8.32763	1.483	0	1.14077	0.85177	1.14077	9.43037	0.01901	0	0	0.05703	5.21713	4.10678	0.4563	3.49836	0.42588	1461	>500	3	1
IPB	0	2.08768	2.78358	20.8768	3.13152	0	1.73974	0	0	8.35073	0.17397	0.31315	0	0	7.79402	4.17537	0	0	0	2.78358	0.86986	4.17537	12.8161	3.47947	0	3.76943	0	2.08768	4.63929	0.20296	0.20876	0	0	7.14451	1.39179	0	0.6495	0	479	300-500	1	1
IPB	0	0.56242	14.6232	15.748	7.87402	0	1.87477	1.04987	2.24972	17.6228	0.70303	0.25309	0	0	10.4987	0	0.56242	3.44957	6.29921	0	0.28121	11.6235	11.7173	5.15561	0	2.65592	0.34995	0.7499	11.2486	0.35933	0.06561	0	0	9.79878	0	1.28109	2.29971	6.64917	889	>500	1	1
IPB	6.97085	2.05957	18.1665	20.1732	15.2091	0	1.05619	0	10.4563	39.2902	0.50168	0.19011	0.59146	1.109	9.75919	0	1.26743	3.23194	3.84453	4.43599	1.37305	16.547	14.8747	8.29109	0	1.23222	0	5.49218	24.5036	0.42247	0.08977	0.29573	0.79214	7.19617	0	0.34326	1.98564	2.76017	1578	>500	1	1
IPB	2.8463	1.54175	35.7369	21.2682	11.6224	0	1.9766	0.88551	12.334	20.8729	0.07906	0.02371	1.77103	0	7.96964	0	0.23719	10.5946	7.96964	1.26502	0.31625	13.599	4.77019	4.26945	0	1.18596	0.29517	6.79949	12.6502	0.01317	0	1.77103	0	4.13241	0	0	3.98482	3.83723	1054	>500	12	1
OSTEO	0	3.02163	16.3274	23.4309	1.9084	0	8.48176	0	6.04326	11.4504	0	0.0318	0	0	6.2341	0.63613	0	2.67176	3.56234	0	1.72286	13.0761	15.1965	1.53732	0	3.00396	0	6.36132	8.76449	0.01767	0.0318	0	0	3.76025	0	0	2.29008	1.97908	1572	>500	13	1
IPB	0	0.82946	19.6859	2.65428	5.97213	0	1.10595	0.92899	3.64964	19.4647	0.11059	0.06635	0	0	0.61933	5.97213	0	6.76841	3.09666	0	0.05529	15.0409	1.69579	4.31321	0	0	1.34189	3.09666	12.4972	0.12902	0	0.41288	0	1.34189	2.65428	0.14746	3.6865	2.27088	1507	>500	1	1
IPB	1.97239	9.36884	7.88955	5.91716	2.95858	0	1.64366	0	1.97239	9.86193	0.16436	0	0	0	18.1788	0	0	0.26298	3.68179	0	6.49244	6.02674	5.17751	3.45168	0	1.9176	0	2.95858	8.76616	0.13697	0	0	0.16436	10.7386	0	0.16436	0.74512	3.37497	1014	>500	15	1
IPB	1.37174	1.45748	15.775	15.0892	6.85871	0	1.14312	0	2.40055	6.40146	0.11431	0.03429	2.56059	0.68587	9.92227	1.02881	0	3.29218	0.64014	0.91449	0.82876	13.7936	11.736	4.45816	0	0.47629	0	3.20073	1.98141	0.09525	0.03429	0.64014	0.28577	6.40146	1.02881	0.11431	3.04832	1.06691	1458	>500	11	1
IPB	3.17259	1.03109	16.0744	15.3342	6.82107	0	0.79314	0.59221	4.44162	7.1912	0.34369	0.23794	0	0	7.1066	0	1.34835	3.511	2.36887	0.84602	0.52876	10.5048	7.47321	2.74958	0	1.05753	0	0.95177	4.08911	0.18506	0.13219	0	0.05287	4.04681	0.42301	0.49351	2.04456	0.98702	1576	>500	15	1
OSTEO	0	0	0	0	0	0	0	0	0	0	0	0	0	0	0	0	0	0	0	0	0	0	8.41751	0	0	0	0	0	0	0	0	0	0	0	0	0	0	0	66	<300	1	1
IPB	1.2747	1.11536	21.2449	13.703	2.39006	0	3.98343	1.18972	8.92288	26.7686	0.77012	0.11153	1.18972	0	17.5483	0	1.59337	2.33694	3.27172	0.42489	0.53112	14.7298	8.51569	3.02741	0	2.1245	0	6.69216	16.1462	0.53112	0.07435	0.99143	0	11.2032	0	0.37178	1.08349	2.18115	1569	>500	1	1
OSTEO	0	0	32.0772	20.5249	10.5989	0	1.12158	0	3.36474	10.0942	0.67294	0.08411	0	0	6.90893	0	0	4.66577	5.9668	0.22431	0.16823	23.0298	14.8796	7.29026	0	1.30851	0	4.14984	8.71093	0.53275	0.06168	0	0	5.12936	0.22431	0	2.69179	4.39659	1486	>500	11	1
IPB	6.01504	1.8797	12.782	19.1103	2.81955	0	1.56642	1.05263	1.50376	18.1704	0	0.20676	0	0	5.61404	0	0.65789	4.5614	2.10526	10.0251	2.06767	9.60735	12.1554	1.94236	0	1.46199	0	1.8797	10.3592	0.07309	0.10025	0.11695	0.25062	3.74269	0	0.25062	3.50877	1.40351	1330	>500	15	1
OSTEO	0.615	2.5369	14.7601	7.53383	15.2214	0	0.76875	0	14.7601	17.7327	0.87125	0.23062	3.73104	0	5.45305	0	2.46002	3.71054	8.61009	0.205	1.43501	7.79008	3.57045	11.3264	0	0.25625	0.66967	9.32759	9.02009	0.95667	0.13837	2.39169	0	2.77436	0	0.64063	3.05453	6.2184	1626	>500	5	2
OSTEO	5.78592	2.4108	17.0363	10.3664	6.50916	0	0.8036	0	5.78592	5.14304	0.44198	0.19286	1.80006	0	3.15011	0	0.96432	4.05014	3.60013	2.57152	0.96432	8.67888	4.79481	4.018	0	1.87507	0	4.8216	2.78581	0.3884	0.07232	0	0	2.8501	0	0.8036	3.12868	2.10008	1037	>500	5	2
IPB	0	2.62697	18.6807	6.1296	5.69177	0	0.72971	0	7.00525	5.83771	0.07297	0.26269	0	0	8.99008	1.75131	3.50263	9.39872	0	0	1.24051	13.2322	3.9891	5.108	0	0.48647	0	6.42148	5.44853	0.09729	0.07297	0	0	5.99338	2.0432	2.48103	6.8885	0.54485	571	>500	5	2
IPB	0	1.65198	26.4317	5.9349	2.56975	0	0.30592	0	7.70925	11.9922	0.39769	0.07342	2.0558	0	17.4743	3.67107	1.46843	6.41214	3.0837	0	2.08027	14.0317	2.63093	3.73226	0	0.91776	0.22842	7.46451	6.40398	0.42829	0.01223	1.71317	0	9.65084	1.22369	2.44738	3.56502	0.68526	1362	>500	5	2
OSTEO	0	2.68097	19.6604	17.2029	2.68097	0	0	0	14.7453	10.7239	0.22341	0.26809	0	0	7.5067	0	2.68097	7.5067	2.50223	0	0	10.7239	8.19184	2.68097	0	0	0	15.1921	8.34078	0.59577	0.08936	2.50223	0	15.4304	0	1.78731	3.99166	2.50223	373	300-500	5	2
OSTEO	0	2.62763	21.2713	7.57007	6.00601	0	1.25125	0	10.5105	14.6396	1.12613	0.13138	2.1021	0	11.5616	0.75075	3.37838	4.004	7.00701	0	1.68919	11.3447	4.87988	4.44194	0	0.62562	0	7.25726	10.302	0.30238	0.06256	1.05105	0	10.6273	0.62562	1.5015	3.35335	4.43777	1332	>500	5	2
IPB	0	1.08319	9.82091	11.7706	7.79896	2.8885	0.72212	1.61756	8.23224	6.35471	0.46938	0.21663	2.42634	0	12.9405	0	1.40815	4.39053	0.80878	0	1.01098	8.37666	7.51011	4.83824	1.34797	0.36106	0.80878	5.48816	6.35471	0.43327	0.1372	0.80878	0	9.30098	0	1.80531	3.27364	0.94357	1154	>500	5	2
IPB	0	1.87266	3.74532	1.87266	5.61798	0	4.68165	0	3.74532	9.98752	1.87266	0	3.49563	0	0	0	0	0	27.965	0	1.56055	0.41614	4.57761	6.2422	0	9.88348	0	0	7.07449	0.3121	0	6.99126	0	4.66084	0	0	0.66583	12.8173	267	<300	5	2
OSTEO	1.60385	1.20289	27.8	8.1529	2.40577	0	1.33654	1.49693	15.6375	1.33654	0.20048	0.12028	2.99385	0	8.60732	0	2.10505	2.67308	25.4477	0	0.60144	21.4738	5.83623	0.93557	0	1.5593	0.99795	14.5683	3.2968	0.23389	0.02673	4.49078	0	5.73822	0	1.00241	2.01372	16.4662	1247	>500	5	2
OSTEO	0	0	0	0	0	0	0	0	0	0	0	0	0	0	0	0	0	0	0	0	0	0	0	0	0	0	0	0	0	0	0	0	0	0	0	0	0	0	1547	>500	5	2
OSTEO	0	1.34615	17.9487	17.3077	11.1539	0	0	0	5.38462	6.92308	0.0641	0	1.07692	0	5.74359	0	0.76923	6.30769	2.15385	0	1.92308	13.4188	14.7436	7.4359	0	0	0	5.38462	4.78632	0.0641	0	0.59829	0	7.4188	0	1.02564	6.15385	1.91453	1300	>500	5	2
OSTEO	0	0.33557	23.7137	2.68456	15.4362	0	0.55928	0.62639	8.05369	16.3311	1.39821	0.03355	2.19239	0	9.39597	0	3.18792	6.93512	6.26398	0.44742	0.67114	12.006	3.43028	8.72483	0	1.67785	0	7.60626	8.42655	0.54064	0.01118	0.52199	0	6.68158	0.78299	1.90157	4.99627	3.02759	1490	>500	5	2
OSTEO	5.24345	6.55431	7.49064	3.05868	18.7266	0	2.49688	1.39825	9.73783	3.99501	0	0	0	0	34.2572	0	0.93632	5.89263	3.49563	2.49688	3.05868	8.48939	3.22514	10.1748	0	2.91303	0.46608	5.24345	3.32917	0.3017	0	0	0	24.1198	0	0.24968	3.8119	3.49563	1335	>500	5	2
OSTEO	0	1.05863	9.98914	6.51466	3.4202	0	0.54288	0	5.86319	3.47448	0.24429	0.06514	0	0.32573	3.64821	0	3.25733	3.99566	2.12812	0	0.70575	7.88997	4.25262	1.52009	0	0.63336	0	3.58306	3.76402	0.16286	0.03257	0	0	3.04017	0	3.18494	2.12812	2.02678	1535	>500	5	2
IPB	2.53378	3.6951	10.9797	12.3874	8.02365	0	0	0	10.1351	8.72748	1.02055	0.04222	0	0	18.1306	0	0	4.39189	3.15315	2.81532	0.91497	9.8536	6.87406	3.94144	0	0.2346	0	5.3491	5.3491	0.76248	0.0563	0	0	13.795	0	0.28153	2.06456	4.46697	1184	>500	5	2
IPB	0	0	15.6585	0.75075	0.96525	0	0.53625	0	4.18275	3.861	0.72393	0.54697	0	0	5.10511	0	0	5.57701	2.4024	0	0.32175	7.57901	0.46475	1.23338	0	0.08937	0	1.716	4.862	0.143	0.20377	0	0	3.8038	0	0	2.574	1.6016	1554	>500	5	2
OSTEO	0	0	0	5.23062	0	0	0	0	0	0.95102	0	0	0	0	0	0	0	1.90204	0	0	0	0.317	2.37756	0	0	0	0	0	1.90204	0.07925	0	0	0	0	0	0	1.01442	0	701	>500	5	2
OSTEO	0	5.16322	11.7699	11.2148	11.3258	0	0.55518	0	5.996	6.21808	1.88763	0.36642	0.6218	0	5.28537	0.66622	0.66622	7.15079	2.48723	0	1.77659	10.7336	8.66089	6.55119	0	0.74024	0	5.996	4.29343	1.69332	0.13324	0.6218	0	2.27996	0	0.33311	3.67163	1.34725	1501	>500	5	2
OSTEO	0	0	0	20.8333	0	0	0	0	0	0	0	0	0	0	19.4444	0	0	0	0	0	1.73611	0	27.7778	0	0	0	0	0	0	0	0	3.24074	0	25.9259	0	0	0	0	48	<300	5	2
IPB	4.83092	5.03221	21.2024	11.2721	15.9018	0	4.69673	0	11.2721	16.6398	0.97289	0.16103	0.75147	0	23.2958	0	4.83092	3.3548	15.781	2.14707	2.34836	16.0136	9.95259	7.17928	0	3.80211	0	8.05153	13.4192	0.67096	0.06038	1.6282	0	12.9003	0	2.68384	2.8896	8.89247	1242	>500	5	2
IPB	0	1.27714	21.2857	11.6007	7.66284	0	0	0	7.02427	11.92	0.10642	0.06385	1.192	0	2.38399	0	0	3.66113	8.34398	0	1.06428	18.1638	6.49212	7.02427	0	0.70952	0	4.46999	7.37903	0.2838	0.04257	2.38399	0	1.98666	0	0	2.04342	5.16532	783	>500	5	2
OSTEO	5.4816	2.25137	7.3088	10.1801	3.91543	2.61028	1.63143	2.19264	9.00548	7.56983	1.95771	0.21534	0	0.78308	7.67424	0	1.76194	10.5456	5.84704	4.43748	1.33777	5.91664	6.65623	3.52388	0.52205	0.43504	0.48725	4.82903	4.48099	1.00061	0.09788	0.24362	0.78308	3.41077	0	0.64169	5.62081	3.41077	1277	>500	5	2
OSTEO	0	0	0	0	58.8235	0	0	0	0	117.647	0	0	0	0	0	0	0	0	0	0	22.0588	6.53595	0	24.5098	0	0	0	24.5098	39.2157	0	0	22.8758	0	0	0	0	1.30719	0	34	<300	5	2
IPB	0	0	2.12993	1.59744	0	0	2.66241	0	0	17.0394	0	0	0	0	0	0	0	5.96379	0	0	0	6.38978	0.70997	0	0	1.77494	0	5.32481	11.3596	0	0	0	0	0	0	0	5.46681	0	313	300-500	5	2
IPB	6.12423	0.87489	5.8326	15.019	1.74978	0	0	0.81656	5.68679	14.5815	0.32808	0	1.63313	0	7.34908	1.74978	2.47886	10.3237	7.34908	3.49956	0.58326	4.08282	7.43657	1.16652	0	0.12151	0.81656	3.35375	7.6796	0.34023	0.02916	1.63313	0	6.26033	0.87489	1.99281	6.13396	7.34908	1143	>500	5	2
OSTEO	3.67985	3.33487	14.7194	7.97301	7.35971	0	0	0	4.59982	6.7464	0.15332	0.04599	0	0	6.86906	0	0.91996	5.64244	0	1.83993	2.14658	12.5728	6.49085	3.83318	0	0.38331	0	7.20638	7.05305	0.49831	0.11499	0	0	4.43627	0	0.20443	4.12961	0	1087	>500	5	2
OSTEO	0	1.26263	13.468	18.5185	5.05051	0	0	0	2.52525	6.73401	0	0	0	0	0	0	0	1.3468	4.7138	0	0.84175	1.12233	6.03255	6.73401	0	0	0	6.73401	11.2233	0.14029	0	1.57127	0	1.57127	0	1.6835	1.79574	4.7138	198	<300	5	2
OSTEO	2.46305	1.53941	16.4204	0.61576	0.61576	0	0	0	6.15764	0	0.30788	0.2463	0.57471	0	1.14943	0	0	1.31363	1.14943	0.82101	1.23153	12.8626	0	1.33415	0	1.02627	0	5.13136	2.18938	0.17104	0.15394	0.38314	0	3.06513	0	1.23153	0.68418	0	812	>500	5	2
OSTEO	0	8.59454	10.7853	12.639	17.4419	0	0	0	4.55005	7.4149	0	0.05055	0	0	5.66229	0	0	13.2794	2.35929	0	6.06673	7.75194	8.22941	11.8807	0	0	0	3.37041	2.47163	0.15447	0.0337	0	0	4.87586	0	0.11234	7.9991	2.202	989	>500	5	2
IPB	0	1.16589	29.5359	4.27493	8.66089	0	1.94315	0	10.6596	16.4335	0.11103	0.16655	0	0	2.79813	0	2.44282	8.41661	5.28537	0	0.55518	18.1361	2.23925	6.66223	0	0.46265	0	5.77393	9.47516	0.64771	0.07772	0.10363	0	2.27996	0	0.77725	4.84122	4.87083	1501	>500	5	2
OSTEO	3.69004	2.02952	30.7503	26.3223	18.0812	0	1.23001	0	4.42804	3.19803	0.1845	0.1845	0.6888	0	3.78844	0	3.01353	8.51169	7.57688	0	0.615	22.3862	18.7987	9.9016	0	1.02501	0	2.21402	1.14801	0.451	0.0861	0.8036	0.246	3.21443	0	0.5945	5.01845	4.36244	1355	>500	5	2
OSTEO	0	1.48054	6.76819	8.74224	5.49915	0	2.11506	0.78962	1.69205	2.25606	1.41004	0	3.94811	0	22.899	3.38409	4.23012	23.2938	8.68584	0	0.98702	7.70822	4.93514	3.94811	0	1.41004	0	3.6661	9.40026	0.79902	0	2.89528	0	11.0547	3.38409	1.97406	13.0288	6.58018	591	>500	5	2
OSTEO	1.24844	0.70224	0.20807	6.8144	0.46816	0	1.04037	0	2.18477	0	0.52018	0	0	0	0	0	2.02871	0.43695	0	0	0.49417	0.20807	3.57192	0	0	0.69357	0	1.35248	0	0.22541	0	0	0	0.0971	0	0.33811	0.2913	0	1602	>500	5	2
OSTEO	0	0.71073	11.8455	18.4198	4.97512	0	0.59227	0	3.90903	19.9005	1.30301	0.03553	0.33167	0	20.8955	0	0.71073	10.2819	11.6086	0.23691	0.35536	8.13393	12.734	2.60602	0	0	0	2.84293	15.1623	0.9279	0.01184	0.11055	0	15.644	0.11845	0	6.87831	8.51299	1407	>500	5	2
IPB	13.0058	3.97399	30.5877	4.21484	20.4119	0.48169	1.20424	0	13.7283	21.6763	1.41498	0	0.33718	0	15.5106	0.72254	3.73314	4.76879	6.74374	7.94798	3.07081	17.4213	3.67293	10.7779	0.32113	1.40495	0	11.6811	10.5973	0.5118	0.08429	0	0	11.352	0.96339	2.60918	2.97848	4.27103	1384	>500	5	2
OSTEO	0	1.60256	20.2992	5.34188	9.61538	0	1.33547	0	12.8205	9.61538	1.60256	0	0	0	0	0	1.06838	0	0	0	0	21.0114	4.80769	8.27991	0	0	0.49857	11.7521	0.35612	0.35612	0.05341	0.99715	0	4.98575	0	1.06838	3.24074	2.49288	312	300-500	5	2
OSTEO	0	0.33046	9.91408	6.00353	4.2961	0	0	0.61687	6.60939	9.25314	0.02753	0	0.61687	0	19.1231	0.66093	0	17.0082	1.23375	0	0.16523	7.19689	6.26056	3.52501	0	0	0.20562	2.20313	5.72813	0.09179	0	1.33656	0	13.7769	0.33046	0	10.1344	0.92531	1513	>500	5	2
OSTEO	0	0	1.5949	13.7958	0.47846	0	0	0	2.87081	1.91388	1.63477	0	0.89314	0	1.33971	0	0	7.46411	1.78628	0	0	2.55183	10.8985	5.02392	0	0	0	2.39234	3.18979	1.03668	0	1.48857	0	2.53057	0	0	6.27326	0.59542	1045	>500	5	2
OSTEO	0	3.33969	24.173	17.1756	3.81679	0	1.59033	0	18.1298	16.5394	0.87468	0.57251	3.56234	0	23.1552	0	0	12.5954	3.56234	0	0.95419	15.6913	12.3516	1.59033	0	0.53011	0	8.90585	10.1781	0.9807	0.34987	3.56234	0	12.4682	0	0	6.40373	1.78117	524	>500	5	2
OSTEO	0	2.59516	20.7613	13.8408	1.7301	0	0	0	10.3806	9.22722	0.86505	0	3.22953	0	16.1476	0	0	8.99654	9.68858	0	0.28835	16.9166	8.84275	0	0	6.2476	0	2.30681	8.45829	2.83545	0	3.22953	0	9.15033	0	0	5.99769	7.53556	289	<300	5	2
IPB	0	0.17755	7.57576	11.4228	3.90625	0	0	0	0	4.73485	0.05918	0.07102	0	0	2.32008	0	0	0.85227	0.66287	1.42045	0.29592	5.83965	7.85196	1.89394	0	0	0	1.18371	3.78788	0.05918	0.09469	0	0	2.2096	0.11837	0	0.28409	1.6572	1408	>500	5	2
OSTEO	0	1.35092	13.1384	11.1782	6.19835	0	0.26488	0	7.9466	8.90019	0.15893	0.34965	0.89001	0	9.79021	0	0.63572	9.55711	2.37338	0.2119	0.71519	9.67719	8.31744	5.45666	0	0.52977	0	4.13223	4.80328	0.19425	0.09535	0.69223	0	4.25231	0.84763	0.63572	7.6358	2.1756	1573	>500	5	2
IPB	0	2.44927	18.6611	6.64801	13.9958	0	2.33263	0	7.69769	16.3284	0.554	0.10496	1.63284	0	9.79706	1.04969	3.49895	12.4096	5.55167	0	1.04969	12.7517	4.97628	10.8468	0	0.77754	0	3.38232	9.64155	0.62203	0.13995	1.30627	0	8.92621	0.58315	1.16632	8.40526	5.87824	1429	>500	5	2
OSTEO	0	0	29.4352	23.6675	10.1432	0	0	1.11376	14.3198	8.75099	0	0	0	0	8.35322	0.59665	7.1599	8.035	0.55688	0.39777	0.19888	17.7672	13.922	7.55768	0	0	0.37125	8.15434	3.71254	0.06629	0.02983	0	0	6.31132	1.19332	4.3755	5.86051	0	838	>500	5	2
OSTEO	0	0	3.67816	2.98851	3.44828	0	0	0	0	1.83908	0.11494	0	0	0	1.28736	1.37931	0	7.72414	0	0	0.45977	3.37165	1.68582	1.14943	0	0.38314	0	0.22988	0	0.15325	0	0.42911	0	2.57471	1.14943	0.30651	5.04215	1.71648	725	>500	5	2
IPB	1.87735	0.93867	12.5156	19.7121	5.31915	0	0.52148	0	7.50939	10.0125	0.44326	0	1.16813	0	8.17689	0	1.09512	13.058	0.58406	1.46016	0.62578	7.23126	9.33458	4.64122	0	0.78222	0	5.84063	6.67501	0.24335	0.02085	0.77875	0	5.84063	0.73007	0.2955	7.21736	0.77875	1598	>500	5	2
IPB	0	2.06349	20.1058	7.61905	13.1746	0	0.5291	2.07407	5.39683	11.9577	0.92592	0.09523	0.59259	0	5.62963	0	3.33333	7.87302	4.44444	0	1.53439	12.134	4.88536	8.46561	0	0.08818	0.98765	4.65608	8.53616	0.08818	0.06349	1.08642	0	6.22222	0	1.34921	6.17284	2.66667	1575	>500	5	2
IPB	0	1.89394	5.89226	7.36532	8.83838	0	3.15657	1.76768	6.94444	22.7273	0	0.25252	0	0	7.07071	3.15657	0	3.61953	7.07071	0.84175	0.31565	11.2233	3.85802	5.68182	0	1.05219	0.1964	7.36532	9.82043	0.26304	0.06313	1.37486	0	7.07071	1.89394	0.10521	2.07632	3.53535	792	>500	5	2
OSTEO	3.71747	0	19.4135	0.61957	8.6741	0	1.03263	0	11.1524	8.26105	0.30978	0	0	0	11.5655	0	2.68484	2.89137	2.31309	2.47831	0.30978	14.8699	0	6.60884	0.41305	0.68842	0	6.81537	5.50737	0.60236	0.02065	0	0	10.4089	0	1.06705	2.98775	3.08413	807	>500	5	2
OSTEO	0	1.28041	3.41443	1.92061	0	0	0	0	5.12164	1.70721	0	0	0	0	1.19505	0	0	2.98762	1.19505	0.4268	1.06701	3.55669	1.17371	0	0	0	0	4.69484	2.20515	0.2134	0	0.99587	0	2.19092	0	0	2.68886	0.79669	781	>500	5	2
OSTEO	0	0.16655	10.4375	7.10637	7.82811	0	0	0	7.32845	22.4295	0.99933	0	0	0	6.21808	6.99534	1.33245	7.32845	1.24362	0.88829	0.33311	7.10637	4.73758	3.66422	0.14804	0	0.6218	3.99734	14.3608	1.27693	0.0222	0.20726	0	6.83988	3.10904	1.83211	4.26382	1.55452	1501	>500	5	2
OSTEO	0	0.498	17.2643	4.23307	4.98008	0	0.83001	0	17.4303	20.5843	2.03353	0	0.4648	0	4.64807	8.46614	0	11.6202	0	2.65604	0	13.0589	3.59672	1.16202	0	0	0	12.9482	13.9442	1.35569	0.0166	0	0	2.1691	3.15405	0.332	10.4028	0	1004	>500	5	2
OSTEO	1.33601	3.08951	5.12135	4.95435	1.33601	0	4.45335	0	4.00802	8.46137	1.002	0.1002	0	0	5.92296	0	0.22266	4.67602	0.62346	0	1.80917	4.89869	4.00802	1.002	0	2.04112	0	2.56068	4.67602	0.19483	0.05566	0.51955	0	4.05255	0	0.55666	2.85014	0	1497	>500	5	2
OSTEO	0	3	13.3333	6.75	9	0	1.66667	0	5.5	8	0	0	0.46666	0	4.2	0	2.5	2.86667	4.2	0	2.04167	12.6667	5.02778	8.58333	0	1.38889	0	4.16667	6.44444	0.16666	0.05833	0.46666	0	4.97778	0	2	2.28889	3.42222	1000	>500	5	2
OSTEO	2.65604	4.48207	11.5095	8.30013	9.29615	0	0.55334	0	11.9522	14.1656	0.11066	0.3984	3.09872	0	4.3382	0.66401	0	9.11908	5.57769	2.21337	2.32404	6.34499	8.33702	5.20142	0	0.92223	0	5.09075	7.3779	1.27269	0.25453	2.27239	0	2.06581	0.22133	0	4.89892	3.3053	753	>500	5	2
OSTEO	0	0.35063	29.453	20.5119	14.7265	0	0	0.65451	7.71388	10.9864	0.49672	0.07012	1.30902	0	14.072	11.9215	2.80505	8.6489	2.61805	0.93501	0.93501	18.3107	13.3045	9.52548	0	2.62973	0.65451	3.50631	10.1293	0.18505	0.08181	2.61805	0.58438	9.92676	7.59701	1.87003	3.39723	1.74536	1426	>500	5	2
OSTEO	0	2.61976	7.73453	8.04641	11.9761	0	2.49501	0	5.98802	6.73653	0.71731	0.13098	2.44511	0	7.68463	0	1.49701	6.58683	4.19162	0	2.12076	8.0672	5.61377	7.48503	0	1.35146	0	3.61776	4.74052	0.37425	0.03742	1.39721	0	6.17099	0.2495	1.74651	4.25815	2.79441	1336	>500	5	2
OSTEO	5.00939	2.19161	12.5235	27.7604	5.32248	0	1.04362	0	3.75704	16.4892	1.90461	0.09392	1.75329	0.31308	6.72094	0.62617	0.62617	1.2106	28.0526	5.00939	2.03507	7.93154	19.6897	2.40033	0	0.60878	0	2.71342	13.5671	0.86968	0.07305	1.9481	0	4.28581	0.62617	0.62617	1.47499	20.5524	1597	>500	5	2
IPB	0	0.5535	8.11808	8.61009	8.48708	0	3.07503	1.37761	2.21402	4.67405	1.41451	0.01845	1.37761	0	16.5314	0.738	3.81304	4.72325	9.9877	0	1.23001	5.49405	5.26855	4.30504	0	1.33251	0.8036	3.69004	5.74006	0.615	0.0492	2.18122	0	6.54367	0.492	1.96802	3.13243	7.92128	1355	>500	5	2
OSTEO	0	2.14521	16.0616	13.5313	11.8812	0	0.55005	0	6.60066	7.48075	0.46754	0.099	0.30803	0	5.85259	0	1.32013	6.16062	0	0.44004	1.65017	12.1745	9.27759	8.08581	0	0.3667	0	5.17052	5.17052	0.60506	0.19801	0.61606	0	4.51779	0	0.27502	4.54712	1.43748	1515	>500	5	2
OSTEO	0	0.15605	9.3633	5.4099	4.99376	0	0.52018	2.33042	7.49064	8.32293	0.96233	0.15605	0	0	10.7782	0	4.36954	5.99251	13.1086	0.62421	0.36412	6.38091	2.82633	2.86101	0	0.08669	0.7768	4.99376	6.65834	0.44215	0.09883	0	0	6.50576	0.41614	2.18477	4.41115	13.2057	1602	>500	5	2
IPB	0	0.51975	2.079	6.23701	11.4345	0	4.33125	0	0	12.474	0.08662	0	1.9404	0	11.6424	0	0	0	1.9404	4.158	0.693	2.31	3.234	7.79626	0	2.02125	0	1.386	9.70201	0.8085	0	2.9106	0	7.11481	0.693	0	0.8316	6.79141	481	300-500	5	2
IPB	0	3.00842	18.4517	10.3289	6.91937	0	0	0	3.61011	6.41797	0.10028	0.1805	0.56157	0	7.86201	4.81348	6.61853	2.88809	5.61572	0	1.80505	14.0393	9.39297	7.22022	0	0.33426	0	3.20899	2.40674	0.66853	0.06016	2.62067	0	8.2364	3.61011	2.80786	1.79168	2.99505	831	>500	5	2
OSTEO	0	2.49546	13.0067	10.5112	5.44465	0	0	0	6.35209	29.6431	1.02087	0.13611	0.84694	0	6.77556	3.62976	0	3.1458	7.19903	0.30248	0.90744	12.4017	8.44424	2.41984	0	0.88223	0	7.41077	23.0893	0.34029	0.01512	1.41157	0	4.23472	3.0248	0	2.60133	5.08167	1102	>500	5	2
OSTEO	0	6.71312	30.1382	19.2046	12.2366	1.35962	2.26603	1.90347	17.675	24.0199	1.61455	0.28891	0.63448	0	8.24836	0	3.85225	4.03354	6.34489	0.90641	2.15273	20.0922	12.4821	5.66508	0.30213	0.75534	1.37473	14.3893	16.542	1.08581	0.13596	0.63448	0	6.13339	0.6798	2.56817	3.35373	4.65292	1471	>500	5	2
OSTEO	0	0.77228	24.7131	9.04678	12.3566	0	1.47102	0	10.15	9.56164	0.11032	0	0	0	13.5922	2.64784	0	4.82495	1.64754	0	0.4413	17.4561	5.36923	9.26743	0	1.22585	0	6.32539	3.43238	0.33097	0	0	0	10.4344	2.05943	0.2942	2.51054	1.37295	1133	>500	5	2
IPB	0	0	35.6589	8.13953	8.13953	0	3.87597	2.17054	23.2558	6.20155	0.58139	0	2.17054	0	19.5349	0	4.65116	7.90698	10.8527	0	1.74419	28.9406	6.00775	7.55814	0	4.52196	2.17054	14.7287	2.06718	0.74289	0	0.72351	0	14.1085	0	3.10078	7.64858	7.23514	430	300-500	5	2
OSTEO	0	0	8.77193	8.99123	0.65789	0	1.09649	0	5.26316	7.01754	0	0	9.82456	1.31579	7.36842	0	0	5.26316	0	3.50877	0	5.26316	7.74854	0.87719	0	0	0	4.82456	7.01754	0.10964	0.1535	6.95906	0.87719	7.36842	0.43859	0	2.33918	0	380	300-500	5	2
OSTEO	0	0.9337	32.991	19.141	7.93651	0	0	0	12.1382	19.6078	0	0.04668	2.17865	0	11.329	0	1.40056	9.52381	2.17865	0	0.77808	20.5416	14.4465	6.1469	0	0.90777	0	8.87021	11.2045	0.47982	0.08558	1.74292	0	11.4742	1.08932	0.31123	5.85123	1.59768	1071	>500	5	2
OSTEO	0	3.55656	7.86491	24.867	14.2262	0	2.02406	0	3.46981	8.79019	0.34698	0.10409	1.9431	0	7.12468	0	3.35415	3.46981	3.23849	0	2.02406	7.24805	17.4069	9.13717	0	1.25299	0	2.42887	5.86013	0.53011	0.08096	1.5113	0	7.55648	0	2.08189	3.53921	3.67029	1441	>500	5	2
OSTEO	0	0	0	25.1572	16.5094	0	0	0	0	12.5786	0	0	0	0	8.80503	0	0	5.03145	17.6101	0	0	0	10.4822	14.1509	0	0	0	4.71698	12.5786	0	0	0	0	2.93501	0	0	4.19287	5.87002	106	<300	5	2
OSTEO	2.70636	1.52233	17.3658	5.86378	8.11908	0	0.56382	0.94722	10.1488	8.11908	0.84573	0	0	0	8.20929	0	1.35318	8.43482	6.31484	1.35318	0.9585	11.9531	2.53721	5.41272	0	0.65779	0.52623	7.89355	6.46519	0.84573	0.01127	0.52623	0	6.31484	0	0.37588	4.37528	4.52564	1478	>500	5	2
IPB	0	0	15.8311	13.8522	1.31926	0	0	0	15.8311	6.15655	0	0.39577	0	0	0	0	0	15.1275	4.92524	0	0.21987	14.0721	4.17766	0.65963	0	0.36646	0	13.1926	4.98388	0.73292	0.21987	0	0	1.23131	0	0	15.2155	4.10437	379	300-500	5	2
OSTEO	0	0.9715	9.06736	19.2142	17.8109	0	0.53972	0	3.23834	12.0898	0	0	4.83592	0	10.8808	0	3.56218	7.77202	0	0	0.53972	7.34024	13.8889	11.4421	0	0	0	2.37478	12.0898	0.64766	0	5.23892	0	9.67185	0	2.80656	6.13126	0.40299	772	>500	5	2
OSTEO	0	1.57123	30.2607	20.426	5.93575	0	0	0.97765	9.77654	13.9665	0.64013	0.05237	2.28119	0	21.1825	0	0	4.65549	8.14711	0	1.16387	16.527	15.3437	4.71369	0	0	0.65176	6.63408	8.22471	0.45585	0	1.52079	0	14.1217	0	0.15518	4.43048	5.75729	1432	>500	5	2
IPB	0	1.93424	39.9742	13.7008	15.4739	0	0	0	11.6054	15.1515	0.96711	0.09671	1.80529	0	13.0883	0	0	6.3185	0	0	0.72533	26.6495	10.5308	8.86525	0	0.26864	0	6.76983	10.3159	0.6716	0.11283	0.60176	0	9.47776	1.93424	0	4.72813	2.10617	517	>500	5	2
IPB	1.82815	2.17093	14.0158	5.78915	7.54113	0	1.90433	2.55941	5.48446	10.3595	0.41895	0.11425	3.41255	0	11.5174	0	0.91407	9.01889	2.55941	0.30469	1.37112	12.3908	4.72273	4.11335	0	1.65042	0.85313	1.82815	6.90636	0.33008	0.07617	2.27504	0	9.24233	0	0.91407	4.34694	1.56409	1094	>500	5	2
IPB	0	1.03093	12.8293	8.36197	7.56014	0	2.57732	0	12.3711	26.1168	0.02863	0.15463	0.64146	0	9.62199	0	0.68728	3.11569	3.8488	0	0.97365	9.31653	6.3383	5.84192	0	0.57273	0.21382	9.96564	14.6621	0.27682	0.05727	1.49675	0	7.80451	0.22909	0.60137	1.83276	5.34555	1455	>500	5	2
OSTEO	0	3.14153	28.6596	14.5503	16.5344	0	0	1.23457	13.5582	9.70018	0.22045	0.0992	0.30864	0	16.0494	0	1.65344	5.42328	6.79012	0.22045	2.86596	20.8701	8.5244	10.1411	0	0.27557	0.61728	9.58995	8.15697	0.24801	0.06613	0.92592	0	13.2716	0	2.4526	3.50529	2.46914	1512	>500	5	2
OSTEO	0	0	13.8169	14.6805	0	0	0	0	0	0	0	0	0	0	0	0	0	7.25389	0	0	2.15889	8.05987	4.60564	0	0	0	0	0	0	0.07196	0	0	0	7.25389	0	0	3.22395	0	193	<300	5	2
OSTEO	0	1.48699	20.0743	3.71747	10.2231	0	3.09789	0	12.2677	21.3135	0.58859	0	1.73482	0	6.93928	0	2.97398	7.83147	6.59232	0	1.1772	14.2916	2.43701	6.44362	0	2.06526	0	9.16976	12.9698	0.95002	0	1.15655	0	5.89839	0.24783	1.40438	3.46964	6.01404	1345	>500	5	2
OSTEO	5.54401	2.59875	11.55	26.334	6.23701	0	0	0	9.70201	21.714	0.05775	0.1386	0.6468	0	5.17441	0	0.693	3.6498	3.234	1.617	1.21275	7.62301	14.553	3.5805	0	0.1925	0	7.16101	11.242	0.04812	0.0693	0.8624	0	3.4496	0	0.462	2.7258	1.7248	1443	>500	5	2
IPB	0	0.95724	8.93427	13.295	3.35035	0	1.59541	0	15.9541	3.08445	0.93065	0.12763	1.19124	0	12.8058	0.95724	3.50989	7.53031	4.16933	0	0.93065	9.00518	8.47337	2.49947	0	2.92491	0	7.55158	3.1199	0.45203	0.05849	3.57371	0	7.64376	1.70177	1.70177	4.63731	2.58101	1567	>500	5	2
IPB	3.45304	3.10773	29.4659	20.2578	6.56077	0	2.87753	1.12799	7.59669	11.2799	0.97836	0.13812	0	0	8.05709	0	2.58978	3.72928	0.96685	0.92081	2.76243	19.5672	13.0256	4.5465	0	2.78161	1.28913	5.29466	7.36648	0.59468	0.05179	0.42971	0	6.87538	0	2.70488	2.6857	2.25599	1448	>500	5	2
OSTEO	7.25295	5.32638	12.6927	12.3904	9.51949	0	1.88879	0	5.43971	16.3191	0.07555	0.18132	0.84617	0	20.3083	0.90661	1.81324	11.7256	1.69235	0.60441	2.87096	8.96545	6.24559	5.28861	0	1.13327	0	5.43971	10.6779	0.27702	0.09066	0.28205	0	11.8465	0.90661	0	6.97089	1.97441	1103	>500	5	2
OSTEO	0	0.16589	0.66357	5.97213	0.33178	0	0.27648	0	9.28998	3.98142	0.9677	0.03317	1.54833	0	2.47733	0	0.66357	3.36209	1.54833	0.22119	0.16589	1.32714	5.01364	0.44238	0	0.36865	0	5.86154	2.2119	1.14282	0.01105	0.92899	0	0.61933	0.44238	0.55297	2.04969	1.13544	1507	>500	5	2
OSTEO	0	3.08099	13.4977	4.69484	9.6831	0	0	0	8.80282	3.52113	0	0	0	0	3.28638	0	1.76056	5.04695	1.64319	2.93427	1.61385	7.82473	2.1518	5.28169	0	0.48904	0	3.2277	7.62911	0.51349	0	0	0	2.19092	0	0	3.71674	2.19092	568	>500	5	2
IPB	2.71739	1.69837	6.34058	9.90716	7.13315	0	0.84918	0.63405	8.15217	12.9076	0.9341	0.03396	9.8279	0	17.4366	0.67934	11.2092	2.03804	5.07246	6.34058	1.75498	4.60447	9.09571	2.60417	0	2.4532	0.84541	7.8125	7.77476	1.13225	0.02264	7.71437	0.11322	10.2506	3.39674	2.56643	2.07579	4.86111	1472	>500	5	2
OSTEO	5.78406	2.24936	23.1363	15.5848	18.7982	0	0.53556	0	9.6401	18.4233	0.96401	0.1446	1.19966	0	20.0943	0	4.01671	3.94173	17.0951	2.35647	1.44602	16.1382	8.28335	13.389	0	0.80334	0	5.2485	13.4247	0.42844	0.07497	1.3996	0	12.2965	0	2.08869	2.57069	8.69751	1556	>500	5	2
IPB	2.87977	0.53995	37.437	18.4185	8.63931	0	0	0	9.35925	11.2791	0.29997	0.03599	0	0	9.40725	0.71994	0	4.9916	2.01584	1.43988	0.29997	21.6783	9.91921	4.31965	0	0	0	4.79962	3.67971	0.11999	0.02399	1.00792	0	7.72738	0	0.23998	2.30382	0.78393	1389	>500	5	2
OSTEO	0	1.70898	16.9271	17.0898	15.625	0	0	0	1.95313	5.20833	0.32552	0.09765	0.91145	0	8.20313	0	4.39453	3.45052	4.55729	0	0.65104	8.46354	9.00608	10.2539	0	0	0	0.32552	3.47222	0.73242	0.09765	0.60763	0	6.98785	1.30208	1.98025	1.82292	1.21528	512	>500	5	2
OSTEO	0	0	0	11.3636	0	0	0	0	0	15.1515	0	0	0	0	0	0	0	0	0	0	0	0	10.7323	7.57576	0	0	0	0	30.303	0	0	7.07071	0	3.53535	0	11.3636	0	0	88	<300	5	2
OSTEO	0	0.26824	4.29185	6.08011	4.82833	0	0	2.00286	2.14592	7.15308	0.17882	0	1.00143	0	5.00715	0	0	4.57797	0	0.35765	0.17882	2.86123	5.3052	2.77182	0	0	0.66762	4.82833	5.24559	0.11921	0	0.66762	0	2.00286	0	0	3.12351	0.33381	932	>500	5	2
IPB	0	1.89873	24.8945	6.75105	8.86076	0	1.58228	1.18143	7.59494	13.7131	0.71202	0.09493	0	0	11.8143	0.63291	1.89873	4.13502	3.24895	0	0.89662	18.4247	5.1512	5.06329	0	1.40647	0.39381	5.27426	6.61041	0.3604	0.03691	0.1969	0	7.28551	0.63291	0.63291	2.98172	3.05204	1580	>500	5	2
OSTEO	0	3.36066	15.3005	11.53	4.2623	0	2.18579	0	3.27869	6.55738	0	0	0	0	12.2404	0	0.9836	1.87978	3.67213	0.43715	1.63934	8.30601	5.79235	3.27869	0	0.91074	0	0.87431	2.47723	0.39162	0	0.61202	0	8.67031	0.21857	0.05464	0.93989	0.81602	1525	>500	5	2
IPB	0	5.37893	10.0621	9.3663	3.05074	0	2.40848	1.19889	3.2113	0.42817	2.27467	0.12845	0	0	6.29416	0	0	2.9544	0.89916	0	2.78313	8.20667	5.12025	1.92678	0	0.62442	0.59944	1.39156	1.81974	2.14087	0.06957	0.29972	0	3.09712	0	0.28544	2.9544	0.69935	1557	>500	5	2
OSTEO	0	2.48509	32.6927	21.0404	14.4135	0	3.31345	0	5.96421	5.30152	0.33134	0.06626	0	0	7.73139	0	0.66269	5.96421	3.09256	0	1.49105	18.7026	12.3334	10.9896	0	0.82836	0	3.31345	4.41794	0.58905	0.04417	1.23702	0	4.53575	0	0.80995	3.40917	2.47404	1509	>500	5	2
IPB	0	0.75757	17.284	11.6723	9.76431	0	1.40292	3.45679	7.40741	5.05051	0.30864	0.08417	0	0	12.2559	1.3468	0.22446	3.23232	3.77104	0.22446	0.36475	14.6652	5.34979	6.90236	0.14964	0.74822	1.25701	4.0404	4.48934	0.06546	0.08978	0	0	5.23756	0.78563	0.71081	2.36438	2.82828	1485	>500	5	2
OSTEO	0	2.35373	5.15579	3.36247	2.35373	0	1.12082	0.62766	4.70746	7.17328	1.20489	0	0.31383	0	0.31383	0.67249	1.00874	3.76597	1.88299	0	1.79332	2.31637	2.55922	3.02623	0	0.65381	0	3.36247	5.00635	0.75655	0	0	0	0.31383	0.78457	2.7647	1.92782	2.71987	1487	>500	5	2
IPB	2.9304	2.5641	32.7228	15.873	14.1026	0	1.221	0	8.42491	22.9548	0.06105	0	0	0	6.83761	1.8315	31.5018	6.59341	5.47009	0	1.03785	22.2222	9.05576	9.52381	0	1.32275	0	6.83761	16.4428	0.63085	0.01221	0	0	4.78632	1.7094	21.8559	4.09442	3.87464	1365	>500	5	2
IPB	0	0.58139	3.10078	8.33333	5.52326	0	0	0	2.32558	3.10078	0.09689	0.17441	0	0	1.08527	0	1.74419	4.4186	1.62791	0	0	3.61757	4.55426	3.87597	0	0	0	1.74419	1.55039	0.08074	0.05813	0	0.77519	1.98966	0	0.77519	2.95866	1.08527	860	>500	5	2
OSTEO	1.24146	1.24146	19.2427	19.7083	8.06952	0	4.91413	0	3.72439	22.7602	0.569	0.35692	1.44838	1.24146	5.21415	0	0.41382	2.02773	5.21415	0.41382	1.13801	14.0699	12.5526	4.96586	0	2.06911	0	4.03476	16.0356	0.3276	0.20691	0.38623	0.10345	1.93117	0.41382	0.06897	1.30354	2.70363	1611	>500	5	2
OSTEO	8.13008	0.50813	15.5827	4.91192	8.13008	0	1.69377	0	8.13008	8.13008	0	0.4065	0	0	17.0732	0	1.35501	5.2168	3.79404	2.71003	0.33875	9.48509	2.65357	1.69377	0	1.12918	0	4.74255	7.67841	0	0.30487	0	0	9.48509	0	0.45167	4.11021	1.89702	492	300-500	5	2
OSTEO	0	0	14.0845	7.98122	4.22535	0	2.34742	0	8.4507	9.38967	0.23474	0	0	0	13.1455	0	0	2.62911	5.25822	0	0.23474	9.38967	6.80751	3.75587	0	1.17371	0	5.6338	8.13772	0.03912	0	0	0	9.64006	0	0	1.00156	1.75274	355	300-500	5	2
OSTEO	0	1.69722	21.9507	8.59923	5.43109	0	0	0	10.8622	3.39443	0.56573	0.03394	0	0	17.4248	1.35777	5.60081	3.53021	8.23716	0	1.0749	13.7286	6.03455	4.52591	0	0.18857	0.2112	10.4096	7.69405	0.81089	0	0.84483	0	11.4053	1.13148	1.86694	3.22848	3.80177	1473	>500	5	2
OSTEO	0	1.54594	19.4346	10.3062	6.18375	0	5.88928	0	1.76678	18.8457	0.29446	0.26501	1.649	0	6.596	0	10.0854	7.53828	6.596	0	1.17786	13.1527	6.13467	4.26973	0	3.43541	0	5.00589	9.03023	0.1963	0.07361	1.09933	0	3.298	0	1.59501	4.78995	7.97016	566	>500	5	2
IPB	0	1.37268	16.9298	6.17708	6.52025	0	1.71585	1.92176	5.49073	11.439	0.25737	0.03431	0	0	1.92176	0	1.02951	1.55571	3.20293	0	0.85792	10.1426	4.07992	3.37451	0	0.47662	0.64058	4.00366	4.72813	0.3241	0.05719	0.42705	0	2.56234	0	0.80073	1.38794	2.02852	1457	>500	5	2
OSTEO	0	0	1.61812	19.4175	0	0	0	0	9.70874	0	0.20226	0.24271	0	0	9.06149	0	0	3.39806	0	0	0.60679	14.5631	12.945	0.80906	0	0	0	4.85437	0	0.40453	0.28317	0.75512	0	3.39806	0	0	1.88781	0	206	<300	5	2
OSTEO	7.79221	1.7316	13.8528	17.7489	10.6061	0	1.443	0	7.79221	12.1212	0.93795	0	0.80808	0	2.42424	0.8658	0.4329	7.44589	4.84848	4.0404	0.54112	13.3718	13.5883	9.37951	0	0.60125	0.80808	6.63781	9.42761	0.37277	0.01443	0.53872	0	2.15488	0.8658	0.32467	4.82924	1.61616	1155	>500	5	2
IPB	0	0	26.999	17.9128	10.9034	0	0	0	0	9.34579	5.71132	0	2.90758	0	0	0	0	4.15369	2.90758	0	0	18.3454	6.92281	4.6729	0	0	0	0	6.92281	0.47594	0	0	0	0	0	0	5.81516	3.39218	321	300-500	5	2
IPB	1.38122	3.53936	11.2799	18.9917	5.35221	0.2302	2.30203	0	8.6326	7.36648	0.66183	0.10359	1.9337	0	11.9245	1.03591	1.20856	8.42541	3.8674	0	1.95672	7.67342	12.335	2.24448	0	1.15101	0	5.52486	6.02363	0.39326	0.02302	1.39656	0	9.13137	0.8057	1.87999	5.0798	2.14856	1448	>500	5	2
IPB	0	1.89121	13.6888	5.82373	4.14265	0	1.50096	0	7.20461	14.6494	0.18011	0.23414	0.33621	0	13.1124	0	2.52161	9.67819	3.69837	0.24015	1.14073	9.60615	3.2821	3.122	0	1.50096	0	6.48415	9.36599	0.35022	0.15609	1.12072	0	8.51745	0	2.52161	7.73295	2.80179	1388	>500	5	2
IPB	1.26103	3.7831	9.8781	5.46448	8.82724	0	0.52543	0	10.7188	19.9664	0	0	8.82724	0	5.59058	0	0.78814	9.20555	3.5309	0	2.20681	8.75718	3.81813	7.35603	0	0.26271	0	9.1425	16.1833	0.23644	0.0105	4.5117	0	3.62898	0.21017	2.50455	8.18972	3.62898	1586	>500	5	2
OSTEO	0	3.01205	13.61	19.8572	6.69344	0	5.02008	1.87416	5.35475	11.8251	1.67336	0.3012	0.62472	0	20.3034	1.33869	4.1834	11.5797	4.99777	1.33869	2.42637	11.5276	13.3125	5.07586	0	2.13818	0.41648	3.79295	7.28841	1.00402	0.13944	1.87416	0	13.7439	1.11557	2.45426	6.32902	5.83073	1494	>500	5	2
OSTEO	1.26502	3.16256	17.9212	19.6606	5.37634	0	1.05419	0	9.17141	9.6985	0.26354	0.15812	0.59034	0.63251	8.55998	0	1.42315	7.59013	4.42758	0.63251	1.3968	12.5799	13.1773	4.79654	0	1.84482	0	5.90344	4.07618	0.42167	0.08433	0.9839	0.42167	5.90344	0	1.79211	4.06213	3.34528	1581	>500	5	2
IPB	0	3.25325	24.3577	11.7618	3.003	0	2.5025	2.8028	10.5105	18.018	0.66733	0.02502	1.86854	0	7.47414	0	4.004	3.83717	7.47414	0	1.66834	16.7946	7.89679	3.08642	0	1.39028	0.31142	8.34168	11.5671	0.68123	0.03336	1.55711	0	4.98276	0.66733	1.66834	3.02525	6.69558	999	>500	5	2
OSTEO	1.24301	1.39838	8.28672	20.9758	8.3903	0	0.77688	2.03025	6.21504	5.8007	1.81272	0.03107	3.48042	0	13.6317	9.01181	0.93225	4.70271	7.54092	1.03584	0.20716	8.97728	12.4301	4.19515	0	0.17264	0.58007	6.52579	4.28147	1.33796	0.01035	3.5771	0	7.73427	8.3903	0.69056	2.69318	4.64056	1609	>500	5	2
OSTEO	1.25471	0	1.67294	7.42367	2.19573	0	0	0	5.64617	5.85529	0.20911	0.04705	1.46382	0	0.87829	0.62735	7.05772	5.89711	0.58552	1.25471	0.10455	0.62735	4.28691	1.20243	0	0	0	5.01882	5.29764	0.21783	0.04182	1.17106	0	0.7807	0.62735	3.81639	2.71853	0.39035	1594	>500	5	2
OSTEO	0	1.81999	15.4423	17.0968	3.97088	0	3.58482	0	1.98544	11.4714	0.3309	0	0	0	2.77962	0	0	3.35319	1.23538	1.32363	1.07545	9.7066	10.5155	2.53695	0.36767	1.83837	0	1.65453	8.2359	0.06434	0	0.82358	0	3.29436	0	0	2.00015	0.92653	1511	>500	5	2
OSTEO	0	0.71633	5.73066	2.86533	4.29799	0	0	0	0	15.2818	0	0	0	0	0	0	0	0	0	0	0.47755	2.54696	3.1837	2.86533	0	0	0	0	6.3674	0	0	0	0	0	0	0	0	0	349	300-500	5	2
IPB	0	2.81762	20.4918	9.81899	7.17213	0	1.28074	0	9.22131	12.2951	1.06728	0	1.43443	0	9.0847	0	2.47609	2.66393	2.86885	0	1.70765	14.1166	5.97678	4.61066	0	0	0	6.31831	6.8306	1.05305	0	1.11566	0	7.17213	0	3.10223	1.20674	2.86885	976	>500	5	2
OSTEO	0	3.55114	20.202	3.78788	5.68182	0	3.15657	0	9.4697	22.7273	0	0	0	0	7.07071	3.78788	9.4697	2.52525	10.6061	0.63131	1.1048	15.362	1.89394	0.31565	0	1.05219	0	7.57576	13.468	0.10521	0	0	0	1.76768	1.89394	8.20707	1.09428	7.07071	528	>500	5	2
IPB	0	0.42401	16.2822	29.8508	4.74898	0	0.28267	0	11.194	13.1162	0.28267	0.13568	0.94979	0	5.06558	1.01764	0.90456	4.79421	1.2664	0.90456	0.19787	10.3271	20.3905	4.91859	0	0.56535	0	7.91497	11.6086	0.18845	0.0848	1.79406	0	2.21619	0.33921	1.69607	3.13584	1.05533	1474	>500	5	2
IPB	0	0.80437	15.6585	10.3496	7.88288	0	0.53625	0	3.861	11.583	0.75075	0	1.2012	0	12.9129	0.6435	0.6435	2.9172	0.9009	2.145	0.69712	10.582	6.91763	4.23638	0	1.60875	0.1001	3.11025	10.153	0.62562	0.01608	0.8008	0	8.60861	0.2145	1.0725	2.39525	2.2022	1554	>500	5	2
OSTEO	1.35962	1.18967	22.4337	12.6898	7.138	0	0.5665	0	9.51734	17.2218	0.5665	0.06798	1.58622	0	16.814	1.01971	3.28575	5.16655	7.61387	0.4532	1.07637	14.5026	6.40154	4.19216	0	0.37767	0	5.66508	11.1791	0.54762	0.01133	1.26898	0	8.98859	0.1133	0.75534	3.2933	4.01843	1471	>500	5	2
OSTEO	0	1.80288	28.8462	14.0224	2.40385	0	0	0	16.8269	0	1.20192	0	2.24359	0	6.73077	0	0	6.73077	6.73077	0	0	13.6218	8.34669	2.40385	0	0	0	5.60897	0	0.06677	0	2.24359	0	3.73932	0	0	4.11325	1.49573	416	300-500	5	2
OSTEO	3.82166	0.71656	7.21868	11.8365	5.41401	0	1.06157	0	3.82166	10.6157	0.15923	0.12738	0	0.4777	1.78344	1.27389	0.15923	13.673	2.9724	2.54777	0.63694	5.37863	8.20948	3.34395	0	0.9731	0	2.65393	7.36023	0.44232	0.07961	0	0.21231	1.18896	0.63694	0.02653	11.0403	1.38712	1570	>500	5	2
IPB	3.80228	0.71292	10.7731	9.5057	18.0608	0	0	0	7.60456	12.6743	0.47528	0.04752	0	0	3.5488	0	3.80228	3.67554	1.7744	1.90114	0	8.23828	5.70342	12.3574	0	0.26404	0	3.16857	8.44951	0.10561	0	0.29573	0	5.61893	0	1.58428	2.6616	2.36586	526	>500	5	2
IPB	0	0.45454	15.1515	17.9546	4.09091	0	0	0	7.27273	0.60606	0.07575	0.0909	0.84848	0	3.39394	0	1.36364	10.303	10.1818	0	0.98484	10.404	14.5455	3.48485	0	0.37878	0	5.30303	0.50505	0.15151	0.04545	0.28282	0	3.39394	6.21212	0.60606	8.82828	1.83838	1100	>500	5	2
OSTEO	0.68634	3.17433	15.7859	7.43537	13.8984	0	1.42988	0	5.49073	10.5239	0.40036	0	0	0	11.5305	1.02951	3.5461	9.49439	8.32761	0.45756	2.77396	11.8966	6.25334	8.57927	0	2.09716	0	2.74537	5.41447	0.25737	0.01143	0	0	7.68703	0.91512	1.9351	7.22947	5.9788	1457	>500	5	2
OSTEO	0	2.21088	11.3379	9.46712	1.70068	0.45351	1.41723	0	13.2653	7.70975	1.04875	0.13605	0	0	6.34921	0	0.5102	5.21542	6.03175	0	2.01247	10.9599	6.16024	1.92744	0.30234	0.66137	0	8.95692	5.21542	0.33068	0.15306	0	0	4.65608	0	0.22675	3.13681	7.08995	1470	>500	5	2
OSTEO	0	1.55602	6.91563	3.97649	3.11203	0	0	0	12.4481	10.3734	0.25933	0.0778	0	0	5.32503	3.11203	16.0788	15.906	8.71369	0	1.25346	5.30198	1.49839	1.98824	0	0.5763	0	7.26141	6.68511	0.15848	0.06915	1.45228	0	3.06593	1.72891	6.74274	11.0881	4.84094	964	>500	5	2
OSTEO	0	1.16202	3.76273	5.86543	3.81806	0	0	0	1.99203	0.44267	0.02766	0.0498	0.92961	0	4.64807	0	1.32802	2.3683	0.61974	0.66401	0.30433	4.13162	5.79165	2.04737	0	0.27667	0	0.88534	0	0.05533	0.0166	0.51645	0	4.02833	0	0.66401	2.22075	0.20658	1506	>500	5	2
IPB	0	0.23832	10.1684	19.3041	5.24309	0	0	1.3346	8.5796	3.17763	0	0	0	0	6.22815	0	3.81316	9.02447	1.77947	0.31776	0.3972	9.00328	11.7572	3.81316	0	0.3972	0	6.35526	4.5546	0.29128	0	1.18632	0	5.19013	0.31776	2.78043	4.06737	0.88973	1049	>500	5	2
OSTEO	0	1.42694	12.1766	7.22983	6.27854	0	2.37823	0	10.274	19.0259	0.19025	0	0	0	5.32725	0	0	5.85997	6.92542	0	0.76103	7.10299	4.56621	4.18569	0	0.95129	0	4.94673	12.0497	0.28538	0	1.06545	0	3.90665	0	0	4.79452	3.90665	876	>500	19	3
OSTEO	6.99301	0.87412	9.1121	14.5688	1.27146	0	1.05955	0	1.90718	12.2907	0.95359	0	0	0	14.8337	0.95359	0.63572	3.34817	22.2505	2.11909	0.66221	3.74373	8.77658	0.31786	0	1.9425	0	1.27146	4.94455	0.10595	0	0.19778	0.2119	10.7791	0.74168	0.28254	1.3986	12.3614	1573	>500	9	3
OSTEO	0	7.61516	11.6394	21.9787	4.45765	0	1.23824	0.69341	2.22883	2.97177	0.34051	0.26002	0.3467	0	9.01436	2.22883	0.18573	4.45765	3.81377	0	3.59089	7.51197	17.7274	2.84794	0	0.61911	0.92455	2.47647	4.29255	0.17541	0.16716	0.69341	0	4.39161	1.11441	0.15477	2.37741	3.23593	1346	>500	8	3
IPB	1.514	2.55488	0.50466	10.2826	0.56775	0	0	0	0	1.00934	0.12616	0	2.82614	0	15.1905	3.78501	0	1.94297	2.82614	1.00934	1.57709	0.16822	8.03264	0.31541	0	0	0	0.50466	0.50466	0.27336	0	1.0598	0	8.24291	3.02801	0	1.47195	2.00185	1321	>500	9	3
IPB	0.72939	0.36469	13.6154	16.9584	8.93508	0	1.21566	0	7.29395	6.80768	0	0.07293	0	0	3.74423	0	0	10.3331	3.40384	2.43132	0.06078	11.2651	13.433	4.86263	0	1.82349	0	4.74106	4.37637	0.08104	0.03646	0	0	4.31153	0	0.12156	6.07829	3.85769	1371	>500	8	3
OSTEO	0	2.49252	7.3114	15.1213	0	0	0.83084	0	5.48355	1.32935	0.54004	0.02492	2.79163	0	10.7012	2.99103	0.4985	0	0.93054	0	1.37089	5.87128	7.89299	0.24925	0	0.13847	0	2.99103	2.65869	0.40157	0	2.94672	0	7.9096	0	0.41542	0	1.24072	1003	>500	9	3
IPB	1.27226	2.30598	14.419	6.99746	10.1781	0	1.59033	0	8.58779	20.3562	0.05301	0.19083	1.18745	0.31806	3.56234	0	0.42408	2.37489	1.78117	2.33249	0.90118	10.1074	4.3469	5.61917	0	0.08835	0	7.10348	13.7122	0.07951	0.0212	1.78117	0.21204	3.66129	0	0.21204	2.82019	1.58326	1572	>500	4	3
OSTEO	2.02224	0.50556	10.7853	6.06673	4.29727	0	0.8426	0	4.04449	10.7853	0	0.10111	0.47185	0	4.71857	0	0.67408	3.53893	5.19043	0.67408	0.67408	3.14571	3.5951	2.27503	0	1.96607	0.62914	2.19077	4.26918	0.08426	0.10953	0	0	2.98843	0	0.56173	2.13459	2.202	989	>500	9	3
OSTEO	0	0.94807	26.2544	10.599	9.04317	0	2.18786	0	7.29288	12.4465	0	0	0	0	4.62855	0	0	7.00117	5.17308	0.97238	0.55912	14.3265	7.22806	6.46636	0	0.72928	0	5.15364	10.1128	0.03241	0.00972	1.36134	0	4.17477	0.19447	0	4.3498	2.99494	1714	>500	4	3
OSTEO	1.59744	0.79872	8.78594	7.5213	5.79073	0	0.6656	0	5.99042	11.4483	0.43264	0	2.23642	0.79872	0.37273	0	0	0.37273	2.23642	0.53248	0.53248	5.6798	5.61324	4.92545	0	0	0	4.52609	8.25346	0.22186	0.01331	0.49698	0.26624	1.3667	0	0	0.78097	2.7334	1252	>500	9	3
IPB	2.57235	2.09003	16.9346	15.2197	3.53698	0	4.82315	0	7.07395	12.0043	0.02679	0.03215	0	0	8.403	0	0.16077	1.80064	4.80171	2.35798	2.17042	11.9328	8.28867	2.30439	0	1.87567	0	4.28725	4.85888	0.02679	0.03215	0	0	6.20222	0	0.10718	1.70061	5.00179	1555	>500	4	3
OSTEO	2.02293	0.92717	0	7.19263	0	0	0	0	0	0.44953	0.39334	0	0.62935	0	1.88806	0	0	0	5.97887	0.6743	0.22476	0	2.86581	0	0	0.1873	0	0	0	0.47763	0.00561	1.15382	0	1.67828	0	0	0.10489	3.67124	1483	>500	19	3
IPB	1.321	0	15.1915	14.8613	7.59577	0	0	0	12.8798	9.24703	0	0	0	0	1.84941	0	0.33025	2.77411	7.08939	0.22016	0	8.65991	9.17364	5.3941	0	0.36694	0	5.83443	4.40335	0.24768	0	0	0	1.23294	0	0	2.15764	4.829	1514	>500	19	3
IPB	0	0.29655	1.58165	11.2693	0	0	0	0	2.37248	4.74496	0	0.41518	0	0	2.21431	0	0	0	0	3.95413	0.88967	1.31804	5.63464	0	0	0	0	1.18624	1.05444	0.03295	0.23724	0.18452	0	2.02979	0	0	0	0	843	>500	16	3
IPB	0	0.82417	12.8205	4.94505	12.0879	0	0	0	8.79121	15.3846	0	0.05494	1.02564	0	8.20513	0	0	5.71429	0	0	0.27472	7.93651	4.21245	8.88278	0	0	0	3.663	7.02076	0.06105	0.05494	1.19658	0.18315	3.76068	0.7326	0	4.89621	0.34188	910	>500	9	3
IPB	1.29116	2.34022	7.96213	17.7534	6.45578	0.43038	1.88294	0	12.9116	11.6204	0.10759	0	0	0	11.147	0	0	9.9419	2.41016	0.64557	0.96836	6.52751	13.6289	5.8102	0.14346	0.98629	0	7.63934	6.59924	0.18829	0.01075	0.30126	0.10759	6.82878	0	0.10759	6.4773	1.90804	1549	>500	16	3
IPB	0	0.72115	1.28205	4.32692	1.92308	0	0	0	1.92308	0	0.16025	0	1.79487	0	1.79487	0	0	0	1.79487	0	0.96153	1.06838	1.06838	1.28205	0	0	0	0	0	0	0.1923	1.79487	0	1.19658	0	0	0	0	520	>500	9	3
IPB	3.25733	9.97557	16.0152	35.5592	10.1791	0	2.03583	0	2.85016	14.7937	0.06786	0.02035	0	0	1.52009	16.2866	0	7.57329	4.56026	3.25733	6.24321	8.86717	23.8871	6.17535	0	1.47032	0	3.6645	9.77199	0.09048	0	0	0	0.38002	12.3507	0	4.94933	3.4202	1228	>500	10	3
IPB	5.14469	1.76849	17.5777	12.5938	12.3794	0	0.5359	0	1.60772	6.85959	0.18756	0.22508	1.80064	0	18.3065	0	0.80385	2.03644	6.00214	1.7149	0.48231	4.43015	3.35834	4.01929	0	0	0	0.32154	2.14362	0.06252	0.03751	0.20007	0.05359	3.40121	0	0.10718	1.27188	2.60093	1555	>500	2	3
OSTEO	4.00534	1.00134	10.2359	8.67824	8.01068	0	1.11259	0	2.67023	5.34045	0	0	1.24611	0	7.47664	0	0	5.60748	0	2.67023	0.66755	6.37888	4.41329	4.6729	0	1.11259	1.45379	1.33511	9.34579	0.07417	0.05562	0	0	7.26895	0	0	3.11526	1.24611	749	>500	9	3
IPB	0	0	14.9626	16.4173	9.35162	0	0	0	4.98753	8.72818	0.67539	0	0.58187	0	5.81879	0	0	1.16376	4.07315	0	0.1039	7.34275	7.4813	5.81879	0	0	0	0.83125	7.34275	0.17317	0	0	0	5.04295	0	0	0.94208	1.9396	802	>500	19	3
IPB	1.94742	1.94742	15.5794	39.4353	14.8491	0	0.81142	0	7.78968	14.2811	0.44628	0.14605	0	0.48685	14.9951	2.43427	4.38169	5.12821	14.0863	8.76339	1.21714	10.9272	25.4246	7.95196	0	0.67618	0	4.05712	8.6552	0.62209	0.04868	0	0	14.0863	1.62285	3.84074	4.86855	6.96743	1027	>500	8	3
IPB	0	0.71564	12.2986	6.89143	5.40712	0	0	0	8.90585	15.2672	0.05301	0.0318	0	0	2.37489	0	1.27226	1.78117	0.59372	0	0.47709	7.2095	4.62963	3.81679	0	0	0	6.57337	9.18858	0.01767	0.0371	0.29686	0	1.38535	0	0.63613	0.36754	1.38535	1572	>500	16	3
IPB	0	0	19.3517	13.6671	16.328	0	0	0	18.8679	19.3517	0.24189	0	0	0	0.67731	0	0	8.22448	0	0	0	17.2553	7.33753	12.0948	0	0	0	14.03	10.966	0.08063	0	0	0.24189	0	0	0	5.70876	0	689	>500	10	3
IPB	12.0968	1.00806	15.457	13.1048	14.3649	0	0	0	12.0968	24.8656	0.042	0	0	0	8.93817	1.00806	0	3.36022	0	2.01613	0.33602	11.9848	7.70049	10.6687	0.22401	0.56003	0.94086	7.05645	10.7527	0.014	0.0504	0.31362	0	5.33154	0.33602	0	1.20968	1.5681	992	>500	16	3
OSTEO	0	0	8.26446	8.26446	6.19835	0	0	0	2.06612	0	0	0	0	0	0	0	0	0	1.92837	0	0	1.83655	3.44353	2.75482	0	0	0	0.6887	0	0	0	1.28558	0	0.64279	0	0	0	3.21396	242	<300	16	3
OSTEO	0	0	2.43977	6.32815	2.74474	0	0	0	0.91491	8.53919	0.95303	0	0.85391	0	5.12351	0	0	2.98872	5.55047	0	0.03812	3.558	5.08285	2.05855	0	0	0	1.21988	5.28616	0.48287	0	0.56927	0	4.83887	0.30497	0	1.56552	4.41191	1093	>500	9	3
OSTEO	11.2554	1.7316	3.7518	8.29726	4.7619	0	3.24675	0	0	6.92641	0.1443	0.12987	0	0.8658	20.6061	2.1645	0	0.66378	1.21212	9.52381	1.1544	1.3468	4.1847	3.0303	0	2.6455	0	0.2886	1.924	0.18037	0.12987	0	0.1443	13.468	1.443	0.50505	0	1.61616	1155	>500	8	3
OSTEO	1.7301	0.64878	8.36217	13.192	9.29931	0	1.44175	0	2.59516	9.80392	0.46856	0.04325	1.61476	0	14.331	0	0.5767	1.55709	3.22953	1.7301	0.36043	8.65052	8.53037	7.85755	0	0.84102	0.20184	1.87428	4.61361	0.24029	0.07208	0.53825	0	11.0342	0	0.76893	1.72049	1.88389	1156	>500	8	3
IPB	1.33156	0	4.88238	15.7568	5.82557	0	0.55481	0	0	8.21127	0.11096	0	0.93209	0	9.32091	0.66577	0	1.24279	2.48557	1.33156	0.11096	2.58914	9.20994	3.6063	0	0.83222	0	0	4.91937	0.04623	0.02219	0.41426	0	5.79967	0.22192	0.22192	0.82852	1.86418	1502	>500	2	3
IPB	0	0	12.0981	3.50207	8.83477	0	0	0	5.2531	7.64088	0	0	0	0	0.89143	0	0	0.57306	2.67431	0	0	7.85313	2.75921	7.4021	0	0	0	2.22859	5.30617	0.06632	0.00795	0	0.15918	1.18858	0	0.42449	0.23347	2.08002	1047	>500	10	3
OSTEO	7.70218	2.56739	11.3393	9.19983	9.94865	0	1.60462	0	7.06033	10.2696	0.05348	0.03209	0.59905	0	4.49294	0	0.16046	0.59905	1.19812	4.27899	1.49765	8.48666	7.45257	5.02781	0	0.17829	0.79874	4.06504	3.56583	0.05348	0	0.09984	0	3.99372	0	0.26743	0.19968	1.89702	1558	>500	16	3
OSTEO	0	0.34293	13.7174	23.2053	5.48697	0	0	0	6.17284	19.6616	0.22862	0.37722	1.92044	0	14.7234	0.68587	0	5.12117	5.12117	0	0.45724	7.77321	8.80201	5.14403	0	0	0	7.08733	12.8791	0.17146	0.12574	0	0	11.0959	0	0	4.26764	2.56059	729	>500	10	3
OSTEO	2.00401	1.50301	17.8134	11.356	10.02	0	2.50501	0.62346	13.6941	14.0281	0.2505	0	0	0	3.74081	0	0.22266	2.93921	1.24694	0	0.52883	9.35204	5.13991	7.96037	0	1.39167	0.31173	8.01603	8.75826	0.30616	0	0.20782	0.11133	1.7665	0	0.44533	1.58836	0.62346	1497	>500	10	3
OSTEO	0	1.57563	6.30252	8.22829	3.15126	0	12.2549	0	1.05042	1.40056	5.51471	0.10504	0.98039	0	19.6078	0	0.70028	3.60644	10.7843	0	1.31303	4.31839	4.66853	2.45098	0	5.2521	0	1.22549	0.23342	1.98413	0.05252	1.14379	0	12.4183	0	0.46685	4.27171	4.57516	952	>500	9	3
IPB	0	0.84688	2.25836	12.7033	5.75881	0	0	0	8.46883	9.25926	0.02822	0	0	0	3.1617	0	0.50813	4.90063	1.26468	0	0.45167	2.86058	7.97952	4.29088	0	0.18819	0	3.61337	3.65101	0.06586	0	0.31616	0.11291	2.52936	0	0.39521	2.21319	1.0539	1476	>500	19	3
OSTEO	0	0	0	3.97614	0	0	0	0	0	0	0	0	0	0	0	0	0	0	0	0	0	0	5.08063	0.16567	0	0	0	0	1.32538	0	0	0	0	1.23702	0	0	0	0.92776	503	>500	10	3
OSTEO	0	0.16523	0	11.8969	0	0.88125	0.27539	0	0.33046	0.88125	0.02753	0.03304	0	0	4.31813	0	0	0	4.62657	0	0.13769	0.14687	10.5199	0	0.5875	0.27539	0	0	0	0.03671	0.04957	0	0	2.4675	0	0	0.10281	3.70126	1513	>500	8	3
IPB	0	0	0	0	0	0	0	0	0	0	0	0	0	0	0	0	0	0	0	0	0	0	0	0	0	0	0	0	0	0	0	0	0	0	0	0	0	0	1180	>500	16	3
OSTEO	4.53858	0.75642	7.5643	20.4866	5.29501	0	0.31517	0	10.2118	10.59	1.95411	0	0	0.37821	4.94201	0	0.1891	3.90822	0.706	1.51286	0.78794	6.63977	12.0819	2.96268	0	0.42023	0	8.95108	8.40477	0.57782	0.06933	0	0.37821	4.05951	0	0.06303	3.21062	1.17667	1322	>500	10	3
IPB	0	1.51576	0.8084	19.4018	1.41471	0	0	0.37725	0	1.07788	0.13473	0	0.37725	0.2021	15.4675	0	0	0	0.75451	0	1.71787	0.62876	11.924	0.26946	0	1.01051	0.88026	0	0	0.08982	0	0.88026	0.26946	12.198	0	0	0	0.503	1237	>500	16	3
OSTEO	0	2.84662	15.4052	19.2007	17.4146	0	1.11632	1.25028	9.0422	23.2195	0.53025	0.06697	0	0	12.1902	0.33489	0	4.21969	1.87542	0	1.3954	9.00499	9.0422	13.954	0	1.11632	0.62513	4.68855	15.4796	0.29768	0.03348	0	0	8.54357	0.22326	0	2.91732	1.56285	1493	>500	10	3
IPB	1.28949	0.96711	2.36407	7.73694	3.5461	0	0.80593	0	2.90135	10.3159	0.08059	0.01611	0	0	4.8141	0	1.1283	1.80529	0	0	0.32237	1.50441	4.69231	2.63271	0	0.26864	0	1.50441	7.45039	0.13432	0	0.20058	0	2.4572	0	1.1283	0.95279	0	1551	>500	16	3
IPB	0	2.86746	3.96488	27.4002	6.79694	0	0	0	1.69924	5.66412	0.2832	0.40356	3.17191	0	15.463	0	1.55763	9.57236	5.15435	0	1.27443	2.83206	11.5878	1.69924	0	0.472	0	0.4248	4.53129	0.2006	0.22656	0.92513	0	11.1017	0.56641	2.12404	4.23865	3.56839	1177	>500	2	3
OSTEO	1.82149	3.4153	10.3218	11.6879	0.91074	0	1.13843	0.85003	3.18761	6.98239	0.11384	0.18214	2.55009	0	8.07529	1.82149	1.06254	2.55009	4.25015	2.42866	2.46661	5.97045	7.74135	1.89739	0	2.02388	0.28334	2.88403	7.89314	0.34153	0.12902	1.41672	0	6.5169	2.42866	0.50597	1.43696	3.54179	1098	>500	9	3
OSTEO	0	0.82946	5.75094	18.027	4.97678	0	1.38244	0	1.32714	6.19332	0.13824	0.03317	0.61933	0	3.09666	0	0	3.67175	1.23866	0	0.74651	3.76023	10.6724	3.64964	0	0.92162	0	0.66357	3.83396	0.08294	0	0.20644	0	2.99344	0	0	3.02293	0.61933	1507	>500	10	3
OSTEO	0	0	0	0	0	0	0	0	0	0	0	0	0	0	0	0	0	0	0	0.41305	0.36142	0.13768	4.54358	0.10326	0	0	0	0.20652	0	0.06884	0	0.57827	0	1.3493	0.41305	0.13768	0.37174	0.19275	1614	>500	16	3
OSTEO	0	0	0	4.58716	0	0	0	0	0	0	0	0	0	0	0	0	0	0	0	0	0	0	4.58716	0	0	0	0	0	0	0.03185	0	0	0	0	0	0	0	0	436	300-500	10	3
IPB	7.06487	0.40141	13.4875	25.5299	7.86769	0	0.2676	0	10.2762	16.6988	0.50845	0.01605	0	0	10.4903	0	0.42817	2.99722	5.39499	2.99722	0.16056	8.1353	14.2189	4.81696	0	0.2676	0	6.52965	9.13438	0.24976	0	0	0	7.49304	0	0.14272	2.19796	3.69657	1557	>500	2	3
IPB	0	0	15.5763	7.00935	14.0187	0	0	0	21.028	56.0748	0	0	0	0	19.6262	7.00935	1.55763	2.18069	0	0	0	8.30737	6.23053	7.78816	0	0.64901	0	7.78816	35.3063	0.3894	0	1.45379	0	15.9917	0.77881	2.07684	4.36137	1.45379	214	<300	9	3
OSTEO	0	1.05485	15.4712	4.39522	8.79044	0	0	0	4.21941	15.94	0.32231	0.03516	0	0	4.92264	0.70323	2.28551	4.40694	3.60994	1.40647	1.34787	13.2052	2.34412	6.32911	0	0.09767	0	3.39897	10.4704	0.50789	0.07032	0	0.23441	3.93812	1.40647	0.27348	2.81294	1.53149	1422	>500	9	3
OSTEO	1.32188	0.16523	4.84688	3.63516	2.31328	0	2.20313	0	3.63516	6.16876	0	0	0	0	6.16876	0	0.24785	1.80657	2.4675	1.7625	0.19277	3.67188	4.77344	1.43203	0	1.00977	0	2.64375	2.9375	0.00917	0.02203	0.51406	0	5.24345	0	0.05507	2.13703	1.74782	1513	>500	9	3
OSTEO	0	0	9.80392	10.4801	4.0568	0	0	0	8.11359	26.3692	0.12677	0	0	0	2.83976	0	1.0142	1.08181	0.94658	0	0.25354	7.55015	7.43746	3.0426	0	0	0	5.91616	13.9734	0.04225	0.0169	0	0	2.52423	0	0.33806	1.00293	1.57764	986	>500	9	3
IPB	7.32845	0.24983	10.4375	9.10504	4.83011	0	0.55518	0	6.32911	2.22074	1.13813	0.01665	0	0	10.8816	0	0	0.17765	0.3109	2.44282	0.22207	12.9543	5.12621	2.05419	0	0.18506	0.93271	4.44148	2.07269	0.49041	0.04441	0.10363	0	5.18173	0	0	0.3109	0.51817	1501	>500	2	3
OSTEO	2.10305	1.57729	0.3505	35.4013	0	0	0	0	0	2.10305	0	0	0	0.26288	0.98142	1.05152	9.46372	0.98142	0	1.40203	0.83245	1.05152	22.7246	0.3505	0	0	0	0.17525	1.86938	0.30669	0	0	0.17525	1.47213	1.05152	5.25762	0.65428	0	951	>500	19	3
OSTEO	2.0284	0.50709	4.0568	9.80392	3.0426	0	0	0	6.08519	10.8181	0	0	0	0	1.89317	0	2.0284	2.83976	3.78634	1.35227	0.50709	2.47915	2.87356	3.38066	0	0.56344	0	2.70453	6.31057	0.02817	0.0507	0	0	3.15529	0	1.07054	2.52423	1.57764	493	300-500	2	3
OSTEO	0	0	3.19489	3.19489	0	0	0	0	3.19489	4.25985	0	0	5.96379	0	11.9276	3.19489	0	3.40788	5.96379	0	0	0.70997	2.92865	1.59744	0	1.77494	0	2.12993	0	0.13312	0	0	0	9.44267	1.59744	0	2.8754	2.9819	313	300-500	9	3
IPB	1.74064	0.43516	6.67247	13.0548	5.22193	0	0	0	0.87032	2.32086	0.07252	0.17406	0	0	7.3107	0	0	3.45228	0	0.87032	0.21758	3.19118	7.22851	2.68349	0	0.12087	0	0.58021	3.28788	0.01208	0.02175	0	0	4.60304	0	0	1.89537	0	1149	>500	2	3
IPB	3.82897	1.91449	10.636	16.5922	8.93427	0	0.5318	0.59561	11.1678	19.5703	0.18613	0	0	0	8.33865	0	0.15954	7.36014	4.16933	1.27632	0.10636	3.82897	3.65171	1.91449	0	0	0	3.08445	4.67986	0.31908	0	0.19853	0	2.58101	0.21272	0.14181	3.07736	0.59561	1567	>500	19	3
OSTEO	0	0	3.43643	2.06186	2.57732	0	0	0	2.06186	1.37457	0	0	0	0	1.9244	0	2.74914	0	1.9244	0	0	2.29095	3.83734	2.23368	0	0	0	0	0	0	0	0	0	5.13173	0	0.45819	0.32073	4.49026	485	300-500	4	3
IPB	0	0	31.6206	9.88142	13.834	0	0	0	9.88142	2.63505	0	0	3.68906	0	7.37813	0	0	3.68906	0	0	0	21.9587	1.7567	6.917	0	0	0	5.27009	1.7567	0.10979	0	0	0	1.22969	0	0	3.68906	0	253	<300	9	3
IPB	0.98522	2.95567	11.4942	19.0476	12.8079	0	0.82101	0	3.94089	17.734	0	0.04926	0.91954	0	5.51724	0	0.2463	1.37931	7.81609	0	1.31363	9.85222	12.2332	9.93432	0	0	0	2.79146	13.5742	0.02736	0.03284	1.83908	0	5.6705	0	0.1642	0.72249	3.21839	1015	>500	9	3
OSTEO	10.4167	0	0	31.25	10.4167	0	0	0	0	0	0	0	0	0	0	26.0417	0	0	0	3.47222	0	0	20.2546	8.68056	0	0	0	0	2.31481	0	0	0	0	0	12.1528	0	1.62037	0	96	<300	16	3
IPB	0.64599	0.64599	10.5512	15.5577	1.77649	0	0.53832	0	6.78295	16.3652	0	0.04844	0	0	7.53661	1.29199	0.16149	1.05512	3.61757	0	0.05383	7.46483	12.5431	1.72265	0	0.71777	0	5.70629	12.0586	0	0.04844	0	0	5.22538	1.93798	0	1.14844	2.61269	1548	>500	16	3
IPB	0	1.00644	10.467	17.2437	5.23349	0	0.33548	0.75147	8.05153	7.78315	0	0	0	0	7.13902	1.20773	0.20128	4.80408	0.75147	0	0.60386	7.96207	9.43818	3.69028	0	0.22365	0	3.75738	6.88853	0.11182	0	0	0	4.88459	1.20773	0.60386	4.29415	1.00197	1242	>500	16	3
OSTEO	0	0.72815	8.09061	9.87055	2.42718	0	0	0	1.45631	1.2945	0	0.04854	0	0	8.15534	0	0	2.26537	2.71845	0	0.16181	6.36462	9.41208	1.13269	0	0	0	1.13269	3.8835	0.05393	0.01618	0	0.0809	5.13484	0	0	2.45955	2.11435	1030	>500	8	3
IPB	0	0.32765	23.5911	3.93185	19.6592	0	1.09218	2.44648	22.2805	52.4246	0.32765	0	0	0.6553	0	0	0	4.89297	3.66972	0.43687	0.0546	10.9218	2.47561	10.1573	0	0	0.81549	19.0039	47.4734	0.16382	0	0.20387	0.21843	2.44648	0	0.32765	3.46585	2.85423	763	>500	9	3
IPB	1.3624	0.85149	12.7157	15.327	12.6022	0	0	0	10.8992	9.19619	0.14191	0.06811	0.95367	0	0.63578	0	1.41916	4.81381	2.54314	0	0.73796	8.25008	10.5586	8.11762	0	0.56766	0	6.13079	6.28217	0.08514	0.00567	0	0	1.16561	0	0.41628	2.36149	2.01332	1468	>500	19	3
IPB	0	0	30.1205	1.50602	9.03614	0	0	0	18.0723	28.1124	5.02008	0	0	0	0	12.0482	0	0	0	0	0.502	17.403	2.67738	9.03614	0	3.34672	0	3.01205	10.7095	4.60174	0	0	0	7.49665	4.01606	0	0	0	166	<300	9	3
OSTEO	0	0.31867	1.91205	20.2889	0.63734	0	1.06225	0	0	5.52369	0.13278	0.03186	0	0	1.78458	0.63734	0.42489	0.89228	2.97429	0	0	0.99143	14.9954	0.42489	0	0.17704	0	0.53112	1.98286	0.15048	0.01062	0	0	1.388	1.6996	0	0.49571	1.98286	1569	>500	19	3
OSTEO	0	1.37931	11.4942	10	9.65517	0	0.57471	0	1.37931	13.7931	0.05747	0.03448	0	0	11.5862	1.72414	1.23563	0.04597	2.89655	0	0.51724	10.5747	6.2069	6.83908	0	0.38314	0.05363	6.2069	11.8008	0.10536	0	0	0	7.72414	0.45977	1.22605	0.32183	1.93103	1450	>500	9	3
IPB	0	0	0	7.98722	3.19489	0	1.3312	0	0	0	0	0	0	0	7.45474	0	0	4.47284	0	0	2.12993	0.35498	5.50231	1.59744	0	0.44373	0	1.06496	1.41995	0	0	0	0	2.9819	0	0	3.47888	0.99396	313	300-500	16	3
IPB	2.48756	3.88682	2.48756	0	2.79851	0	0	0	0.62189	6.6335	0	0.03109	0	0	3.48259	0	0	0	1.16086	0	2.12479	1.65837	0	3.2131	0	0	0	0.20729	4.69873	0	0	0	0	0.58043	0.62189	0	0.19347	0.7739	804	>500	16	3
OSTEO	0	2.002	13.6804	24.5245	14.5145	0	1.66834	0	8.50851	10.01	0	0	1.86854	0	8.87554	0	0.83416	4.87154	2.8028	0	1.71004	10.6773	18.0736	9.34268	0	2.36347	0.15571	8.17484	10.01	0	0	1.08998	0	9.80981	0	1.62663	4.12635	0	999	>500	16	3
IPB	0	0	9.06599	20.0822	2.53004	0	0	0	5.37634	3.37339	0	0.06325	0	0.94876	0	0	0	2.19271	0	0.84334	0.13177	6.46567	14.618	1.10689	0	0	0	5.27093	2.6706	0.04392	0.07379	0	0.5798	0	0	0	1.09635	0	1581	>500	10	3
OSTEO	0	1.04254	14.4565	13.414	12.0934	0	0	2.33528	9.17431	20.0167	0.45176	0.02085	1.94607	0	21.0175	0.41701	2.29358	5.44899	7.39505	0.278	0.55601	7.9696	7.20508	5.07367	0	0	0.51895	5.8382	12.7884	0.278	0	1.42712	0	14.7901	1.25104	2.00398	3.89213	4.28135	1199	>500	9	3
OSTEO	0	1.43678	15.645	11.4144	7.9023	0	0	0	4.31034	9.57854	0.15964	0.19157	0.44699	0	8.49298	0	0	2.26692	1.341	0.31928	1.31705	9.15283	6.3857	3.51213	0	0	0	1.59642	4.25713	0.18624	0.24744	1.192	0	4.76799	0	0.15964	0.46828	2.08599	1044	>500	8	3
IPB	0	0.90991	4.54959	28.5866	3.86715	0	0	0	0	7.27934	0.11373	0	0	0	6.79406	0	3.63967	1.27389	5.9448	0	0.3033	2.52755	17.6676	1.89566	0	0.37913	0	0	4.24628	0.05055	0.01516	0	0	6.51097	0.90991	1.81984	0.70771	2.12314	1099	>500	9	3
IPB	0	0	5.41049	4.58716	7.05716	0	0	0	4.94001	7.52764	0.11761	0	0	0	2.63467	1.05857	0	1.83486	0.65866	0	0	6.42986	5.88097	6.58669	0	0.39206	0	7.8805	14.1143	0.09801	0.00588	0	0	3.40312	2.11715	0.15682	3.85792	3.5129	1417	>500	16	3
OSTEO	0	2.60223	0.49566	18.0917	0.18587	0	0.61957	0	0	0	0.06195	0.14869	4.16357	0	8.32714	0	0.68153	5.32838	0	0	1.88971	0.16522	12.3916	0	0	0.30978	0	0	0	0.11358	0.09913	2.5444	0	6.70797	0.12391	0.66088	2.83354	0.69392	1345	>500	2	3
OSTEO	0	0	4.58716	2.29358	1.14679	0	3.82263	1.07034	4.58716	3.0581	0	0	0	0	7.49235	0	0	1.37615	0	0	0.09556	3.0581	4.07747	0.38226	0	0.6371	0.35677	0	0.50968	0	0.03822	0	0	3.92457	0	0	0.56065	0	436	300-500	2	3
IPB	0	0	0	0	0	0	2.35405	0	5.64972	0	0	0.14124	0	1.41243	10.5461	0	0	0	0	0	0	0	0	0	0	0	0	5.64972	5.02197	0.15693	0	0	0	10.5461	0	0	0.87884	2.63653	177	<300	19	3
IPB	2.589	1.21359	19.849	13.4844	11.6505	0	0	0	15.2104	25.4585	0.24271	0.06472	0.90614	0	12.082	1.61812	0.86299	2.28695	5.43689	1.07875	1.69903	13.1607	8.7918	6.36462	0	1.07875	0	11.5426	15.4621	0.26968	0	0.70478	0	6.54441	0.21574	0	1.84106	3.72528	1545	>500	9	3
IPB	0	2.94889	1.31062	4.8602	0.32765	0	0	0	0.6553	0.21843	0	0	4.58716	0	2.75229	1.96592	3.93185	9.78593	0	0	1.55636	0.6553	2.23897	0.10921	0	0.36405	0	0	0	0.12742	0.01092	2.03874	0.0546	1.01937	0.21843	7.42682	5.50459	0	1526	>500	9	3
OSTEO	0	0	0	9.73597	1.9802	0	0	0	1.9802	7.92079	0	0	0	0	2.77228	0	0	2.64026	0.92409	0	0	1.76018	5.28053	0.99009	0	0	0	1.32013	3.52035	0	0.066	1.23212	0	1.84818	0	0	2.28823	0	505	>500	16	3
IPB	2.30592	1.15296	9.7361	12.6185	4.99616	0	0.32026	0	2.30592	17.4225	0.41634	0.11529	0.71739	0	12.5544	0	1.02485	3.17704	5.38048	0	0.19215	4.86805	6.44803	3.20266	0	0.10675	0	3.20266	10.7609	0.26688	0.02562	0.47826	0	6.93484	0	0.59783	2.10095	3.82612	1301	>500	4	3
OSTEO	0	0.49051	13.2985	7.90277	8.8293	0	1.63506	0	16.3506	9.15631	0.0545	0	0.61042	0	20.1439	0.65402	0.81752	5.9734	1.83126	0	0	8.79297	3.50629	4.30565	0.58135	0.63585	0	11.1184	4.21481	0.08175	0	0.50868	0	9.15631	0.43601	0.30884	1.34438	0.71215	1529	>500	16	3
OSTEO	0	0	2.36407	0	0	0	0	0	0	0	0	0.70921	0	0	33.0969	0	0	0	0	0	0	12.6083	1.57604	3.5461	0	1.97006	0	1.18203	1.57604	0	0	2.20646	0	24.2711	0	0	3.4673	0	141	<300	8	3
OSTEO	0	5.69044	19.221	44.1325	21.6237	0	1.26454	0	22.7618	28.3257	0	0	0	0	19.828	2.27618	2.08649	1.71978	4.24886	0	5.56399	15.6803	26.4289	16.692	0	1.4753	0	9.86343	18.8838	0.06322	0.1138	0.47209	0	14.871	3.54072	0	1.58489	2.36048	659	>500	16	3
IPB	8.84956	1.10619	2.94985	8.84956	3.31858	0	1.84366	0	4.42478	11.7994	0.55309	0	6.19469	0	0	0	4.42478	0	2.0649	0	1.29056	1.47493	4.91642	2.21239	0.98328	1.53638	0	2.94985	7.86627	0	0.03687	0	0	0	0	1.47493	0.29498	0	452	300-500	9	3
IPB	0	0.31565	0	1.47306	0	0	0	0	0	0	0	0	0	0	0	0	0	0	0	0	0.63131	0.56116	3.08642	0.84175	0	0.35072	0	0.42087	0.56116	0.03507	0.02104	0	0	0.39281	0	0	0	0	792	>500	10	3
OSTEO	4.52489	0.75414	0.75414	6.03318	0.75414	0	0.62845	0	0.37707	0	0.50276	0.0377	0	0	2.11161	0	0	0.70387	0.70387	1.25691	0.62845	0.92173	3.20513	0.25138	0	0.10474	0	0.62845	2.01106	0.12569	0	0.46924	0.18853	1.05581	0.62845	0	2.22893	1.40774	1326	>500	2	3
IPB	0	0	10.3359	4.30663	6.45995	0	0	0	0	0	0.53832	0	4.82343	1.29199	9.64686	0	0	3.44531	0	0	1.29199	9.18748	3.80419	6.67528	0	1.43554	0	1.72265	0	0.10766	0	0	0.86132	4.82343	0	0	1.92363	0	387	300-500	9	3
IPB	1.94553	1.21595	24.211	3.67488	7.7821	0	0	0	2.59403	22.914	0.10808	0	0	0	0.60527	1.29702	0	4.02075	2.72374	1.51319	0.59446	12.2496	2.95432	5.29615	0	0.45035	0	1.94553	11.2408	0.09007	0	0	0	1.9167	0.54042	0	3.74694	1.71494	1542	>500	4	3
OSTEO	0	1	0	0	0	0	0	0	4	10.6667	0	0	3.73333	0	0	0	0	0	7.46667	0	0	0	0	0	0	0	0	4	5.33333	0	0	0	0	0	0	0	0	4.35556	250	<300	9	3
IPB	5.67261	1.01297	16.2075	16.0724	9.31929	0	1.01297	0	7.29335	23.2307	0.13506	0	1.5127	0	9.07618	0	0	2.26904	0	1.62075	0.54024	8.28381	7.65352	4.32199	0	0	0	6.21286	16.5676	0.37142	0	0.75634	0.27012	7.43742	0	0	1.13452	0	1234	>500	9	3
IPB	4.03226	0.50403	6.72043	13.4409	7.05645	0	0	0	7.05645	24.1935	0.16801	0	4.7043	0	1.88172	0	0.50403	21.9086	3.76344	0	0.50403	4.48029	9.18459	5.71237	0	0	0	4.36828	16.129	0.33602	0	1.25448	0	2.19534	0	0.16801	11.4247	3.76344	496	300-500	9	3
IPB	1.36612	0.34153	3.64299	2.6184	0	0	1.13843	0	6.14754	4.55373	0	0	0	0	2.55009	0	0.51229	1.82149	3.82514	0	0.56921	2.88403	4.2122	0	0	0.37947	0	6.37523	3.3394	0	0	0	0	3.18761	0	0.11384	2.21615	4.67517	732	>500	16	3
OSTEO	0	4.53795	23.469	31.9032	12.9263	0	0	0	11.5512	7.51742	0.18335	0.11001	1.54015	0	14.8882	0	0.27502	7.62743	4.10708	0	2.2919	12.7124	18.3963	7.51742	0	0.91675	0	8.43418	6.96736	0.06111	0.07334	2.05354	0	7.35851	0	0.24446	4.66936	3.76482	909	>500	16	3
OSTEO	0	0	0	8.23045	1.54321	0	0	0	0	0	0.1286	0	0	0	10.0823	0	0	0	0	0	0	1.02881	3.68656	0.5144	0	0.85733	0	1.02881	0	0.2572	0	0	0	4.8011	0	0	0.72016	0	324	300-500	2	3
OSTEO	4.02253	0.60337	5.36337	13.3414	3.8214	0	0	0	4.02253	6.97238	0	0	0	0	5.63154	1.20676	0	7.29418	6.75784	0	0	0.89389	1.38554	0.60337	0	0	0	1.07267	2.5476	0.01117	0	0.25029	0	0.75087	0	0	0.25029	0.75087	1243	>500	19	3
IPB	1.89994	2.69158	9.07748	40.7959	14.7245	0.2111	2.11104	0.59109	2.84991	24.0659	0.05277	0	0.29554	0.63331	6.79755	0	1.63606	6.31201	4.43319	0	1.34579	6.05165	22.4122	6.96643	0	0.79164	0.39406	2.53325	13.3699	0.03518	0.01583	0.59109	0.2111	6.69904	0	0.44859	3.72951	3.34952	1579	>500	4	3
IPB	0	0.46948	3.75587	10.7199	7.51174	0	0	0	4.69484	18.7793	0.07824	0	1.75274	0.46948	0.87636	0	0	1.12676	0.87636	0	0.07824	5.6338	9.20709	4.38185	0	0.13041	0	3.44288	12.1022	0.33907	0.01564	1.02243	0.31298	0.87636	0	0	1.25196	0	1065	>500	9	3
IPB	1.24688	0.7793	17.4564	10.8063	10.5985	0	5.71488	0	2.49377	24.1064	0.57148	0	0	0	11.6376	0	0	15.4613	0	0	0.41562	5.5417	4.60654	2.90939	0	0.17317	0	2.49377	13.8543	0.12122	0.01039	0	0	3.68523	0	0	5.44472	0	802	>500	19	3
IPB	0	5.54017	5.54017	5.30933	1.38504	0	1.1542	0	11.0803	11.0803	0	0	0	0	0	0	0	0	0	1.84672	2.07756	3.69344	9.5414	0	0	0	0	10.157	8.77193	0	0	0	0	0	0	0	0	0	361	300-500	16	3
OSTEO	0	0.89928	0.2398	45.9233	0	0	3.59712	0	0	0.47961	0.05995	0	0	0	0	0	0	0	1.34293	0.47961	0.71942	0	23.6611	0.1199	0	1.89848	0	0	0.15987	0.1199	0	0.22382	0	0	0	0	0	1.56675	1390	>500	19	3
IPB	3.52734	0.88183	0	1.76367	0	0	0	0	1.76367	0	0	0.13227	0.82304	0.44091	1.64609	0	0.58788	0.23515	7.40741	1.17578	0	0.39192	1.17578	0	0	0.24495	0	0.58788	0	0.17146	0.14697	0	0	3.56653	0	0.19596	0	4.38957	567	>500	9	3
OSTEO	0	2.56333	1.60836	26.8396	4.22195	0	1.00523	2.25171	1.20627	14.4753	1.10575	0	0	1.20627	6.75513	0	0	0.56292	5.62927	0	1.20627	2.27851	17.491	3.21673	0	1.17277	0	1.20627	7.77376	0.20104	0	1.12585	1.00523	3.00228	0	0.26806	0.16083	2.62699	829	>500	9	3
IPB	2.42718	2.73058	23.0583	16.4846	10.6189	0	0	0	11.5291	13.1472	0.25283	0.09101	0.56634	0	7.9288	0	0	2.83172	1.13269	0	1.51699	17.7994	9.70874	8.89968	0	0.16855	0	4.24757	9.97843	0.35396	0	0.9439	0	10.9493	0	0	2.31931	1.13269	824	>500	8	3
OSTEO	1.36054	0.85034	9.07029	12.6984	6.46259	0	1.13379	0	8.16327	10.8843	0.22675	0.13605	0	0	5.07937	0	0	3.80952	2.53968	0	0	5.89569	14.6636	6.46259	0	0.75585	0	3.1746	2.41875	0.17006	0.0907	0	0	3.1746	0	0.30234	2.75132	2.53968	735	>500	2	3
OSTEO	0	2.62055	13.0445	10.191	11.5304	0	1.74703	0	18.8679	12.5786	0.11646	0	0	0	6.84836	0.69881	0	2.74866	0.97833	0	2.2129	10.3269	8.11398	8.26928	0	1.16469	0	11.8798	9.89984	0.08735	0.01164	0.43481	0	5.54391	0.46587	0	1.68491	0.43481	1431	>500	10	3
OSTEO	0	0	11.571	12.6836	1.66889	0	0	1.24611	2.67023	12.4611	0	0	1.24611	0	2.49221	0	0	0	0	0	0	8.01068	7.93651	0.89007	0	2.03976	1.24611	2.44771	7.04643	0	0	0.62305	0	2.07684	0.44503	0	0	0	749	>500	4	3
IPB	1.78253	1.00267	0	3.86215	2.00535	0	0.74272	0	0.89126	0.59417	0.14854	0	0.83184	0	1.6637	2.6738	0	0.41592	2.49554	0	1.00267	0.29708	2.52525	1.63399	0	0.24757	0.27728	2.22816	0	0.07427	0.01485	0.27728	0	1.94098	0.59417	0	0.20796	1.10913	1122	>500	10	3
OSTEO	1.89753	1.10689	5.06009	13.1246	11.5433	0	0	0	1.89753	22.3487	0.0527	0.03162	0.59034	0	4.72275	0	1.58128	2.44571	4.13241	1.6867	0.13177	2.24893	8.67946	6.21969	0	0	0	2.74088	13.0719	0.10541	0.03162	0.59034	0	2.75494	0	0.52709	1.75698	4.03402	1581	>500	19	3
OSTEO	0	0.625	10.4762	7.20238	13.9286	0	0.29761	0	3.21429	0	0.02976	0.03571	0	0	3.66667	0	0	4.69048	1.33333	0.47619	0.1488	6.03175	4.84127	8.57143	0	0.0992	0	1.78571	0.95238	0.10912	0.04761	0.44444	0	3.11111	0	0	2.46825	1.66667	1400	>500	8	3
IPB	0	0	1.13572	13.9835	0	0	1.06474	0	0	0	0.14196	0.08517	0	0	6.36002	0	0	0	4.77002	1.41965	0.14196	1.51429	8.94378	1.56161	0	0.1183	0	0	0	0.36674	0	0	0	2.38501	0	0	0.31232	2.78251	1174	>500	9	3
IPB	0	0.91107	29.1545	25.9961	12.3907	0	0	0	1.45773	9.23226	0	0	0	0	13.6054	0	0	4.7619	10.2041	0	0.36443	18.9504	14.1318	8.86783	0	0.40492	0	1.45773	11.1759	0.32393	0	0	0	3.1746	0	0	2.72109	2.26757	686	>500	9	3
OSTEO	0	0.49701	29.8211	6.79258	13.9165	0	0	0	7.95229	10.603	0	0	1.85553	0	11.1332	0	0	0.92776	1.85553	0	0.33134	19.218	3.6448	9.27767	0	0	0	9.27767	12.3702	0.16567	0	2.7833	0	4.94809	0	0	2.51822	0.92776	503	>500	9	3
OSTEO	1.90476	0.63492	9.94709	15.3439	11.1111	0	0.26455	1.18519	7.93651	16.9312	0.5291	0	0.88888	0	7.40741	0.63492	0	6.43386	2.37037	1.26984	0.44973	6.77249	10.5291	6.66667	0	0.97001	0.59259	5.39683	10.2998	0.71428	0.03174	1.08642	0.42328	4.54321	0.21164	0.40564	4.13404	0.39506	1575	>500	9	3
OSTEO	1.94175	1.53722	0.86299	5.77131	0.32362	0	1.07875	0	0	1.726	0.10787	0.03236	0.60409	0	4.53074	0	0	0.60409	7.24919	0.43149	0.37756	0.64724	3.7936	1.2945	0	0.35958	0	0.21574	2.589	0.06292	0.06472	0.80546	0	5.73894	0	0	0.74793	3.6246	1545	>500	8	3
IPB	0	1.82482	3.47584	5.03997	1.04275	0	2.60688	0	7.29927	6.95169	0	0	0	0	3.40633	0	0	0.76468	0	0	1.30344	2.31723	6.31445	0.34758	0	2.1724	0	5.38756	5.0979	0.02896	0	0	0	2.7575	0	0.69516	1.2513	0.32441	959	>500	16	3
OSTEO	0	0.90909	1.21212	3.78788	0.90909	0	0	0	5	10.303	0.22727	0.04545	0	0	4.24242	0	0.22727	1.27273	0	0.30303	0.45454	1.21212	2.37374	1.36364	0	0	0	2.12121	5.25253	0.02525	0.01515	0	0	1.83838	0	0	0.56565	0	1100	>500	16	3
IPB	0	0	14.6379	12.5835	5.97072	0	3.53107	0	6.16333	12.3267	0	0	0.71905	0	1.43811	0	0	1.77196	0	2.05444	0.0963	12.1555	13.8033	5.07191	0	1.81904	0	2.69646	7.19055	0.0214	0	0.95873	0	1.19842	0	0	0.54785	1.07858	1298	>500	8	3
IPB	2.68097	0	1.78731	33.1769	6.70241	0	0	0	1.34048	11.1707	0.22341	0	5.00447	0	1.25112	0	0.89365	6.88114	2.50223	6.70241	0	1.48943	20.8892	4.46828	0	0.18617	0	1.78731	5.36193	0.07447	0	3.33631	0.22341	1.66816	0	0.29788	5.13852	0.83407	746	>500	2	3
IPB	7.39372	4.04344	0	10.3204	0	0	0.77017	0	0	0	0.26956	0	0	0	6.9008	0	0.23105	0	0.8626	2.1565	1.92545	0	7.08564	0	0	0	0	0	0.20538	0.12836	0.06161	0.28753	0	4.313	0	0.15403	0	1.2939	1082	>500	9	3
OSTEO	0	3.18134	11.6649	28.632	14.5811	0	0	0	16.4369	27.5716	0.08837	0.13255	0.49487	0	4.45387	0	0	5.33758	4.45387	0	1.14882	8.13008	18.8229	9.72075	0	0.58913	0	12.1951	17.4384	0.22092	0.15022	0	0	1.48462	0.53022	0	4.53635	4.12395	943	>500	10	3
IPB	0	0	0	7.76583	1.79211	0	0	0	0	19.1159	0	0	0	0	0	0	0	0	1.67264	0	0	0.79649	3.08642	0.29868	0	0.4978	0	0	7.96495	0.59737	0	0	0	0	0	0	0	0	279	<300	19	3
IPB	0	0.20341	2.98346	13.2221	2.44101	0	1.69515	0.37971	7.32303	12.4763	0.0678	0.04068	0	0	2.27828	0.81366	1.1527	2.49525	2.65799	0	0	5.24365	7.27782	1.89856	0	0.113	0.75942	9.76404	4.88202	0.113	0.08136	1.64542	0.13561	2.1517	1.35612	0.13561	1.79007	1.51885	1229	>500	16	3
OSTEO	2.01816	1.26135	5.71813	7.90447	1.51362	0	2.94316	0	4.03633	17.4907	0.08409	0.02522	0	0	8.00538	0	0.67272	1.41271	4.70905	1.34544	1.42953	3.81209	6.08252	0.75681	0	0.5606	0	1.6818	12.7817	0.16818	0	0	0	7.22054	0.33636	0.30833	1.41271	3.76724	991	>500	9	3
OSTEO	0	0	0	0	0	0	0	0	0	0	0	0	0	0	0	0	0	0	0	0	0	37.037	0	0	0	0	0	18.5185	0	0	0	0	0	0	0	0	0	0	9	<300	16	3
IPB	0	0.64718	21.2032	13.8683	7.02663	0	0.30818	0	3.3284	14.7929	0	0.2034	1.0355	0	6.21302	0.73964	0	2.41617	2.41617	1.72584	0.70882	15.0395	9.24556	4.68442	0	0.41091	0	3.45168	9.04011	0.08218	0.17874	0.46022	0	6.55819	0.49309	0	1.71762	2.07101	1352	>500	8	3
IPB	0	1.59236	3.53857	2.12314	7.431	0	5.30786	0	4.24628	11.3234	0	0	0	0	0.99079	0	0	7.21868	0	7.78485	1.2385	2.12314	1.41543	4.77707	0	3.83345	0	1.76929	5.66171	0	0	0.99079	0	0.33026	0	0	3.34985	0	471	300-500	4	3
OSTEO	3.87597	1.29199	6.89061	3.66064	0	0	0	0	0	6.89061	0	0.06459	1.20586	0	14.4703	0	0	1.20586	7.23514	5.16796	1.18432	6.17284	0.86132	0.21533	0	0	0	0.43066	7.46483	0.25122	0.08613	0	0	8.441	0	0	3.01464	4.82343	774	>500	9	3
OSTEO	0.63411	1.03044	4.43881	11.6255	3.48763	0	1.05686	0	4.12175	1.79666	0.05284	0.06341	3.55105	0.15852	13.3164	0.63411	1.90235	2.74783	5.32657	1.26823	0.55485	2.466	6.21785	2.80068	0	0.96878	0	2.43078	0.70457	0.04403	0.08454	2.07144	0	7.54597	0.63411	0.84548	1.87416	3.84697	1577	>500	2	3
OSTEO	2.09937	1.92442	0.93305	28.4581	0.17494	0	0	0	0.34989	1.63284	0.23326	0.05248	0	0	13.0627	0	0	0.55983	0	0.93305	1.108	1.32183	15.8813	0.40821	0	0.09719	0	0.11663	0.85529	0.21382	0.02332	0	0	7.51108	0	0	0.23326	0.21771	1429	>500	10	3
OSTEO	1.45349	1.99855	4.36047	32.2796	6.90407	0	0.60562	0	7.26744	9.20543	0	0	0	0	5.08721	1.09012	1.45349	3.29457	2.03488	0.96899	1.99855	5.8947	27.3538	7.8125	0	3.83559	0	5.57171	10.0129	0.03028	0	0	0	4.29587	1.93798	0.48449	2.13178	0.67829	1376	>500	16	3
IPB	2.8551	1.07066	11.1825	26.6476	3.21199	0	2.97407	0	3.21199	9.51701	0.05948	0	1.33238	0	2.66476	0	0	5.99572	2.33167	1.18963	0.71377	8.486	17.3685	2.73614	0	2.47839	0	2.8551	6.02744	0.23792	0	1.55445	0	2.4427	0	0.0793	3.21992	2.4427	1401	>500	2	3
OSTEO	1.27551	0.39859	10.6293	15.3061	4.9426	0	1.32866	0.89285	7.01531	17.2194	0	0.06377	0.59523	0	18.75	0	0	4.03912	2.38095	0.42517	0.53146	4.2517	10.5584	4.14541	0	0.17715	0.19841	3.40136	7.08617	0.38973	0.04251	0	0.10629	13.7401	0	0.21258	2.48016	1.88492	1568	>500	9	3
IPB	2.574	3.37838	14.8005	20.9674	9.33076	0	2.68125	2.4024	3.53925	19.305	1.79644	0.11261	3.3033	0	12.3123	2.25225	0.858	2.4024	31.5315	0.6435	1.287	10.725	15.3189	5.14801	0	0.53625	1.001	3.96825	9.15201	0.16981	0.10188	2.002	0	7.80781	2.25225	0.286	2.1021	16.016	1554	>500	4	3
IPB	0	0	0	0	0	0	0	0	0	0	0	0	0	0	0	0	0	0	0	0	0	0	7.40741	0	0	0	0	0	0	0	0	0	0	0	0	0	0	0	15	<300	16	3
IPB	0	1.26263	1.3468	4.88215	0.50505	0	0	0	3.0303	6.73401	0	0	0	0	2.82828	0	0	4.7138	0	0.3367	0.58922	3.367	5.16274	1.3468	0	0.14029	0	3.0303	4.93827	0.02805	0	0	0	0.94276	0	0	1.57127	0.94276	990	>500	16	3
OSTEO	0	0.72627	2.58231	20.8199	9.52227	0	1.34495	0	4.19626	3.87347	0.32278	0.09683	1.80762	0	8.58618	0	0	4.94943	5.42285	0.43038	0.43038	2.0802	11.2617	5.48741	0	0.53798	0	2.36712	3.29962	0.04483	0.15063	0.40169	0.10759	6.72836	0	0.08069	3.28527	3.21354	1549	>500	8	3
OSTEO	0	0.32216	3.43643	4.18814	0.64432	0	0	0	0.64432	0	0	0	0	0	0	0	0	0	0	0.8591	0.10738	1.14548	3.86598	0	0	0.8949	0	0	1.14548	0	0	0	0	0.20045	0.21477	0	0.02863	0.40091	776	>500	16	3
IPB	0.65487	0.32743	5.23903	3.16525	5.89391	0	2.4558	0	0.65487	0.87317	0.24557	0.06548	0	0	6.72342	0	2.29208	1.92098	4.88976	0	0.16371	2.61952	2.69228	4.85702	0	2.4558	0	2.51037	0.58211	0.03638	0.13097	0	0	7.33464	0	2.0374	1.81911	3.0561	1527	>500	2	3
IPB	0	1.32743	2.35988	21.0914	2.65487	0	1.47493	0	1.76991	7.07965	0	0	0	0	1.65192	0	1.32743	0	0	0	0.14749	1.57325	12.3894	1.76991	0	1.22911	0	1.76991	4.71976	0.63913	0	0	0	0.55063	0.58997	0	0	0	565	>500	16	3
IPB	1.56372	2.54105	5.73365	39.1582	1.95465	0	0.97732	0.72973	0	0	0.03257	0	0.36486	0	7.29737	1.17279	0.78186	0	1.09461	2.34558	1.3031	2.34558	26.4312	0.91217	0.52124	1.84606	0.85135	0	0	0.05429	0.03909	0	0	5.10816	0.52124	1.04248	0	0.85135	1279	>500	16	3
IPB	0	1.1041	4.62671	2.62881	1.89274	0	0.52576	0	4.10095	11.3565	0	0	0	0	2.64984	1.26183	0	1.17771	0.58885	0	0.57833	3.64529	2.61129	1.9979	0	1.05152	0	4.31125	7.43077	0.01752	0	0.09814	0	0.88328	0.84121	0.02628	1.78058	1.96285	1585	>500	16	3
IPB	0	0.66357	3.53904	17.7505	3.31785	0	0	0	5.97213	7.07808	0.11059	0	0	0	10.9931	0	0.82946	3.53904	2.16766	0.22119	0.47002	3.61277	12.4788	1.54833	0	0	0	2.87547	5.01364	0.04608	0.06635	0.30966	0	8.05132	0.11059	0.58062	2.44784	1.34189	1507	>500	8	3
IPB	1.26984	0.31746	9.52381	11.9048	12.381	0	1.5873	0	5.71429	11.4286	0.60846	0	1.48148	0	5.33333	0	0.15873	3.08995	7.40741	0.42328	0.63492	3.88007	5.7672	4.02116	0	0.26455	0	2.01058	4.3739	0.15873	0.01587	0.29629	0	3.55556	0.42328	0.14109	1.04409	1.77778	1575	>500	19	3
OSTEO	2.05903	2.23061	0.91512	7.37817	2.74537	0	1.1439	0	1.37268	6.86342	0	0.24021	0	0	13.4523	0	0.34317	0.96087	1.28117	0.22878	1.54427	2.82163	3.79394	2.05903	0	0.47662	0	0.68634	4.88065	0.11439	0.14298	0.32029	0	8.00732	0	0.36223	1.06764	0.74734	1457	>500	8	3
OSTEO	0	3.30396	14.6843	15.4185	0	0	0	4.1116	13.2159	0	0	0	0	0	16.4464	0	0	2.0558	0	5.87372	1.83554	12.2369	6.48556	0	0	0.61184	2.0558	7.34214	0	0	0	0	0	15.0759	0	0	7.88057	0	227	<300	8	3
OSTEO	0	0.80645	9.03226	12.3656	11.6129	0	0.53763	0	7.74194	15.4839	0.34946	0.12903	0.60215	0	4.51613	0	0.40322	2.23656	8.43011	0.86021	0.34946	7.31183	7.29391	5.26882	0	0.26881	0	5.5914	8.60215	0.66308	0.01075	1.00358	0	4.41577	0	0.05376	3.39785	3.6129	1550	>500	9	3
OSTEO	0	2.49004	11.5095	10.4028	9.96016	0	1.10668	0	11.2882	18.5923	0	0	0	0	9.91589	0	2.1027	1.85923	1.23949	0	0.88534	5.90232	4.05784	7.52545	0	0.92223	0	5.75476	12.69	0.07377	0	0.20658	0	6.81718	0	1.95514	1.85923	0.41316	753	>500	9	3
OSTEO	2.71003	1.18564	2.03252	11.7999	2.37127	0	0	0	1.35501	3.61337	0	0	0	0	5.69106	0	0	1.98735	0.9485	3.38753	0.87511	0.6775	7.05736	1.86314	0	0	0	1.46793	4.06504	0.15055	0	0	0	3.37248	0	0	1.40018	1.58085	1476	>500	19	3
IPB	2.13068	0.799	20.3599	3.66951	6.03693	0	0.29592	0	6.39205	8.99621	0.32552	0.10653	0.99431	0	3.64583	1.77557	0.41429	2.91193	0.99431	0.71022	0.35511	9.07513	1.91367	1.83475	0	1.18371	0	4.73485	6.62879	0.12823	0.05326	2.65152	0	1.87816	0.47348	0.15782	1.60196	0.99431	1408	>500	2	3
OSTEO	2.21076	0.36845	9.8256	5.89536	4.05306	0	0.92114	0	10.3169	11.7907	0.24563	0	0.34389	1.10538	1.37558	6.63228	1.65807	1.5721	2.06338	0	0	8.51552	3.15238	2.21076	0	0	0	6.7551	5.56784	0.04093	0.00614	0	0.49127	0.68779	3.6846	0.19446	2.30901	1.26095	1357	>500	16	3
OSTEO	0	0.17006	5.44218	11.1111	9.35374	0	1.41723	0	6.12245	7.02948	0.17006	0.03401	0.63492	0	3.49206	1.36054	0.90702	1.678	1.26984	0.68027	0.79365	2.6455	7.74754	6.74603	0	0.85034	0	3.51474	3.85488	0.16061	0.01133	0.63492	0	3.1746	0.45351	0.68027	2.21466	0.84656	1470	>500	10	3
OSTEO	12.0712	5.00318	25.8365	16.3596	5.55909	0	3.44134	0	8.89454	20.3304	0.07941	0.06353	1.18594	0	7.7086	3.49428	0	3.11309	6.81914	5.50614	3.89136	18.9185	12.177	3.22956	0	1.50007	0	7.72978	11.6123	0.16765	0.03176	0.59296	0	5.33672	3.60017	0	2.25187	7.7086	1574	>500	9	3
IPB	0	2.00401	16.7001	8.76754	1.50301	0	0.4175	0	12.0241	19.0381	0.334	0	0	0	0.9352	0	1.002	2.60521	6.54643	0	0.835	10.9107	4.78735	2.58851	0	0	0	7.84903	15.6981	0.02783	0	0	0	1.55867	0	1.002	2.73881	3.74081	998	>500	19	3
OSTEO	0	0	26.3736	15.0183	4.3956	0	0	0	15.3846	0	0.09157	0.05494	3.07692	0	4.10256	0	0	0	0	0	0.18315	16.1172	10.2564	1.64835	0	0	0	8.05861	3.9072	0	0.01831	1.36752	0	4.44444	0	0	0	0	455	300-500	10	3
OSTEO	2.08768	0.78288	1.04384	77.7662	0	0	0	0	0	0	0.08698	0.05219	1.9485	0	15.588	0	0	2.92276	0	2.78358	1.26131	0.57991	48.5966	0.08698	0	0.28995	0	0	0.92785	0.02899	0.05219	1.46138	0	7.30689	0	0.17397	1.87891	0.32475	958	>500	2	3
OSTEO	0	2.48756	15.7546	24.9793	9.95025	0	2.07297	0	11.194	4.14594	0	0.06218	1.74129	0	13.9304	0	0	6.96517	3.48259	1.65837	1.08831	16.1691	20.0732	8.29187	0	2.07297	0	8.29187	1.38198	0.01727	0	0.38695	0	3.28911	0	0	5.95633	3.28911	804	>500	16	3
OSTEO	0.77881	0.58411	4.41329	14.9273	7.00935	0	0	0	3.89408	9.34579	0	0.09735	0	0	4.36137	1.55763	0.51921	6.17861	1.09034	0.77881	0.71391	3.46141	8.39391	4.41329	0	0.21633	0	1.16822	5.71132	0.02163	0.07788	0	0.2596	1.93839	0.77881	0	4.35272	1.33264	1284	>500	16	3
OSTEO	2.98063	0	11.9225	21.8579	5.2161	0	1.86289	2.78192	2.23547	10.929	0	0	0	0	15.3005	0	0	0	1.39096	0	0	11.2601	14.4064	3.22901	0	1.86289	0.9273	1.49031	10.929	0.12419	0	2.08644	0	9.04123	0	0	0.46365	1.39096	671	>500	16	3
OSTEO	0	0.24752	12.2112	9.90099	3.71287	0	0	0	5.44554	5.28053	0	0.07425	0	0	8.31683	0	0	5.67657	3.23432	0	0.41254	9.46095	6.21562	4.20792	0	0	0	2.80528	6.16062	0.055	0	0.15401	0	6.16062	0	0.77007	3.9714	2.46425	1010	>500	4	3
IPB	0	0	13.1004	14.556	14.1921	0	0	0	6.55022	23.2897	0	0.21834	2.03785	0	6.11354	1.0917	0	0.87336	0	0	0.54585	12.8578	6.79282	8.55167	0	0.6065	0	5.82242	16.4968	0.1213	0.07278	0.67928	0	4.75497	0.7278	0	0	1.35856	458	300-500	9	3
IPB	0	2.19298	6.91122	3.18979	2.39234	0	0	0	0	6.91122	0	0	0	2.39234	0	3.18979	4.25306	4.83785	0	0	1.32908	4.9619	4.16445	1.19617	0	1.77211	0	0	4.60748	0	0	0	0	0	0	1.55059	3.18979	2.72904	627	>500	9	3
IPB	1.52323	0.476	0.50774	9.58365	1.52323	0	0.63467	0	0	1.01549	0.2856	0.07616	0	0	4.79817	0	0.76161	0.71084	1.06626	0	0.44427	0.08462	7.67961	0.88855	0.33849	0.21155	0	0.76161	0.67699	0.01057	0.01269	0	0	1.65863	0	0.69814	0.88855	0.94778	1313	>500	9	3
OSTEO	0	0.48138	4.92084	8.02311	4.49294	0	0	0	1.2837	4.70689	0.02674	0.09627	0	0	2.99529	0	0	1.2837	0	0	0.26743	5.2061	2.817	4.06504	0	0	0	0.85579	2.99529	0.14263	0.05883	0	0	1.3978	0	0	1.08401	0.79874	1558	>500	9	3
IPB	1.90355	2.61739	9.30626	9.04188	9.51777	0	2.37944	1.18443	5.71066	12.6904	0.18506	0.01586	0	0.31725	5.32995	0	0	6.21827	2.07276	1.48054	1.74492	5.42865	3.85998	5.55203	0	1.58629	0.39481	2.43232	11.4213	0.17625	0	0	0.52876	1.97406	0	0.282	2.46757	1.87535	1576	>500	9	3
OSTEO	0	0.32092	20.1112	19.8973	10.2696	0	0	0	10.9114	12.9439	1.20347	0	0	0	14.3774	0	0.16046	2.48181	5.39153	0.21394	0.37441	12.5517	13.9067	6.20454	0	0.26743	0	5.24176	9.94865	0.84688	0	0	0.32092	11.1824	0	0.16046	1.52617	3.39467	1558	>500	9	3
OSTEO	6.42674	2.16902	6.42674	30.6341	1.28535	0	0.53556	0	1.92802	5.14139	0.16066	0.0964	0	0	8.99743	1.28535	0.241	5.56984	2.99914	3.21337	1.3389	5.35561	21.1904	1.23179	0.0714	1.24964	0	0.96401	4.14167	0.26778	0.03213	0	0	9.69723	1.07112	0.39274	5.99829	0.6998	1556	>500	8	3
IPB	0	1.06383	17.0213	13.6879	5.31915	0	0	0	7.65957	14.7518	0.07092	0.46808	1.98582	0	5.56028	0	0.85106	5.16312	3.1773	0.85106	0.42553	10.3073	7.54137	2.69504	0	0.2364	0	2.2695	9.64539	0.47281	0.15602	1.19149	0	2.64775	0.9929	0	2.08983	2.91253	1175	>500	2	3
OSTEO	3.40426	2.02128	0.56737	6.73759	5.31915	0	0.3546	0	0.42553	9.64539	0	0	0.39716	0	7.94326	0	0.85106	12.7092	0	1.13475	0.9929	0.85106	5.95745	3.47518	0	0.3546	0	0.85106	5.67376	0.08274	0	0.39716	0	3.70686	0	0.18912	10.1749	0	1175	>500	19	3
OSTEO	0.64102	0.16025	13.2479	2.40385	10.8974	0	0	0	8.65385	27.7778	0.0267	0.03205	0.59829	0	1.19658	0	0	3.71795	0	1.06838	0.10683	9.90028	1.49573	8.06624	0	0.35612	0	6.51709	16.5242	0.0178	0	0.99715	0	0.89743	0	0	2.20798	0	1560	>500	4	3
OSTEO	0	0	6.71946	17.5786	8.63931	0	0	0	7.19942	10.5592	0.02999	0	0.67194	0	6.38349	2.15983	0	0.38396	1.34389	0	0.26997	7.67939	12.799	7.25942	0	0.59995	0	5.15959	12.159	0	0.00599	2.01584	0	3.6957	3.23974	0.47996	0.25597	1.67987	1389	>500	16	3
OSTEO	0	2.77778	14.2857	24.4048	3.96825	0	0	0	9.52381	13.7566	0.03306	0	1.48148	0.39682	5.92593	0	0	6.13757	7.03704	0	1.91799	10.3175	10.2734	2.38095	0	0	0	4.49735	7.40741	0.18738	0.04629	0.49382	0.26455	3.7037	0	0	4.30335	3.33333	1260	>500	9	3
OSTEO	0	1.25125	17.6843	15.2653	10.01	0	0.83416	0	1.001	2.002	1.25125	0.2002	0.46713	0	11.6784	0	0.91758	2.33567	8.87554	0	0.79245	9.00901	8.86998	5.50551	0	0.69513	0	1.5015	1.11222	0.23634	0.13346	0.31142	0	7.00701	0	0.30586	1.63497	7.62985	999	>500	2	3
IPB	0.63411	1.82308	15.0074	44.9165	13.3164	0	0.26421	0	1.26823	12.2596	0	0.17438	0.88776	0	1.77552	0	0	3.84697	8.28577	0	0.58127	6.83435	21.1724	5.81272	0.14091	0.70457	0	1.69097	4.93201	0.31705	0.02642	0	0	2.466	0	0.14091	1.28232	4.14289	1577	>500	19	3
IPB	0	0	4.95663	4.64684	0	0	0	0	7.43494	0	0	0	0	0	0	0	0	0	0	0	0	2.47831	5.98926	0	0	0	0	2.47831	0	0	0	0	1.23916	0	0	0	0	0	269	<300	9	3
OSTEO	0	1.37808	15.9965	27.5616	4.37743	0	0	0	11.0246	12.1055	0	0	0	0.32425	9.98703	1.94553	0.5134	5.40424	0	0	1.08085	11.529	21.9592	2.75616	0	0.18014	0	7.67402	6.66523	0.03602	0	0.20175	0.32425	6.35538	0.43233	0.07205	3.99193	0	1542	>500	16	3
IPB	16.2075	2.22853	18.6386	10.94	1.21556	0	2.02593	0	5.67261	9.72447	0.27012	0.16207	0.37817	0.81037	9.83252	0	1.0805	0.75634	1.5127	9.72447	1.24932	11.0751	9.00414	0.81037	0	1.91338	0	2.97137	7.02323	0.09004	0.14856	2.01693	0.27012	6.93319	0	0.60777	0.69331	0.50423	1234	>500	2	3
IPB	2	2.08333	0.88888	2.66667	3.33333	0	0	0	0	1.55556	0.22222	0	0	0	2.48889	0	1.33333	1.6	2.8	3.33333	0.77777	0.59259	1.03704	2.11111	0	0	0	0.44444	0.37037	0.16666	0.02222	0	0	1.76296	0	0.59259	0.91851	2.28148	1500	>500	2	3
IPB	0	0.6887	16.5289	9.18274	0	0	0	0	2.75482	0	0	0	0	0	0	0	0	0	10.2847	0	0	8.57055	5.50964	4.13223	0	0	0	0.91827	0	0.07652	0.04591	0	0	0	0	0	0.42852	5.14233	363	300-500	9	3
OSTEO	0	2.71084	3.21285	22.0883	5.42169	0	3.01205	0	8.43373	1.60643	0.251	0.06024	0	0	7.30924	0	0	5.66265	1.1245	0.4016	1.00402	2.40964	12.3159	2.40964	0	1.33869	0	5.22088	2.40964	0.03346	0	1.87416	0	2.81124	0	0	2.71754	0.74966	830	>500	16	3
IPB	0.63613	0.63613	8.90585	10.9203	6.04326	0	1.59033	0	3.18066	4.24088	0	0.15903	0.59372	0	7.71841	0.63613	0	4.70738	6.82782	0	0.10602	6.99746	10.9909	4.02884	0	0.97186	0	3.07464	5.51315	0.15903	0.0318	1.18745	0	9.79644	0.63613	0	3.22307	3.76025	1572	>500	16	3
IPB	0	0.33068	8.59788	12.7866	3.96825	0	0.55114	0	1.65344	1.76367	0.33068	0.0992	1.85185	0	3.08642	0.66137	0.22045	9.25926	2.16049	0	0.22045	3.7478	5.38286	1.76367	0	0.18371	0	1.32275	0.73486	0.16534	0.04409	0.72016	0	1.54321	0.44091	0.14697	4.31364	2.57202	1512	>500	2	3
OSTEO	3.5524	1.33215	5.03256	22.8686	15.0977	0	0	0	6.2167	16.5779	0.074	0.0666	0.41444	0	8.28893	2.6643	0	2.01303	4.14446	2.96033	0.66607	4.93389	14.1849	11.6193	0	0	0	3.5524	6.31537	0.14801	0.0296	0.27629	0	6.63114	0.88809	0	2.42747	3.59187	1126	>500	8	3
IPB	0	0	0	0	0	0	0	0	0	0	0	0	0	0	0	0	0	0	0	0	0	0	5.95238	5.95238	0	0	0	0	0	0	0	0	0	0	0	0	0	0	14	<300	2	3
OSTEO	0	0.58685	10.0157	7.51174	10.7981	0	0	1.97183	8.4507	14.3975	0.03912	0	0	0	0.43818	0	0	2.19092	2.19092	0	0.23474	6.15545	5.16432	6.10329	0	0	1.75274	5.16432	8.55503	0.09128	0	0.58424	0	0.29212	0	0	1.46062	0.87636	1065	>500	10	3
OSTEO	0	0.84622	19.3424	21.7601	10.8801	0	0.80593	0	8.70406	14.1844	0.16118	0	0	0	2.70793	0	0.48355	2.83688	8.12379	0	1.1283	10.101	12.68	8.46228	0	0.26864	0	4.51322	9.02643	0.12088	0	0	0.32237	1.80529	0	0.83279	1.7838	5.71674	1034	>500	9	3
IPB	1.27632	0.7977	13.6141	7.97703	7.65795	0	0.7977	0	3.82897	8.08339	0.07977	0.04786	0.59561	0	2.68028	0.63816	0.42544	1.74431	6.5518	1.27632	0.82429	8.79246	8.45565	3.82897	0	0.2659	0	1.70177	5.81437	0.13295	0.0319	0.89342	0	1.78685	0.74452	0.28362	1.05651	3.97079	1567	>500	19	3
OSTEO	0	1.98687	20.0415	19.8687	12.6123	0	0	0	14.5128	13.8217	0.11518	0.24187	0	1.72771	10.9652	0	0.46072	5.78208	6.77263	0.23036	1.00783	11.2877	12.1516	8.81133	0	0.09598	0	8.29302	11.9788	0.07678	0.13245	0.53751	0.5759	7.09514	0	1.05582	3.80097	3.87008	1447	>500	4	3
IPB	1.63132	0.81566	1.90321	12.8467	0.40783	0	0.33985	0	0	0.54377	0.03398	0.04078	2.28385	0	6.09027	0	1.08755	1.14192	3.04513	2.1751	0.7137	0.6344	8.49647	0.54377	0	0.90628	0	0	0.72503	0.05664	0.08836	1.64945	0.27188	3.17201	0.13594	0.81566	1.26881	2.41073	1226	>500	2	3
OSTEO	0	0	4.12541	8.86964	4.9505	0	0	0	2.47525	9.90099	0	0	0	0	0	0	0	0	0	0	0	1.37514	1.78768	1.44389	0	0	0	1.65017	0	0.06875	0	0	0	0	0	0	0	0	404	300-500	19	3
OSTEO	0	0	0	0	0	0	0	0	0	0	0	0	0	0	0	0	0	0	0	0	0	0	0	0	0	0	0	0	0	0	0	13.5266	0	0	0	0	0	0	23	<300	2	3
OSTEO	3.1348	1.66536	5.22466	11.9514	5.09404	0	0.32654	0	2.3511	3.1348	0.09796	0.07836	0.36572	0	5.12017	0	0.52246	3.23929	3.65726	1.30617	0.78369	5.8342	8.11999	5.48589	0	0.21769	0	3.9185	3.65726	0.11973	0.01306	0.48763	0	3.53535	0.26123	0.17415	2.56008	1.95054	1276	>500	8	3
OSTEO	0	2.70013	17.1537	12.8124	12.7065	0	1.05887	0	14.6125	12.2829	0.52943	0.04764	0	0	6.22618	0	0	7.15798	5.63321	0.42354	1.64125	14.7536	10.4299	9.52986	0	0.97063	0	9.63575	11.0123	0.31766	0.01058	0.19765	0	6.22618	0	0.14118	4.60963	3.36016	1574	>500	9	3
IPB	0	0.33602	0	16.8011	0	0	0.56003	0	0.33602	0.89605	0.16801	0	0	0.33602	5.01792	0	1.34409	0	0.62724	0.44802	0.56003	0	10.4913	0	0	0.18667	0	0	0.59737	0.01866	0	0	0.22401	2.92712	0	0.22401	0.15681	0.41816	1488	>500	19	3
IPB	0	2.0362	11.1614	12.368	5.88235	0	1.13122	0	9.50226	11.4631	0.18853	0.22624	0.84464	0	16.0483	0	0	6.90799	2.53394	0	0.45248	8.54701	7.74258	5.50528	0	1.5083	0	5.42986	7.03871	0.02513	0.09049	0	0	11.9658	0	0	5.10809	3.09703	1105	>500	16	3
OSTEO	9.24703	8.66909	5.50418	82.7279	1.98151	0	4.95376	0	3.30251	9.68736	1.321	0.1321	8.63056	0	43.461	6.93527	4.18318	6.47292	4.93175	3.74284	2.20167	4.84368	40.0154	2.20167	0	1.46778	0	0.22016	3.08234	0.56876	0.05504	5.13724	0	16.3364	5.61427	1.26596	0.70453	1.02745	1514	>500	16	3
IPB	0	0	0	0	0	0	0	0	0	0	0	0	0	0	12.8736	0	0	0	0	0	0	0	0	0	0	1.91571	0	0	3.06513	0.28735	0	0	0	16.092	0	0	0	2.14559	145	<300	9	3
OSTEO	0	1.16913	4.93635	7.40452	3.89712	0	0.64951	0	1.55885	3.11769	0.09742	0.01948	0	0	2.90985	1.94856	0	0.18186	1.09119	0	1.03923	4.50333	3.70226	4.09197	0	0.32475	0	1.42894	2.07846	0.03247	0	0.12124	0	1.45492	0	0.1732	0	0	1283	>500	19	3
OSTEO	0	0	12.87	5.79151	6.75676	0	0	0	0	5.14801	0	0	0	0	0	0	0	5.40541	0	0	0.32175	3.432	4.719	3.53925	0	0	0	0	5.14801	0	0	0	0	1.2012	0	0	4.2042	0	259	<300	19	3
OSTEO	3.82409	1.91205	4.88634	12.2158	3.02741	0	0.53112	0	4.46144	8.07308	0.29211	0	0.59485	0	0.89228	0.63734	0	2.82558	0	2.1245	1.24814	5.87777	7.87834	2.01827	0	0.53112	0	2.44317	3.54083	0.09737	0	0.19828	0	1.78458	0.21244	0	2.75476	0	1569	>500	4	3
IPB	0	2.38636	9.09091	7.04545	10.9091	0	1.51515	0	0	26.0606	0.37878	0.04545	0	0	2.54545	0	1.74242	2.60606	1.69697	0.30303	1.06061	6.16162	5.42929	8.33333	0	1.13636	0	0.60606	16.7677	0.20202	0.01515	0	0	1.13131	0.15151	1.0101	2.06061	1.41414	1100	>500	4	3
OSTEO	0	0.50167	4.68227	18.7291	4.01338	0	1.67224	0	4.68227	1.78372	0	0.16722	0	0	4.05797	0	0.61315	11.2375	2.49721	0	0.33444	2.60126	11.5199	2.89855	0	1.39353	0	1.11483	0.14864	0.05574	0.03344	0	0	1.87291	0	0.16722	6.13898	0.8324	1495	>500	4	3
IPB	0	0	19.0476	6.34921	0	0	0	0	0	0	0	0	0	0	8.88889	0	0	0	0	0	0	2.1164	2.1164	0	0	0	0	3.1746	0	0	0	0	0	2.96296	0	0	0	0	105	<300	8	3
IPB	1.25945	1.49559	14.2737	15.4282	8.02897	0	0	0	5.66751	11.335	0.05247	0.03148	0	0.31486	4.11419	0.62972	1.25945	2.47691	0.58774	0	0.78715	9.86566	7.71411	4.40806	0	0.17492	0.19591	2.51889	9.23594	0.03498	0.02099	0.19591	0	3.82032	1.04954	0.83963	1.05654	0.78365	1588	>500	16	3
IPB	0	0.73902	19.7072	19.2849	14.147	0	0	0	9.29054	10.6982	0.10557	0.02111	0	0	8.07995	0	0	1.40766	3.94144	0	0.66863	14.3581	12.2935	9.71284	0	0.1173	0	6.75676	8.63363	0.08211	0	0	0	5.51802	0.14076	0	1.57658	2.49625	1184	>500	10	3
IPB	0	0.17482	5.12821	4.07925	1.04895	0	0.58275	0	1.3986	7.45921	0.02913	0.06993	0	0	3.2634	0	1.3986	1.30536	0.32634	0	0.29137	4.4289	3.32168	0.9324	0	0.48562	0	0.4662	6.52681	0.03885	0.01165	0.21756	0	3.91608	0	0.3108	0.43512	0.43512	1430	>500	2	3
OSTEO	3.81679	2.3855	16.7515	10.6022	7.63359	0	0.53011	0	11.7684	3.81679	0.18553	0	2.07803	0	3.56234	3.81679	0.63613	4.53774	0	1.48431	1.11323	8.55245	7.8633	6.57337	0	0.88351	0	8.05768	8.19904	0.10602	0	0.1979	0	3.36443	1.9084	0.63613	3.44925	0.29686	1572	>500	16	3
OSTEO	4.72813	0	1.0507	6.23851	1.57604	0	0	0	0	6.82952	0	0	0	0	1.47097	0	0	0	1.47097	1.0507	0.36117	1.75116	3.76499	1.70738	0	0	0	0.65668	2.80186	0.04377	0	0	0	1.47097	0	0.17511	0.70046	1.47097	1269	>500	19	3
IPB	3.81922	0	8.48716	17.5578	4.61489	3.81922	0.79567	0	7.63845	7.21409	0.07956	0.06365	0	0	8.91152	1.90961	0.42435	9.01761	1.1882	1.48525	0	5.94101	7.5854	3.554	3.39487	0.35363	0	7.21409	5.23375	0.09724	0.02652	0	0	6.13905	1.90961	0.14145	6.15319	0.5941	1571	>500	16	3
OSTEO	0	0	14.4004	16.7021	14.8725	0	0	1.322	6.37394	25.0236	0.05901	0.07082	0	0	18.1775	0	1.94759	4.41454	12.559	0	0.26558	9.2068	11.4692	9.79698	0	0.19672	0.88133	4.36733	16.9578	0.07869	0.0059	0	0	9.14385	0	0.6787	3.51747	6.94051	1412	>500	9	3
IPB	0	0.36443	3.88727	12.1477	2.91545	0	0	0	2.91545	5.8309	0.24295	0.07288	0	0	2.72109	0	0	1.36054	0	0	0.97181	3.56333	5.50696	1.94363	0	0	0	5.345	3.88727	0	0.07288	0	0	1.81406	0	0	0	0	343	300-500	2	3
IPB	1.443	0.18037	12.025	4.81	8.29726	0	0.60125	0	2.1645	4.81	0.2405	0.01803	0	0	3.0303	0	0.962	5.43531	2.6936	1.2025	0.66137	10.4217	3.30688	7.03463	0	0.60125	0	1.924	3.52734	0.08016	0.05411	0	0.18037	3.14254	0	0.7215	4.02437	2.91807	1386	>500	2	3
IPB	0	0	0	0	0	0	0	0	0	0	0	0	0	0	0	0	0	0	0	0	0	0	0	0	0	0	0	0	0	0	0	0	0	0	0	0	0	0	1572	>500	16	3
IPB	2.01005	4.0201	1.34003	9.54774	3.51759	0	0	0	0	2.68007	0.29313	0.201	0.46901	0	7.9732	0	1.17253	0.53601	1.87605	1.00503	1.50754	2.23339	7.76103	1.50754	0	0.27917	0	1.34003	3.79676	0.34896	0.10887	0.46901	0.1675	10.1619	0	0.90731	2.38973	3.28308	995	>500	2	3
OSTEO	3.34672	6.19143	0.89245	4.12762	0.33467	0	1.95225	0	2.00803	0	0.83668	0.1004	0	0	13.7439	1.33869	0.44622	0.44622	4.06069	3.34672	1.95225	0	4.35074	0.7809	0	1.20854	0	1.5618	0.14874	0.2417	0.10597	0	0	8.64198	0.66934	0.07437	0.29748	3.12361	1494	>500	9	3
OSTEO	0	0	13.1846	10.311	7.86004	0	0.42258	0	4.56389	6.08519	0.2958	0	1.41988	0	19.8783	0	0.33806	2.36646	0.94658	0.67613	0	11.1562	8.3108	5.24003	0	0.98602	0	2.5355	4.56389	0.18311	0.0169	0.15776	0	19.0895	0	0.22537	1.83683	1.57764	986	>500	9	3
IPB	0	0.74019	6.90846	4.44115	6.84678	0	1.23365	0	1.11029	4.81125	0.03084	0.22205	0	0	6.90846	0	0.49346	7.698	0.69084	0	0.80187	5.51032	2.81684	3.26918	0	0.51402	0	1.85048	3.33087	0.14392	0.08018	0.34542	0	3.10881	0	0.16448	4.35069	0.46056	1351	>500	2	3
IPB	0	0	16.8539	0	11.236	0	0	0	0	0	0	0.14044	0	0	5.24345	0	0	0	7.86517	1.87266	0	1.87266	0	5.61798	0	0	0	0	0	0	0	0	0	3.49563	0	0	0	3.49563	178	<300	16	3
OSTEO	1.40944	0.17618	11.9803	16.972	16.2086	0	0.8809	0	8.45666	15.9737	0.29363	0	0.65774	0	5.91966	0	0.46981	3.89946	2.63096	0.70472	0	8.22175	8.80902	8.33921	0	0.19575	0	3.17125	9.7095	0.17618	0	0	0	3.2887	0	0.3132	2.99115	1.53473	1419	>500	8	3
IPB	0	0.86132	4.59374	6.38817	10.7666	0	0.71777	0	0	7.46483	0.6101	0	0.40195	0	2.41171	0.86132	0.43066	1.95234	2.00976	1.14844	0.64599	4.59374	5.81395	7.39305	0	1.19629	0.26796	0	3.82812	0.1914	0.00717	0.40195	0	2.00976	0	0.76562	1.97148	4.01952	1161	>500	9	3
IPB	0	2.06782	8.2713	9.64985	11.5798	0	0	0	0	12.9584	0.06892	0.04135	0	0	13.1238	0	0	7.52688	3.08795	0	1.37855	4.77897	6.54811	5.44527	0	0	0	1.24069	5.97372	0	0	0	0.48249	8.10587	0.13785	0	5.78991	2.31596	1209	>500	8	3
IPB	0	0.86355	10.9384	11.5141	7.34024	0	0.71963	0	12.0898	26.4824	0.86355	0.12953	1.61197	0	11.2838	0	0	2.07254	4.02994	0.5757	0.43177	8.15582	7.70006	6.90846	0	0	0	5.18135	21.3011	0.55171	0.05037	0.53732	0	5.10459	0	0	0.86355	1.74631	1158	>500	19	3
OSTEO	0	0	0	21.6049	0	0	0	0	0	0	0	0	0	0	0	0	0	4.32099	0	0	0	0	11.3169	0.7716	0	0	0	0	4.11523	0	0	0	0	5.76132	0	0	4.32099	0	108	<300	10	3
IPB	0	0.36127	12.5241	12.5241	2.89017	0	1.20424	0	4.33526	3.85356	0.36127	0	0	0	6.06936	0	0	2.89017	1.34875	0	0.36127	8.99165	11.5607	1.44509	0	0	0	1.92678	1.92678	0	0	0	0	5.61978	0	0	3.59666	1.57354	692	>500	2	3
OSTEO	0	0	0	0	0	0	0	0	0	0	0	0	0	0	0	0	0	0	0	0	0	0	0	0	0	0	0	0	0	0	0	0	0	0	0	0	0	0	1572	>500	9	3
IPB	1.47601	0.9225	9.8401	43.8499	7.56458	0	0.615	0	5.16605	13.5301	0.369	0.1107	0.6888	0	10.6765	0.369	1.23001	4.42804	9.9877	0	0.3075	6.88807	30.8118	5.96556	0	0.205	0	4.42804	7.50308	0.1025	0.20295	0.6888	0	7.34727	1.72202	0.984	2.72243	6.19926	1355	>500	2	3
OSTEO	4.49236	1.46002	4.79185	3.81851	2.24618	0	1.12309	2.09644	0	0	0.07487	0	0.83857	0	5.45073	0.89847	0	4.61216	2.51572	1.19796	0.22461	3.09474	3.26944	2.99491	0	0.24957	0.27952	0.44923	1.19796	0.28701	0	0	0.07487	4.61216	0	0	2.35599	1.39762	1113	>500	2	3
IPB	0	0.6553	5.24246	4.36872	3.93185	0	0	0	0	2.18436	0	0.19659	0	0	3.66972	0	0	2.53386	0	0	0.32765	5.67934	3.27654	3.16732	0	0.54608	0	1.09218	1.09218	0.0364	0.13106	0.61162	0	2.03874	0.43687	0.29124	3.30566	2.44648	763	>500	2	3
IPB	0	1.01488	0	22.2711	0	0	1.12765	2.21019	0	0.45105	0.3101	0.06765	2.21019	0.50744	19.1024	2.70636	5.52548	0.09021	5.05187	0	0.45105	0.07517	15.5992	0	0	1.03368	1.9997	0	0.15035	0.12216	0.08457	0.84197	0.22552	11.8403	2.02977	2.33048	0.18042	4.63088	1478	>500	2	3
IPB	1.77462	0.44365	2.07039	20.2603	0	0	0.73942	0	0.44365	0.59154	0.22182	0.08873	3.31263	0.88731	4.14079	4.43656	0.22182	0.41407	0	1.77462	0.51759	0.59154	11.9048	0.22182	0	0.49295	0	0	0.78872	0.07394	0.02957	1.10421	0.29577	4.14079	0.88731	0.14788	0	0.27605	1127	>500	2	3
OSTEO	0	0	4.54545	4.67172	6.43939	0	3.15657	0.70707	6.06061	6.06061	0	0.11363	0	0	0.70707	0	0	3.23232	0	0	0	3.0303	0.92592	3.15657	0	1.05219	0.23569	3.53535	3.7037	0.10521	0.06313	0	0	2.12121	0	0	2.39057	0	660	>500	2	3
OSTEO	1.81653	0.90826	9.99092	13.3212	5.90372	0	0.75688	0	11.3533	10.2937	0	0.06811	2.967	0	2.11929	1.81653	0.60551	2.54314	0.84771	1.81653	0.60551	5.65143	9.43587	5.22252	0	0	0	6.0551	10.0918	0.07568	0.03784	1.13029	0	2.11929	2.11929	0	1.83671	1.69543	1101	>500	2	3
IPB	0	0.82918	11.0558	15.6855	16.5837	0	1.38198	0	9.12106	9.39746	0.17274	0.04145	1.93477	0.41459	4.64345	0	0.20729	1.35434	3.09563	0	0.48369	10.0424	10.3188	10.503	0	0.80615	0	5.38972	6.72563	0.01151	0.01381	1.03188	0.13819	3.61157	0	0.06909	0.90289	2.83766	1206	>500	19	3
OSTEO	0	0	0	0	0	0	0	0	0	0	0	0	0	0	0	0	0	0	0	0	1.85185	0	2.46914	0	0	0	0	0	0	0	0	0	0	0	0	0	0	0	90	<300	10	3
OSTEO	14.4927	3.62319	0	0	0	0	0	0	0	0	0	0	0	0	0	0	0	0	0	0	1.20773	0	2.01288	0	0	0	0	0	1.61031	0	0	0	0	0	0	0	0	0	138	<300	19	3
IPB	1.3947	1.3947	3.2543	13.6564	6.9735	0	1.74338	0	0.69735	6.0437	0.02905	0.06973	0.65086	0	17.2478	2.44073	0	3.48675	1.30172	0	0.4649	3.40927	7.574	5.28824	0	0.48427	0	2.3245	4.1841	0.13559	0	1.08477	0.11622	8.6239	0.4649	0	1.89834	1.4102	1434	>500	8	3
OSTEO	0	1.70648	10.4664	10.3527	8.53242	0	1.70648	0	4.09556	11.3766	0.34129	0.06825	1.59272	0	0.95563	0	0.68259	1.91126	6.37088	0	1.08077	7.05347	6.0675	6.02958	0	0.66363	0	2.50284	5.46075	0.30337	0.02275	0.84945	0	0.84945	0.68259	0.11376	1.27418	3.71634	1465	>500	19	3
OSTEO	7.48503	4.67814	0.2495	14.2839	0.56137	0	0	0	0	0	0	0.11227	0	0	12.9241	0	0.56137	0.6986	2.79441	2.99401	1.68413	0.58216	8.10878	0.68612	0	0.41583	0	0	1.87126	0.10395	0.01247	0	0	12.1091	0	0.18712	0.3493	1.39721	1336	>500	2	3
OSTEO	2.99177	0.65445	11.4685	43.3184	9.53628	0	0	0	4.11369	10.0972	0.06232	0.11219	0.69808	0	17.103	0.37397	1.12191	3.14136	4.18848	0.24931	0.49862	10.3881	29.2737	6.35752	0	0	0	0.99725	6.06665	0.06232	0.01246	0.81442	0.06232	12.9145	0.37397	0.62328	2.90867	4.65387	1337	>500	8	3
IPB	1.37363	1.45948	8.4707	8.07005	9.61538	0	0.57234	0	1.71703	10.5311	0.91575	0.13736	1.28205	0.3434	6.73077	0	0	3.52564	0	1.37363	1.20192	5.26557	6.63919	6.69643	0	0.38156	0	1.37363	5.95238	0.41971	0.05723	1.06838	0	5.12821	0	0	2.43437	1.38889	1456	>500	4	3
IPB	1.34499	0.58843	10.7599	5.82829	2.18561	0	0.56041	1.88299	6.3887	8.51827	0.19614	0.15131	0.31383	0	9.72876	0.33624	2.52186	7.73369	4.39363	0	0.53239	7.54689	2.68998	1.06478	0	0.1868	0.41844	5.26788	4.33386	0.2335	0.08406	0	0	5.33513	0.56041	0.56041	4.43847	2.71987	1487	>500	2	3
OSTEO	0	0.4711	3.35008	7.74707	3.1407	0	0	0	3.1407	3.35008	0.13086	0.0314	0	0	1.75879	0	0	1.84255	2.34506	1.67504	0.70665	5.09492	7.53769	4.44933	0	0	0	2.61725	6.42099	0.26172	0.10469	0	0	2.14964	1.15159	0	2.0938	4.39698	1592	>500	16	3
IPB	8.70322	0.65274	0.87032	9.28343	0.87032	0	0	0	0.87032	1.16043	0	0.13054	0	0	5.27995	0	1.16043	0.40615	0.8123	1.74064	0.58021	1.25713	5.70544	0.94284	0	0.48351	0	1.01538	1.54724	0.07252	0.10153	0	0	5.27995	0.58021	0	0.8123	1.08307	1149	>500	2	3
IPB	2.57235	2.09003	7.07395	10.9325	4.50161	0	0.80385	0	3.85852	15.4341	0.13397	0	0	0	10.2036	1.28617	2.09003	6.81672	3.60129	1.7149	1.20579	7.35977	5.85924	2.46517	0	0.35727	0	1.50054	7.71704	0.1429	0	0.10003	0	4.10146	2.14362	1.28617	3.54412	2.70096	1555	>500	4	3
IPB	2.50156	0.54721	12.2994	25.0678	6.8793	0	0	0	4.37774	4.16927	0.13028	0	2.91849	0	5.54513	0	0.20846	6.27476	5.83698	0.83385	0.1824	9.51984	16.017	4.48197	1.38976	0.17371	0	3.02272	3.92606	0.0608	0.03648	1.36196	0	3.9886	0	0	3.11306	3.11306	1599	>500	2	3
IPB	0	1.24378	3.9801	5.3068	2.73632	0	1.65837	0	1.99005	4.64345	0	0	0	0	2.78607	0	0.99502	2.08955	0.92868	0	0.99502	2.76396	5.85959	0.99502	0	2.21117	0	2.6534	4.42233	0.01381	0	0	0	2.63129	0	0	1.3267	0.7739	1005	>500	16	3
IPB	0	0.59808	3.98724	37.2807	5.98086	0	0	0	2.39234	1.5949	0.89712	0	0	0	10.6061	0	0	1.71451	3.34928	0	0.89712	8.10739	20.7004	3.98724	0	0.33227	0	2.79107	3.72142	2.0933	0	0.74428	0	11.3504	0	0	2.12653	2.97714	836	>500	2	3
OSTEO	5.01253	1.56642	1.67084	2.71512	0.62656	0	2.08855	0	0	9.18964	0.41771	0.15664	0	0.62656	5.84795	0	0.31328	9.35673	0	0.83542	0.20885	0.97465	2.85436	1.8797	0	0.69618	0	0.62656	3.89864	0.31328	0.06265	0	0.20885	2.53411	0	0.48732	4.09357	0	798	>500	9	3
OSTEO	1.90718	0.63572	10.3836	18.2242	6.35728	0	1.05955	0	3.17864	8.47637	0.26488	0.06357	2.96673	0	23.7338	1.27146	1.27146	1.18669	7.41683	2.54291	1.74825	7.34619	18.595	3.33757	0	0.44147	0.59334	2.11909	4.662	0.13244	0.01589	2.1756	0	16.8115	0.63572	0	0.89001	4.05453	1573	>500	4	3
IPB	4.3956	1.28205	0.9768	15.0794	3.2967	0	0.30525	0	1.4652	4.884	0	0.07326	2.39316	0	4.44444	0.7326	0.4884	9.52381	0	2.9304	0.8547	0.6512	8.95401	2.01465	0	0.2035	0	1.221	4.884	0.02035	0.04884	1.02564	0	3.53276	0.2442	0.1628	5.92593	0.22792	1365	>500	2	3
IPB	0	0	0	3.26797	0	0	0	0	0	0	0	0	0	0	4.57516	0	0	0	0	0	0	0	1.90632	0	0	0	0	0	0	0	0	0	0	1.52505	0	0	0	0	204	<300	2	3
IPB	1.32275	2.31481	6.61376	7.93651	6.28307	0	1.10229	0	5.29101	4.40917	0.02755	0	0.30864	0	7.40741	0.33068	0.44091	2.38095	0	1.76367	1.95657	5.80541	5.78704	4.9052	0	0.91857	0	6.3933	5.21752	0.04592	0	0.61728	0	5.34979	0	0	2.16784	0	1512	>500	16	3
OSTEO	6.38162	2.07403	10.4233	4.99894	2.55265	0	2.65901	0	12.7632	19.9958	0.15954	0	2.38247	0	5.36056	0	0	2.38247	2.68028	2.12721	1.83472	6.87797	2.62356	2.44629	0	1.41814	0	9.14699	10.9197	0.07977	0	2.58101	0	3.57371	0.21272	0	2.64483	2.08466	1567	>500	16	3
OSTEO	0	2.05158	7.034	3.02853	1.17233	0	0	0	4.10317	1.56311	0.09769	0	1.09418	0	6.01798	0.58616	0	6.44783	0	0	0.29308	0.91181	0.48847	0.19538	0	0	0	0.39077	0.78155	0.03256	0	0.72945	0	1.09418	0	0	1.3547	0	853	>500	16	3
IPB	1.42248	2.04481	10.9056	9.77952	10.1351	0	1.77809	0	2.84495	13.2764	0.02963	0	0.99573	0	11.9488	2.13371	0.94831	4.88383	1.32764	0	0.71123	8.06069	4.68231	4.38596	0	0.69148	0	1.89663	10.4315	0.1778	0.02963	0.44254	0	8.29777	1.54101	0.66184	3.42975	0.99573	1406	>500	2	3
IPB	0	0.45421	11.8702	7.99419	5.81395	0	0.60562	0	2.90698	14.5349	0.21196	0.03633	1.35659	0.36337	4.74806	0	0.72674	2.20446	2.37403	1.45349	0.54505	8.64018	8.49887	3.39147	0	0.60562	0	2.78585	8.39793	0.27252	0.02422	0.90439	0.54505	6.2177	0.24224	0.24224	2.01873	1.58269	1376	>500	2	3
IPB	0	2.43982	7.80742	16.5908	9.10865	0	1.08436	0.60724	8.78334	27.326	0.54218	0.03253	6.07244	5.04229	27.326	3.25309	1.51811	5.59532	18.5209	0	0.81327	4.33745	9.68698	5.964	0	0.54218	0.70845	7.59054	15.7594	0.6235	0.04337	2.8338	1.40967	11.3352	3.46996	0.3253	3.39767	10.5256	1537	>500	9	3
OSTEO	0	0	0	13.5135	41.8919	0	0	0	0	14.4144	0	0	0	0	15.1351	0	0	7.56757	0	0	0	0	7.80781	27.9279	0	0.75075	0	0	14.4144	0.15015	0	0	0	15.976	0	0	3.36336	0	185	<300	2	3
IPB	0	1.01103	1.22549	4.96324	0.36764	0	0.61274	0	0	0.98039	0.39828	0.01838	0.34313	0	4.11765	0	0.09191	7.47549	4.46078	0.49019	0.39828	0.40849	1.81781	0.18382	0	0	0	0	0.49019	0.20424	0.00612	0	0	7.83497	0	0.15318	4.61601	3.43137	1360	>500	9	3
OSTEO	0	0	0	0	0	0	0	0	0	0	0	0	0	0	0	0	0	0	0	0	0	3.7037	2.77778	0	0	0	0	0	0	0	0	0	0	5.18519	0	0	0	0	60	<300	4	3
IPB	8.43608	2.27125	12.7623	18.7108	2.59572	0	1.62232	0	2.59572	6.92191	0.18927	0.4218	2.42267	0	12.4162	0	0.43261	2.50919	3.634	4.75881	1.78456	3.89358	14.0421	0.37854	0	2.34336	0	1.73048	3.46096	0.10815	0.20549	2.7255	0	8.88312	0.10815	0.18025	0.25957	3.23023	1541	>500	16	3
OSTEO	0.67796	0.33898	9.49153	16.4407	9.49153	0	0.56497	0	1.35593	17.6271	0.14124	0.37288	0	0.33898	6.0113	0	0	9.49153	3.16384	0.45197	0.36723	5.04708	10.9793	6.89266	0	1.22411	0	1.80791	10.9981	0.12241	0.20338	0.10546	0.22598	4.53484	0.22598	0	6.41808	2.742	1475	>500	2	3
OSTEO	2.94118	1.71569	6.53595	11.1928	7.10784	0	2.45098	1.83007	4.41176	6.53595	0.49019	0.09803	0	0.49019	11.8954	0.49019	0	6.79739	3.20261	2.61438	1.10294	5.88235	4.73856	1.79739	0	2.04248	0.61002	0.98039	0	0.29956	0.03267	0.61002	0	8.08279	0.32679	0	2.47277	0.76252	1020	>500	2	3
IPB	1.28205	0.96153	8.97436	20.9936	8.01282	0	0.53418	0	8.65385	10.2564	0.69444	0	0.29914	0	2.99145	0	2.13675	4.10256	6.5812	0.42735	0.45405	8.90313	18.5363	6.51709	0	0.26709	0	5.55556	8.15527	0.05341	0	0.29914	0	1.69516	0.21367	0.83689	2.93447	4.58689	1560	>500	19	3
IPB	1.39276	0.52228	3.48189	24.6634	0	0	0.29015	0	0	0	0.29015	0.06963	0	0.34818	7.47447	1.04457	0.26114	4.2247	3.89972	0.46425	0.34818	1.54751	14.3918	0	0.3095	0.29015	0	0.11606	0.15475	0.15475	0.0174	0	0.23212	5.41628	0.69637	0.17409	2.38316	3.7914	1436	>500	2	3
OSTEO	0	2.89645	12.7927	10.741	12.672	0	1.50857	0	1.44823	19.7924	0.24137	0.0362	0	0	15.2064	0.72411	0	2.3413	2.70336	0	1.6896	9.25255	8.10604	6.93942	0	3.21828	0	1.6896	11.5858	0.23131	0.01206	0	0	8.7859	0.96548	0	1.57696	1.35168	1381	>500	8	3
IPB	0	2.46345	7.62873	8.15851	6.35728	0	4.23819	0	4.4501	3.81437	0.13244	0	0	0.31786	21.0638	0	0.31786	6.23013	5.93346	1.27146	1.03306	4.30882	5.12114	3.28459	0	1.58932	0	3.60246	3.24928	0.07063	0	1.38447	0.10595	13.647	0	0.31786	3.65897	4.74677	1573	>500	19	3
OSTEO	0	0	0	9.69757	0.49309	0	0	0	0	0	0.08218	0	0	0	1.84089	0	0.98619	0	4.60224	0	0	0.54788	5.36927	0	0	0.27394	0	0	0.21915	0.16436	0	0	0	2.91475	0	0.32873	0	3.68179	1014	>500	19	3
OSTEO	0	0	7.08535	16.2641	3.1401	0	0	0	4.83092	15.4589	0.24154	0	0	0.48309	3.1562	0	0	4.05797	8.56683	0.96618	0.36231	4.93827	8.82984	3.22061	0.10735	0.26838	0	4.34783	7.30005	0.08051	0	0	0.32206	1.95384	0	0	2.55502	7.21417	1035	>500	19	3
IPB	2.43605	0	2.43605	10.9622	12.1803	0	2.03004	0	7.30816	20.7065	0	0.0609	0	0	0	0	0	2.27365	2.27365	1.62404	0	3.24807	5.9548	9.33821	0	1.01502	0	6.90215	12.7216	0.06766	0	0.37894	0	0	0	0	1.51577	1.13683	821	>500	19	3
IPB	0	4.57497	9.4451	14.4628	10.9209	0	1.96773	0	1.18064	20.4644	0	0	0	0	5.50964	2.95159	0	4.95868	4.40771	0	1.77096	3.01718	6.42792	5.1161	0	1.96773	0	2.55805	6.5591	0.09838	0.01967	0	0	2.20386	3.14837	0.36075	2.25633	2.93848	847	>500	9	3
OSTEO	0	0.92047	14.2366	14.1139	9.5729	0	1.2273	0	12.5184	6.87285	0.3375	0	0	0	2.74914	0.73637	0	1.54639	2.74914	0	0.67501	7.93651	9.28653	6.07511	0	0.40909	0	8.95925	6.13648	0.08181	0.01227	0	0	2.86369	0.8591	0	0.72001	2.06186	1358	>500	10	3
OSTEO	5.07937	0.63492	18.6243	11.2698	16.1905	0.42328	0.5291	0	10.1587	21.7989	0.05291	0	0	0	6.51852	0	1.42857	2.4127	2.37037	5.29101	1.16402	12.8395	9.17108	13.2275	0.28218	0	0	10.582	19.5767	0.15873	0	0.59259	0	4.34568	0	1.02293	1.94004	1.18519	1575	>500	4	3
OSTEO	1.97109	0.5749	10.2935	15.3855	6.5703	0	0	0	7.88436	8.7604	0.62965	0.04927	0	0	7.97197	0.32851	1.31406	1.44547	4.90583	0.21901	0.32851	8.03037	10.987	5.03723	0	0.36501	0	6.5703	7.00832	0.0365	0	0	0	7.35874	0	0.65703	0.74463	2.45291	1522	>500	16	3
OSTEO	0.70771	1.76929	2.59495	6.4284	4.24628	0	0.29488	0	4.60014	3.30267	0.08846	0.03538	0	0.35385	2.9724	0	0	1.50979	1.32107	0.4718	1.76929	3.53857	5.72069	5.01297	0	0.29488	0.88071	2.83086	3.77448	0.30471	0.02359	0.99079	0.35385	2.09169	0	0.11795	1.79288	2.64213	1413	>500	16	3
IPB	0	2.71219	18.294	4.67986	11.806	0	1.86131	0	5.74346	12.7632	0	0	2.08466	0	4.16933	0	0	2.76537	2.08466	0	1.83472	12.5505	3.43898	9.57243	0	2.12721	0	3.40353	7.1616	0	0.04254	1.29051	0	2.2832	0	0.14181	2.45338	0.99269	1567	>500	4	3
OSTEO	1.40252	0.08765	9.11641	8.29827	12.2721	0	0	0	4.5582	5.6101	0	0	0	0.35063	1.30902	0.70126	0	4.25432	1.96353	1.40252	0.23375	5.76593	6.09709	6.31136	0	0.09739	0	3.27256	4.83092	0.17531	0	0.32725	0.70126	2.39988	0.93501	0	3.75565	2.07262	1426	>500	19	3
OSTEO	3.97219	3.35154	6.28931	6.20655	4.46872	0	3.31016	0	0	4.63423	0.08275	0.0993	0	0	2.78054	0	0.66203	1.52267	0	3.97219	2.27574	3.08948	2.89639	1.48957	0	2.48262	0	0	1.9861	0.01379	0.04965	0	0	0.61789	0	0.08275	0.1324	1.08132	1007	>500	2	3
OSTEO	0	0	0	5.95238	2.97619	0	0	5.55556	0	0	2.48016	0	0	0	0	0	0	0	0	0	0	2.6455	4.29894	0.99206	0	0	3.7037	0	2.6455	0.49603	0.0992	0	0	1.85185	0	0	0	3.7037	84	<300	9	3
OSTEO	3.88853	0.81011	1.94426	5.34673	0.32404	0	0.54007	0	1.62022	0	0.027	0.19442	0	0	3.62929	0	0	5.44394	0.90732	2.59235	0.91812	1.58422	4.26658	0.37805	0	0	0	0.97213	0	0.027	0.11341	0	0	2.31872	0	0	3.6797	0.8065	1543	>500	8	3
IPB	1.33511	2.16956	21.8069	12.016	13.0174	0	1.66889	0	10.6809	11.571	0.05562	0	0	0	9.65732	0	0.66755	3.33778	1.24611	1.78015	1.36293	14.0187	7.75108	9.51268	0	1.57618	0	7.12061	9.79083	0.09271	0	0	0	7.47664	0	0.66755	1.95075	0.83073	1498	>500	10	3
IPB	0	0	0	6.00962	0	0	2.00321	0	9.61538	0	0	0	0	0	4.48718	0	0	6.73077	0	0	0	0	7.74573	0	0	0	0	5.60897	0	0.06677	0	0	0	14.2094	0	0	4.48718	8.2265	208	<300	9	3
IPB	0	0.80385	6.64523	33.9764	2.2508	0	0.80385	0	1.92926	8.57449	0	0	0	0	3.60129	0	0.96463	0	1.20043	0	0.93783	3.5727	24.0086	1.92926	0	0.44658	0	2.2508	8.00286	0.02679	0.01071	0	0	2.70096	0	0.42872	0	0.20007	1555	>500	4	3
OSTEO	6.93241	2.59965	12.1317	9.7487	9.96534	0	1.44425	0	2.16638	4.62161	0.21663	0.04332	2.42634	0	16.1756	0	3.39399	1.09763	6.47025	3.4662	1.58868	6.73984	9.24321	7.65453	0	0.48141	0	2.3108	3.89948	0.09628	0.02888	1.75236	0	13.2101	0	1.66089	1.27094	4.04391	1154	>500	9	3
OSTEO	0	1.59847	11.7221	19.2882	14.2263	0	1.59847	0	2.87724	17.0503	0.02664	0.03196	1.4919	0	5.37084	0.63938	0	4.85934	5.9676	0	0.69266	8.80932	11.7576	8.89812	0	1.42086	0	5.11509	14.6348	0.06216	0.02131	1.09406	0	6.06706	0.63938	0	2.74226	4.77408	1564	>500	4	3
OSTEO	0	0	0	5.06971	0	0	0	0	7.60456	12.6743	0	0	0	0	3.5488	0	0	0	0	0	0	1.26743	4.85847	0	0	0	0	3.80228	5.06971	0	0.03168	0	0	0	0	0	0	3.5488	263	<300	4	3
IPB	0	0.33579	7.38751	9.29035	4.86904	0	0	0	3.02216	8.50683	0.22386	0.10073	2.50728	0	3.13409	0.67159	0	1.83568	7.52183	0	0.67159	8.58145	9.92463	5.37273	0	0.27982	0	3.80569	5.82046	0.38243	0.04477	1.0447	0	2.71622	1.11932	0.29848	2.76099	6.99948	1489	>500	2	3
OSTEO	1.26904	1.90355	12.0558	7.50846	5.71066	0	0.52876	0	2.53807	11.1041	0.15862	0.04758	1.77665	0	5.92217	1.26904	1.05753	1.9247	1.18443	0.42301	1.42766	9.72927	3.87761	3.54272	0	0.17625	0	3.06684	7.43796	0.17625	0.02115	0.78962	0.10575	2.56627	1.05753	0.33488	1.31134	1.38184	1576	>500	4	3
OSTEO	3.23625	0.80906	2.1575	5.03416	6.47249	0	0	0	2.1575	2.87666	0	0.26968	0	0	7.55124	0	2.1575	0	2.01366	0.71916	0.17979	0.83902	5.09409	2.51708	0	0	0	0.71916	0.95888	0.11986	0.08989	1.00683	0	5.36977	0	2.39722	0.67122	2.68489	927	>500	8	3
IPB	1.28205	0	11.5385	13.4081	6.08974	0	0	0	10.8974	20.0855	0	0	0	0	9.57265	0	0.32051	2.5641	2.39316	0.8547	0.05341	7.05128	5.80484	2.67094	0	0	0	8.33333	8.97436	0.10683	0.01602	0.19943	0	3.88889	0	0.10683	1.62393	1.59544	1560	>500	19	3
IPB	5.71429	1.78571	0.95238	14.4048	0	0.95238	1.78571	0	0	0	0.05952	0.14285	0	0	6.66667	0	0.95238	0	4	0	0.23809	0.31746	10.6349	0	0.63492	0.79365	0.22222	0	0.31746	0	0.09523	0	0.47619	6	0	0	0	3.11111	700	>500	9	3
IPB	0	0.27716	19.9556	3.32594	0	0	0	0	6.65188	11.0865	0.04619	0	0	0	1.55211	0	0	1.03474	0	1.84775	0.36954	11.5792	4.00345	0.73909	0	0.61591	0	4.06504	7.02143	0.15397	0	1.37965	0	2.58684	0	0	2.1557	1.03474	902	>500	8	3
IPB	1.30039	0.48764	11.27	16.58	0.81274	0	0	0	4.87646	11.27	0.10836	0.0325	0	0	3.03424	0	0	7.84569	3.64109	2.60078	0.21673	4.47912	10.1503	1.24621	0	0	0	2.70915	5.49054	0.14448	0.04334	0	0	3.03424	0	0	6.19853	3.53995	1538	>500	8	3
OSTEO	5.5991	3.91937	13.4378	14.651	7.27884	0	0.46659	0	3.91937	13.4378	0	0.05599	2.09033	0	12.542	1.11982	0	7.46547	9.40649	1.49309	1.39978	7.0922	11.416	3.5461	0	0	0	2.23964	4.72813	0.12442	0.07465	0.69677	0	6.79358	0.74654	0	3.50877	5.57422	893	>500	8	3
OSTEO	0	0	0	333.333	0	0	0	0	0	1333.33	0	0	0	0	0	0	0	0	0	0	0	0	111.111	0	0	0	0	0	1555.56	0	0	0	0	0	0	0	0	0	1	<300	8	3
OSTEO	3.39751	3.53907	0.755	1.98188	6.51189	0	0	0	0	0.3775	0.09437	0.11325	0	0	12.684	0	1.8875	8.45602	2.11401	1.51	1.8875	0.3775	2.7998	3.96376	0	0	0.35233	0.56625	0.62916	0.28312	0.03775	0.35233	0	8.98452	0	2.64251	7.75135	0.70466	883	>500	8	3
OSTEO	5.93668	0.74208	14.0721	20.0088	5.27704	0	1.64908	1.84697	14.8417	8.79507	0.65963	0.06596	0.92348	0.65963	4.61741	1.64908	0.21987	5.5409	6.15655	3.07828	0.71459	9.08824	13.614	4.50748	0	1.37423	0.71826	7.69569	8.20874	0.83369	0.04947	1.1287	0.05496	6.46438	1.31926	0.51304	3.69393	4.51481	1516	>500	9	3
IPB	0	0.501	2.67201	9.60254	2.00401	0	0	0	1.002	2.67201	0	0.0501	0.4676	0	1.87041	0	0	3.74081	0	0	0.334	1.002	6.84703	0.668	0	0.4175	0	1.002	4.89869	0	0.0167	0.31173	0	3.11735	0	0	2.70541	0.15586	998	>500	4	3
IPB	1.72117	1.07573	4.01606	26.7499	6.23924	0	0	0	1.72117	13.7694	1.57774	0.55938	0.4016	0	20.8835	1.29088	1.07573	8.20425	3.21285	0.57372	1.11159	2.67738	13.9128	4.44636	0	0.23905	0	1.00402	4.20731	0.57372	0.25817	0.26773	0.14343	13.5207	1.43431	1.17135	4.32205	1.20482	1162	>500	2	3
OSTEO	0	0.51738	0.27593	9.17494	0	0	0.68984	0	0	0	0.48289	0	0	0	9.27152	0	0	0	3.09051	0.55187	0.75883	0.27593	4.62196	0	0	0.45989	0	0.27593	0.36791	0.10347	0	0	0	4.37822	0.55187	0	0	1.54525	1208	>500	9	3
OSTEO	8.51064	2.12766	2.83688	29.4326	8.51064	0	0	0	4.25532	5.67376	0.53191	0	0	0	9.92908	0	0	3.97163	7.94326	5.67376	2.12766	8.98345	24.4681	15.9574	0	0	0	2.83688	17.9669	0.76832	0.03546	0	0	6.61939	0	0	7.94326	0	235	<300	9	3
IPB	7.06357	1.51362	7.39993	14.968	1.51362	0	0	0	12.109	20.6862	0.25227	0	0	0.25227	14.1271	1.51362	0	0.9418	10.8308	4.37269	0.92499	4.82117	9.61431	1.00908	0	0	0	5.38177	18.7801	0.05606	0.01681	0.4709	0.50454	9.73203	4.54087	0	0.9418	6.4357	991	>500	19	3
OSTEO	0	0.10212	1.63399	11.0975	2.24673	0	0	0	0	4.3573	0	0.04084	0	0	1.52505	2.85948	0	0.57189	1.52505	0.27233	0.13616	1.72476	6.37709	1.42974	0	0.11347	0	0	2.26943	0.11347	0.02723	0.25417	0	0.63543	1.77015	0	0.61728	1.0167	1224	>500	19	3
IPB	0	0.49212	15.0919	7.70997	6.39764	0	0	0	3.93701	13.1234	0.16404	0.09842	0	0	4.59318	0	0	0.45931	3.67454	0	0	9.40507	4.86658	5.41339	0	0	0	2.46063	12.4672	0.21872	0.0164	1.22485	0	1.83727	0	0	0.32808	3.36833	1016	>500	9	3
IPB	0	0	5.74713	4.44096	6.26959	0	0	0	0	1.04493	0.58777	0	1.4629	0	5.12017	0	2.3511	0.73145	6.58307	0	0	4.17973	4.61512	4.31034	0	0	0	1.30617	0.34831	0.32654	0	1.4629	0	2.43817	0.26123	1.08847	0.97526	4.38871	638	>500	9	3
OSTEO	0	0	7.15842	6.92499	14.4725	0	0	0	3.73483	7.78089	0	0.35014	0	0	7.40741	0	2.25646	2.61438	0	0.62247	0	3.31985	3.99419	9.25926	0	0	0	4.20168	10.582	0.06484	0.21786	0	0	5.374	0	1.21901	1.88816	1.45243	1071	>500	9	3
OSTEO	0.88888	0.77777	24.2963	5.33333	6.66667	0	1.11111	0	2.66667	3.7037	0.14814	0	3.31852	0	8.71111	0	0	2.60741	9.12593	0	1.40741	16.7901	3.38272	4.07407	0	0.49382	0	3.85185	2.5679	0.07407	0.0074	3.8716	0	8.71111	0	0.59259	3.43704	3.59506	1125	>500	4	3
OSTEO	0	0.15893	8.47637	11.5491	7.31087	0	1.32443	0	1.90718	12.2907	0.07946	0.06357	0	0.31786	11.2736	0.95359	0.2119	2.75482	1.48337	1.69527	0.4503	6.99301	7.11662	3.60246	0	1.76591	0.59334	2.64887	7.20492	0.0618	0.03708	0	0.10595	7.81239	1.80123	0.33552	1.68115	1.48337	1573	>500	9	3
OSTEO	0	0.18261	2.19138	18.8093	5.11322	0	2.13051	0	2.55661	3.89579	0.4261	0.14609	2.38617	0	16.0214	0	0	6.59849	5.4541	0	0.03043	1.78557	10.7337	3.28707	0	0.81162	0	2.43487	5.35671	0.17246	0.07913	1.70441	0	10.5673	0	0	5.12134	1.2499	1369	>500	2	3
OSTEO	0.73583	1.10375	7.35835	18.4572	1.83959	0	2.75938	0	6.2546	9.32058	0.45989	0.16556	0	0	6.18102	2.94334	0	2.74712	8.58474	0.24527	0.79715	4.82381	10.9762	1.77827	0	0.81759	0	3.4339	6.37724	0.38835	0.03065	0.45785	0	4.46407	1.47167	0	2.38738	4.12068	1359	>500	8	3
IPB	6.61376	0.16534	1.98413	17.9123	0	0	2.20459	0	0.66137	1.10229	0.68893	0.28108	2.16049	0	11.7284	0	0.49603	1.54321	4.32099	2.42504	0.05511	1.17578	7.47722	0.44091	0	2.29644	0	0.22045	0.66137	0.58788	0.18738	1.13169	0	9.77366	0	0.30313	1.41093	2.05761	1512	>500	2	3
IPB	2.01816	0	16.818	24.3861	16.6499	0	0	0	14.1271	25.5634	0.08409	0	0	1.00908	12.7144	2.5227	0	0.73999	6.59267	3.36361	0	13.2302	18.1635	9.24992	0	0.2803	0	7.39993	18.8362	0.05606	0	0	0.33636	7.53448	0.67272	0	0.17939	5.33692	991	>500	4	3
OSTEO	0	0.36443	1.94363	3.15841	3.64431	0	0	0	1.45773	6.80272	0	0	0	0.72886	5.44218	0	0	0	1.36054	0	0	1.94363	2.02462	3.64431	0	0	0	0.24295	3.23939	0.06073	0	0.45351	0.4859	2.49433	0	0	0	0.90702	686	>500	4	3
OSTEO	0	0	0	5.51232	1.94553	0	0	0	3.89105	1.29702	0	0	0	0	0	0	0	3.63165	3.63165	0.6485	0	0.43233	1.83744	0.32425	0	0	0	0.6485	0	0	0	0	0	0	0	0	0.45395	0.60527	514	>500	4	3
IPB	0	0	10.2041	12.1174	12.1174	0	0	0	10.2041	13.6054	0	0	0	0	2.38095	0	0	1.87075	0	1.70068	0	2.83447	4.81859	6.80272	0	0	0	1.70068	6.80272	0	0	0	0	0.79365	0	0	0.79365	0	392	300-500	19	3
IPB	0	4.70653	12.5508	20.3027	14.9502	0	0	0	11.6279	9.59764	0.09228	0	2.06718	0	0	0	0	2.95312	0	1.10742	2.12255	10.0898	12.8584	10.5205	0	0.61523	0	7.19823	9.59764	0.03076	0.01845	1.37812	0	0.86132	0	0	2.30097	0	903	>500	10	3
OSTEO	0.63734	0.55768	17.8458	9.34778	15.7744	0	0.53112	0	9.56023	28.8931	0.21244	0	0	0	10.7075	0	1.43403	1.99703	2.37943	0.42489	0.63734	10.5517	5.25813	12.269	0	0.17704	0	4.67389	22.2364	0.54882	0.01062	0.19828	0	7.73316	0	0.63734	1.01976	2.18115	1569	>500	9	3
OSTEO	0	1.54202	9.25212	33.8602	7.90285	0	0	0	6.16808	13.8782	0.48188	0.19275	0	0	6.83629	0	0.3855	2.31303	2.51863	0	1.57415	4.71173	15.977	4.49756	0	0	0	4.49756	10.1088	0.16062	0.06425	0	0	6.11668	0.257	0.19275	2.05603	1.67909	1297	>500	8	3
IPB	3.69004	0.69188	14.7601	3.07503	1.38376	0	0.38437	0	3.69004	0	0	0.13837	3.01353	0	1.72202	0	1.49908	5.99631	3.44403	2.15252	0.07687	8.61009	2.5369	1.61439	0	0.38437	0	2.76753	0.205	0	0.17681	2.00902	0.15375	2.72653	0	1.38376	4.5408	2.72653	1084	>500	2	3
OSTEO	0	0	0	2.87356	0	0	14.3678	0	0	0	0	0	0	0	4.02299	0	0	0	0	0	0	0	2.87356	0	0	11.9732	0	0	0	0	0	0	0	0	0	0	0	0	116	<300	2	3
OSTEO	0	3.65311	9.74163	8.41804	5.55909	0	2.11775	0	6.35324	8.47099	0.07941	0.01588	0	0	4.15078	0.31766	0.23824	1.313	0.59296	0.21177	2.19716	5.71792	5.70027	3.65311	0	1.32359	0	5.18848	8.04744	0.03529	0.01058	0	0.15883	2.96485	0.95298	0.76768	1.60949	0.79062	1574	>500	16	3
OSTEO	0	1.59303	4.24809	8.99179	1.91164	0	1.77004	0	7.22175	13.0275	0.1062	0	0	0	9.51572	0	0	9.68564	1.18946	0	1.98244	3.39847	5.52251	0.84961	0	0.70801	0	5.38091	6.98575	0.2124	0	0	0	6.07949	0	0	5.92844	1.32163	1502	>500	4	3
IPB	0	0.87635	8.71043	7.80752	6.53282	0	1.06225	0	4.14277	10.1976	0.15933	0	0	0	0	0	0	1.06225	0.59485	0.42489	1.24814	6.79839	6.92231	4.3021	0	0.17704	0	4.35522	8.21472	0.04426	0.04248	0	0	0	0	0	0.97726	0.09914	1569	>500	4	3
IPB	2.73973	0.11415	3.34855	10.6545	0	0	0.38051	0	0.91324	0	0.57077	0.2968	1.70472	1.82648	2.55708	0	1.0274	0.42617	5.96651	0	0.03805	2.94267	7.45814	0.1522	0	0.12683	0	0.1522	0.81177	0.13952	0.1522	0.85235	1.06545	1.4206	0	0.22831	0.85235	4.11974	1095	>500	9	3
IPB	0	2.12355	6.17761	14.2857	3.861	0	1.9305	0.72072	4.2471	8.23681	0.22522	0	1.44144	0	5.04505	0.7722	1.44788	3.06306	7.20721	0.2574	1.64093	4.1184	7.93651	4.56885	0	0.858	0.48048	3.861	7.89361	0.27885	0.00643	0.84084	0	3.96396	0.7722	0.86872	2.55684	3.96396	1295	>500	9	3
IPB	0.65963	1.31926	10.5541	14.9516	4.61741	0	0	0	9.56464	17.1504	0.05496	0	1.53914	0	8.31135	0	1.92392	4.22164	3.07828	1.09938	0.57717	9.23483	9.0516	3.35312	0	0.54969	0	7.91557	11.8734	0.284	0	0.82087	0	8.927	0.21987	0.86118	2.16945	3.3861	1516	>500	9	3
IPB	0	1.91718	15.8487	13.612	4.98466	0	3.1953	1.43149	4.98466	8.17996	0.38343	0.05751	1.07362	0	16.82	1.53374	0	4.24335	0.71574	0.76687	0.12781	10.0545	11.0983	4.60123	0	0.85207	0.47716	5.11247	5.62372	0.26627	0.0639	0.71574	0	9.78187	1.15031	0	2.35174	0.11929	1304	>500	16	3
OSTEO	0	0	9.70874	19.4175	0	0	4.04531	0	0	0	0.40453	0	4.53074	0	4.53074	0	9.70874	2.589	9.06149	0	0	22.6537	15.1025	0	0	0	0	0	4.31499	0.26968	0.24271	0	0	6.04099	0	0	4.20712	10.5717	103	<300	2	3
IPB	0	1.13225	8.45411	4.52899	8.37862	0	0.75483	0	8.15217	13.285	0.15096	0	1.69082	0.22644	8.87681	4.07609	0	5.73671	6.76329	0	1.13225	9.15862	7.92572	8.45411	0	0.50322	0	8.907	7.24638	0.42773	0.02264	1.83172	0	7.7496	4.52899	0	3.51248	8.0314	1104	>500	19	3
IPB	2.02224	4.80283	15.5039	9.18436	6.5723	0	0.8426	0	12.1335	25.6151	0.08426	0	1.88743	0	8.49343	1.01112	0	1.88743	11.3246	0	2.86485	8.65071	5.72969	2.19077	0	0.28086	0	7.4149	12.8076	0.1966	0	2.202	0	5.66229	1.01112	0	1.88743	6.29143	989	>500	9	3
IPB	0	0.71633	7.64088	9.31232	3.58166	0.9551	4.17861	0	4.29799	0	0.47755	0.10744	0	0	8.02292	0	0	0.33428	0	0	0.59694	2.70614	5.49188	2.86533	0.63673	1.79083	0	1.91022	1.27348	0.37806	0.02387	0.22285	0	4.68004	0	0	0	3.56574	698	>500	9	3
IPB	5.89005	0.49083	8.94415	20.3425	3.9267	0	0.81806	0	3.9267	7.8534	0.21815	0.06544	0.91623	0	4.27574	0.65445	1.09075	7.78796	1.83246	4.363	0.59991	4.29029	13.9616	3.16318	0	0.27268	0	2.83595	4.32664	0.22723	0.05453	0.61082	0	2.54508	0.65445	0.4363	5.09017	4.37755	1528	>500	2	3
OSTEO	5.11509	2.07801	1.4919	12.7344	3.99616	0	1.06564	0	0.63938	5.54135	0.02664	0.03196	1.19352	0	3.58056	0	9.80392	2.38704	0	0.42625	1.09228	1.56294	8.45411	2.18457	0	0.53282	0	0.63938	5.25718	0.07104	0.02664	0	0.05328	1.59136	0.95907	1.52742	2.28758	0.9946	1564	>500	16	3
IPB	3.23102	0.80775	18.3091	8.27948	5.45234	0	1.68282	0.7539	12.9241	17.2321	0.26925	0.06058	1.50781	0	10.7431	0	0	6.03123	4.52342	2.15401	0.67312	12.8343	5.18309	4.30802	0	0.78531	1.00521	5.11578	10.2316	0.49362	0.03365	3.39257	0	7.16209	0	0.359	3.39257	3.01562	1238	>500	9	3
IPB	5.28634	1.43172	0	3.15712	0	0	0	0	0	1.17474	0.88105	0	1.64464	0	14.8018	0	0	1.05727	2.46696	0.58737	0.73421	0.19579	2.83896	0.29368	0	0	0	0	0.39158	0.02447	0	0.82232	0.44052	7.40088	0	0	0.11747	1.37053	1135	>500	9	3
IPB	0	0.78194	8.93655	10.0536	3.35121	0	0.37235	0	5.36193	25.6181	0.03723	0	0	0	7.5067	0	0	0.7745	1.66816	1.19154	0.26064	6.55347	6.28041	2.82991	0	0	0	2.23414	13.1069	0.06205	0	0	0.14894	5.42151	0	0.1117	0.31774	2.22421	1119	>500	9	3
OSTEO	0	1.32275	8.37743	31.9665	14.2196	0	2.20459	0	7.93651	7.93651	0.05511	0	0.61728	0	4.93827	0	0	21.6049	0	0	1.54321	10.435	21.9724	13.1173	0	2.20459	0	6.17284	5.29101	0	0	0.41152	0	6.79012	0	0	16.7695	0	756	>500	19	3
OSTEO	0	0	0	3.56506	0	0	0	0	8.02139	0	0	0	0	0	0	0	0	2.49554	0	0	0	0	1.78253	0.89126	0	0	0	2.6738	1.18835	0	0	0	0	0	0	0	0.83184	0	374	300-500	16	3
OSTEO	2.76243	1.03591	7.36648	8.28729	10.5318	0	0.28775	0.64456	5.87017	16.8048	0.08632	0.15538	1.61142	0.3453	9.02394	0.6906	0.08632	1.01289	11.2799	1.61142	1.43877	2.60896	5.39058	6.56077	0	0.38367	0.96685	4.48895	11.0497	0.09591	0.04604	0.42971	0.1151	6.87538	0	0.23979	0.76734	3.75998	1448	>500	9	3
IPB	0	0.43327	4.04391	4.04391	0	0	1.08319	0	0.86655	8.08781	0.21663	0.04332	0.40439	0	3.63951	2.59965	0.21663	4.39053	3.23512	0.5777	0	3.75505	2.38302	0	0	1.20354	0	0.14442	5.77701	0.16849	0	0	0	4.85269	1.1554	0	3.54323	2.15675	1154	>500	2	3
OSTEO	0	0	0	11.1857	0	0	0	0	0	0	0	0	6.26398	0	0	0	0	0	6.26398	0	0	1.49142	5.21999	0	0	0	0	0	2.98285	0	0	0	0	0	0	0	0	8.35198	149	<300	8	3
IPB	2.28833	2.43135	0	10.9649	0	0	0.95347	0	0	0	0.23836	0	0	0	2.13577	0	0	0	4.27155	0	1.14416	0.12712	7.11925	0	0	0.31782	0	0	0	0.5244	0	0	0	1.60183	0	0	0	3.55962	874	>500	9	3
IPB	0	1.34892	9.29257	10.2668	4.4964	0	0	0	8.09353	9.89209	0.03747	0.08992	0.41966	0	11.3309	1.34892	0.59952	5.03597	2.51799	0.59952	2.17326	6.19504	6.69464	3.82194	0	0.2498	0	5.69544	7.29416	0.04996	0.08243	1.81855	0.44964	9.09273	2.54796	0	2.81775	0.83932	1112	>500	9	3
IPB	0	0.16139	3.87347	3.44308	2.58231	0	2.9589	0	1.29116	4.51904	0	0.03227	0.60253	0	0	0	0	0	0	0	0.40348	4.01693	5.34395	2.15193	0	2.15193	0	2.25952	3.37135	0	0.04303	0.60253	0	0	2.58231	0	0.61688	0.10042	1549	>500	16	3
OSTEO	1.75747	0.87873	9.66608	0.73227	3.07557	0	0	0	2.6362	11.7165	0.10984	0	0	0	8.20152	0	0	6.73697	2.46046	0.87873	0.87873	9.08026	1.70865	3.51494	0	0	0	1.61101	5.32123	0.04881	0	0.54676	0.29291	6.28783	0	0	5.24312	2.05038	1138	>500	9	3
OSTEO	3.34448	0.2787	5.94575	1.76514	2.50836	0	0.92902	0	3.34448	15.6076	0.0929	0	2.08101	0	9.36455	0	0	0.29728	3.64177	1.11483	0.1858	4.83092	1.73418	2.41546	0	0.77418	0	2.60126	11.8915	0.03096	0	0.86708	0	5.8962	0	0	0.33444	1.38734	897	>500	9	3
OSTEO	1.97044	1.23153	5.25452	6.65025	4.18719	2.62726	0	0	3.44828	7.22496	0.12315	0	0	0.49261	3.21839	1.47783	0	4.56486	1.83908	2.95567	0.53366	4.48823	5.82923	3.61248	2.62726	0	0	3.28407	3.50301	0.09578	0	0.15325	0.4105	1.53257	0.98522	0	4.71812	0.91954	1015	>500	19	3
OSTEO	0.77339	1.25677	5.15597	3.35138	1.93349	0	0.96674	0.72183	0	2.06239	0	0.03866	0	0	11.1884	0.77339	0	0	1.44367	0.77339	0.74117	3.26545	3.09358	1.54679	0	0.75191	0	0.77339	1.37492	0	0.03866	0	0	7.69958	0.25779	0	0	0.96244	1293	>500	16	3
OSTEO	0	0.88538	6.22451	5.09766	2.2537	0	0.53659	0	2.57566	16.3125	0.34878	0	1.50247	0	2.40395	0	1.04636	1.43808	2.40395	0.42927	0.4561	3.64885	4.16756	1.44881	0	0.08943	0	1.07319	8.15626	0.13414	0	0.80131	0	2.00329	0	0.36667	1.7028	2.20362	1553	>500	19	3
IPB	0	0.71551	10.4942	10.1126	6.86892	0	1.43102	0	3.14825	10.8758	0.35775	0.04293	0.53424	0	6.94524	0.85861	0	3.2055	1.86987	0.5724	0.2862	7.75933	6.58271	4.24537	0	1.27202	0	3.52986	5.27889	0.32595	0.00954	0.26712	0	3.29454	0.66781	0.318	2.31508	1.51371	1747	>500	16	3
OSTEO	0	0.91996	16.2527	21.2358	15.1794	0	0	0	4.59982	7.35971	0.26832	0	0	0	3.43453	1.83993	0	8.249	0	1.22662	1.18829	14.2083	11.8062	12.8795	0	0.38331	0	4.75314	6.03087	0.03833	0	0	0	3.14832	1.99325	0.38331	6.05131	0.42931	1087	>500	19	3
IPB	2.6738	3.92714	11.5864	18.3823	8.02139	0	0	0	7.35294	18.7166	0.52918	0.03342	1.87166	0	14.0374	0.66844	0.44563	14.5499	8.11052	3.11943	1.78253	11.0665	17.2683	7.63146	0	0.55704	0	8.91266	16.4884	0.44563	0	2.39156	0	10.1901	1.44831	0	10.7398	8.63042	1496	>500	9	3
OSTEO	2.71186	1.69492	7.68362	9.49153	6.94915	0	3.9548	0	3.05085	11.2994	0.14124	0	0.31638	0	10.4407	0	2.06215	1.26554	0.94915	2.48588	1.07345	5.80038	6.53484	4.0678	0	1.50659	0	1.9209	6.47834	0.12241	0	0.10546	0.11299	8.7533	0	0.65913	1.73258	0	1475	>500	9	3
IPB	0	0	0	0	0	0	0	0	0	0	0	0	0	0	0	0	0	0	0	0	0	0	0	0	0	0	0	0	0	0	0	0	0	0	0	0	0	0	1177	>500	2	3
OSTEO	0	3.34896	12.0563	9.82362	8.3724	0	0	0.62513	4.68855	16.7448	0	0	0	0	1.87542	5.02344	0	2.18799	2.50056	0.66979	1.84193	10.9399	8.3538	7.36772	0	0.27908	0.83351	3.90712	11.1632	0.04651	0.03348	0.31256	0	3.33408	1.89775	0.08372	1.0419	1.45866	1493	>500	16	3
IPB	0	2.66904	25.8007	12.3072	20.0178	0	0.74139	0	11.121	32.0285	0	0	0	0	6.64294	0.44483	0.88967	3.32147	0	0	2.37248	20.0672	8.55081	12.0848	0	0.12356	0	5.63464	17.3982	0.07413	0	0	0	3.04468	0.88967	1.68051	1.52234	0.13839	1124	>500	9	3
OSTEO	0	4.31034	11.4942	24.9042	0	0	4.78927	0	0	15.3257	0	0.28735	10.728	0	0	0	0	0.76628	0	0	0.95785	5.10856	11.6539	0	0	0	0	12.4521	10.2171	0	0	25.0319	0	0.89399	0	0	0.76628	0	174	<300	8	3
OSTEO	1.27632	1.43586	21.9102	13.3482	6.7007	0	0	0	10.8488	17.4431	0	0.09572	0	1.27632	12.508	0.31908	0	2.78664	1.19124	1.27632	1.35609	11.7706	6.64752	6.11572	0	0	0	8.61519	10.7779	0.07977	0.07445	0.39707	0.31908	8.73573	0.85088	0	1.68049	2.18393	1567	>500	16	3
OSTEO	1.27065	0.79415	5.71792	20.8598	3.17662	0	0	0	2.5413	4.23549	0.15883	0	0	0	2.66836	1.58831	1.27065	9.52986	8.59805	0	0.21177	3.10603	11.8594	2.0648	0	0.52943	0	0.74121	2.68248	0.27354	0	0.59296	0	0.79062	0.74121	0.56473	4.58139	3.65664	1574	>500	19	3
OSTEO	0	0.63653	0	14.9586	0	0	0	0	0	0	0.10608	0	0	0	3.56461	0	0	0	2.37641	0	0.15913	0.14145	9.67183	0.10608	0	0	0	0	0	0.15913	0	0	0	3.26756	0	0	0.02829	2.27739	1571	>500	19	3
OSTEO	0	6.57895	10.5263	0	18.4211	0	0	0	5.26316	8.77193	0	0	0	0	17.193	2.63158	0	0	2.45614	0	1.31579	5.84795	0.87719	9.64912	0	0	0	7.01754	6.43275	0	0	0	0	14.7368	7.01754	0	0	0	190	<300	9	3
OSTEO	0.64977	1.21832	17.7604	13.5911	12.9954	0	0.54147	0	9.4217	25.7743	0.08122	0.03248	1.81936	0.97465	8.49036	1.29955	0.43318	2.72904	6.06454	0.21659	0.83928	12.8511	9.90903	7.25579	0	0.18049	0	7.1475	16.2443	0.10829	0.03248	0.20215	0.32488	9.50112	0.86636	0	2.19479	3.84088	1539	>500	9	3
IPB	2.21239	0.36873	9.3412	11.1849	3.31858	0	2.76549	0.68829	12.5369	13.766	0	0.07374	0	0	6.88299	0	0.49164	2.7532	3.44149	0.73746	0.55309	7.12881	8.46034	2.82694	0	2.35578	0.91773	6.63717	9.50508	0.18436	0.04916	0	0	4.12979	0.86037	0.16388	3.35955	2.52376	1356	>500	16	3
IPB	4.96689	1.65563	4.41501	6.48455	7.45033	0	0	0	9.93377	1.10375	0	0	0	0	13.1347	0.82781	0	6.62252	2.31788	1.93157	0.96578	4.04709	6.39257	4.69095	0	0.91979	0	9.51987	2.39146	0.02299	0	0	0	9.01398	1.7936	0	3.78035	1.54525	1208	>500	16	3
IPB	5.5336	1.28458	18.9723	19.6311	8.69565	0	0.32938	0	2.7668	5.66535	0.03293	0	0	0.79051	10.3294	2.7668	0	1.63373	4.79578	3.95257	0.9552	14.4049	12.0553	6.12648	0	0.54896	0	2.50329	4.74308	0.13175	0.00658	0	0.527	5.77953	2.7668	0	1.03645	2.45938	1265	>500	8	3
OSTEO	6.004	2.2515	0.66711	8.89482	0	0	2.2237	0.31131	0	0.88948	0.05559	0.10006	0.31131	0	8.4056	0	0	0	5.29242	5.11452	1.05626	0.44474	6.98614	0.22237	0	1.57512	0.20754	0	0.59298	0.12045	0.02779	1.34905	0	6.84901	0.44474	0	0.15565	3.63205	1499	>500	8	3
OSTEO	2.54453	1.11323	13.1467	9.17091	1.27226	0	0.53011	2.37489	6.99746	6.36132	2.09394	0.28625	0	0	5.04665	1.9084	0.31806	6.82782	6.82782	1.9084	0.79516	9.25926	5.97258	0.95419	0	0	1.18745	5.19508	4.52361	1.09556	0.14843	0.89058	0	4.35397	2.75657	0.05301	3.216	4.05711	1572	>500	9	3
OSTEO	0.65573	1.47541	7.86885	5.08197	8.36066	0	0	0	4.91803	12.2404	0.02732	0	0	0	1.22404	0.65573	0	3.14754	1.83607	0	1.01093	5.53734	4.64481	6.28415	0	0.09107	0	3.71585	8.59745	0.05464	0.00546	0	0	10.5064	0.54644	0	1.91621	0.61202	1525	>500	10	3
OSTEO	0	0.52521	3.15126	5.07703	3.67647	0	0.43767	0	0	0	0	0.15756	0	0	11.2745	0	0	1.96078	0.98039	0	0.21883	1.86741	4.05579	1.57563	0	0.29178	0	0	2.10084	0	0.12254	0	0	5.39216	0	0	0.65359	0.98039	952	>500	2	3
IPB	4.77707	0	8.49257	19.3737	6.36943	0	0	0	10.3503	4.24628	0	0	0	0	1.4862	0	0	4.83015	0	0	0	4.24628	11.3234	3.5828	0	0	0	9.02335	2.477	0.02211	0	0	0	4.4586	0	0	3.78627	0	628	>500	16	3
OSTEO	1.62338	1.42045	9.74026	13.5281	7.91396	0	0.6764	0	1.62338	7.57576	0.47348	0	0	0	10.9848	0	0	6.54762	4.54545	1.89394	1.55574	4.87013	8.43254	5.07305	0	0.11273	0	0.81168	5.05051	0.36075	0	0	0	7.07071	0	0	3.52633	1.64141	1232	>500	9	3
OSTEO	1.51286	2.08018	0	15.0025	0.94553	0	0.63035	0	1.89107	0	0.09455	0	0	0.37821	2.118	0.75642	0	0	1.412	2.01715	0.94553	0.08404	9.39233	0.37821	0	0	0	0.12607	0.84047	0.02101	0	0	0	0.82366	0	0	0	0.23533	1322	>500	10	3
OSTEO	0	0.18037	0	5.05051	0.7215	0	0	0	1.443	0.962	0	0	0	0.7215	6.73401	0	1.26263	0	0	0.962	0.36075	0.16033	4.72984	0	0	0	0	0.2405	0	0.04008	0	0	0.481	4.26487	0	1.924	0	0.44893	693	>500	10	3
IPB	0	0.31826	9.33588	5.19839	8.27498	0	0	0	4.77403	14.4282	0.39783	0.09548	0.5941	0.63653	3.56461	0.63653	0	3.39487	4.75281	1.27307	0.05304	6.36537	3.90763	5.72884	0	0	0	2.33397	11.1748	0.07956	0.07956	1.38624	0.68958	2.17837	0.63653	0.07956	1.07504	3.56461	1571	>500	9	3
OSTEO	0	3.25182	0	10.9261	0	0	0	0	0	0	0.21678	0	0	0	4.85605	0	0	0	0.97121	0.34686	1.51752	0	8.46919	0	0	0	0	0.34686	0.92496	0.20233	0.01734	0	0	3.56111	0.17343	0	0	0.97121	961	>500	10	3
IPB	0	0.93283	0.31094	16.4024	2.33209	0	0.77736	0	1.39925	1.86567	0.31094	0.02332	3.91791	0	11.3184	1.39925	0.62189	3.82463	6.09453	0.62189	1.47699	0.62189	10.2612	1.08831	0	1.29561	0	1.55473	2.69486	0.10364	0	3.48259	0.15547	5.5141	1.7102	0	2.19735	1.8864	1072	>500	9	3
OSTEO	0	0.50761	6.76819	6.51438	7.1066	0	3.38409	0	1.01523	13.5364	0	0	0	0	9.47547	0	1.01523	3.45178	3.79019	0	0.3384	3.7225	4.34292	3.21489	0	3.5251	0	2.53807	8.57304	0.1128	0	0.31584	0	6.31698	0	1.12803	1.98534	3.79019	985	>500	9	3
IPB	0	0.93867	7.0922	28.6817	10.6383	0	0	0	5.63204	19.1907	0.20859	0	0	0	2.33625	0	0.31289	2.92032	2.33625	0.83437	0.62578	5.9797	17.8696	6.04923	0	0	0	3.75469	12.5852	0.5041	0	0	0	3.50438	0	0.79961	1.36281	3.50438	799	>500	9	3
IPB	4.45931	1.95095	5.94575	7.80379	3.34448	0	2.32256	0	1.11483	11.8915	0.1858	0	1.04051	0	11.9658	0	0	3.49313	11.4456	4.45931	1.39353	5.20253	3.06577	2.04385	0	0.30967	0	1.85805	7.18444	0.12386	0	0	0.1858	6.9367	0	0	2.06862	7.97721	897	>500	9	3
OSTEO	0	0.22441	6.58288	4.63794	8.30341	0	1.12208	0	4.48833	9.5751	0.0374	0	0	0	0	0	0	1.13704	0.83782	0	0	0	0	0.14961	0	0	0	0	0	0	0	0	0	0	0	0	0.03989	0	1114	>500	19	3
IPB	2.90487	0.72621	14.7664	5.74921	6.53595	0	0	0	3.99419	10.6512	0.78673	0.03631	0	0.72621	3.38901	0	0	3.72791	0.6778	1.93658	0.66569	5.72904	3.36884	2.54176	0	0.20172	0	1.93658	5.80973	0.20172	0.06051	0	0.30259	0.45186	0	0	1.93658	0.45186	1377	>500	9	3
OSTEO	1.26823	0.79264	18.8121	19.7633	6.97527	0	0	0	11.7311	7.60938	0.1321	0.0317	0.88776	0	2.66328	0	1.26823	2.36736	0.59184	0.42274	0.7398	11.9073	10.1811	5.07292	0	0	0	6.34115	4.79109	0.2554	0	0.88776	0	1.4796	0.10568	0.63411	1.18368	0.19728	1577	>500	10	3
OSTEO	0	2.31054	7.08564	20.5638	3.69686	0	2.69563	0	4.62107	3.69686	0.07701	0.06931	0	0	5.1756	0.92421	0.23105	1.35551	7.3321	0	0.84719	5.85336	13.8632	1.23229	0	1.79708	0	4.46704	2.87533	0.47494	0.04621	0	0	4.88807	0.61614	0.41076	1.15013	5.46313	1082	>500	9	3
IPB	5.58659	0.46554	4.96586	15.8287	3.25885	0	0	0	3.72439	7.75916	1.24146	0.02327	1.73805	0.46554	4.77964	0	1.8622	0.43451	9.12477	4.96586	0.34916	1.44838	8.69025	0.77591	0	0.77591	0	1.08628	4.24167	0.69832	0	3.18643	0.23277	5.35899	0	0.31036	0.43451	3.91061	1074	>500	9	3
IPB	0	0	8.62069	4.66954	4.31034	0	0	0	4.31034	0	0.71839	0	0	0	12.069	0	0	3.01724	0	0	0.35919	10.5364	6.70498	3.95115	0	0	0	8.62069	0	0.11973	0	0	0	10.728	0.71839	0	0	0	232	<300	9	3
OSTEO	0	2.2482	25.7794	2.39808	20.6835	0	0	0	21.5827	46.7626	0	0	3.35731	0	11.7506	3.59712	0	2.63789	8.39329	0	0.67446	15.9872	2.9976	14.0887	0	0	0	5.9952	25.9792	0	0	1.67866	0	8.39329	1.79856	0	2.63789	6.15508	556	>500	9	3
IPB	0	0	9.10125	4.62173	13.8652	0	0	1.59272	6.82594	23.0375	0.1422	0.21331	4.37998	0	13.1399	0	1.70648	4.77816	3.9818	0	0	6.44672	3.10485	9.38567	0	0.1185	0.79635	4.40842	18.7713	0.17775	0.06399	2.25635	0	5.9727	0	1.39837	3.18544	1.9909	1172	>500	4	3
OSTEO	1.90235	1.42676	16.2756	11.3084	7.1338	0	2.90636	0	2.53646	9.93447	0	0.15852	0.59184	0.63411	2.66328	0	0	3.80469	0	0.84548	0.95117	11.6255	6.07694	5.81272	0	1.67336	0	3.27626	5.56612	0.07926	0.07926	0	0.21137	1.77552	0	0	4.31198	0.19728	1577	>500	16	3
OSTEO	0	1.78872	6.17284	25.6032	2.94613	0	0	0	7.99663	7.85634	0	0.04208	0.78563	0.42087	7.07071	0	0	5.16274	3.14254	0.56116	0.28058	3.55406	19.4772	2.52525	0.37411	0	0	6.59371	6.73401	0.02338	0.04208	1.04751	0.14029	7.85634	0.28058	0	3.88141	1.70221	1188	>500	8	3
OSTEO	0	0.57781	6.16333	6.74114	7.51156	0	0.96302	0	0.77041	6.16333	0.0642	0.0963	0.71905	0	11.8644	0	0.0963	0	6.47149	0	0.70621	2.65366	7.04075	3.14587	0	0.53501	0	1.02722	1.88324	0.1177	0.02568	1.55795	0	8.02945	0	0.0856	0	4.67386	1298	>500	9	3
IPB	0	0	0	0	0	0	0	0	0	0	0	0	0	0	0	0	0	0	0	3.02801	1.32475	0.08411	8.41114	0	0	3.04904	0.23551	0	0	0.03154	0.01892	0.47102	0.31541	1.76634	0	0.50466	0	1.64858	1321	>500	2	3
OSTEO	1.37552	0.17193	0	1.49014	0.68775	0	0.85969	0	0	4.12655	0.2579	0.13755	0	0	9.94956	0	0.4585	0	2.56763	0.22925	0.02865	0.15283	1.06985	0.22925	0	0.95521	0	0	1.22268	0.2579	0.05731	0	0	7.16797	0.68775	0.07641	0.10698	3.10255	1454	>500	19	3
IPB	0	4.91803	15.3005	19.9454	5.32787	0	0	0	13.1148	16.3934	0.81967	0.32786	6.12022	0.81967	0.76502	1.63934	0	9.61749	1.53005	0	2.2541	14.7541	10.2004	2.86885	0	2.27687	0	4.37158	8.37887	0	0.20491	1.78506	0.81967	0.51001	0	0	5.13661	1.02004	610	>500	9	3
OSTEO	0	0	2.12314	6.15711	0	0	0	0	0	3.39703	0.31847	0.35031	0	0	7.13376	1.27389	0.84925	2.08068	5.35032	0	0	0.56617	2.93701	0	0	0.17692	0	0.84925	3.68011	0.08846	0.19108	0.59447	0	5.9448	1.27389	0.42462	0.19815	0	785	>500	2	3
OSTEO	3.12989	0	4.17319	15.3886	0	0	0	0	4.69484	4.17319	0	0.07824	0	0	0	0	0	0	0	3.12989	0	3.82542	9.73744	0	0	0.86941	0	1.82577	2.43436	0	0.07824	0	0	1.46062	0	0	0	0	639	>500	16	3
IPB	0	0.79617	15.0743	3.29087	11.465	0	1.06157	0	4.77707	11.0403	0.05307	0	0.59447	0	4.4586	0	0	4.01274	1.18896	0.21231	0.69002	10.1203	3.78627	7.21868	0	0	0	2.9724	4.10474	0.03538	0	0.19815	0	3.76504	0	0	2.08068	1.78344	1570	>500	9	3
OSTEO	0	0	2.47372	10.5133	4.63822	0	0	0	5.56586	8.03958	0	0	3.4632	0	0	0	0	0.49474	5.19481	0.61842	0.30921	3.50443	8.81262	0.61842	0	1.54607	0	4.329	3.50443	0.20614	0.03092	1.1544	0	0.5772	0	0	0.08245	2.886	539	>500	9	3
IPB	0	1.36426	7.95816	8.75398	10.7435	0	1.13688	0	6.13915	14.0973	0.14211	0.08526	0	0.51159	8.27649	0	0.45475	1.11414	5.72988	0	0.76739	5.91178	6.61285	6.08231	0	0.18948	0	3.41064	7.5792	0.03789	0	0.1061	0.28422	5.83599	0.68212	0.30316	0.84887	5.09322	1466	>500	9	3
IPB	0	1.2987	0.2886	9.66811	2.5974	0	0.36075	0	0	0	0.07215	0.08658	0.80808	0	3.23232	0.4329	1.7316	4.84848	0	0	1.26263	1.1544	13.3478	2.81385	0	0.60125	0	0	0.3848	0.13227	0.0505	0.26936	0	2.96296	0	0.03607	3.09764	0.6734	1155	>500	16	3
OSTEO	0	0.31685	5.91466	10.8788	7.60456	0	0	0	6.33714	6.75961	0	0	1.18293	0	22.4757	0	0	1.85889	13.0122	2.11238	0.52809	5.06971	5.14012	5.91466	0	0	0	2.53485	5.63301	0	0.08449	0.39431	0	15.7724	0	0	1.15477	7.4919	789	>500	8	3
IPB	0	0.54704	5.83516	2.91758	3.28228	0	0	0	0	5.83516	0	0	0	0	2.0423	0	0	0	2.0423	0	0.54704	1.94505	1.45879	3.28228	0	0	0	1.45879	1.94505	0.36469	0	0.68076	0	0.68076	0.72939	0	0	0	457	300-500	9	3
IPB	0	0	24.9221	4.6729	2.33645	0	3.89408	0	7.00935	12.4611	0	0	8.72274	0	10.9034	0	0	2.18069	6.54206	0	0.3894	11.4226	2.85566	1.94704	0	1.62253	0	2.33645	5.71132	0.1947	0	2.90758	0	11.6303	1.94704	0	0.72689	4.36137	428	300-500	9	3
IPB	0	0	11.2994	0	0	0	0	0	16.9491	0	1.41243	1.69492	0	0	0	0	0	0	15.8192	0	0	3.76648	3.76648	0	0	0	0	0	0	0	0	0	0	0	0	0	0	2.63653	59	<300	8	3
IPB	4.18994	1.74581	0.93109	21.1243	0.8729	0	0.58193	0.65176	0.34916	0.93109	0	0.19203	2.28119	0	7.82123	0	0.69832	0.16294	12.3836	3.02607	2.03678	1.31906	13.4427	2.03678	0	0.58193	0.65176	0.46554	4.34513	0.10668	0.08147	1.30354	0	4.01924	1.28026	0	0.18621	6.62632	1432	>500	9	3
OSTEO	0	1.32714	9.28998	10.783	5.97213	0	0	0	1.99071	12.829	0.05529	0	0	0	10.219	0	0	6.37027	6.81265	0.44238	1.16125	5.97213	8.31306	3.98142	0	0	0	1.65893	6.04586	0.10137	0	0	0	6.19332	0.22119	0	3.31785	3.71599	1507	>500	9	3
OSTEO	4.14651	1.98687	12.4395	17.3347	12.4395	0	0.5759	0	4.49205	11.9788	0.28795	0	0.3225	0	1.29003	1.03663	0	8.68463	3.87008	2.30362	1.15181	9.36804	13.6489	7.37157	0	0	0	3.22506	7.8323	0.16317	0	0.64501	0.23036	1.29003	1.61253	0	5.69761	3.87008	1447	>500	19	3
IPB	0	0	6.71463	8.27338	2.8777	0	0	0	5.7554	5.7554	0.35971	0.28776	0	0	8.05755	0	0	1.34293	0	0	0	5.59552	4.55635	1.67866	0	0.19984	0	2.8777	2.55795	0.03996	0.07194	0	0	4.02878	0	0	1.56675	0	695	>500	16	3
OSTEO	1.35044	0.3376	4.05132	8.1589	4.05132	0	0	0	1.35044	8.32771	0.45014	0.05064	1.57551	0	7.24736	0	0	3.55616	2.83592	0.90029	0.28134	4.50146	5.66434	1.80059	0	0.18756	0	1.35044	5.32673	0.17818	0.03376	0.84027	0	8.08763	0	0.05626	3.32358	1.68055	1481	>500	9	3
OSTEO	3.16706	1.88044	1.31961	3.69491	1.97941	0	1.31961	0	0	0	0.09897	0.09897	1.47796	0	29.1898	1.58353	0.92372	0.36949	4.80338	1.05569	1.51755	0.96771	1.71549	1.51755	0.17594	0.54983	0	0	0	0.20893	0.05938	1.23164	0	18.2282	0.79176	0.54983	0.43107	1.97062	1263	>500	9	3
OSTEO	4.46429	1.86012	17.8571	9.11458	6.69643	0	0	1.38889	2.97619	11.9048	0.43402	0	0	0	2.08333	0	0	1.04167	4.51389	2.48016	1.17808	12.7315	6.88244	4.46429	0	0.10333	0.69444	1.73611	4.79497	0.43402	0	0.23148	0	1.85185	0.24801	0	1.15741	3.93519	1344	>500	9	3
IPB	1.92308	0.32051	5.98291	18.6432	10.5769	0.42735	1.86966	0	9.29487	18.3761	0.08012	0.1923	2.09402	0	14.6581	4.80769	0	3.88889	1.79487	1.7094	0.69444	4.77208	11.5029	5.55556	0.2849	1.33547	0	6.83761	13.9601	0.13354	0.17094	3.68946	0	10.5698	3.63248	0.21367	2.47863	0.99715	1560	>500	16	3
OSTEO	2.97915	1.11718	11.5856	35.0877	8.19265	0	1.65508	0	4.46872	5.95829	0	0	0	0.99304	0.46342	0.99304	0	0.72823	0	2.97915	0.86891	9.93049	20.7161	7.69613	0	1.51716	0	5.29626	5.73761	0.01379	0	0.15447	0	0	0.99304	0	0.46342	0	1007	>500	10	3
IPB	1.29702	0.97276	10.5923	22.3195	13.2944	0	0	0	8.10636	15.0238	0.02702	0	1.81582	0	6.96066	0	0	4.10722	0	0.86467	0.45936	7.71004	17.1495	10.4842	0	0.36028	0	7.24168	9.97982	0.07205	0	2.01758	0	4.94308	0	0	3.53077	0.30263	1542	>500	4	3
OSTEO	0	0	4.82218	10.6992	6.32911	0	0	0	5.42495	2.41109	0	0	0	0	11.8143	0	0	0	5.06329	0.60277	0	3.41571	9.6946	3.61664	0	0.25115	0	3.01386	4.42033	0.1758	0.03013	0	0	4.5007	0	0	0	1.68776	553	>500	8	3
IPB	2.60926	0.65231	11.9591	17.232	5.21853	0	2.71798	0	8.15395	17.83	0	0	0.60882	0.32615	5.47945	0	0	2.08741	0	0.86975	0.86975	7.75531	8.80626	3.3703	0	0.63419	0	8.37139	10.0022	0.07247	0.01087	0.60882	0.38051	4.66768	0	0.16307	1.58005	0	1533	>500	16	3
IPB	1.43575	1.25628	12.2039	21.8952	10.7681	0	0.89734	0	0.71787	15.3147	0	0.03589	2.68007	0	18.7605	2.8715	0	4.83369	4.69012	1.19646	0.71787	10.0503	14.9557	6.34123	0	0.49852	0	0.95716	9.93061	0.13958	0	2.45673	0	12.2836	2.03398	0	2.83959	4.24344	1393	>500	8	3
OSTEO	4.6225	1.44453	5.90652	28.3128	4.6225	0	0	0	4.23729	8.21777	0.1605	0	0	0	1.07858	13.0971	0	5.72676	3.9548	2.31125	0.70621	3.68088	18.0834	2.56805	0	0	0	4.7509	8.60298	0.0535	0.03852	2.51669	0	1.31827	7.31895	0	2.49101	1.79764	1298	>500	8	3
OSTEO	0	0	0	0	0	0	0	0	0	0	0	0	0	0	0	0	0	0	0	0	0	9.25926	4.62963	0	0	0	0	0	0	0	0	0	0	0	0	0	6.48148	0	24	<300	8	3
IPB	2.68817	1.34409	10.3047	14.4489	8.06452	0	1.12007	3.1362	6.72043	19.7133	0.112	0.20161	1.25448	1.34409	10.6631	0	0	11.2903	7.52688	0.44802	0.22401	5.52569	7.57915	3.69624	0	0.37335	0.83632	4.03226	11.0514	0.03733	0.1344	2.50896	0.44802	7.10872	0	0	5.43608	5.43608	744	>500	9	3
IPB	1.5361	0.38402	7.68049	17.8571	12.6728	0.51203	0	0	12.2888	9.21659	0.128	0.0576	1.43369	0	25.8065	0	0	5.99078	2.86738	0.51203	0.19201	4.77897	9.92063	8.76856	0.17067	0.96006	0	4.35228	8.19252	0.10667	0.064	0.95579	0	19.4743	0	0	3.34528	2.50896	1302	>500	8	3
OSTEO	0	0	25.3268	13.8208	2.45098	0	1.02124	0	4.49346	2.85948	0.20424	0	0	0	3.05011	0	11.0294	5.39216	3.43137	0	0.54466	15.5229	9.71314	1.77015	0	0	0	2.58715	4.53885	0.04538	0.07489	1.52505	0	2.79593	0.13616	11.4606	3.39506	1.77923	1224	>500	8	3
IPB	0	1.32042	15.2582	8.80282	8.80282	0	0	0	3.52113	4.69484	0.14671	0	0	0	11.5023	0	0	9.2723	1.64319	0	1.17371	9.97653	5.77074	7.62911	0	0	0	2.34742	7.82473	0.0489	0	0	0	6.02504	0	0	7.82473	0	568	>500	8	3
OSTEO	0	0	7.93651	12.7551	5.38549	0	0	0	2.26757	1.51172	0.56689	0.02834	0	0	3.7037	0	2.26757	0.5291	1.0582	0	0	4.7871	7.55858	4.2517	0	0.15747	0	3.59033	6.04686	0.39367	0.11337	0.35273	0	3.7037	0	2.51953	0.35273	2.46914	882	>500	4	3
IPB	0	1.75285	14.8992	14.2419	2.84838	0	0.73035	0	4.38212	9.34852	0.03651	0.17528	0	0	10.2249	0.87642	0	3.38884	9.81595	0.29214	1.2416	8.08258	9.17811	2.70231	0	0.12172	0	3.94391	7.59568	0.03651	0.18258	0	0	5.18064	0.58428	0	3.18434	8.99796	1141	>500	8	3
IPB	0	1.02987	1.37315	10.2128	0	0	2.57467	0	2.05973	7.55235	0.17164	0	0.9612	0	18.7436	0	0	0.68657	0	1.71644	0.51493	1.37315	7.09463	0.34328	0	0.57214	0	0.68657	3.20403	0	0	0.6408	0	9.13148	0	0	0.41194	0	971	>500	16	3
IPB	2.54453	0.53011	7.91631	14.4897	7.2095	0	0	0	4.24088	9.04722	0.31806	0.59372	0	0	15.8326	0.84817	0	7.2095	5.93723	0.56545	0.03534	4.33512	10.4608	3.46339	0	0	0	2.82725	4.52361	0.1767	0.27565	0	0	6.06917	0.84817	0	5.10791	2.11102	1179	>500	8	3
IPB	0	0.31746	6.34921	16.2434	10.1587	0	0.5291	0	0.63492	13.9682	0.13227	0.06349	2.37037	0	5.33333	0	0	2.07407	4.14815	0	0.15873	5.50265	12.2046	6.2963	0	0	0	1.16402	6.4903	0.08818	0.01058	0.98765	0	5.92593	0	0	1.48148	3.45679	1575	>500	8	3
OSTEO	1.72117	0.43029	6.31096	16.9248	3.01205	0	0	0	7.74527	12.6219	0.07171	0.04302	0	0	0	0	0	3.09811	0	5.73723	0	6.69344	13.7694	5.88067	0	0.9562	0	5.16351	6.5022	0.14343	0.07171	0	0.14343	2.67738	0	0	6.08147	0	581	>500	16	3
OSTEO	3.9604	1.9802	3.9604	2.69527	0	1.76018	0.55005	0.61606	0	2.64026	0	0	0.61606	0	5.23652	1.32013	0	3.69637	1.84818	2.20022	1.0176	4.76714	1.68684	0.55005	0.58672	0.27502	0.61606	0	2.05354	0.03667	0.088	0.20535	0	4.72314	0	0	3.83572	1.95086	1515	>500	8	3
OSTEO	2.76498	4.03226	3.0722	19.4316	0.92165	0.61443	1.5361	0	0.92165	8.60215	0.0768	0.09216	0	0	18.4946	0	0.23041	2.7957	6.88172	4.91551	2.41935	4.30108	15.233	0.99846	0.81925	1.40809	0	1.99693	6.34921	0.19201	0.12288	0	0.1536	15.4839	0	0.1536	2.00717	3.15412	1085	>500	8	3
IPB	0	0	0	15.1007	0	0	0	0	0	0	0	0	0	0	0	0	0	0	0	0	0	0	2.98285	2.23714	0	0	0	0	0	0	0	0	0	0	0	0	2.08799	0	149	<300	16	3
OSTEO	0	0	0	3.9548	0	0	2.54237	0.63276	0	2.25989	0.05649	0	0	0	1.89831	1.35593	0.67796	0	0	0.45197	0	0	2.10923	0	0	0.4708	0.63276	0.11299	1.12994	0.06591	0	0	0	2.42561	0.67796	0	0	0.94915	1475	>500	9	3
IPB	0.68587	0.94307	9.83082	20.2904	4.11523	0	0.28577	0	1.37174	18.7471	0.02857	0.08573	2.56059	0	14.4033	0	0	6.3786	7.04161	0.91449	1.08596	5.41076	14.289	3.31504	0	0.38103	0	2.40055	8.80201	0.11431	0.01143	1.49367	0	7.89514	0.22862	0.0762	3.5208	5.65463	1458	>500	8	3
OSTEO	0	0	0.70372	6.27492	1.75932	0	0	0	0.70372	1.40746	0	0	0	0	9.1954	0.35186	0	2.62726	4.92611	0	0	0.15638	4.16373	1.58339	0	0	0	0.11728	0	0.05864	0	0	0	5.03558	0.58644	0.46915	0.65681	3.72195	1421	>500	2	3
IPB	1.58856	1.38999	1.05904	3.17712	5.55997	0	0	0	4.36855	17.4742	0.13238	0	0	0	10.7493	0.79428	0.19857	2.17104	4.07731	0.52952	0.72809	1.3238	2.44903	5.22902	0	0.11031	0	1.9857	9.88439	0.25372	0	0	0	6.54841	0.92666	0.13238	1.48266	3.33598	1259	>500	9	3
IPB	0	0.33422	5.64468	9.43256	5.79323	0	0.37136	0	2.22816	7.7243	0.22281	0	0.41592	0	8.31848	0	0	4.39691	2.91147	0.29708	0.14854	5.24856	7.551	3.04516	0	0.49514	0	0.89126	3.56506	0.03713	0.01485	0.83184	0	7.34799	0	0	1.42602	2.63418	1122	>500	9	3
OSTEO	2.24888	1.87406	12.7436	17.8661	16.6792	0	0	0	2.9985	10.4947	0.12493	0.07496	0.69965	0	15.0425	0	0.49975	5.1974	3.49825	0	0.68715	8.57904	10.3282	8.49575	0	0.7288	0	1.49925	7.03815	0.10411	0.07496	1.3993	0	9.67849	0	0.24987	4.54773	4.89755	1334	>500	2	3
OSTEO	2.9985	1.49925	10.9945	10.4947	2.24888	0	0	1.3993	9.74513	7.996	0	0.11244	2.7986	0	6.64668	1.49925	0	5.94703	11.8941	1.999	1.12444	12.3272	6.16358	1.62419	0	0.41645	1.16608	11.2444	3.998	0.06246	0.02498	1.16608	0.24987	2.09895	7.74613	0	3.03182	7.22972	667	>500	8	3
OSTEO	0	1.05422	8.83534	18.0723	10.5422	0	0	0	6.0241	8.43373	0.2008	0.06024	1.68675	0	4.49799	0	0	0.64257	1.1245	0	0.502	7.09505	12.7845	6.72691	0	0.33467	0	4.01606	7.02811	0.33467	0	2.249	0	3.56091	0	0	0.69611	1.1245	830	>500	8	3
OSTEO	0	4.13793	3.44828	9.94253	1.72414	0	0	0	0	4.13793	0.57471	0.13793	0	0	12.2299	0	0	4.82759	2.57471	0	2.12644	1.99234	6.37931	0.57471	0	0.47892	0	0.45977	0.99616	0.21072	0.06321	0.53639	0	6.00766	0	0.31609	3.21839	1.6092	1450	>500	2	3
IPB	2.12766	1.19681	20.922	6.91489	10.6383	0	0.88652	0	6.38298	17.0213	0.26595	0.50531	0.9929	0	1.98582	1.59574	0	4.46809	5.95745	1.77305	0.88652	9.21986	4.31442	6.56028	0	0.59101	0	4.96454	15.8392	0.1773	0.22163	1.65485	0	0.9929	2.48227	0.32505	4.04255	6.95035	940	>500	9	3
IPB	0	0	0	0	0	0	0	0	0	0	0	0	0	0	0	0	0	0	0	0	0	0	0	0	0	0	0	0	0	0	0	0	0	0	0	0	0	0	258	<300	2	3
OSTEO	3.82653	2.0727	0	8.55655	0.31887	0	0	2.38095	0.31887	0.42517	0.6909	0.30293	0.59523	0	1.78571	0	0	0	1.19048	0.85034	1.59439	0	5.93467	0	0	0.08857	0.59523	0.10629	0	0.44288	0.1116	0.69444	0	1.5873	0.10629	0.28344	0	0.89285	1568	>500	9	3
OSTEO	0	0.07961	6.58174	5.46709	11.465	0.21231	0.79617	0	6.36943	35.0318	0.02653	0.14331	1.18896	0.31847	3.86412	0	0	11.0191	1.78344	0.21231	0.02653	4.52937	1.53928	7.48408	0.28308	1.85775	0	4.24628	16.5251	0.01769	0.138	0.39631	0.21231	2.87332	0	0	7.21161	0.99079	1570	>500	9	3
OSTEO	0	5.47445	8.68961	6.43031	9.90615	0	0	0	7.29927	4.17101	0.08689	0	0	0	0	1.04275	0	1.11227	0	0.69516	2.82412	6.6041	10.1958	2.43309	0	0.5793	0	5.90893	5.56135	0.08689	0	0.64882	0	0	0.17379	0.08689	0.48661	0	959	>500	16	3
OSTEO	0	0	32.7869	19.1257	0	0	0	0	0	0	0	0	0	0	0	0	0	0	0	0	0	10.929	11.3843	0	0	0	0	13.6612	3.64299	0	0	0	0	0	0	0	0	0	61	<300	10	3
OSTEO	0	0.7161	7.21409	10.5029	5.72884	0	0.79567	0	2.54615	6.78973	0.13261	0.17504	2.37641	0	2.97051	0	0	2.97051	2.97051	1.69743	0.05304	4.31431	6.719	2.97051	0	0.0884	0	1.69743	3.67777	0.14145	0.11139	2.07935	0	1.98034	0	0.14145	1.7328	1.7823	1571	>500	4	3
IPB	0	1.02145	4.0858	18.8968	4.85189	0	3.40483	0	5.10725	2.38338	0.04256	0.02553	1.90671	0	3.33674	0	0	0.27238	5.24345	0	0.8512	2.1564	12.9951	4.93701	0	1.41868	0	4.42629	4.48303	0.26954	0.01702	1.58892	0	3.17785	0	0	0.20429	5.24345	979	>500	9	3
OSTEO	1.91327	1.11607	21.6837	11.5327	13.074	0	2.39158	0	7.65306	14.2432	0.07971	0	0	0	3.86905	0	0.07971	4.37925	1.19048	0.63775	0.85034	14.2432	7.59991	10.6293	0	1.86012	0	6.48384	17.5737	0.07086	0.01594	0.59523	0	1.78571	0	0.3543	3.30215	1.19048	1568	>500	16	3
OSTEO	0	0.82128	15.7687	16.6448	8.86991	0	1.64258	0	6.5703	19.2729	1.1498	0	0.61322	0.32851	19.3167	0	0	4.18309	2.75953	0	0.5749	11.3885	11.4615	6.18703	0	2.64637	0	4.16119	13.8706	0.73915	0	0	0.05475	11.3447	0.43802	0.41976	2.91283	0.81763	1522	>500	9	3
IPB	0	0	0	4.06504	0	0	0	0	0	0	0	0	0	1.52439	0	0	0	0	0	0	0.50813	2.37127	3.72629	1.52439	0	0	0	2.03252	2.71003	0.08468	0	0.9485	0	1.89702	0	0	0	0	328	300-500	10	3
OSTEO	1.77936	1.77936	10.3796	5.1898	7.11744	0	1.8535	0	2.2242	19.5729	0.18534	0.04448	1.66074	0	5.81257	0	0	2.19454	1.66074	0.88967	0.88967	4.94267	2.2242	4.30012	0	1.4828	0	2.52076	13.6912	0.27184	0.02965	0.96876	0	2.90629	0	0.1977	1.24555	0.55357	1124	>500	9	3
OSTEO	9.18274	4.82094	10.7132	10.4836	4.59137	0	0	0	4.59137	9.79492	0	0.02295	0.85705	0.45913	1.71411	0.91827	0	1.28558	0	3.367	2.52525	5.10152	7.14213	2.14264	0	1.14784	0	4.89746	9.99898	0.11478	0.0153	0.57137	0	1.9998	0.76522	0.07652	0.85705	0.71421	1089	>500	16	3
OSTEO	0	2.14558	20.7671	8.68828	5.40369	0	2.91375	0	8.58233	22.0386	0.05297	0	0.59334	0	2.37338	0.63572	0	1.78004	3.56008	1.05955	0.90061	11.3725	6.6928	2.86078	0	1.23614	0	4.662	9.18274	0.01765	0.01059	0.39556	0	1.18669	0.63572	0	1.48337	1.97782	1573	>500	16	3
OSTEO	4.57666	0	3.81388	27.8413	6.29291	0	0	0	10.2975	4.57666	0.19069	0	0	0	9.61098	0	0	2.66972	8.5431	0.76277	0.38138	6.73786	14.6835	3.43249	0	0	0	5.72082	4.57666	0.15891	0.03813	0	0	6.76329	0	0	2.39003	6.76329	874	>500	19	3
IPB	11.9761	6.73653	11.9761	0	0	0	0	0	0	0	0.2495	0	0	0	0	8.98204	0	13.5729	5.58882	0	4.24152	11.9761	5.32269	1.99601	0	0	0	3.99202	14.6374	0.2495	0	0.93147	0	0	5.98802	0	9.44777	0	167	<300	9	3
IPB	0	2.37643	2.85171	11.5653	2.37643	0	0	1.3308	6.65399	8.23828	0.07921	0.14258	0	0.47528	1.7744	1.90114	0	1.5526	3.9924	0.63371	1.02978	2.218	7.52535	1.90114	0	0.26404	0.73933	3.48542	3.80228	0.10561	0.03168	0	0.63371	0.88719	1.42586	0.63371	0.92944	2.80946	1052	>500	9	3
IPB	0	0	0	0	0	0	0	0	0	0	0	0	0	0	0	0	0	0	16.4319	0	0	0	0	0	0	0	0	0	1.56495	0	0	0	0	0	0	0	0	0	142	<300	4	3
OSTEO	0	4.67798	18.5669	5.43951	13.49	0	0	0	6.52742	16.246	0.2901	0	0	0	8.12301	0	1.37801	15.5497	5.6861	2.03075	2.79228	11.6043	2.8769	12.257	0	0	0	3.48129	13.5383	0.24175	0.0145	0	0	7.03994	0	0.96702	9.94101	4.73842	1149	>500	19	3
OSTEO	1.95185	0	10.4099	9.27131	8.13273	0	0.27109	0	5.53025	17.892	0.43374	0.01626	0	0.48796	13.663	0.65061	0.3253	4.4242	4.55433	1.08436	0	6.00014	4.80734	5.3676	0	0.18072	0	3.36153	12.1449	0.09036	0.01084	0.20241	0.48796	9.51348	0.21687	0.05421	2.58801	3.94708	1537	>500	9	3
OSTEO	0	0.32873	0	0.65746	0	0	0	0	0	0	0	0	0	0	0	0	0	0	0	0	0.16436	0	0.2922	0	0	0	0	0	0	0	0	0	0	0	0	0.13697	0	0	1521	>500	16	3
IPB	0	3.68852	15.3005	26.2295	18.0328	0	0	0	8.19672	8.74317	0	0.08196	0	0	21.4208	6.55738	1.63934	5.02732	32.1311	0	1.0929	16.3934	12.9326	12.5683	0	0	0	18.5792	16.7577	0.95628	0	3.06011	0	10.2004	8.19672	0	6.7031	9.69035	305	300-500	19	3
OSTEO	0.65402	0.49051	11.1184	10.5734	4.74166	0	1.09004	0	2.61609	9.15631	0.109	0	0	0.1635	11.2928	2.28908	0	5.73359	4.88337	0.65402	0.73577	9.15631	6.34038	3.92413	0	0.2725	0	2.18007	6.28588	0.13625	0	0	0.0545	7.93547	1.74406	0.02725	4.09127	3.15384	1529	>500	9	3
IPB	0	1.9084	7.63359	38.274	9.54198	0	0	0	2.54453	6.78541	0	0.19083	0	0	7.12468	0	0	5.64037	3.56234	0.84817	0.53011	5.23042	14.9845	4.24088	0	0	0	1.27226	3.10998	0	0	0	0	1.97908	0	0	3.36443	0.39581	786	>500	8	3
OSTEO	9.14634	1.52439	6.09756	7.11382	4.57317	0	1.27033	0	0.76219	3.04878	0.38109	0	0	0	8.53659	0	3.04878	2.13415	4.26829	3.04878	1.14329	6.09756	7.9607	6.60569	0	5.50474	0	4.57317	12.8726	0.1482	0	0	0	7.11382	0	1.01626	5.25068	4.26829	656	>500	19	3
IPB	0	0.41631	2.77546	4.02442	0.83263	0	0.69386	1.55426	1.24896	1.11019	0	0.08326	0.77713	0	9.32556	0	0.83263	0.38856	1.55426	1.38773	0.13877	3.42307	3.74688	0.55509	0	0.57822	0.77713	0.69386	4.07068	0.01156	0.06938	1.1657	0	4.53326	0	0.27754	0.77713	1.1657	1201	>500	9	3
IPB	0	1.42857	11.1111	17.3016	13.5714	0	0.79365	0	4.28571	15.2381	0.11904	0.04761	0	2.61905	15.5556	0	0	3.71429	5.33333	0	0.79365	8.35979	7.67196	7.77778	0	0.39682	0	5.71429	8.46561	0.07936	0.04761	0.29629	1.74603	9.92593	0	0	1.89418	4.14815	1050	>500	19	3
IPB	0	1.48613	6.60502	16.9529	8.25627	0	0.55041	0.61646	3.30251	8.80669	0	0.1321	0	0	9.8635	0	0.08256	4.64553	0	0	0.77058	4.84368	7.21048	4.67856	0	0	0.20548	4.29326	6.89858	0	0.15411	0	0	6.37017	0	0	3.30985	0.61646	1514	>500	2	3
IPB	8.98411	2.07326	11.5181	11.9788	4.8376	0	0	0	3.10988	10.1359	0.02879	0	0.96751	0.69108	13.2228	1.03663	0	12.6238	3.22506	2.53398	0.5759	6.68049	10.3471	2.93711	0.15357	0.38393	0	3.57061	6.29655	0.07678	0	0.3225	0.34554	9.35268	0.69108	0	8.50802	2.79505	1447	>500	8	3
IPB	0	0.81486	3.47675	6.68188	6.68188	0	0.54324	0.60843	6.5189	8.03998	0.02716	0.01629	0	0	11.5602	2.60756	0	1.21686	11.5602	0	0.32594	3.47675	4.40026	3.74837	0	0.54324	0.60843	6.08431	4.78053	0.03621	0	0.81124	0	7.09836	0.86918	0	0.81124	8.41663	1534	>500	4	3
OSTEO	0	0.51405	11.4233	25.3598	3.0843	0	0	0	4.45511	6.39708	0.02855	0	0.31985	0	0	0	0	6.44277	1.59927	0	0.62828	10.3572	19.4959	2.3989	0	0.47597	0	5.48321	4.41703	0.00951	0.00571	0.10661	0	0.53308	0	0	3.77732	1.27942	1459	>500	16	3
OSTEO	3.62976	1.58802	4.23472	10.0575	0.22686	0	0	1.69389	0.90744	3.62976	0.03781	0	0	0	9.31639	0	0	2.02662	0.42347	3.0248	1.85269	1.31075	5.46985	0.7562	0	0.25206	0.84694	2.2686	3.22646	0.05041	0.00756	0	0	6.91672	0	0.30248	0.9881	1.12926	1102	>500	9	3
OSTEO	3.44828	0.21551	1.14943	21.5517	0	0	5.74713	0	0.86206	0	0.21551	0.0431	0	0	6.43678	0	0	0.80459	0	0	0	0.57471	15.5651	0.86206	0	2.87356	0	0.86206	0.38314	0	0.01436	0	0	6.97318	0	0	0	0	580	>500	16	3
OSTEO	6.04686	2.26757	3.27538	8.56639	1.51172	0	0	0	0.37792	0	0.03149	0	0	0	2.82187	1.51172	0	3.57773	2.1164	1.76367	1.5747	1.84765	4.2412	1.00781	0	0.41992	0	0	0.33593	0.12597	0.01259	0	0	1.76367	0	0	1.93164	0.35273	1323	>500	8	3
IPB	0	0.97024	1.29366	1.88659	2.26391	0	1.07805	0	1.29366	7.76197	0.0539	0	0	0	1.50927	0	0.1617	0.34497	0	1.94049	1.50927	6.61205	8.4627	5.01294	0	1.25773	0.6037	5.60586	15.8114	0.13475	0	0	0	5.23214	0.53902	0.1617	3.51445	0.6037	1546	>500	19	3
OSTEO	4.47857	1.91939	25.8051	10.9298	13.5956	0.21326	0	0	9.91683	14.9286	0.07997	0.07997	0	0.63979	15.2271	0	0.42653	3.71081	7.46428	2.55918	0.71976	16.7058	5.93588	8.10407	0	0.17772	0.19904	7.99744	6.25578	0.21326	0.02132	0.19904	0.74642	13.7343	0	0	1.91228	5.57333	1563	>500	9	3
IPB	0	0	18.7437	6.83891	1.51976	0	0	0	3.03951	0	0	0.15197	0	0	0	0	3.03951	7.90274	0	0	0	13.8467	3.46167	1.51976	0	0	0.94562	2.78622	0.8443	0.06332	0	1.65485	0	0.47281	1.01317	0.75987	4.86322	0	658	>500	2	3
IPB	0	0.31908	5.53074	22.8675	8.29611	0	0	0	2.55265	14.8904	0	0	0.89342	0	1.19124	0	0.7977	2.59519	0.89342	0.85088	0.18613	4.96348	9.69652	4.36077	0	0.35453	0.19853	2.55265	9.64334	0.01772	0	0.39707	0	1.09197	0	0	0.99978	1.19124	1567	>500	4	3
IPB	4.9505	0.92821	2.47525	3.30033	7.42574	0	0	0	1.85644	6.60066	0.10313	0	0	0	0.57755	0	0	0	1.15512	0.82508	0.97978	1.92519	2.37211	4.22855	0	0	0.86633	4.53795	7.70077	0.01718	0	0.38503	0	0.77007	0.20627	0	0.71507	0.38503	808	>500	4	3
IPB	1.93424	3.78788	13.5396	14.2381	10.3159	0	0.80593	0	1.93424	6.01762	0.05372	0.06447	0	0.32237	10.8317	0.64474	1.28949	9.92908	5.11498	0.85966	1.66559	10.1727	10.6562	8.75779	0	0.62683	0	1.71932	3.43864	0.08954	0.04835	0.90264	0.10745	7.12085	1.07458	0.50146	5.96748	4.11204	1551	>500	2	3
IPB	0	0.25201	0.33602	4.36828	0	0	0.84005	0	0	1.34409	0.126	0.0252	0	0.50403	1.41129	1.00806	0	0	1.88172	0	0.16801	0.33602	3.1082	0	0	0.14	0	0.50403	0.44802	0.126	0.0588	0.47043	0.25201	3.44982	1.17608	0	0.0448	1.5681	992	>500	8	3
OSTEO	5.81879	1.4547	13.8543	11.7761	13.7157	0	0	0	1.66251	15.5168	0.1039	0.20781	0	0	17.8443	0	0	12.9122	3.10335	2.21668	1.17761	8.31255	7.57366	7.75838	0	0.80816	0	2.07814	11.1758	0.20781	0.12468	0.25861	0	10.7324	0.55417	0.64653	7.6106	3.36197	1203	>500	8	3
OSTEO	3.81679	0.79516	6.99746	5.19508	8.26972	0	0	0	1.9084	8.05768	0.84817	0	0	0.31806	2.67176	0	0.15903	2.03562	3.56234	1.69635	0.90118	3.88748	4.15253	4.77099	0	0	0	0.42408	5.93723	0.30039	0	0	0	2.32542	0	0.26505	1.83772	3.46339	1572	>500	19	3
IPB	1.95567	1.30378	3.25945	17.601	3.91134	1.73837	1.35811	0	1.95567	5.21512	0.05432	0.45632	4.25902	0	13.9939	1.95567	0.08148	6.12777	8.82225	0.86918	0.70621	4.05621	9.74214	2.93351	0.43459	1.44865	0	1.19513	1.23135	0.17202	0.46718	2.94075	0	8.21382	3.47675	0.10864	3.02043	5.07026	1534	>500	2	3
IPB	9.9108	2.60159	6.27684	4.1295	8.91972	0	0.8259	0	0	5.94648	0.04129	0.84241	1.85002	0	16.1876	0	0	17.1126	0	1.32144	0.99108	4.51492	3.13842	3.71655	0	0.5506	0	0.49554	3.52384	0.17894	0.52031	0.925	0	10.1751	0.16518	0	7.44411	0	1009	>500	2	3
IPB	0	0	2.59909	3.41131	1.46199	0	0	0	1.94932	0	0	0	0	0	5.45809	0	0	0	0	0	0.16244	1.29955	1.73273	1.29955	0	0	0	0.64977	1.73273	0.02707	0	0	0	1.81936	0.64977	0	0.08663	0.60645	513	>500	16	3
OSTEO	0	0.89285	5.35714	13.6161	2.23214	0	0	0	2.67857	3.57143	0.0744	0	0	0	5.41667	0	0	0.41666	1.66667	0.29761	1.11607	3.96825	7.36607	2.67857	0	0.24801	0	1.78571	1.19048	0.062	0.02976	0	0	5.13889	0	0.26041	0	0.83333	1120	>500	9	3
OSTEO	0	1.95313	0.91911	5.20833	0	0	0.38296	0	0	0.61274	0.11488	0	0	0	6.0049	0	0.61274	0.12254	2.14461	0	1.18719	0.81699	4.08497	0.61274	0	0.63827	0	0	0	0.11488	0.00765	0	0	4.57516	0	0.15318	0	0.57189	1088	>500	19	3
OSTEO	4.85437	2.79126	8.09061	10.4369	5.09709	0	0.80906	0	1.94175	8.41424	0.16181	0.14563	0	0	10.8738	0	0.97087	4.49838	2.26537	0	0.6877	7.55124	7.47033	3.15534	0	0.40453	0	0.97087	3.99137	0.06742	0.12944	0.30204	0	3.6246	0	0	3.08522	1.96332	1030	>500	8	3
IPB	0	0.63451	1.69205	15.0169	2.53807	0	3.70135	2.36887	1.26904	2.53807	0.15862	0	0	0.95177	11.8443	1.26904	0	4.44162	2.36887	1.69205	0.74027	3.38409	8.46024	2.32657	0	0.52876	0.78962	0	2.82008	0.05287	0.01057	0	0.42301	4.34292	0.84602	0	0	1.97406	788	>500	9	3
OSTEO	0	0.38109	6.09756	6.22459	4.19207	0	0	0	1.52439	4.82724	0.69867	0	0	0	2.84553	3.04878	0	1.42276	2.84553	0	0.57164	5.25068	5.42005	4.57317	0	0.21172	0	1.01626	7.11382	0.19054	0.0254	0	0	2.37127	0	0.25406	2.81165	1.42276	656	>500	8	3
IPB	5.06009	0.94876	6.32511	6.06156	2.53004	0	1.58128	0	3.47881	4.0059	0.23719	0.31625	0	0	8.85515	0	0	7.16846	4.42758	4.42758	0.31625	4.14646	4.98981	2.16108	0	0.87848	0	2.31921	1.6867	0.13177	0.16339	0	0	7.67447	0	0	6.08616	3.64045	1581	>500	8	3
IPB	1.26984	1.90476	4.02116	20.6878	2.06349	0	0.5291	0	0.63492	5.92593	0.37037	0.01587	3.55556	0	18.963	0	0	2.62434	4.74074	1.26984	1.40212	2.75132	11.6049	0.95238	0	0.17636	0	2.85714	7.40741	0.15873	0.04232	1.08642	0	9.08642	0	0	1.45326	4.54321	1575	>500	2	3
OSTEO	0	0	7.61484	9.45714	1.47384	0	0.30704	0	6.63228	4.42152	0.0614	0.07369	0	0	9.97298	0	0	1.42471	12.3803	0	0	7.7786	7.41014	1.47384	0	0.30704	0	2.94768	8.67928	0.08187	0.02456	0	0	7.10718	0	0	1.01531	9.62908	1357	>500	4	3
OSTEO	0	0	6.15006	11.6851	5.53506	0	0	0	7.38007	4.92005	0	0	0	0	0	0	0	5.41205	0	0	0	9.02009	7.89258	3.07503	0	0	0	2.46002	5.74006	0.205	0	0	0.615	1.72202	0	0	2.70603	2.29602	271	<300	19	3
IPB	0	1.98588	9.41453	14.6367	6.17829	0	0	0	8.38482	11.7682	0.07355	0	0.82377	0	9.88526	0	0.22065	3.70697	9.88526	0.2942	0.80906	5.88408	8.33579	4.04531	0	0.24517	0.27459	4.56016	6.86476	0.07355	0	1.09836	0	7.13935	0	0	1.64754	7.68854	1133	>500	19	3
OSTEO	0	0	0	0	0	0	0	0	0	0	0	0	0	0	0	0	0	0	0	0.84709	0.90004	0.91769	8.62982	0.15883	0	0.35295	0	0.42354	1.41183	0.26471	0.01058	1.38359	0	3.06367	1.27065	0.14118	0.50825	0.19765	1574	>500	16	3
OSTEO	0	1.25	9	25.4167	11.5	0	0	0	4	6.66667	0.08333	0.05	2.8	0	1.86667	0	0.66666	9.33333	0	0.66666	1.79167	7.22222	20.6667	9.5	0	1.11111	0	5.5	10	0.125	0.05833	4.82222	0	1.86667	0.83333	0.33333	9.48889	1.86667	1000	>500	19	3
IPB	1.85529	2.55102	14.2239	16.1565	9.74026	0	2.31911	1.7316	3.71058	16.6976	0.38651	0.13914	0.8658	0.92764	7.35931	2.78293	0	3.58689	4.329	3.09215	1.85529	11.9563	8.11688	6.3389	0	1.54607	1.1544	6.18429	9.07029	0.41228	0.03865	0.7215	0.46382	6.06061	2.62832	0	2.1645	3.1746	1078	>500	9	3
OSTEO	0	0	60.6061	30.303	0	0	0	0	0	0	0	0	0	0	0	0	0	0	0	0	7.57576	20.202	10.101	0	0	0	0	0	0	0	1.51515	0	0	0	0	0	12.1212	0	11	<300	16	3
OSTEO	1.91083	0.55732	19.7452	6.21019	14.172	0	0	0	15.9236	28.4501	0.10615	0.01592	0	0	4.4586	0	0.15923	7.00637	2.67516	0.42462	0.37154	13.1635	4.4586	6.90021	0	0.26539	0	8.70488	18.719	0.23885	0.02653	0.09907	0	4.4586	0	0.07961	4.45152	1.18896	1570	>500	9	3
OSTEO	0.63734	0.47801	9.13533	23.5819	17.2084	0	0	0.29742	10.1976	19.9703	0.239	0	0.29742	0.15933	5.65116	0	0	1.95454	2.37943	0	0.21244	2.90348	9.27696	6.90461	0	0.61964	0	6.37349	8.49798	0.14163	0	0.19828	0	2.37943	0.10622	0.17704	0.79314	1.09057	1569	>500	16	3
IPB	1.07411	0	5.72861	0	2.68528	0	0	0	3.22234	7.16076	0	0.0537	0	0.53705	7.5188	4.83351	0	5.51378	1.50376	0	0.17901	3.93842	1.70068	2.14823	0	0	0	1.79019	2.38692	0.13426	0.0537	0.50125	0.17901	3.84294	2.68528	0	5.02447	5.51378	931	>500	4	3
OSTEO	0	2.46234	17.3812	53.3024	11.2978	1.545	4.34531	0	4.05562	7.72499	0.2414	0	0	0	5.40749	1.15875	0.57937	7.57049	2.163	0	1.7864	9.91374	34.5371	6.95249	1.8025	1.60937	0	2.89687	9.01249	0.09656	0	0	0	3.06425	2.3175	0.19312	4.59637	2.5235	863	>500	19	3
OSTEO	0	0	0	6.21415	0	0	0	0	0	0	0.13278	0	0	0	2.97429	0	1.11536	4.92883	1.78458	0.42489	0.02655	0	4.53226	0.05311	0	0	0	0	0.14163	0.16818	0.01062	0	0	2.97429	0	0.10622	3.45585	2.57772	1569	>500	19	3
OSTEO	0	0.6402	7.46906	18.0324	4.96159	0	1.60051	0	0	2.56082	1.44046	0	1.49381	0	2.09134	0.6402	0	2.98762	1.19505	0.8536	0.2134	6.18865	9.51416	3.89458	0	0.71133	0	0.7469	3.84123	0.71133	0	0.39834	0	1.39422	0.6402	0	1.54361	0.99587	1562	>500	4	3
OSTEO	8.72324	4.46075	14.2744	29.0774	11.1023	0	0	1.48031	11.4988	31.7209	0.46259	0	0	0	15.9133	0	0	6.10626	5.18107	5.28681	2.18081	8.10644	14.4506	5.81549	0	0.22028	0.98687	6.34417	18.8563	0.40752	0	0	0	14.9264	0.26434	0	2.83725	4.44092	1261	>500	9	3
OSTEO	0	0	10.7383	4.02685	5.36913	0	1.11857	0	4.69799	16.1074	0.22371	0	2.50559	0	22.5503	2.68456	0	4.56376	6.26398	0	0	5.81655	3.57942	1.78971	0	3.91499	0	0.44742	6.56227	0.91349	0	0	0	12.9456	1.78971	0	1.75988	5.42878	745	>500	16	3
IPB	0.71736	5.64921	29.89	18.8905	10.043	0	3.8857	0	16.4993	26.3032	0.02989	0.0538	5.35629	1.7934	5.02152	0	0	2.94118	22.0947	0.47824	3.91559	16.579	14.128	7.53228	0	1.29523	0	11.5973	17.3761	0.26901	0.03586	2.23179	0.83692	2.90132	0.11956	0.23912	1.80137	13.5023	1394	>500	9	3
IPB	0	0.85851	11.4469	17.3993	12.0192	0	2.28938	0	5.49451	15.3388	0	0	0	0	9.61538	0	0	1.92308	5.76923	0	0.45787	9.46276	10.9509	11.1035	0	1.71703	0	5.26557	9.61538	0.05723	0	0.21367	0	5.98291	0	0	2.442	4.05983	728	>500	19	3
OSTEO	0	0.83836	9.38967	8.83076	8.04829	0	0.5589	0	8.71898	16.0966	0.44712	0.03353	0	0	1.87793	0	0.16767	2.50391	0.62597	0.89425	0.67069	6.93047	7.73157	3.91236	0	1.21097	0	4.24771	9.31515	0.1863	0.00558	0.20865	0	1.87793	0.44712	0.70795	1.87793	0.62597	1491	>500	9	3
IPB	0	0	1.33333	8.33333	12.5	0	0	0	10	13.3333	0	0	0	0	3.73333	0	0	6.53333	0	0	0	2.22222	7.66667	8.16667	0	0	0	3.66667	7.11111	0	0	0	0	3.11111	0	0	4.35556	0	500	300-500	19	3
OSTEO	2.04221	1.36147	11.7994	12.2532	5.10551	0	0	0	4.08441	7.715	0.02836	0.03403	0.63535	0	9.53029	0.68073	0	3.086	5.08282	0	0.68073	8.84956	9.37902	4.99206	0	0	0	2.49603	5.29461	0.08509	0.03403	0	0	9.84797	1.58838	0	2.28424	2.7532	1469	>500	4	3
OSTEO	2.54777	2.14968	11.6773	20.0106	4.4586	0	3.45011	0	0	4.24628	0.63694	0.03184	0	0	11.5924	2.54777	0	2.37792	3.86412	2.33546	1.3535	7.57254	13.1458	1.64544	0	2.21161	0	0.31847	2.12314	0.91118	0.02123	0.29723	0	8.9172	1.06157	0.28308	1.7339	2.37792	1570	>500	9	3
IPB	0	0.45829	1.83318	6.5689	0	0	0	0	0	1.22212	0	0	0	0	2.13871	0	3.36083	0.21387	1.71097	1.52765	0.95478	3.7682	5.24493	0.30553	0	0.2546	0	0.61106	2.03687	0	0.03819	0	0	1.71097	0	1.83318	0.57032	1.85355	1091	>500	2	3
OSTEO	0	0.3631	3.87315	14.948	0	0	0	0	2.17865	12.8298	0.12103	0.07262	0.6778	0	10.167	2.17865	0	3.14694	11.5226	0	0.96828	3.06625	4.47833	0	0	0	0	1.81554	7.66562	0.0706	0.08472	3.84088	0	6.43912	1.45243	0.32276	2.22706	8.35956	1377	>500	2	3
OSTEO	9.34579	0	0	18.1724	3.11526	0	2.59605	0	0	0	0	0	0	0	0	0	0	1.45379	0	2.07684	0	0.69228	12.9803	1.03842	0	0	0	0	0	0.1298	0	0	0	0	0	0	0.96919	0.96919	321	300-500	19	3
OSTEO	0	0.56904	9.86343	9.67375	6.44917	0	0.63227	0	10.6221	5.05817	0	0.03793	1.41629	0	5.31108	0	0	4.1477	0	0	0.44258	7.92446	6.42809	3.0349	0	0.21075	0	7.08144	4.38375	0.04215	0	0.47209	0	5.54713	0	0	2.34362	0.70814	1318	>500	16	3
IPB	1.47059	1.19485	2.94118	14.8897	3.125	0	1.83824	0.68627	0	1.47059	0.21446	0.03676	0.68627	0.36764	6.86275	0	0	1.37255	0.68627	0.24509	1.22549	2.53268	8.47631	1.16422	0	1.22549	0.22875	0	0.98039	0.15318	0.01225	0.45751	0.12254	5.37582	0.49019	0	0.70261	1.83007	1360	>500	9	3
IPB	0	0.95419	20.6107	7.6972	14.8855	0	3.81679	0	8.39695	27.9898	0.60432	0	0	0	3.56234	0	0	1.42494	13.5369	0.5089	0.47709	13.1467	5.00424	9.28753	0	1.69635	0.47497	5.59796	17.9813	0.18023	0	0	0	2.73113	0.25445	0	1.30619	8.43087	1310	>500	4	3
IPB	1.27551	2.4713	10.4167	4.67687	4.78316	0	2.12585	0	3.18878	8.82228	0.05314	0	0.59523	0.31887	3.57143	0	0	4.46429	5.95238	0	1.91327	6.59014	3.86196	3.24192	0.28344	0.88577	0	2.76361	7.83022	0.07086	0	0.39682	0	4.86111	0.31887	1.27551	4.06037	2.87698	1568	>500	9	3
OSTEO	2.43902	1.82927	18.1572	14.6341	5.89431	0	4.06504	0	13.4146	16.9377	0.20325	0	0	0	2.27642	0	1.08401	4.93225	2.27642	1.35501	2.10027	6.95574	8.73984	2.98103	0	2.59711	0	7.85908	6.14273	0	0	0	0	2.78229	0	0.72267	2.972	1.51762	1230	>500	9	3
OSTEO	2.11416	0.26427	2.11416	14.623	0	0	0	0	0	0	0.17618	0.21141	0	0	11.346	0	0.70472	0	21.2121	2.81889	0.52854	0.46981	7.16467	0	0	0	0	0.70472	0	0.0734	0.05285	0	0	6.90627	0	0	0	10.8527	946	>500	9	3
OSTEO	4.03226	3.02419	0.33602	13.5249	0	0	0.84005	0	0	1.34409	0	0.1512	0	0	12.2312	0	0	1.00806	0.94086	2.01613	1.26008	0.44802	7.8125	0	0	0.28001	0	0.16801	1.5681	0.056	0.0336	0	0	7.52688	0	0	0.1008	0.62724	992	>500	8	3
OSTEO	0	0	6.99913	0	0	0	1.09361	0	6.56168	2.18723	0	0	0	0	0	0	0.65616	3.84952	0	0	0.43744	3.20793	0.21872	0	0	2.18723	0	8.31146	0	0.0729	0	1.22485	0	0	0	0.43744	1.92476	2.44969	381	300-500	2	3
IPB	5.97015	2.23881	0	0	0.74626	0	0	0	2.98507	15.9204	0	0	0	0	0	0	0	0	0	6.96517	1.74129	3.31675	0.99502	0.99502	0	0	0	1.99005	7.9602	0	0	0.92868	0	0	0.99502	0	0	0	335	300-500	9	3
IPB	0.87489	2.62467	0.29163	27.9965	0.21872	0	1.09361	0	0	0	0.21872	0	0	0	12.6568	0	0	0	8.98221	0.29163	1.74978	0	20.1711	0	0	0	0	0.14581	0	0.20657	0.02187	0.13609	0	8.43783	0	0	0	3.81063	1143	>500	9	3
IPB	0	3.77468	11.2273	13.9373	5.8072	0	0	0	5.8072	10.453	0.04839	0.11614	0	0	5.96206	0	0.77429	6.19435	1.08401	0	2.03252	9.80772	9.71093	4.64576	0	1.4518	0	4.25861	7.87198	0.09678	0.06775	0	0	5.05872	0	0.38714	5.40715	1.80668	861	>500	20	4
OSTEO	2.65957	1.24668	4.87589	4.04477	1.32979	0	0	0	3.32447	9.30851	0.22163	0.23271	0	0	9.61879	0	0	0	0.62056	0.44326	0.55407	1.84693	2.69651	0.27703	0.14775	0.18469	0	1.10816	8.27423	0.31397	0.13851	0	0.0554	5.37825	0	0	0.04432	0.62056	1504	>500	14	4
IPB	0	0	0	0	0	0	0	0	0	0	0	0	0	0	0	0	0	0	0	0	0	0	0	0	0	0	0	0	0	0	0	0	0	0	0	0	0	0	816	>500	20	4
OSTEO	0	1.96335	7.56254	26.2507	2.6178	0	5.09017	0	4.7993	3.4904	0	0	0	0	2.03607	0	0	7.88249	0	0.58173	0.4363	4.45996	13.9858	1.52705	0	2.1815	0	2.6178	4.26605	0	0.01454	0	0	1.22164	0	0	6.36998	0.81442	1146	>500	14	4
IPB	0	2.00192	12.5988	10.4634	1.28123	0	3.47	0	3.52338	6.51292	0.24023	0.16015	0.89686	0	10.4634	0	1.17446	7.8155	3.58744	0.21353	1.12108	6.54851	6.83323	2.02861	0	1.95743	0	1.70831	4.37754	0.08007	0.06939	0.49825	0	6.57698	0.10676	0	4.05723	0.7972	1561	>500	20	4
OSTEO	0	2.2293	18.4713	28.9278	7.16561	0	2.38854	0	1.91083	17.4098	0	0.03184	0	0	1.18896	0	0	14.862	2.37792	0	1.59236	11.1819	20.1699	4.67091	0	1.59236	0	0.63694	11.5357	0	0.01061	0	0	1.9816	0	0	9.00212	2.37792	1570	>500	6	4
OSTEO	0	0	7.98557	27.7563	1.5456	0	0.64399	0	6.56878	12.3648	0.12879	0.09659	0	0	2.88511	0	0	3.76095	1.80319	0.17173	0.61179	7.12691	13.5884	0.77279	0	0.64399	0	5.66718	6.86931	0.13953	0.04507	0.60106	0	3.48618	0.38639	0.06439	1.69157	1.92341	1294	>500	20	4
OSTEO	0	0.22104	7.36811	11.6416	2.87356	0	2.57884	0.82522	1.76835	3.83142	0	0.24314	0	0	6.18921	0	0.66312	6.74919	0.82522	0	0	2.94724	8.39965	2.21043	0	1.47362	0.55015	0.58944	5.30504	0.07368	0.13262	0	0	3.43845	0	0.40524	3.12408	0.55015	1131	>500	14	4
OSTEO	3.35196	1.95531	5.95903	15.4562	6.70391	0	1.39665	0	0.55865	9.68343	0	0.05586	3.64991	0	7.29981	0	3.11918	5.28864	0	4.84171	1.76909	4.96586	12.2284	3.16574	0	2.01738	0	0.37243	5.21415	0.0931	0.05586	2.43327	0	7.29981	0	1.14836	4.09683	0.1738	895	>500	18	4
OSTEO	0	1.43495	6.37755	2.65731	0.63775	0	0.79719	0	2.55102	5.31463	0	0.54209	0.29761	0	1.4881	0	0	7.20663	1.4881	0.85034	1.22236	4.53515	3.13563	0.31887	0	0.17715	0	0.74404	4.10998	0	0.27104	0	0	0.79365	0	0	5.1233	0.49603	1568	>500	14	4
OSTEO	1.71969	0	4.01261	19.7048	3.00946	0	2.14961	0	3.00946	5.15907	0	0	0.40126	0	10.4328	0	0	5.21639	1.60504	1.43308	0	2.86615	16.4326	4.29923	0	2.14961	0	0.85984	3.43938	0.03582	0	0.13375	0	6.95519	1.00315	0	4.2419	1.33754	1163	>500	20	4
IPB	0.66093	0.82617	6.8297	10.0242	4.2961	0	0.27539	1.23375	1.98282	10.575	0.05507	0.06609	0	0	8.01939	0	0.88125	7.55673	4.00969	2.20313	0.60586	4.11251	8.28009	1.43203	0	0	0	0.88125	10.1344	0.00917	0.01101	0.8225	0	3.80407	0	0.46816	4.57516	3.90688	1513	>500	6	4
OSTEO	1.28041	1.28041	9.38967	9.12292	5.76184	0	1.06701	0.59752	0	5.54844	0.02667	0.04801	0.59752	0	7.17029	0	1.49381	4.73752	3.58515	0	0.8536	6.61545	2.95206	3.25437	0	0.35566	0.19917	0.8536	6.04638	0.1067	0.11737	0.29876	0	7.22009	0	0.07113	2.50391	2.78845	1562	>500	14	4
OSTEO	0	2.01318	5.85652	14.1532	2.19619	0.48804	2.44021	0	3.66032	5.85652	0	0	0	0	0	0	0	9.85847	0	0.48804	1.03709	4.22971	4.39239	1.70815	0.32536	1.62681	0	0.97608	4.55507	0.16268	0	0	0	0	0	0	6.068	1.59427	683	>500	14	4
IPB	0	0.80593	5.80271	19.9334	0.32237	0	0.53728	0	0.64474	6.44745	0	0.22566	0	0	1.05308	1.28949	0	0	0	0	0.80593	4.44158	11.0681	0.42983	0	0.71638	0	0.85966	4.44158	0.05372	0.10208	0	0	0.60176	0.53728	0	0	0	1551	>500	14	4
IPB	0	1.42045	4.59957	1.08225	2.43506	0	5.07305	0	0.81168	0	0	0.08116	0	0	3.78788	0	1.21753	3.95022	0	0	1.42045	4.96032	2.61544	1.89394	0	6.31313	0.25252	3.24675	0.7215	0.11273	0.32467	0	0	4.54545	0.13528	0.54112	8.53175	2.0202	1232	>500	6	4
IPB	1.60901	3.92196	17.4309	22.5262	1.20676	0	1.00563	1.50174	6.03379	11.9335	0.36873	0.20112	0.75087	0	13.328	0	0	3.37892	6.75784	0.53633	1.2738	6.16787	7.37463	0.40225	0	0.22347	0.50058	2.01126	5.98909	0.12291	0.14749	0.50058	0	5.63154	0	0	1.82355	2.25261	1243	>500	14	4
IPB	0	0.68493	3.65297	13.9269	6.84932	0	0	0	2.73973	0	0	0	0	0	0	0	0	14.6119	7.67123	0	0	2.43531	12.9376	4.10959	0	0	0	0	3.65297	0	0	0	0	0.42617	0	0	8.46271	2.55708	365	300-500	6	4
IPB	0	1.42146	8.52878	7.10732	5.68586	0.47382	2.36911	0	3.55366	5.92277	0	0.21321	0	0	9.95025	0	0	2.98507	6.96517	0	0.94764	5.68586	3.15881	4.61976	0.07897	0.39485	0	1.89529	4.73821	0.05922	0.15399	0	0	8.73411	0	0	1.50043	3.75898	1407	>500	14	4
OSTEO	0	4.54111	15.7213	27.884	3.50542	0	1.06225	0	1.91205	12.4283	0	0.11153	0	0	4.46144	0	0	5.94859	4.75887	0.63734	2.44317	8.92288	16.6065	2.76184	0	1.15077	0	2.54939	10.233	0.08852	0.05311	0.09914	0	0.79314	0	0	3.55499	3.6683	1569	>500	6	4
IPB	2.6455	0.99206	7.49559	18.8492	0.99206	0	2.48016	0	6.94444	16.9753	0.7716	0.06613	0	0	5.55556	0.66137	0.16534	9.10494	3.08642	0.88183	0.5787	4.11523	12.3457	1.15741	0	0.91857	0	3.41711	12.0885	0.09185	0.03306	0	0	6.27572	0.33068	0.3215	6.32716	2.6749	1512	>500	18	4
IPB	0	0.21276	1.70213	13.6879	0.85106	0	2.83688	0	0	5.67376	0.49645	0	1.19149	0	0.79432	0	0.85106	2.38298	7.94326	0.56737	0.3546	2.08038	7.06856	0.14184	0.09456	2.00946	0	0	4.34988	0.47281	0.02836	0.26477	0	1.85343	0	0.85106	1.83452	4.50118	1175	>500	14	4
OSTEO	2.73224	3.84221	12.5228	20.321	3.4153	0	2.84608	0	3.75683	20.0364	0.39845	0.13661	0.31876	0	7.01275	0	0	3.82514	3.18761	3.4153	1.84995	9.63874	12.7884	1.82149	0	1.70765	0	3.18761	11.5361	0.08538	0.01707	0	0	5.63145	0	0	3.18761	2.65634	1464	>500	14	4
IPB	0	1.40728	5.29801	5.96026	4.96689	0	2.20751	0	5.96026	20.5298	0	0.23178	0	0.82781	1.8543	0	0.93818	3.70861	0	0	0.91059	5.88668	4.94849	2.42826	0.22075	1.65563	0	3.97351	11.0375	0.18395	0.12693	0.10301	0.11037	4.22369	0	0.77262	2.36939	0.41206	1510	>500	18	4
IPB	0	1.94099	13.1988	12.0342	3.49379	0	1.94099	0	4.27019	5.30538	0.06469	0.05822	0.72463	0	9.05797	0	0.19409	14.4927	3.26087	0	1.4234	6.03865	5.00345	1.4234	0	2.58799	0	2.19979	3.88199	0.12939	0.07116	0.36231	0	6.88406	0	0.12939	9.02346	2.05314	1288	>500	20	4
OSTEO	3.83142	1.91571	8.08855	29.2678	10.2171	0	0.53214	0	7.66284	15.3257	0.15964	0	0	0	0	0	0	13.708	1.192	5.95998	2.18178	4.96665	18.8378	5.53427	0	0.70952	0	6.17284	12.2038	0.1419	0.05321	0.99333	0	0	0	0	7.60607	1.192	783	>500	20	4
IPB	0	0.6798	16.9952	10.9903	2.71924	0	0.5665	0	0.3399	20.1677	0	0.54384	0	0	8.24836	0.6798	0	2.22071	1.90347	0	0.79311	10.1971	7.45902	1.35962	0	0.37767	0	0.6798	14.5781	0.01888	0.31724	0	0	5.9219	0.3399	0	1.16323	0.95173	1471	>500	6	4
IPB	3.08642	2.70062	7.71605	2.18621	4.82253	1.28601	0.643	0	1.92901	9.51646	0.80375	0.03858	0	0	5.76132	0.7716	0.09645	9.25926	1.08025	0.5144	1.63966	4.62963	1.80041	2.95782	0.5144	1.07167	0	0.7716	5.91564	0.30006	0.01286	0.24005	0	4.32099	1.02881	0	7.04733	1.20027	1296	>500	14	4
IPB	0	1.43021	8.77193	5.53013	1.71625	1.52555	0.95347	0	0	0	0	0.0572	0	0	4.27155	0	0	1.06789	0	0	0.47673	7.37351	4.64022	0.76277	1.39842	0.31782	0	0	2.28833	0	0	0	0	4.62751	0.38138	0.04767	0.22883	1.06789	874	>500	6	4
OSTEO	0	0.32446	3.46096	7.24638	5.84036	0	0	0	0.64892	2.1631	0	0	0	0	6.35951	4.5425	0.43261	8.32793	1.21133	0	0.48669	4.03778	2.52361	4.00173	0	0.81116	0	0.75708	1.94679	0.06309	0.02703	0.60566	0	8.78218	1.62232	0.1442	5.14817	1.31228	1541	>500	14	4
IPB	1.27389	2.78662	11.8896	10.7219	7.64331	0	1.85775	0	4.14013	8.70488	0.21231	0.19108	0.29723	0	17.2399	0	0.84925	12.4204	5.9448	0.42462	1.77813	10.5449	7.05945	5.25478	0	1.41543	0	3.18471	3.75088	0.30077	0.05838	0.39631	0	13.7721	0	0	6.17127	3.56688	1570	>500	14	4
OSTEO	0	0	0	0	0	0	0	0	0	0	0	0	0	0	0	0	0	0	0	0	0	0	0	0	0	0	0	0	0	0	0	0	0	0	0	0	0	0	1100	>500	18	4
IPB	2.5641	1.92308	10.4701	6.89103	0	1.06838	2.93803	0	5.12821	6.83761	0.21367	0.03205	0	0	10.7692	0.96153	0.21367	9.97863	3.88889	1.7094	1.28205	8.26211	3.52564	0	0.35612	2.75997	0	3.4188	1.78063	0.11574	0.04807	0	0	7.87749	0.42735	0	7.80627	2.59259	1560	>500	14	4
IPB	0	0.87657	3.0388	0.35063	2.80505	0	4.67508	0	0.70126	6.54511	0	0	0.32725	0	6.87237	0	0.23375	5.7036	3.27256	0	0.37985	2.72713	0.6623	2.74661	0	1.85055	0	0.81813	4.67508	0	0.00584	0.10908	0	2.50896	0	0	4.13745	2.1817	1426	>500	18	4
IPB	0	1.17529	6.26819	16.1742	5.03694	0	2.23864	0	1.00739	7.61137	0.36377	0.08394	0.62681	0	17.5509	0	0	6.5816	4.70114	0	0.72755	3.88031	11.5477	3.07813	0	0.46638	0	1.00739	7.68599	0.11193	0.03917	0.52234	0	9.50675	0	0	4.96232	3.86538	1489	>500	18	4
IPB	3.78788	3.78788	9.89057	7.36532	3.31439	0.21043	2.63047	0	6.62879	14.3098	0.34196	0.2683	0	0	12.8157	1.89394	8.89099	14.0993	7.36532	0.84175	1.52567	7.43547	4.64717	2.52525	0	1.92901	0	3.99832	9.29433	0.07891	0.23674	0	0	7.46352	1.89394	5.01543	11.2023	4.7138	1584	>500	18	4
IPB	4.64756	3.09837	8.52053	13.039	5.03486	0	3.55022	0	6.19675	8.26233	0.25819	0.07745	0	0	2.16886	0	0	9.50168	0	2.06558	1.51691	5.07789	6.82072	3.22747	0	1.93648	0	4.90576	4.99182	0.08606	0.03227	0	0	0.24098	0.77459	0	7.4447	0	1291	>500	18	4
IPB	1.34862	1.85435	7.86694	12.6433	0.6743	0	3.93347	0	7.75455	8.09171	0.84288	0.05057	1.25871	0	4.72016	0	1.01146	5.82153	0	0.89907	0.30905	3.29662	8.42886	0.11238	0	2.80962	0	6.85547	3.89601	0.52446	0.06181	1.15382	0	2.0454	0	0.56192	5.01985	0.62935	1483	>500	18	4
OSTEO	0	2.77008	1.84672	11.946	6.75208	0	0.5771	0	1.38504	1.84672	0.17313	0	0	0	9.85688	0	0.08656	6.67128	0	0	2.51039	2.69314	6.80979	3.86657	0	0.5771	0	1.38504	1.7313	0.08656	0	0	0	6.3558	0	0.51939	7.51	0	1444	>500	14	4
IPB	0.75187	1.8797	17.0426	28.3835	7.14286	0	0	0	2.25564	12.0301	0.53258	0.48872	0	0	8.07018	0	0	6.31579	1.40351	0.25062	1.15915	11.0276	17.4812	4.19799	0	2.40184	0	1.62907	6.85046	0.21929	0.25689	0	0	3.39181	0	0	3.54219	0.70175	1330	>500	6	4
OSTEO	0	1.64474	7.89474	23.0263	2.63158	0	0	0	0	21.9298	0.65789	0.13157	0	0	4.91228	0	0	4.03509	3.68421	0	0.93201	5.40936	13.4868	1.42544	0	0	0	0	13.4503	0	0.04385	0.40935	0	3.27485	0	0	3.18713	2.04678	760	>500	18	4
OSTEO	4.971	2.17481	4.971	31.9663	2.89975	0	2.76167	0	9.1135	20.9887	0.24164	0.08285	0	0	1.54653	0	0	4.03204	0	1.10467	1.44988	3.59017	20.5054	1.657	0.09205	2.41646	0	7.31842	12.7037	0.11506	0.02071	0	0	1.28878	0	0	3.19433	0.25775	1207	>500	20	4
OSTEO	1.29366	1.29366	5.60586	5.44416	1.61708	0	1.34756	0	9.05563	10.3493	0.1617	0.17787	0	0	4.52781	0	0.1617	5.00216	3.3204	0	0.78158	3.23415	5.7496	1.07805	0	0.53902	0	5.71367	5.89334	0.23357	0.07546	0.70432	0	2.81731	0	0.26951	3.35633	3.82349	1546	>500	20	4
OSTEO	0.67114	3.27181	12.3042	9.89933	3.02013	0	0	0	0	6.93512	0	0.26845	0.93959	0.67114	5.32438	0	0	0.62639	1.566	1.34228	1.53803	6.71141	7.53169	2.18121	0	0	0	0	5.59284	0	0.17897	0.41759	0.44742	3.96719	0	0	0.82028	0.41759	1490	>500	18	4
OSTEO	1.27551	1.43495	6.59014	14.6152	3.18878	0	0.53146	0	2.23214	15.3061	0.15943	0.03188	0	0	6.25	0	0.42517	7.44048	0	0.42517	0.53146	2.55102	6.0941	2.28529	0	0.17715	0	0.63775	7.79478	0.22144	0.01594	0	0	3.37302	0	0.19486	3.76984	0.49603	1568	>500	18	4
OSTEO	3.42466	3.25342	9.58904	6.05023	2.39726	0	3.71005	0.63926	1.71233	7.76256	0	0.01712	0.63926	0	12.7854	0	0	4.79452	1.91781	1.36986	2.39726	7.76256	3.3105	1.36986	0	3.13927	0.53272	0.91324	5.78387	0.19977	0.04566	1.49163	0	10.1218	0.57077	0	0.85235	1.49163	1460	>500	14	4
OSTEO	2.31481	1.15741	4.11523	5.33693	6.55864	0	1.60751	0	1.15741	5.14403	0.1286	0.03858	0.72016	0	5.40123	0	1.02881	10.8539	3.60082	1.54321	0.86805	2.91495	2.05761	3.79372	0	0.9645	0	1.15741	3.94376	0.04286	0.01286	0	0	3.84088	0	0	5.54698	1.44033	1296	>500	18	4
IPB	2	2.16667	11.1111	6.22222	5	0.22222	2.5	0	2.66667	9.77778	0	0.03333	0	0	8.08889	0	0	4.51111	1.86667	0.44444	0.91666	7.18519	3.42593	3.72222	0.07407	1.94444	0	3.22222	6.37037	0.03703	0.02222	0	0	5.6	0	0	1.81481	2.07407	1500	>500	18	4
OSTEO	0	0.79516	12.9347	29.8452	4.45293	0	3.71077	0	7.31552	13.9949	0	0.06361	0	0	6.2341	1.9084	0.15903	14.419	0.29686	0	0.15903	6.64405	18.1474	2.91561	0	0.70681	0	3.60475	8.37574	0	0.0212	0	0	4.84874	0	0.15903	6.5663	0	1572	>500	6	4
IPB	0	1.26103	8.82724	9.8781	5.04414	0.42034	0.52543	0	2.52207	13.8714	0.07881	0	0	0	7.35603	0.31525	0	19.567	2.64817	0	1.28731	5.81477	6.20008	3.62547	0	0.43785	0	1.57629	10.6487	0.0613	0.02101	0	0	5.29634	0	0.28022	14.0045	2.15777	1586	>500	6	4
OSTEO	0	0	8.21202	12.4114	0	0	0	0	6.71892	14.1844	0.13997	0	0	0	6.271	0	0	2.09033	5.74841	0	0.74654	7.0922	13.6245	0.18663	0	1.24425	0	6.71892	8.70972	0.41993	0.00933	0	0	4.00647	0	0	0.92074	4.52905	893	>500	20	4
IPB	0	1.60485	11.8878	9.9263	2.1398	1.42653	1.18878	0	2.1398	12.3633	0.35663	0.16048	0.66571	0	4.66001	0	0.35663	5.46838	2.66286	0	1.51569	8.95546	6.65716	1.48597	0.1585	1.08971	0	2.25868	6.02314	0.13869	0.07727	0.44381	0	1.99715	0	0.49532	3.37613	0.88762	1402	>500	6	4
IPB	0	0	5.06446	2.30203	0	0.92081	0	0	5.52486	5.52486	0	0	0	0	6.44567	2.76243	0	8.7477	1.28913	0	0.2302	3.68324	4.68079	0	0.30693	1.34285	0.42971	6.90608	0.61387	0.09591	0.04604	0	0	3.43769	2.76243	0	4.75752	0.85942	724	>500	14	4
OSTEO	3.82409	0.47801	15.9337	27.1404	0	0.42489	0	0	12.1096	8.92288	0.34523	0.15933	0	0	2.97429	0	0	5.09879	1.78458	3.18674	0.26556	10.3392	18.1998	0.31867	0.42489	0.70816	0	9.454	9.63105	0.26556	0.04248	0	0	2.47858	0	0	3.6683	0.99143	1569	>500	20	4
OSTEO	0	1.59236	8.49257	6.58174	4.4586	0.84925	1.06157	0	0.63694	12.7388	0.05307	0	0	0	2.37792	0	0.31847	6.53928	3.56688	0.84925	0.95541	5.9448	3.50318	2.76008	0	1.2385	0	0	6.79406	0	0.06369	0	0	1.9816	0	0.74309	2.68931	1.78344	785	>500	14	4
IPB	0	1.2054	13.8219	16.4738	2.4108	0	1.2054	0	7.2324	5.14304	0	0	0.90003	0	4.05014	0	0	4.05014	0.90003	0	1.28576	13.8219	19.6346	3.13404	0	1.07147	0	5.94664	11.7861	0.22768	0.05625	1.05004	0	6.30023	0.32144	0	2.32508	1.20004	1037	>500	6	4
IPB	6.72043	3.1922	4.03226	4.59229	0	0	1.68011	0	2.68817	6.38441	0	0.16801	0	0	11.9176	0	0.44802	11.6263	2.19534	2.91219	1.65211	2.91219	3.22954	0.056	0.07467	1.49343	0	2.35215	3.69624	0.07467	0.0448	0.5227	0	7.73596	0	0.29868	6.7951	1.46356	1488	>500	14	4
IPB	0	0.64061	11.5311	6.88661	4.80461	0	0	0	0.3203	17.0831	0.29361	0.12812	0.29895	0	2.39163	0	0.74738	5.97907	1.79372	0.42707	0.53384	5.83671	5.08933	3.36323	0	0	0	0.96092	9.39569	0.48935	0.08541	0.29895	0	4.18535	0	0.3381	4.49142	1.29547	1561	>500	14	4
IPB	0.63856	1.19732	7.87569	6.33248	3.83142	0	3.19285	0	1.91571	12.7714	0.07982	0	0.29799	0	5.06599	0	0.85142	9.21669	0.89399	0.42571	1.01107	7.73379	4.41677	0.90464	0	0.8869	0	1.27714	5.67617	0.07982	0.01596	0	0	3.57599	0	0.34589	5.15822	0.19866	1566	>500	14	4
OSTEO	1.28205	1.12179	9.82906	18.8568	0.64102	0	1.06838	0.29914	3.52564	11.7521	0.61431	0.22435	0	0	2.39316	0.64102	0.42735	3.07692	2.99145	0.8547	0.26709	7.97721	13.1232	0.96153	0	0.08903	0	5.98291	12.5356	0.2938	0.09081	0.29914	0	1.19658	0.10683	0.19586	2.40741	2.39316	1560	>500	20	4
IPB	0	1.1655	8.93551	5.53613	2.331	0	0.97125	0	0	6.21601	0	0.17482	0	0.58275	10.878	0	0	3.53535	0	1.1655	0.87412	4.921	4.144	1.9425	0	0.32375	0	0	3.626	0.03237	0.0777	0	0	6.16421	0	0	1.8648	0.7252	858	>500	6	4
IPB	0	0.48987	5.66079	7.13042	0	0.65316	0.5443	0	3.59242	11.5393	0.27215	0.03265	1.21925	0	8.53473	0.32658	0	8.83954	4.57218	0.87089	0.1905	4.93505	5.42492	0	0.07257	0.18143	0	2.61267	8.7089	0.07257	0.00544	1.11764	0	5.2834	0.43544	0.07257	5.79142	2.6417	1531	>500	18	4
OSTEO	0	0.49701	12.9225	20.2949	0	0	5.38436	0.92776	9.44334	11.9284	0.41418	0.07455	0	0	8.3499	0.99403	0	3.84361	7.42213	0.66269	1.20113	7.51049	10.0508	0	0	1.51867	0.61851	6.79258	5.41197	0.20709	0	0	0	6.95825	0	0	1.63464	3.71107	1006	>500	20	4
OSTEO	0.71736	0.35868	7.89096	3.34768	1.7934	0	0	0	0	8.60832	0	0.25107	0	0	2.67814	0	0	0.66953	0	0.47824	0.53802	5.57947	2.82959	1.1956	0	0.49816	0	0.23912	4.30416	0.17934	0.08369	0	0	1.33907	0	0	0.55794	0	1394	>500	18	4
OSTEO	0	1.24008	13.6684	12.015	4.62963	0	2.75573	0	7.60582	17.6367	0.55114	1.04167	1.23457	0	8.33333	3.63757	0	9.39153	0	0	0.55114	7.71605	8.00999	4.40917	0	1.7453	0	6.17284	11.1699	0.11022	0.71649	2.05761	0	6.79012	4.62963	0	9.33275	0	1512	>500	14	4
IPB	0	0.70168	11.2269	8.55386	2.80674	0	2.33895	0	12.0289	18.177	0	0.18043	0	0	4.86501	0	2.94039	8.79444	1.49693	0	0.20048	6.77181	6.32629	1.33654	0	1.89343	0	3.2077	7.66284	0.0891	0.10024	0.24948	0	3.74231	0	1.42564	11.4052	0.24948	1247	>500	14	4
IPB	1.49701	6.26871	17.9641	8.91966	3.55539	0	0.31187	0	6.73653	0.998	0	0.7485	0	0	4.89022	0	0	8.73253	1.0479	1.49701	6.5494	20.7918	11.9345	4.24152	0	0.62375	0	7.11078	0.998	0.07277	0.86701	0	0	5.23952	0.37425	0	12.9574	0.6986	1336	>500	6	4
OSTEO	0	0.499	9.75826	5.32269	2.32868	0	1.10889	0	2.99401	10.6454	0.38811	0.03326	0	0	4.34686	0	0	4.43557	0	0	0.58216	6.57943	3.47453	1.77423	0	0.92407	0	2.88312	7.6144	0.16633	0	0	0	3.31189	0	0	2.95705	0	1503	>500	14	4
OSTEO	0	4.11184	19.1886	15.8991	0	0	1.37061	0	9.86842	10.9649	0.41118	0	0	0	19.9561	1.64474	0	2.30263	1.53509	0	3.15241	13.5234	9.82273	0	0	0	0	4.11184	4.38596	0.09137	0	0	0	14.5833	1.37061	0	1.27924	2.55848	608	>500	18	4
IPB	3.61991	1.58371	14.7813	6.03318	1.80995	0.60331	2.26244	0	1.80995	5.42986	0.41478	0	0	0	5.06787	0.90497	1.80995	0.60331	0	2.71493	1.0181	8.74811	2.13675	0.60331	0	1.75968	0	0.90497	3.61991	0.18853	0	0	0	3.23781	0.90497	0.94268	0.24132	0	1105	>500	14	4
OSTEO	0	0.23764	7.60456	5.78264	0.95057	0	0.39607	0	0	9.5057	0.07921	0.19011	0	0	8.87199	0.95057	0	13.4347	0	0	0	4.96409	3.53823	1.26743	0	0.13202	0	0.31685	5.49218	0.0396	0.08713	0.14786	0	5.76679	0	0	9.08323	0	1052	>500	6	4
OSTEO	0	2.5641	17.5214	4.00641	2.5641	0	2.93803	0	2.5641	6.41026	0	0.01602	0	0	5.98291	0.64102	0	2.64957	1.19658	1.28205	1.38889	14.1026	6.17877	2.72436	0	1.4245	0	1.92308	5.19943	0.06232	0.05341	0.19943	0	3.09117	0.32051	0.05341	2.13675	1.09687	1560	>500	14	4
OSTEO	2.59403	1.05383	7.56593	11.6731	2.26978	0.86467	1.89148	0	0.6485	3.02637	0.81063	0.06485	0	0	9.68439	0	0.32425	5.85819	0	2.59403	0.70255	4.9719	7.4038	1.67531	0.86467	0.72056	0	0.86467	3.17049	0.11709	0.07565	0.30263	0	5.54835	0	0	4.30898	0.80703	1542	>500	14	4
IPB	1.29955	4.38596	4.98159	8.23045	2.2742	0	1.35369	0	0.97465	1.29955	0	0.04873	0	0	4.24518	0	0.16244	5.45809	2.12259	1.29955	3.19472	3.39326	6.11869	1.08295	0.07219	0.90246	0	1.29955	0.86636	0.12634	0.02165	0.50537	0	2.32474	0	0.10829	2.07205	2.02151	1539	>500	14	4
IPB	0	1.55971	0	0.66844	0.44563	0	1.48544	0	0	1.18835	0	0.1114	0	0	0.83184	0	0	10.5466	0	0	0.96553	0.19805	1.93108	0.22281	0	1.11408	0	0	0.39611	0.01237	0.05941	0	0	0.6932	0	0	5.81303	0	1122	>500	6	4
OSTEO	3.48675	1.22036	13.7145	19.4677	7.67085	0	4.649	0	5.5788	11.855	0.02905	0.67991	0.32543	0	13.0172	0	0	6.22966	2.92887	0.69735	1.33659	11.0026	13.6564	4.59089	0.07748	0.96854	0	3.48675	8.8331	0.02905	0.34286	0	0	6.99675	0	0	4.46304	3.47125	1434	>500	6	4
OSTEO	0.66934	2.3427	8.03213	13.8331	4.35074	0	0.55778	0	4.01606	12.4944	0.55778	0.87014	1.5618	0	6.87193	0	0	3.79295	0.62472	0.44622	1.78492	5.80098	8.45976	3.68139	0	0.74371	0	3.90451	7.28841	0.27889	0.49085	0.72884	0	5.72661	0	0	3.45084	3.01949	1494	>500	14	4
OSTEO	0	0.3045	17.0524	22.026	4.26309	0	0	0	3.65408	6.49614	0.05075	0.0609	0	0	8.52619	0	2.0808	0.56841	0	0	0.60901	15.4283	12.0788	3.04507	0	0.33834	0	1.82704	7.30816	0.01691	0.0812	1.13683	0	6.25254	0	0.67668	0.66314	1.13683	821	>500	14	4
IPB	0	0.15862	5.49915	3.75423	0	0	0	0	0	2.11506	0	0.07931	0	0	0.59221	0	0.37013	3.10914	0	0	0.23794	7.33221	6.11605	0.63451	0	0	0	0	4.58263	0.05287	0.11104	0	0	1.57924	0	0.02643	5.61196	0	1576	>500	6	4
IPB	0	0.79063	3.37339	6.74678	1.58128	0.21083	2.89901	0	0.31625	4.84925	0.15812	0.07906	0.29517	0	2.0662	0	1.1596	10.6262	0.29517	0	0.47438	4.21674	4.07618	1.05419	0	1.22988	0	0.52709	3.09228	0.03513	0.06325	0	0.0527	2.36137	0	1.08054	7.18251	1.18069	1581	>500	18	4
OSTEO	0	0.6024	6.69344	5.89023	0.4016	0	1.33869	0	2.40964	1.07095	0	0.08032	0	0	8.24632	0	1.80723	6.34538	3.74833	0.53547	1.60643	10.7095	7.3851	0.53547	0.17849	0.66934	0	5.35475	6.96118	0.55778	0.04685	0.24988	0.26773	8.49621	0.26773	2.03034	7.77332	3.12361	1245	>500	14	4
IPB	0	0.37955	5.39811	7.92848	3.54251	0	0	0	3.54251	5.39811	0.08434	0.0253	0	0	6.14035	0	1.68691	2.83401	1.88934	0	0.25303	4.04858	3.96424	1.34953	0	0	0	1.51822	3.82366	0.04217	0.0253	0	0	4.25101	0	0.67476	1.417	1.73189	988	>500	14	4
OSTEO	1.41643	1.94759	9.91501	9.32483	2.47875	0	1.77054	0	1.41643	10.3872	0.41312	0.08852	0	0	10.9065	0	0.47214	8.02644	3.305	2.83286	1.18036	5.98048	9.61992	3.48206	0	0.59017	0	1.18036	8.02644	0.3541	0.05311	0.88133	0	7.38118	0.47214	0.82625	5.61064	2.3135	1412	>500	14	4
IPB	0	2.76461	15.5345	5.79252	2.56714	0	1.6456	0	3.15956	6.84571	0.23038	0.07898	0	0	11.4271	0	0.09873	2.00105	4.05477	0	1.54687	11.3217	4.73934	1.9089	0	0.76794	0	0.52659	2.45743	0.21941	0.08557	0.24574	0	6.14358	0	0.13164	3.05424	1.84308	1266	>500	14	4
OSTEO	1.85357	1.62187	14.2107	2.47142	3.70714	0	0	0	2.78035	3.08928	0.65647	0.23169	0	0	7.35249	0	2.78035	3.02749	1.73	2.47142	0.7337	7.20832	2.05952	2.54866	0	0	0	2.1625	5.5607	0.16733	0.1004	0	0	5.04582	0	0.61785	1.44166	1.44166	1079	>500	14	4
IPB	0	0.34818	28.7837	10.4457	4.17827	0	0	0	4.17827	9.28505	1.04457	0	0.64995	0	12.3491	0	0	7.79944	5.84958	0.46425	0.17409	15.4751	10.1362	2.78552	0	0.96719	0	1.85701	5.57103	0.11606	0	1.73321	0	14.5156	0.9285	0	5.07583	3.46642	718	>500	14	4
OSTEO	0	0.87473	4.19874	2.62421	2.44927	0	0.58315	0	2.09937	3.73221	0	0.45486	0	0	7.83765	0	0	1.7728	1.30627	0	1.07884	2.02162	3.14906	2.68253	0	0.87473	0.65313	0.93305	1.39958	0.21382	0.29157	0	0	5.66052	0	0	0.69979	2.61255	1429	>500	14	4
IPB	0	0	1.98708	4.96771	0	0	0	0	0	3.97417	0	0	0	0	2.78192	0	0	2.78192	2.78192	0	0	2.48385	4.18116	0.24838	0	0	0	0.74515	3.64299	0.04139	0.08693	0	0	3.24557	0.24838	0	0.9273	1.62279	671	>500	6	4
OSTEO	0	0.65746	10.7386	10.5194	9.20447	0	1.09577	0	5.91716	20.2718	0.16436	0.80539	0	0	2.14771	0	0	4.6899	1.84089	0	0.54788	11.7613	8.30959	7.45124	0	0.45657	0	4.38308	14.2085	0.31046	0.39995	0.51135	0	3.37497	0.54788	0	4.30272	0	1521	>500	14	4
IPB	0	2.72162	7.77605	17.2369	1.55521	0	1.29601	0	6.22084	6.22084	0.1296	0.07776	1.45153	0	2.17729	0	0	17.4184	1.45153	0	2.46242	4.66563	9.50406	0	0	0.864	0	2.59202	5.18403	0.0432	0.05184	0	0	1.45153	0	0	8.41541	1.45153	643	>500	14	4
IPB	7.87966	2.32808	2.86533	7.16332	1.43266	0	0.59694	0	1.79083	12.6552	0.17908	0.08954	0	0	2.17287	0	0	8.52436	1.33715	2.86533	1.49236	4.61636	6.3276	1.19389	0	0.79592	0	2.38777	10.2674	0.05969	0.10148	0.55714	0	2.89717	0	0	6.67781	1.11429	1396	>500	6	4
OSTEO	1.90295	0.95147	14.5893	9.1183	0	0	0	0	1.42721	4.75737	0	0.23786	0.44402	0	3.10815	0	0	5.67713	0	0	0.23786	5.39169	6.1053	0	0	0	0	0.79289	3.8059	0.03964	0.03171	0.29601	0	1.18406	0	0	3.74247	0.29601	1051	>500	6	4
OSTEO	0	4.05501	7.52233	8.11001	7.05219	0	2.35073	0	0	0.47014	0	0.10578	0	0	6.58204	0	0	8.88575	2.63282	0	4.64269	5.1716	4.34885	4.11378	0.15671	1.37126	0	0	1.41044	0	0.0235	0	0	6.58204	0	0	7.45965	1.53581	709	>500	6	4
OSTEO	7.18016	1.38708	15.6658	20.4526	2.2846	0	0.54395	1.21845	8.15927	4.35161	0.13598	0.11422	0	0	14.0122	1.63185	0	5.22193	3.04613	3.69887	1.0607	11.5318	11.4411	1.0879	0	0.36263	0.60922	6.41862	3.04613	0.01813	0.04351	0.20307	0	10.1538	0.76153	0.07252	3.42327	1.01538	1532	>500	20	4
IPB	0	0.26766	0.71377	2.67666	1.07066	0	0.89221	0	2.14133	2.8551	0.26766	0.05353	0	0	4.99643	0	0.71377	0	0.99928	0	0	3.33095	0.89221	0	0	0.59481	0	2.14133	1.9034	0.08922	0.03568	0	0	3.99714	0	0.23792	0	0.33309	934	>500	14	4
OSTEO	0	2.27964	6.83891	10.385	4.17933	0.25329	2.21631	0	1.51976	9.49848	0.06332	0.22796	0	0	15.9574	0	1.01317	7.95339	6.73759	0	1.26646	4.6437	7.61989	1.8997	0.08443	1.8997	0	1.26646	3.84161	0.12664	0.09498	0.59101	0	9.57447	0.12664	0.31661	4.19622	2.60047	1316	>500	14	4
OSTEO	0	1.02041	9.52381	10.2041	7.90816	0	0.85034	0	5.10204	18.0272	0.08503	0.15306	0.95238	0	15.7143	0	0	9.04762	3.80952	0	1.36054	5.66893	7.51134	3.9966	0.22675	0.14172	0	2.04082	10.8277	0.19841	0.14455	1.74603	0	10.1587	0	0	4.37642	2.38095	980	>500	14	4
OSTEO	7.19424	4.04676	8.99281	13.6391	5.39568	0	1.8735	0	0	4.79616	0	0	0	0.44964	6.71463	0	0	7.97362	3.35731	3.59712	2.32314	4.69624	9.59233	2.69784	0	1.1241	0	0.29976	3.59712	0.07494	0.01498	0	0	2.79776	0.29976	0	4.98601	0.83932	1112	>500	6	4
OSTEO	1.83262	3.51252	3.66524	21.0242	0.76359	0	1.78171	0	5.49786	15.8827	0.10181	0.06108	0	0	9.12238	0	1.11993	6.27164	2.28059	1.629	2.13806	5.02274	12.4041	0.71268	0	1.44234	0	3.66524	8.82373	0.15271	0.04072	0	0	8.17213	0	0.20362	5.14491	1.71045	1637	>500	18	4
IPB	0	1.11073	3.64548	8.20232	3.7594	0	0.5696	1.27592	2.05058	5.9239	0	0.05126	0	0	1.27592	0	0.45568	3.18979	1.91388	0	0.8544	0.98731	4.10116	2.39234	0	0.18986	0.4253	2.05058	3.94927	0	0.03987	0	0	1.16959	0	0.60757	2.49867	1.27592	1463	>500	14	4
IPB	3.74766	1.56152	12.0758	9.47325	2.81074	0	0	0	1.87383	5.82969	0	0.18738	0	0	21.5698	2.49844	0	5.68395	11.6594	2.49844	1.14512	7.98112	6.95746	2.18613	0	0	0	1.24922	5.06628	0.12145	0.1041	0.19432	0	10.1048	1.04102	0	3.71296	7.67576	1601	>500	18	4
IPB	0	1.06424	11.3519	5.03096	2.32198	0	3.22497	0	1.54799	25.4128	0.38699	0.29024	0	0	0	0.77399	0	4.38596	3.61197	0	0.41924	6.62195	3.13897	0.64499	0	1.50499	0	0.64499	11.3949	0.12899	0.22574	0	0	0.24079	0.77399	0	2.45098	3.73237	1292	>500	14	4
IPB	0	2.6455	54.6737	5.29101	14.5503	0	0	0	0	0	0	0	0	0	14.8148	0	0	27.866	19.7531	0	1.32275	30.5703	1.76367	9.70018	0	0	0	0	0	0	0	0	0	10.6996	0	0	18.93	10.6996	189	<300	18	4
OSTEO	0	0	0	0	0	0	0	0	0	0	0	0	0	0	0	0	0	0	0	0	0	0	0	0	0	0	0	0	0	0	0	0	0	0	0	0	0	0	1525	>500	14	4
OSTEO	0	0.32092	6.41849	13.2114	1.92555	0	1.06975	0	3.20924	12.623	0.1872	0.06418	0.89858	0	7.78776	0	1.23021	5.47711	1.79718	0	0.10697	6.56112	7.50606	2.29996	0.14263	0.17829	0	2.88832	10.4835	0.13371	0.02139	0.99843	0	5.7909	0.10697	0.2496	2.96677	2.69576	1558	>500	14	4
IPB	0	0	14.6374	16.1344	1.99601	0.33266	0	0	8.98204	7.98403	0.58216	0	0	0	11.1776	0	0.7485	3.26015	5.58882	0	0.16633	10.6454	8.03948	0.66533	0	0.83166	0	7.3187	9.98004	0	0	0	0	6.83078	0	0.2495	1.08672	2.48392	1002	>500	14	4
OSTEO	0	0.32092	11.7672	7.06033	4.17202	0	0.53487	0	1.92555	6.41849	3.58365	0.4172	0	0.32092	3.59435	0	1.06975	2.1395	1.49765	0.85579	0.26743	6.98902	4.11853	2.56739	0	0.53487	0	0.74882	3.85109	1.03409	0.17115	0.29952	0.16046	2.99529	0	0.26743	1.40494	0	1558	>500	14	4
OSTEO	2.60756	0.65189	6.08431	5.21512	2.93351	0.43459	2.17297	0	3.91134	13.907	0.97783	0.13037	0	0.65189	6.08431	0	0.97783	3.04216	0	0	1.95567	4.4908	6.08431	4.01999	0.14486	0.36216	0	3.04216	8.90917	0.43459	0.02172	0	0	5.8815	0	0.92351	2.43372	0.40562	767	>500	14	4
OSTEO	0	0.58094	21.4304	22.205	9.10147	0	0	0	4.64756	6.97134	0	0.30983	0	0	11.748	0	0.77459	1.31681	0.72295	0	0.06454	13.6845	13.8996	4.97031	0	0	0	1.93648	5.33609	0	0.15491	0	0	4.81969	0	1.03279	1.00697	1.20492	1291	>500	6	4
OSTEO	2.81294	1.58228	18.5185	28.0122	1.9339	0.46882	0.87904	0	2.1097	6.56353	0.0586	0.21097	0	0	5.90717	1.05485	0	7.07923	3.28176	1.40647	0.64463	11.2518	23.2263	1.05485	0.15627	0.6837	0	1.9925	5.4696	0.01953	0.07618	0	0	3.82872	0.1172	0	4.65698	2.40663	1422	>500	6	4
IPB	0	3.61337	3.91448	12.6468	0	0	2.25836	0	0.90334	5.42005	0.26347	0.1355	0	0	2.1078	1.35501	1.80668	1.56579	0	0.30111	3.1617	2.8104	8.23045	0	0	1.7565	0	1.50557	4.81783	0.07527	0.09033	0.28103	0	2.03754	1.50557	0.80297	2.14795	0	1107	>500	14	4
IPB	0	1.03377	8.04043	6.20262	3.96278	0	6.31748	0	2.41213	10.108	0.34458	0.05168	0.96485	0	5.78911	0.34458	0.68917	6.50126	0	0	1.03377	8.34673	2.68014	2.64186	0	5.16885	0	2.75672	7.5044	0.067	0.02871	0.64323	0	3.85941	0	0.15315	3.93598	0	1451	>500	6	4
IPB	0	2.16138	13.4486	20.6532	6.7243	0	0	0	4.80307	15.3698	0	0.14409	0.89657	0	4.48287	4.32277	0.24015	19.7887	0	0	1.04067	6.19063	6.93777	3.20205	0	0	0	2.24143	8.5388	0.08005	0.11207	0.59771	0	1.49429	4.16266	0.29352	8.66688	0.59771	1041	>500	14	4
OSTEO	4.80192	0.90036	6.80272	2.60104	0	0	2.0008	0	0	7.20288	0.60024	0	2.80112	0	5.04202	0	0	5.60224	2.2409	2.40096	1.0004	3.06789	1.93411	0	0.26677	1.0004	0	0	6.93611	0	0	2.61438	0	1.49393	0	0	2.42764	1.49393	833	>500	18	4
IPB	0	0.81327	14.5305	26.6753	2.92778	0.21687	1.35545	0	1.95185	4.01214	1.13858	0.03253	0	0	1.21449	0	0	4.96638	1.21449	0	0.3253	11.8557	15.8136	2.22295	0.28916	0.54218	0	2.16873	5.31338	0.10843	0	0	0	1.51811	0	0.14458	3.52057	0.60724	1537	>500	6	4
IPB	0	3.06698	5.96817	9.06278	3.813	0	1.10522	0	5.6366	7.73652	0.49734	0.08289	0.61892	0	5.26083	0.99469	0	11.1406	4.33245	0.44208	1.51967	5.4524	7.05497	3.14987	0	0.92101	0	2.65252	5.30504	0.10131	0.03315	0.61892	0	1.341	0.88417	0	6.75656	3.81668	1508	>500	14	4
IPB	0	2.08333	16.1111	7.91667	1.66667	0	2.08333	0	4.16667	14.4444	0	0.08333	1.55556	0	3.5	1.66667	0	5.88889	1.55556	0	1.18056	13.8889	4.02778	0.69444	0	1.85185	0	3.33333	10	0	0.04166	0.64814	0	2.33333	0.83333	0.27777	3.27778	0.64814	1200	>500	14	4
IPB	0	2.03362	11.2075	17.2632	1.89805	0	3.61533	0	2.7115	11.7498	0.04519	0.24403	1.51844	0	14.1721	0	0	19.5589	5.56761	0	1.53651	7.23066	9.70113	1.6269	0	1.65703	0	2.1692	5.60376	0.21089	0.14461	0.33743	0	6.74861	0.36153	0.90383	10.9906	4.21788	922	>500	20	4
OSTEO	3.83387	2.71565	24.4941	24.4941	2.23642	0	0	1.78914	4.15335	14.9095	0	0.36741	0	0	6.26198	0	0	10.7348	6.26198	4.47284	1.91693	14.6965	15.7437	1.3312	0.07099	0.08874	0.79517	3.72737	9.44267	0	0.28221	0.19879	0	5.16862	0	0	8.89599	4.37345	1565	>500	6	4
OSTEO	0.86956	2.17391	6.66667	12.3913	0.86956	0	0	0	3.91304	14.3478	0.25362	0.04347	0	0	14.6087	1.73913	0.86956	3.85507	6.89855	0	1.66667	4.83092	11.2802	1.5942	0	0.24154	0	4.92754	6.76329	0.25362	0.07246	0.13526	0	9.60386	0.57971	0.10869	3.17874	4.3285	1150	>500	20	4
OSTEO	0	1.3369	1.78253	1.78253	0.66844	0	0	0	5.34759	3.56506	0.77985	0.10026	1.24777	0	6.23886	4.0107	0	5.92692	4.3672	0	1.00267	1.48544	2.71093	0	0	0	0	1.3369	5.34759	0.25995	0.16711	0.83184	0	3.74332	0.89126	0	4.90196	3.53535	748	>500	14	4
IPB	0	2.08333	14.2857	6.94444	3.57143	0	0	0	0	12.6984	0	0	0	0	3.33333	0	0	13.1746	0	0	1.5873	10.3175	2.97619	2.77778	0	0	0	0	11.1111	0.26455	0	0	0	2.22222	0	0.5291	8.7037	0	420	300-500	6	4
IPB	0	1.30073	4.85605	8.15123	5.98335	0	0.43357	0	0	2.08117	0	0	0.4856	0	8.25529	0.52029	0	7.70031	0.97121	1.04058	1.7343	5.43415	6.73488	2.77489	0	1.58978	0	1.04058	3.46861	0	0.03468	0	0	4.69418	1.21401	0	4.17389	2.42803	961	>500	18	4
IPB	0	3.04204	21.0177	22.1239	6.63717	0	3.68732	0	7.74336	6.63717	0	0.3042	0	0	5.16224	0	0.55309	9.55015	0	0	1.70538	13.5202	12.1067	4.14823	0	2.45821	0	5.16224	4.48623	0.09218	0.09218	0	0	2.92527	0	0	5.42035	0	904	>500	14	4
OSTEO	5.47196	3.67647	5.24396	21.9448	2.56498	0	0.85499	0	0.34199	5.92795	0.02849	0.41039	1.59599	0	6.70315	0	0	11.0807	3.83037	2.96398	1.70999	4.33197	12.9199	1.36799	0	0.28499	0	0.45599	2.20398	0.01899	0.25649	0.42559	0	3.08558	0	0	5.59356	1.59599	1462	>500	6	4
IPB	1.57233	1.57233	9.17191	8.25472	0.78616	0.5241	0	0	3.93082	5.24109	0	0.07861	0.73375	0	5.87002	0	1.57233	3.11845	0	0.5241	0.68789	7.77428	8.9972	2.09644	0.69881	0.10918	0	3.27568	7.33753	0.04367	0.10482	0.61146	0	4.28022	1.70335	0	3.97449	0.48916	1272	>500	6	4
IPB	3.76294	2.23424	12.8567	12.5431	7.76105	1.25431	2.74381	0	7.99624	5.01725	0	0.09407	0	0	7.02415	0	1.25431	14.0169	1.75604	4.39009	1.4503	10.7662	8.20529	4.78206	0.4181	4.18104	0	5.33082	3.97199	0.02613	0.03135	0.87801	0	4.24375	0	1.46336	7.14958	1.90237	1063	>500	20	4
IPB	4.53515	0.56689	10.582	18.5185	2.26757	0	0	0	0	1.88964	0.09448	0	0	0	0	6.80272	0	2.1164	0	1.51172	0.56689	6.55077	11.4638	3.2124	0	0.62988	0	2.6455	4.03124	0.09448	0.03779	0	0	0	1.51172	0	4.10683	0	441	300-500	6	4
IPB	0	1.12108	11.104	6.35277	3.20307	0	0.53384	0	2.56246	9.39569	0	0.06406	0	0	4.18535	0	0	10.079	1.79372	0.21353	0.90753	11.0328	4.75123	1.76169	0	0.97871	0	1.81508	7.9721	0.01779	0.06939	0	0	4.78326	0.10676	0	8.96149	3.78675	1561	>500	6	4
IPB	0	0.83752	12.0045	12.7722	4.60637	0	2.79174	0	4.1876	4.46678	0	0.04187	0	0	3.12674	0	0	6.47683	1.56337	0	0.83752	8.18909	7.02587	2.1636	0	1.62851	0	1.95422	4.46678	0	0.01395	0.26056	0	2.34506	0	0	4.57845	1.04225	1194	>500	6	4
IPB	0	2.41158	7.9314	11.8435	0	0	0.26795	0	2.2508	3.4298	0.16077	0.12861	0	0	4.2015	0	0.64308	9.73205	0	0	1.25938	5.78778	8.80672	0	0	0.5359	0	2.35798	2.6438	0	0.0643	0	0	3.20114	0	0.28581	6.63094	0.20007	1555	>500	6	4
IPB	0	0.16857	6.74309	4.04585	0	0	0	0	6.74309	8.99078	0.05619	0.37086	0	0	2.51742	0.33715	0.16857	23.8705	0.31467	0	0.16857	5.31955	3.2217	0	0	0.1873	0	3.93347	4.49539	0.06555	0.30343	0.20978	0	1.67828	0.22476	0.11238	17.09	0.62935	1483	>500	6	4
OSTEO	1.48368	0.18545	7.91296	7.17112	0.74183	0	1.8546	0	1.48368	10.8803	0.06181	0.03709	0	0	1.73096	0	0.18545	7.02275	0	0	0.34	4.86317	6.01714	0.86547	0	0.10303	0	1.2364	2.96736	0.04121	0.05563	0.46158	0	1.09627	0	0.06181	3.67623	0	1348	>500	20	4
IPB	0	0.68027	8.16327	2.72109	2.04082	0.45351	0.56689	0	6.80272	7.70975	0.62358	0.06802	0	0	6.34921	2.04082	0	1.90476	0	0.90702	1.92744	6.19803	1.81406	1.13379	0.15117	1.88964	0	3.62812	3.47695	0.05668	0.05668	0	0	4.65608	1.36054	0	1.90476	0	735	>500	14	4
OSTEO	0	1.76056	10.2433	9.38967	0.3201	0	0	0	2.56082	2.98762	0	0.12804	2.98762	0	8.36534	1.92061	0	0.89628	0	0.4268	2.6942	9.67421	7.41571	2.02732	0	1.06701	0	2.77422	5.40617	0.1067	0.09069	1.29464	0	6.97112	0.6402	0	0.64731	0.19917	1562	>500	14	4
IPB	1.90355	4.91751	1.05753	10.6811	0.47588	0	2.90821	0	3.80711	4.44162	0.05287	0.1269	0	0	6.07022	0	0	20.2623	3.84941	2.74958	3.30478	2.32657	10.2052	2.32657	0	1.67442	0	2.53807	4.65313	0.08812	0.09517	0	0	7.304	0.10575	0.38776	17.7312	3.652	1576	>500	6	4
OSTEO	0	1.49142	6.95998	8.57569	2.60999	0	2.17499	0	5.21999	10.44	0.52821	0.20507	0	0	10.788	0	1.11857	5.02113	4.52399	0	0.74571	3.89427	6.08998	0.99428	0.16571	0.72499	0	4.97141	7.29141	0.23821	0.06214	0.23199	0	6.84398	0	0	3.36399	3.24799	1341	>500	20	4
IPB	0	1.81638	7.48569	3.96301	3.96301	0	0	0	0	15.8521	0	0	0	0	7.39762	0	0	4.31528	1.23294	0	0.22016	6.60502	5.3574	1.54117	0	0	0	3.08234	9.10025	0	0	0.20548	0	3.69881	0.44033	0	3.69881	0.82195	757	>500	6	4
IPB	3.8835	0.80906	3.8835	7.71305	2.75081	0	0.53937	0	3.23625	10.356	0.18878	0.24271	1.2082	0	6.94714	0	0	5.69579	3.92665	2.80475	0.80906	2.87666	5.46566	1.99569	0	0	0.60409	1.18662	4.60266	0.21574	0.06472	0.90614	0	3.92665	0	0	3.33693	2.21503	1545	>500	20	4
OSTEO	0	0	4.30108	23.6559	0	1.07527	0	0	3.22581	17.2043	0	0.16129	0	0	7.52688	0	0.80645	3.01075	18.0645	0	0	3.22581	17.7419	1.07527	0	0	0	2.15054	4.30108	0	0	0	0	5.01792	0	1.20968	0.14336	5.51971	310	300-500	6	4
IPB	3.31675	3.31675	25.9812	35.9314	5.80431	0.55279	1.38198	0	9.95025	8.84467	0.06909	0.12437	0.7739	0.82918	23.9912	0	0	24.3228	13.9304	1.10558	1.58928	19.7162	20.7297	4.42233	0.36852	2.76396	0	5.52792	7.73908	0.50672	0.11055	0.51593	0	14.1883	0	0	13.8935	8.25502	603	>500	14	4
IPB	4.07332	2.03666	13.5777	10.1833	8.14664	0	0.8486	0.95044	11.2016	15.275	0	0	0	0	13.3062	0	0	9.77597	0	1.35777	1.61236	12.8988	4.78049	5.26137	0	0	0.79203	11.0319	9.50441	0.05657	0.01697	0.63362	0	7.76194	0.67888	0	6.506	0.31681	982	>500	20	4
IPB	2.03874	1.52905	6.11621	4.16242	1.52905	0	0	0	0	2.71831	0	0	0.95141	0	1.66497	1.01937	0.67957	2.37853	0	1.35916	1.27421	10.76	7.16389	1.35916	0	0.84947	0	1.52905	6.11621	0.18405	0.11892	3.32994	0	2.14067	0.67957	0.45305	4.49655	0	981	>500	6	4
OSTEO	1.30804	1.14454	2.61609	1.96207	0.65402	0	0	0	0.98103	1.30804	0.19075	0.0327	0	0	7.63026	0	0	5.49379	7.32505	0	1.14454	2.32541	1.8894	0.65402	0	0	0	0.43601	1.45338	0.03633	0.03815	0	0	3.96773	0	0	2.74689	3.56079	1529	>500	18	4
IPB	0	1.42045	9.4697	8.75947	4.26136	0	0	0	8.52273	15.1515	0	0	0	0	13.2576	0	2.84091	5.30303	2.65152	7.57576	1.89394	5.05051	5.28725	2.36742	0	0	0	5.68182	5.05051	0	0	0	0	9.2803	0	4.49811	2.2096	3.53535	352	300-500	18	4
OSTEO	0	1.66815	7.11744	7.93298	4.4484	0	0.74139	0	5.33808	14.2349	0	0.31138	0	0	7.47331	0.88967	0.22241	12.4555	0	0.59311	0.63018	3.36101	6.45018	2.2242	0	1.1121	0	5.9312	10.8739	0.04942	0.18534	0	0	4.98221	0.88967	1.1121	8.99565	1.10716	1124	>500	14	4
IPB	3.09598	3.86997	11.8679	10.5779	6.57895	0	3.86997	0	0.77399	10.3199	0	0	0	0	2.88958	0	2.57998	6.91434	1.44479	2.57998	3.03148	7.56794	6.92294	2.83798	0.17199	2.57998	0	1.41899	5.80495	0.21499	0.01289	0.24079	0	1.92638	0	0.77399	5.00516	0.60199	1292	>500	14	4
IPB	0	0	12.1359	9.70874	12.1359	0	0	0	4.85437	16.1812	1.21359	0.24271	0	0	17.5566	0	0	4.53074	6.79612	8.89968	2.42718	9.97843	5.2589	5.2589	0	3.03398	0	3.23625	1.48328	0.47195	0.46521	0	0	9.81661	4.04531	0	3.07443	3.0205	412	300-500	6	4
OSTEO	0	1.56702	4.50016	7.07168	4.09836	0	8.036	0	0.48216	2.57152	0.12054	0.19286	0	0	12.6005	0	1.52684	11.0897	3.60013	0	1.48666	4.39301	2.46437	2.49116	0	4.28587	0	0.96432	4.50016	0.16072	0.19286	0	0	6.00021	0	0.45537	6.60024	1.20004	1037	>500	14	4
OSTEO	5.47945	6.27854	16.4384	13.242	3.65297	0	1.90259	0	7.30594	18.2648	0.0761	0	2.98326	0	7.24505	1.36986	0	18.6301	0	2.43531	3.08219	11.3648	9.48757	2.66362	0	1.14155	0	5.78387	11.1618	0.10147	0.06849	3.69356	0	5.82445	0	0.30441	13.1101	0	1095	>500	6	4
IPB	0	4.29389	11.4504	14.207	1.59033	0	1.32528	0	3.49873	12.7226	0.39758	0.0318	0	0	10.0933	0	0	14.1858	1.78117	0	2.91561	8.48176	8.14603	1.48431	0.07068	1.50198	0	2.12044	7.2095	0.31806	0.0477	0	0	6.53096	0	0	8.69381	1.68222	1572	>500	14	4
OSTEO	2.74348	0.60013	12.3457	11.8884	3.08642	0	0.85733	0.64014	1.02881	9.14495	0.05715	0.01714	0	0	6.40146	0	0	5.78418	3.84088	0.45724	0.45724	5.94422	6.28715	1.25743	0.15241	0.66681	0.64014	0.68587	5.48697	0.04762	0.01143	0.21338	0	1.81375	0	0.0762	2.99497	1.92044	1458	>500	18	4
IPB	0	0.54884	4.75668	10.6111	3.29308	0	0	0	3.29308	23.4175	0.18294	0.02744	0	0	4.09806	0	0	6.40322	9.22064	0	1.00622	5.85437	4.51275	2.01244	0	0.45737	0	3.47603	18.051	0	0.02744	0.3415	0	2.04903	1.46359	0	5.06159	6.65935	911	>500	14	4
IPB	1.74825	0.87412	20.1049	9.10548	10.9266	0	2.18531	0	4.37063	9.32401	0.72843	0.15297	1.6317	0	22.028	0.87412	1.74825	6.06061	0	0	0.5099	7.09013	6.02176	4.662	0.19425	0.97125	0	1.74825	6.41026	0.14568	0.11655	1.90365	0	13.0536	0.87412	0	4.26379	0	1144	>500	6	4
OSTEO	0	1.82704	5.68413	19.8944	1.21803	0	0	0	10.3532	6.49614	0	0.0609	0	0	6.82095	0	0	6.82095	2.27365	0	0.91352	6.63148	9.06753	1.72554	0	0	0	6.49614	4.06009	0.13533	0.05075	0.18947	0	7.38936	0	0.05075	2.46312	1.13683	821	>500	20	4
OSTEO	10.274	4.28082	6.84932	15.839	0	0	2.85388	0	0	2.28311	0	0	0	0	3.19635	0	0	10.1598	1.59817	3.42466	1.49829	4.75647	8.46651	0	0	0.95129	0	0.57077	2.28311	0.02378	0	0	0	2.1309	0	0	4.43303	1.59817	584	>500	14	4
IPB	19.1956	9.82633	4.87508	5.48446	1.37112	0.30469	4.57038	0	0	3.65631	0	0.11425	0	0	12.3705	0	0.30469	0.85313	3.41255	3.961	2.24711	2.84379	2.99614	0.45703	0	1.65042	0	0	1.21877	0.07617	0	0	0	4.26569	0.76173	0.25391	0.56875	1.13752	1094	>500	14	4
IPB	0	5.96613	7.18501	9.04542	2.50192	0	1.28304	0.7185	1.53965	15.9097	0.57736	0.25019	0.7185	0	1.79625	0.76982	0.96227	2.1555	1.437	0	3.3359	5.04662	7.18501	1.47549	0	1.6038	0.7185	1.79625	9.23788	0.04276	0.16679	0.83825	0	1.31725	0.76982	0.70567	1.49688	2.51475	1299	>500	14	4
OSTEO	0	3.36108	10.8835	9.60307	0	0	0.5335	0	2.56082	10.6701	0.02667	0.03201	0	0	6.87153	0	0.6402	7.46906	5.67648	0	2.24072	6.97112	5.90411	0	0	0.97809	0	0.8536	4.97937	0.00889	0.06935	0	0	4.58102	0	0.6402	5.49154	2.78845	1562	>500	14	4
OSTEO	0	0.31328	4.73406	11.8351	0.62656	0	0	0	7.5188	10.0251	0.0348	0.02088	0	0	14.425	1.25313	1.67084	10.3871	1.94932	0	0.20885	3.89864	7.47238	0.13923	0	0.11603	0	3.20245	5.38383	0.0348	0.04177	0	0	9.87654	0	0.55694	7.88081	0.77972	1197	>500	18	4
OSTEO	0	2.56191	19.926	15.4426	7.68574	0	0	0	4.26985	20.4953	0	0.08539	0.79703	0	3.9852	0	0	3.24509	3.9852	0.56931	1.10305	15.2766	8.32622	5.33732	0	0.23721	0	3.13123	12.9045	0.09488	0.07116	0	0	3.321	0	0.07116	2.22981	1.85976	1171	>500	6	4
IPB	1.82815	1.1426	7.31261	12.9494	4.11335	0	1.1426	0	1.82815	6.09385	0.07617	0.0457	0	0	8.10481	0.45703	0	5.42352	2.55941	1.21877	1.59963	7.71887	14.4475	4.26569	0	1.01564	0	2.13285	8.12513	0.38086	0.12949	0	0	6.9673	1.21877	0	5.78915	4.26569	1094	>500	6	4
OSTEO	3.87347	2.58231	7.10136	5.37981	0.96836	0	2.15193	0	1.93673	5.37981	0.05379	0.11297	0	0	0.60253	0	0.32278	2.43168	1.20508	0.43038	1.23736	3.73001	3.8376	0.43038	0	0.98629	0	0.32278	0.9325	0	0.05379	0	0	2.25952	0.10759	0.05379	1.59243	0.20084	1549	>500	14	4
IPB	0	0	16.2122	5.64972	0.73691	0	1.53525	0	0.73691	24.0727	0	0	1.03169	0	9.62908	0	0	5.50233	0	0	0.0614	10.4806	3.90977	0.55268	0	2.2517	0	0.73691	18.0136	0.02046	0.01842	0.80242	0	5.15844	0	0.16375	4.69991	0.22926	1357	>500	20	4
IPB	0	0	12.5196	14.3975	0.93896	0	0	0	9.38967	9.07668	0.46948	0.14084	0	0	7.01095	0	0.62597	2.31612	1.75274	0	0.97809	8.4507	10.9546	0.78247	0	0.78247	0	7.66823	4.9035	0.02608	0.05477	0	0	2.92123	0	0.20865	2.29525	2.48305	1065	>500	20	4
IPB	0	1.19579	8.92857	7.33418	2.8699	0	0.53146	0	4.46429	6.37755	0	0.04783	0	0	3.86905	0	0	2.2534	2.38095	0	0.95663	7.93651	4.87174	1.96641	0.07086	0.44288	0	2.8699	6.661	0.15943	0.05314	0	0	4.6131	0	0	1.62273	1.98413	1568	>500	14	4
IPB	3.7594	0.23496	18.1704	7.36216	0	0	0	0	0	11.2782	0	0.46992	0	0	3.50877	1.8797	0	3.25815	4.38596	1.25313	0.31328	11.2782	4.9081	0.62656	0.20885	0	0	0	7.93651	0	0.14097	0.58479	0	3.80117	1.8797	0.3916	1.5873	1.75439	532	>500	14	4
IPB	0	0	1.99005	0	0	0	0	0	0	0	0	0	0	0	2.78607	0	2.98507	1.39303	5.57214	0	0.74626	10.9453	2.6534	3.73134	0	3.31675	0	1.99005	7.9602	0.33167	0.0995	0	0	15.3234	0.99502	0	3.84743	4.1791	335	300-500	14	4
OSTEO	0	0.9118	4.19982	28.5698	0.82891	0	0	0	0	18.1256	0	0.06631	0	0	4.33245	0	0	12.8205	0	0	0.33156	2.94724	15.4178	0.77365	0	0.1842	0	0.33156	11.3469	0.05526	0.01105	0	0.05526	5.15768	0	0	8.56174	0.41261	1508	>500	6	4
IPB	1.74216	0.97996	9.00116	5.0813	4.57317	0	1.81475	0	0.87108	6.38792	0.14518	0.39198	0	0	4.47154	0.87108	0	6.09756	4.06504	0.29036	0.97996	9.19473	3.87147	3.41173	0	1.08885	0	0.87108	4.45219	0.21777	0.1234	0	0	3.65854	0.58072	0.29036	3.38753	4.47154	1148	>500	14	4
OSTEO	1.33333	1	11.1111	40.1111	3	0	1.11111	0.62222	5.66667	14.6667	0.36111	0.35	0.31111	0.66666	5.28889	0.33333	0.61111	7.2	1.55556	1.77778	0.88888	4.81481	25.9444	1.27778	0	0.74074	0	3.22222	9.25926	0.31481	0.14444	0.31111	0.11111	3.62963	0.11111	0.05555	3.51111	1.14074	1500	>500	20	4
OSTEO	0	1.32802	7.52545	4.31607	8.30013	0	0	0	1.32802	23.019	0	0.0664	1.23949	0	3.71846	0	0	15.8477	0	0	1.21735	7.23034	1.91825	6.41877	0	0	0	0.88534	13.8704	0.03688	0.11066	0.82632	0	4.75136	0	0	5.51867	0.41316	753	>500	6	4
OSTEO	0	1.03306	11.0193	14.922	4.13223	0	0	0	0	7.34619	0	0.27548	7.7135	0	5.14233	0	1.03306	17.4472	10.2847	0	0.45913	5.81573	10.1775	1.37741	0	0.76522	0	1.83655	4.89746	0	0.04591	1.71411	0	1.28558	0	0.57392	6.21365	5.14233	363	300-500	18	4
IPB	0	3.42153	15.2068	8.28771	3.19343	0	1.52068	0	6.38686	8.51582	0	0.04562	0	0	15.3285	0	0.4562	22.6886	1.70316	1.52068	2.0149	12.9765	5.17032	2.73723	0	0.63361	0	3.3455	1.62206	0	0.0152	0.14193	0	11.0706	0.15206	0.07603	15.9165	1.56123	1096	>500	14	4
IPB	1.99203	1.16202	4.86941	6.86144	1.32802	0	0.83001	0	2.65604	2.21337	0.02766	0.0166	0.61974	0	6.19743	0	0.66401	1.10668	0	2.87738	2.1027	8.11569	15.3276	2.65604	0.07377	0.92223	0	3.20938	8.26324	0.30433	0.0664	1.34278	0	9.14121	0.22133	0.62712	1.6674	2.37568	1506	>500	6	4
IPB	0	3.119	8.95713	0.95969	2.87908	0	0.79974	0	5.75816	15.3551	0.15994	0.14395	0	0	4.47857	2.87908	0	12.0282	5.82214	0	1.83941	6.18469	0.95969	2.7991	0	0.66645	0	1.91939	7.25101	0.14661	0.09596	0.14928	0	1.79143	1.27959	0	7.36831	3.58285	1042	>500	14	4
IPB	0	0	2.86369	1.00229	0	0	1.43184	0	0	0	0	0	0	0	0	0	0	2.4055	0	0	2.14777	2.29095	2.14777	1.14548	0	0.71592	0	0	0	0.04772	0.07159	0	0	0	0.8591	0	3.51279	0.53455	582	>500	14	4
IPB	0	4.49102	2.85144	4.5623	3.63559	0.57028	0.71285	0	4.70488	3.70687	0	0.04277	1.1976	0	5.18962	0	0	5.16111	3.99202	0	2.03165	1.80591	2.78015	0.85543	0	0.95047	0	3.84944	2.61382	0	0.02138	1.06454	0	1.86294	0	0	3.49777	2.52828	1169	>500	14	4
OSTEO	0	0	6.30252	5.77731	0	0	0	0	4.20168	0	0	0	3.92157	0	3.92157	0	2.10084	5.88235	1.96078	0	0.43767	6.06909	2.36345	1.22549	0	0	0	5.60224	3.26797	0.07294	0	2.28758	0	2.28758	0	3.20962	3.36134	1.30719	952	>500	14	4
IPB	7.45342	2.79503	10.766	11.8012	1.86335	0.41407	3.10559	0	2.48447	3.31263	0	0	3.47826	0	17.971	0	0	4.09938	3.47826	4.96894	2.74327	7.45342	5.90062	1.24224	0	1.72533	0	1.65631	6.07315	0.25879	0.0207	0	0	6.37681	0	0	1.93237	3.09179	805	>500	14	4
OSTEO	0	0.78545	4.18911	3.74028	0	0	1.12208	0	0	0	0	0	0	0	1.25673	0	0	12.3579	0	0	0.44883	3.6904	1.99481	0	0	0.12467	0	0	1.19689	0	0	0.55854	0	0.13963	0	0	6.07421	0	1114	>500	14	4
OSTEO	2.63678	0.49439	4.61437	6.04263	3.29598	0	1.09866	0	1.31839	6.81169	0	0	0	0.65919	7.69062	0.65919	0.98879	4.52648	3.07625	1.31839	0.60426	3.51571	2.94807	2.08745	0	0.73243	0	0.21973	6.22574	0.14648	0.03295	0.41016	0	4.71691	0.43946	0.31128	3.11287	2.35846	1517	>500	14	4
OSTEO	0	0.90579	24.5572	4.83092	5.43478	0	0	0	3.62319	9.66184	1.76127	0.18115	2.25443	0	28.1804	4.22705	0	8.97746	0	0	0.30193	13.6876	6.27348	3.01932	0	0	0	2.41546	3.75738	0.08387	0.20128	1.87869	0	14.2781	2.01288	0	6.05207	0	828	>500	14	4
OSTEO	1.42857	2.41071	8.57143	8.57143	2.67857	0	0.59523	0	1.42857	6.66667	0	0.03571	0	0	3.66667	0	0.71428	1.42857	0.66666	0.95238	0.95238	4.68254	5.29762	0.83333	0	0.59523	0	1.30952	3.65079	0.01984	0	0.22222	0	1.66667	0.11904	0.47619	1.07937	0	1400	>500	14	4
OSTEO	4.03226	3.02419	20.1613	11.4247	5.37634	11.2007	6.72043	0	0	23.2975	0	0.0672	0	0	5.01792	0	0	5.01792	0	0	1.40009	15.3823	7.8405	2.68817	3.73357	2.05346	0	0	11.4994	0	0.0224	0	0	2.0908	0	0.89605	2.49403	0	744	>500	18	4
IPB	0	0.39808	3.53857	11.8542	1.06157	0	0.88464	0	1.59236	9.908	0	0.05307	0	0	3.9632	0	0	4.4586	0	0	0.66348	3.42062	5.10144	0.53078	0	0.88464	0	4.24628	8.02076	0.02948	0.03538	0	0	2.477	1.41543	0	5.1899	0.66053	942	>500	14	4
OSTEO	0	0.68823	9.17642	29.4219	2.75292	0	1.14705	0	1.03235	12.3882	0	0.12044	0.32117	0	6.10232	0	0.45882	5.66644	0	0	0.17205	7.49407	18.544	2.63822	0	0.47793	0	0.45882	7.79995	0.05735	0.06882	0.42823	0	3.85409	0	0	3.05116	0	1453	>500	6	4
IPB	0	7.8976	14.5243	3.51005	6.17284	0	1.81554	0	0	4.3573	0.09077	0.32679	1.3556	0	10.8448	0.72621	1.93658	5.51924	2.03341	1.93658	4.93222	7.10078	2.62245	4.47833	0	0.50431	0	0.24207	7.10078	0.28241	0.20576	1.12967	0	6.55209	0.24207	0.24207	3.47777	1.3556	1377	>500	14	4
OSTEO	1.43472	1.25538	4.06504	14.8254	1.7934	0	0.5978	0	1.7934	8.84744	0.02989	0.23314	0	0	4.01722	0	0	4.75849	0.66953	0.47824	0.5978	3.82592	10.0829	1.07604	0	0.19926	0	2.15208	4.7824	0.16937	0.07771	0	0	1.11589	0.11956	0	3.7781	0.55794	1394	>500	20	4
IPB	0	0	5.61798	2.80899	2.80899	0	1.87266	0	2.24719	2.99625	0.28089	0.11235	1.04869	0	3.14607	1.1236	0	2.92135	2.09738	0	0.18726	2.74657	1.18602	1.87266	0	0.3121	0	3.37079	2.99625	0.06242	0.06554	1.22347	0	1.39825	2.62172	0	3.99501	1.04869	890	>500	14	4
OSTEO	0.93457	0.70093	6.54206	5.76324	8.64486	0	0	0	5.14019	12.9284	0.27258	0.02336	0.43613	0.70093	11.3396	0	1.24611	11.4953	1.74455	0	0.70093	4.36137	3.946	6.07477	0.10384	0	0	3.11526	8.04777	0.1298	0.03115	0.87227	0.31152	8.14123	0.46728	1.24611	7.03011	2.03531	1070	>500	18	4
IPB	0	0.73152	2.92612	2.07267	7.13241	0	0.91441	0	6.94952	3.4138	0	0.03657	0	0	4.95001	0	0	7.31529	0	0	0.4572	1.54434	1.68658	4.69398	0	0	0	5.97415	1.95074	0	0.06705	0	0	4.09656	0	0	6.54312	0.68276	1367	>500	14	4
IPB	0	3.68809	28.0998	20.2845	1.84405	0	0.87811	0	2.10748	2.80998	0	0	0	0	2.95047	0	2.10748	2.73973	1.96698	0.70249	3.24903	17.3282	13.1718	0.87811	0.11708	1.46353	0	0.70249	2.80998	0.05854	0.03512	0	0	0.32783	0	1.05374	2.31823	0.98349	949	>500	14	4
OSTEO	2.01342	1.59396	10.2908	7.15884	4.19463	0	2.23714	0	2.68456	12.0805	0.11185	0.08389	0.62639	0	13.4676	0.67114	1.28635	4.56376	2.50559	1.78971	1.64989	8.94855	4.7912	2.57271	0.14914	1.02535	0	3.46756	8.12826	0.45674	0	0.31319	0	8.66518	0.67114	1.71514	4.28784	1.77479	1490	>500	14	4
IPB	0	0.08928	5.47619	2.97619	1.07143	0	0.59523	0	0.71428	4.28571	0	0.01785	0	0.17857	2.66667	0	0	6.7619	0	0	0	8.88889	4.72222	2.08333	0.15873	1.98413	0.05555	2.02381	8.09524	0.01984	0.01785	0.22222	0.23809	6	0	0	14.2857	1.11111	1400	>500	6	4
OSTEO	0	2.69784	5.19584	3.19744	1.19904	0	0.9992	1.1191	2.39808	0.79936	0.19984	0	0	0	1.1191	0	0.29976	0.55955	0	0	0.59952	5.59552	2.26485	1.59872	0	0	1.1191	1.9984	5.32907	0.13322	0	0	0	1.49214	0	0.19984	0.42632	0.37303	834	>500	14	4
OSTEO	2.35294	2.13235	13.1372	15.6863	9.11765	0	1.71569	0	1.76471	11.2745	0.58823	0.08823	0.82352	0	7	0.29411	0.19607	3.47059	1.92157	0.98039	0.88235	8.56209	11.2745	5.04902	0	0.57189	0	1.07843	8.23529	0.35947	0.05882	0.54901	0	4.20915	1.17647	0	3.05229	1.92157	1700	>500	14	4
IPB	0.6734	1.17845	11.8968	8.52974	6.06061	0	2.80584	0	1.3468	14.8148	0.02805	0.16835	0	0	5.65657	0	0.22446	2.37935	6.59933	0	1.40292	8.52974	4.80733	3.367	0	1.30939	0	1.0101	9.7269	0.37411	0.1459	0	0	4.03292	0	0.14964	1.43659	4.60905	1485	>500	6	4
OSTEO	1.26823	4.28028	9.08899	3.96322	3.01205	0.21137	1.58529	0	0	5.49567	0.02642	0.14267	0	0	6.51025	0	0	3.1283	1.18368	0.84548	2.19298	9.86402	4.17459	3.32911	0.07045	0.52842	0	0.21137	3.94561	0.18495	0.02113	0	0	4.53745	0	0	4.07243	2.07144	1577	>500	14	4
OSTEO	0	2.39339	8.99333	33.0722	0	0	3.98898	0	5.65709	0.58021	1.19669	0.10879	0	0	10.9661	0	0.87032	4.20656	0	0	1.01538	8.60652	23.1844	0	0	1.93405	0	3.7714	0.67691	0.689	0.03626	0	0	7.17532	0	0.2901	2.77536	0	1149	>500	18	4
OSTEO	0	3.52564	7.26496	8.38675	8.01282	0.21367	1.06838	0	3.84615	4.70085	0.2938	0.80128	0	0	3.58974	0	1.22863	2.52137	0	0	2.5641	4.34473	4.89672	5.18162	0	1.24644	0	1.81624	2.849	0.24038	0.36324	0.19943	0	0.79772	0	0.3027	1.60256	1.39601	1560	>500	14	4
OSTEO	3.31126	4.24255	35.0442	35.872	15.1076	0	4.82892	0	0	3.31126	0.06898	0.28973	0	2.06954	9.65784	0	1.31071	6.56733	4.63576	1.10375	1.65563	16.3723	20.0285	7.38135	0	2.64441	0	0.13796	2.94334	0.12647	0.13796	0.25754	0.68984	5.53716	1.10375	0.68984	2.57542	1.8028	1208	>500	14	4
OSTEO	0	1.25235	14.402	13.5149	0	0	0.78271	0	3.13087	4.17449	0.20872	0.04696	0	0	11.3964	0	0.07827	4.84241	2.33772	0	0.52181	5.63557	8.90559	0.05218	0	1.73937	0	2.08725	3.89619	0.14784	0.06261	0	0	4.77284	0	0	2.72734	1.16886	1597	>500	18	4
OSTEO	1.79211	3.80824	7.76583	2.16547	2.68817	0	0.74671	0	1.79211	6.57109	0	0.0448	0	0	2.92712	0	0.59737	2.68817	2.0908	0.59737	1.0454	7.86539	4.25627	2.24014	0	0.4978	0	1.94146	5.37634	0.22401	0.0224	0	0	0.9757	0	0.69693	3.22581	2.36957	1116	>500	14	4
OSTEO	0	2.51116	8.92857	3.99926	2.51116	0.74404	0	0	1.11607	11.1607	0.0465	0	0	0	3.64583	0	0	6.84524	4.6875	0	1.11607	2.35615	3.22421	2.13914	0.124	0	0	0.74404	10.6647	0.17051	0	0.86805	0	2.60417	0	0	4.92312	4.6875	896	>500	14	4
OSTEO	1.51057	3.77644	13.5952	18.6933	4.3429	0	1.57351	0	3.77644	16.4904	0.03147	0.43429	0	0	16.566	0.75528	5.28701	7.80463	12.6888	0.50352	1.6994	4.27996	7.61581	2.45468	0	0.2098	0	1.76234	11.4971	0.12588	0.14476	0.82242	0	9.39913	0.75528	2.26586	5.05203	7.5193	1324	>500	14	4
IPB	0	3.76506	0	33.6345	3.01205	0	4.1834	0	1.00402	9.37082	0	0	0	0	8.43373	0	0	9.03614	0	0	3.17938	1.5618	26.4949	3.84873	0	4.74119	0	2.00803	7.5859	0.19522	0	0	0	6.55957	0	0	7.56359	2.49888	498	300-500	14	4
IPB	0	3.5014	8.40336	6.53595	4.20168	0	2.33427	0	2.80112	6.53595	1.40056	0	0	0	16.9935	2.80112	0.9337	4.57516	0.65359	0	2.68441	5.75786	3.96825	2.56769	0.31123	0.77808	0	1.86741	4.82415	0.46685	0	0	0	8.7146	0.9337	0	2.70775	1.52505	714	>500	14	4
IPB	1.71086	1.71086	13.6869	19.4611	1.28315	0	2.13858	0	2.5663	6.84346	0.21385	0.12831	0.7984	0	9.18164	0	0.57028	10.2082	4.39122	0	1.2475	10.0751	13.1404	1.71086	0	2.3762	0	2.5663	5.65536	0.1188	0.07128	1.06454	0	8.64937	0	0.19009	6.86247	1.86294	1169	>500	14	4
OSTEO	0	0.52966	2.82486	5.64972	1.05932	0	0	0	0	6.35593	0	0.21186	0	0	0.9887	0	0	0	1.9774	0	2.82486	6.35593	0	3.53107	0	0.58851	0	2.11864	3.76648	0	0.03531	0	0	0	0	0	0.65913	0	472	300-500	14	4
OSTEO	0	0.67724	7.99794	12.3194	5.03096	0	0.96749	0	4.64396	9.28793	0.19349	0.17414	0.36119	0	9.02993	0	0.38699	8.79773	2.88958	0	0.48374	6.36395	7.03044	3.09598	0	0	0	3.74097	8.59993	0.01074	0.10964	1.68559	0	8.66873	0	0.12899	5.20296	1.56519	1292	>500	6	4
IPB	3.34448	2.0903	8.91862	8.87217	3.34448	0.1858	0.46451	0	1.67224	5.66704	0.20903	0	0.26012	0	8.58417	0.55741	0	3.60461	3.64177	1.48644	1.76514	7.74186	8.19088	2.69417	0	0.15483	0	1.39353	5.3264	0.03096	0.00929	0.69367	0	8.06392	0.92902	0	3.40642	3.29493	1794	>500	14	4
OSTEO	0	1.2605	16.2465	6.72269	2.52101	0	1.05042	0	6.72269	7.28291	0	0.42016	0.78431	0	3.52941	0	0.21008	3.92157	4.70588	0.56022	0.59523	11.4846	5.71895	2.52101	0	1.63399	0	4.90196	5.97572	0.04668	0.12605	1.30719	0	2.61438	0	0.53688	2.87582	1.04575	1190	>500	14	4
IPB	3.4904	1.63613	10.7621	16.7248	3.9267	0	2.1815	0	4.363	9.30774	0.07271	0	0.81442	0	4.88656	0	0	1.62885	3.66492	1.7452	1.16347	6.59298	10.7621	3.99942	0	1.81792	0	3.19953	6.68994	0.03635	0.01454	1.22164	0	3.66492	0.8726	0	1.35738	2.57902	1146	>500	14	4
IPB	0	3.07105	18.8136	19.1456	2.32404	0	0.27667	0	1.32802	19.4776	0.19366	0	0.61974	0	10.2258	1.66003	0	7.59185	3.09872	0	1.99203	13.5753	9.72038	1.99203	0	0.46111	0	2.98805	7.23034	0.20289	0.01106	0.41316	0	6.55895	1.43869	0	4.75136	1.34278	1506	>500	14	4
OSTEO	0	1.25	14.6667	9.91667	0	0	6.25	0	9	9.33333	0.58333	0.1	1.4	0	3.26667	0	1.25	12.7333	5.6	0.33333	0.70833	8.55556	3.61111	0.83333	0.22222	4.72222	0	6.33333	4.44444	0.16666	0.05	0.62222	0	3.11111	0	0.83333	10.2556	4.66667	1000	>500	18	4
IPB	0	0.41876	6.97934	2.65215	1.0469	0	0	0	2.93132	4.1876	0	0.04187	0	0	0.78168	2.93132	0	2.17755	3.90843	0.27917	0.80262	12.6559	5.67653	1.95422	0	0.93057	0	4.60637	4.74595	0.05816	0.04187	0	0	5.60208	4.32719	0	1.80532	3.77815	1194	>500	6	4
IPB	0	3.45816	14.17	9.10931	6.24157	0.22492	4.21727	0.94466	0	4.49843	0	0.03373	0	0	11.336	1.68691	2.02429	7.21997	1.88934	0	1.46199	9.29675	4.34848	1.06838	0.14994	2.90523	1.57445	0.67476	2.39916	0.07497	0.07872	0	0	8.18713	0.89968	0.44984	4.61089	1.25956	1482	>500	14	4
OSTEO	0	0.92336	9.84918	13.5426	5.30933	0	2.69314	0	1.84672	8.61804	0	0.04616	3.44721	0	4.73992	0	0.5771	19.5753	11.6343	0	1.19267	7.48948	12.1319	4.46291	0	2.05191	0	2.4623	7.1817	0.06412	0.01538	3.01631	0	4.88355	0	0.26931	10.8649	8.76167	1083	>500	18	4
IPB	4.63576	4.71854	17.2185	13.1898	0.49668	0	1.10375	0	2.64901	3.97351	0.66225	0.34768	0	0	3.09051	0	0.24834	14.8124	1.8543	2.20751	2.78698	11.479	9.08756	0.71743	0	2.57542	0	3.09051	4.81972	0.11037	0.22626	0	0	3.09051	0	0.16556	7.29213	1.64827	1510	>500	14	4
OSTEO	0	2.4858	9.4697	12.0739	2.13068	0	0	0	0	6.1553	0	0.14204	0	0	1.32576	0	0	3.97727	0	0.94696	1.30208	6.94444	7.2601	0.23674	0	0.39457	0	0	1.26263	0.15782	0.04734	0.44191	0	5.30303	0	0.47348	3.25126	0.88383	704	>500	14	4
IPB	1.27307	1.59134	11.2455	6.78973	4.45576	0	1.0609	1.1882	5.0923	18.6718	0.31826	0.31826	0	0	6.53512	0.31826	0.15913	5.30448	2.97051	0.84871	0.79567	7.42627	3.87227	3.18269	0	1.0609	0.5941	1.90961	8.20426	0.21217	0.32357	0.19803	0	6.53512	0	0	3.62119	2.37641	1571	>500	14	4
IPB	4.17362	2.19115	10.8514	19.4769	3.75626	0.55648	2.08681	0	1.66945	8.90373	0.27824	0.35475	4.67446	0	20.256	0	0	5.84307	3.1163	2.78242	1.11297	5.10109	8.41681	2.22593	0.18549	1.15934	0	1.80857	11.1297	0.46373	0.11825	2.59692	0	10.7772	0	0.10434	4.59098	3.76554	1198	>500	14	4
IPB	0	1.64474	5.11696	4.29459	4.93421	0	0	0	2.74123	12.4269	0.04568	0.10964	0	0	3.07018	0	0	11.5132	1.53509	0.73099	1.0508	7.79727	1.82749	5.48246	0	0.30458	0	0.36549	12.6706	0.04568	0.08223	1.02339	0	4.77583	0.18274	0.36549	7.52924	2.55848	912	>500	14	4
IPB	0	1.83284	2.93255	0.48875	0	0	1.2219	0	0	0.97751	0.36656	0.07331	0	0	8.89541	0	0	0.78201	0	0	0.73313	2.60671	0.61094	0.36656	0	0.81459	0	1.2219	0.97751	0	0.07331	0	0	6.38645	0	0	0.55392	0.91234	682	>500	18	4
IPB	0	2.70898	8.77193	9.54592	4.64396	0	0.64499	0	1.93498	2.06398	0.09674	0	0	0	3.61197	0	0	5.23736	0	0	0.77399	4.98796	5.39646	3.28947	0	0.64499	0	2.19298	3.22497	0	0	0	0	3.00998	0	0	4.09357	0	1292	>500	6	4
OSTEO	0	0.22831	20.7002	30.2131	2.28311	0	0.38051	0	8.6758	8.82801	0.60882	0	0.42617	0	9.37595	0	0	6.45358	2.1309	0	0.0761	13.4957	20.3957	0.91324	0	0	0	8.98021	8.11771	0.44393	0.00761	0.14205	0	9.7311	0	0	4.04871	1.84678	1095	>500	20	4
OSTEO	0.67888	2.12152	13.804	6.61914	2.03666	0	3.11156	0	4.75221	5.88368	0.28286	0.10183	0	0	7.60353	0	0.67888	0.18103	3.16814	0.67888	1.27291	10.2587	4.07332	1.41435	0	2.35725	0	3.05499	2.41382	0.18857	0.05091	0	0	3.16814	0.45259	0.22629	0.12069	1.90088	1473	>500	14	4
IPB	8.87762	6.65821	12.4709	5.91841	3.17058	0	1.05686	0	7.60938	5.91841	0.02642	0.25364	0.59184	0	6.51025	0	0	15.3879	2.95921	2.53646	3.06489	8.38441	2.99443	1.69097	0.07045	1.58529	0	2.95921	4.22744	0.10568	0.26949	0	0	3.94561	0	0.21137	8.27168	4.43881	1577	>500	14	4
IPB	3.4153	1.70765	5.23679	24.2486	10.2459	0	0	0	0.68306	18.4426	0.02846	0.13661	0	0	2.86885	0.68306	0	11.2022	3.18761	2.50455	0.91074	5.46448	17.6647	3.9276	0	0	0	1.59381	10.4736	0.02846	0.09107	0	0	3.40012	1.13843	0	8.43959	2.23133	1464	>500	6	4
OSTEO	0	0.45454	4.84848	7.12121	5.45455	0.60606	5.30303	0	0	0	0	0	0	0	1.69697	0	0	1.69697	0	0	0.37878	3.63636	5.60606	2.72727	0.40404	1.51515	0	0	0	0.02525	0	0	0	1.69697	0	0	0.98989	0	550	>500	18	4
OSTEO	0	2.082	8.96861	3.57677	2.56246	0	1.06769	0	2.56246	13.2394	0.05338	0.06406	0	0	23.3184	0.64061	0	11.104	0	0	0.90753	8.32799	2.56246	1.49477	0	1.51256	0	2.02861	7.6162	0.02669	0.03203	0	0	14.6986	0.64061	0	8.5273	0	1561	>500	14	4
OSTEO	0	0	0	0	0	0	0	0	0	0	0	0	0	0	0	0	0	0	0	0	0	0	0	0	0	0	0	0	0	0	0	0	0	0	0	0	0	0	805	>500	14	4
IPB	0.63775	3.18878	12.7551	7.44048	0.31887	0.21258	0.79719	0	0.63775	10.2041	0.02657	0	0	0	12.7976	3.18878	0	6.29252	0	1.27551	1.14264	12.4008	4.37571	0.15943	0.21258	0	0	0.31887	0.85034	0.15058	0.01062	0	0	8.23413	2.33844	0	2.8699	0.0992	1568	>500	6	4
IPB	5.24476	0.43706	8.74126	11.655	1.31119	0	1.8211	1.6317	6.99301	6.99301	0	0.17482	0	0	10.6061	0	0	5.47786	5.71096	2.03963	0.14568	6.99301	8.27991	0.58275	0.19425	0.84984	0.5439	3.64219	6.60451	0.02428	0.11655	0	0	6.79876	0	0	4.17638	2.1756	1144	>500	18	4
OSTEO	3.96432	1.98216	13.2144	32.5405	5.94648	0.33036	1.6518	0	7.92864	18.1698	1.15626	0.0991	0.4625	0	10.1751	0	0.24777	7.30096	4.62504	1.32144	1.15626	2.86312	7.32298	2.14734	0	0.8259	0	4.9554	8.36912	0.06882	0	0	0	3.70003	0	0.5506	2.15835	0.61667	1009	>500	20	4
IPB	1.34953	0.67476	3.37382	17.2065	4.38596	0	0.84345	0	2.69906	11.6959	0.36549	0.06747	0	0	8.81691	0	1.01215	3.35133	0	0.44984	0.84345	3.29885	11.1524	2.69906	0	0.18743	0	1.12461	8.54701	0.24366	0	0.10496	0	6.92758	0	0.44984	2.05428	0	1482	>500	18	4
IPB	0	1.79856	13.3607	12.1617	5.65262	0	0	0	4.62487	3.42583	0.25693	0	0	0	7.67386	0	3.21172	5.82391	1.91847	0	1.67009	9.82071	8.67877	3.68277	0	0	0	2.91196	5.25294	0.09992	0.01712	0	0	5.7554	0	1.27041	4.77332	0.95923	973	>500	14	4
OSTEO	0	2.21519	20.6751	15.981	4.27215	0	0	0	2.21519	9.70464	0	0.12658	1.47679	0	7.97468	0	0	7.42616	2.36287	0	0.84388	9.91561	9.82771	2.21519	0	0	0	2.1097	5.62588	0.01758	0.06329	0.98452	0	1.27989	0.21097	0	2.83404	1.08298	1580	>500	18	4
IPB	2.95858	2.58876	8.87574	20.7101	1.47929	0	3.08185	0	2.21893	12.8205	0	0.07396	0	0	5.52268	0	2.21893	4.48718	0	1.47929	1.1711	3.28731	12.2247	0.30818	0	2.97913	0	0.49309	10.0263	0.0719	0.02465	0	0	2.64629	0	0.98619	2.70381	0.11505	1352	>500	14	4
IPB	2.53165	1.26582	6.54008	14.346	1.42405	0	1.58228	0	1.89873	6.75105	0.34282	0.07911	0.59071	0	1.18143	0	0	3.92405	0.59071	2.53165	1.52954	11.1814	22.9606	2.53165	0	0.43952	0	3.90295	8.57947	0.1758	0.03164	0.78762	0	5.11955	0	0.05274	8.39662	2.95359	1580	>500	6	4
IPB	0	0.42925	14.4231	19.6314	6.18132	0	1.71703	0.96153	5.1511	9.15751	0.1717	0.46359	0	0	13.4615	0	0.68681	4.3956	2.88462	0	0.22893	10.6838	10.3785	4.29258	0	1.0493	0.53418	5.49451	9.00488	0.08585	0.12019	0.32051	0	8.01282	0.3434	0.22893	4.94505	1.06838	1456	>500	6	4
IPB	0	0	3.15956	8.29384	5.92417	0	0	0	0	0	0	0.05924	0	0	4.42338	0	0	0	0	0	0	2.63296	3.8178	4.73934	0.52659	0	0	0	1.05319	0.06582	0	0	0	2.21169	0	0	0	0	422	300-500	14	4
OSTEO	1.33333	1.83333	9.33333	4.61111	4.33333	0.22222	0.55555	0	3.33333	7.11111	0.19444	0.55	0	0	8.4	0.66666	0.5	5.6	4.97778	1.33333	1.66667	6.66667	4.24074	2	0.07407	0.83333	0	2.55556	5.18519	0.16666	0.35	0	0	6.42963	0.66666	0.42592	4.34074	3.73333	1500	>500	14	4
IPB	4.05405	3.88514	19.5946	11.4865	0	0	1.68919	0	3.37838	6.75676	0	0.03378	1.89189	0	4.41441	0	0	1.26126	2.52252	3.15315	1.63288	10.4354	6.92568	0	0	1.21997	0	5.29279	5.33033	0.01876	0.02815	1.89189	0	3.04805	0	0	0.1051	2.83784	1480	>500	20	4
IPB	0	2.24775	10.656	17.982	0	0.666	0.41625	0	5.49451	14.985	0.20812	0	1.3986	0	3.7296	0	1.332	3.7296	4.1958	1.332	1.998	7.10401	10.4618	0.333	0	1.11	0	3.663	7.65901	0.36075	0.01665	0.9324	0	3.5742	0	0.444	2.331	3.4188	1001	>500	14	4
IPB	0	1.68464	8.98473	24.708	5.16622	0	0.74872	0	1.79695	7.18778	0.07487	0.06738	0	0	7.12788	0	0	11.8299	1.67715	0	1.27284	4.79185	13.5769	3.44414	0	0	0	0.89847	5.79016	0.09983	0.07487	0	0	3.77358	0	0	8.25596	1.1181	1113	>500	6	4
IPB	0	3.20307	9.39569	8.00769	4.164	0	0.53384	0	0	10.6769	0	0.06406	1.19581	0	3.58744	0	1.28123	0.85415	3.58744	0	1.60154	6.97559	7.54502	2.34892	0	0	0	0	7.82974	0.01779	0.06406	0.69755	0	2.98954	0	1.06769	0.68332	3.98605	1561	>500	14	4
OSTEO	0	0.41946	3.3557	22.3714	0	0	3.49553	0	5.03356	4.47427	0	0.08389	0	0	3.13199	0	0	1.566	2.34899	0	0.41946	5.03356	16.9183	0	0	1.16518	0	0	2.23714	0.34955	0.05592	0	0	0.78299	0	0	0	2.34899	596	>500	18	4
IPB	1.43988	1.07991	16.7987	14.3389	2.15983	0	1.49988	0	1.79986	7.91937	0	0.14398	0	0	12.095	0	0	4.07967	1.34389	0	0.77993	12.239	8.17935	1.43988	0	0.79993	0	1.91985	4.11967	0.09999	0.07799	0.11199	0.11999	5.48756	0.47996	0.38996	3.95168	2.12783	1389	>500	6	4
OSTEO	3.84369	2.56246	10.6769	17.5635	0	0	2.13538	0	1.60154	7.68738	0	0.20819	0	0	0.5979	0	0	12.8764	0.89686	2.34892	1.49477	6.19261	13.0258	0.64061	0	0.97871	0	1.49477	5.26728	0.02669	0.04804	0	0	0.89686	0	0	8.01481	0.99651	1561	>500	6	4
IPB	0	8.10285	8.06684	29.0262	2.80899	0	3.60127	0	2.16076	4.03342	0	0	0	0	3.63008	0	0.21607	4.95534	2.01671	0.2881	5.58196	4.89772	15.2934	1.87266	0	1.20042	0	1.58456	1.53654	0.07202	0	0	0	3.22674	0	0.07202	4.32152	0.80668	1157	>500	6	4
IPB	1.28783	2.57566	3.00494	14.5954	0.32195	0	4.29277	0	1.93175	9.01481	0.48293	0.61171	1.20197	0	10.8178	0	0	9.18652	8.41382	0	1.93175	4.86514	10.4815	1.07319	0	0.89432	0	1.39515	6.29606	0.26829	0.34342	1.60263	0	5.30872	0.42927	0.31301	4.48594	5.00823	1553	>500	14	4
OSTEO	0	1.7845	15.6356	26.7392	8.83753	0	3.11579	0	5.09857	13.143	0	0.01699	0	0	2.8552	0	0	3.71629	0.63448	0.4532	0.99138	8.76199	14.0116	4.58872	0	2.36045	0	2.15273	9.6684	0	0.04532	0	0	1.58622	0	0.02832	2.0772	0.63448	1471	>500	18	4
OSTEO	2.54939	0.87635	6.58594	10.41	2.86807	0	1.32781	0	7.01083	9.34778	0.15933	0.0956	0	0	4.75887	0.95602	0	4.37646	0	1.91205	0.55768	3.75328	7.52425	2.23072	0	0	0.09914	5.20501	6.79839	0.12392	0.05311	0	0	3.37087	0.31867	0	3.0097	0	1569	>500	20	4
IPB	0	1.62734	10.8489	3.25468	0	0	1.35612	0	0	3.25468	0.0678	0.16273	0	0	20.1248	0	0	0	0	0	1.28831	9.76404	2.3732	0	0	0.67805	0	0.27122	2.89305	0.0113	0.14917	0.50628	0	10.5054	0.40683	0.18081	0.12657	0	1229	>500	14	4
IPB	7.70713	2.56904	13.0593	6.69022	1.92678	0	0	0	5.45922	6.85078	0.05352	0.19267	0.59944	0	14.9861	0	0	11.946	1.19889	4.06765	1.92678	8.27803	2.99722	0.53521	0	1.42725	0.0999	4.28174	5.70898	0.03568	0.1445	1.09898	0.05352	7.84272	0	0	7.28609	2.29787	1557	>500	18	4
OSTEO	1.30976	2.37394	4.80244	3.82013	2.61952	0	0.54573	0	0	6.98537	0.32743	0.03274	0	0	9.1683	2.61952	0.76402	2.92513	6.41781	1.30976	1.69177	2.91057	3.43811	2.01921	0	0.63668	0	1.20061	5.0935	0.07276	0	1.32431	0	5.90846	1.30976	0.36382	1.86277	3.87106	1527	>500	14	4
OSTEO	0	0.79719	7.22789	6.64328	1.91327	0	0	0	2.23214	3.82653	0	0.04783	0	0.63775	1.33929	0	0	6.54762	0	0	0.82376	4.60601	2.58645	1.27551	0	0	0	0.63775	2.01956	0.03543	0	0	0.05314	0.99206	0	0	4.13124	0	1568	>500	18	4
OSTEO	2.84293	0.71073	12.7932	2.60602	4.97512	0	1.18455	0	1.42146	8.52878	0.41459	0.21321	0	0	0	0	0.47382	3.67212	1.65837	1.42146	0.59227	6.79144	1.75709	4.14594	0	0.69098	0	0.71073	7.97599	0.23691	0.1066	0.33167	0	0.66334	0.35536	0	1.38198	2.6534	1407	>500	14	4
IPB	1.28617	0.72347	20.3644	2.46517	0.64308	0	0	0	5.46624	6.21651	0.05359	0.03215	1.20043	0	15.6056	1.28617	1.07181	3.4298	1.80064	0.42872	0.10718	2.50089	0.64308	0.10718	0	0	0	0	0.9289	0	0.01071	0.20007	0	3.00107	0	0.1429	0.05001	0.20007	1555	>500	14	4
IPB	0	0.72568	3.87034	14.7557	0	0	0	0	2.90276	11.611	0.12094	0.07256	0	0	5.41848	1.45138	0	8.22448	0	0	0.84663	3.70908	9.2727	0	0	0.20158	0	0.96758	6.45057	0.22173	0.02418	0.45154	0	0.90308	0.96758	0	4.28963	0	689	>500	20	4
OSTEO	6.00801	3.00401	8.67824	13.518	5.00668	0	1.39074	0	1.66889	4.89542	0.02781	0.08344	0	0	8.41121	0	2.75367	2.49221	0.62305	0.66755	2.36426	7.4173	8.49281	2.55897	0	1.01988	0	1.55763	3.41196	0.07417	0.02225	0	0	3.63448	0	0.80663	1.37962	0.62305	1498	>500	18	4
OSTEO	0	2.17865	10.8933	15.4321	5.99129	0.3631	1.81554	0	1.08932	10.5301	0.09077	0.16339	0	0.54466	15.7589	0	0.3631	14.1612	7.11692	0.72621	0.81699	5.80973	13.3745	1.08932	0.24207	1.51295	0	3.08642	3.99419	0.33284	0.07262	1.0167	0	8.64198	0	0	5.08351	6.10022	918	>500	14	4
IPB	1.66945	1.04341	4.45186	3.54758	1.46077	0	0	0	0.41736	2.78242	0	0.0626	0	0	8.95938	0	0	7.01169	0	1.39121	0.97384	3.52439	2.78242	1.25209	0	0.11593	0	0.83472	3.57077	0.01159	0.18085	0.12984	0	6.75199	0	0	6.16769	0	1198	>500	6	4
OSTEO	2.43161	3.34347	17.6292	16.8693	2.43161	0	3.29281	0	0	6.68693	0.15197	0.09118	0	0	6.24113	0	0	3.30294	1.70213	1.21581	2.20365	8.84836	7.98717	1.41844	0	1.18203	0	0.20263	3.78251	0	0.05572	0	0	2.55319	0	0	1.49274	1.22931	1645	>500	18	4
OSTEO	0.63371	0.31685	0.63371	10.245	0.95057	0	1.58428	0	0	5.06971	0.10561	0.25348	0	0	1.18293	0	0.31685	21.3984	1.7744	0.63371	0.10561	0.63371	8.85439	0.63371	0	0.70412	0	0	3.02774	0.07041	0.06337	0	0	1.67582	0	0.26404	14.329	0.98577	1578	>500	6	4
OSTEO	1.34318	2.43452	9.62615	13.096	6.04433	0.44772	3.35796	1.88046	6.38012	14.1034	0.78352	0.41974	0.3134	0	13.79	0	0	6.82785	1.56705	0.44772	1.11932	4.99963	8.56279	3.63779	0.14924	2.33192	1.0447	4.92501	6.93978	0.19588	0.13991	0.83575	0	7.83524	0.11193	0	3.61167	1.25364	1489	>500	20	4
OSTEO	0	0	4.96454	9.21986	3.19149	0	0	0	0	9.92908	0.1773	0.10638	0.9929	0	11.9149	0	0	4.96454	0	0	0	6.61939	3.4279	3.5461	0	0	0.66193	0	3.30969	0.0591	0.03546	0	0	6.95035	0	0.47281	5.0591	1.32388	470	300-500	18	4
OSTEO	0	1.6635	7.60456	18.2193	1.26743	0	0.52809	0	0	2.11238	0	0.01584	0	0	0.29573	0	0	14.5754	2.07013	0.42247	1.79552	5.28095	10.1218	0.68652	0.28165	0	0	0.21123	3.80228	0.10561	0.02112	0	0	0.19715	0.21123	0	8.73821	1.38009	1578	>500	14	4
OSTEO	0	0	0	2.55102	0	0	0	0	0	0	0	0	0	0	0	0	0	0	0	0	0	0	0.85034	0	0	0	0	0	0	0	0	0	0	0	0	0	0	0	196	<300	14	4
IPB	0	0	3.37041	13.0603	0	0.67408	2.1065	0	4.55005	5.72969	0.67408	0.15166	0	0	4.71857	0	0	0.80889	0.94371	0.33704	0.8426	2.58398	7.44298	0.33704	0.22469	0.8426	0	3.20189	2.58398	0.37917	0.05898	0.15728	0	3.61757	0	0	1.89866	1.73014	989	>500	18	4
IPB	0	0.5468	3.49956	9.25926	1.31234	0	5.10353	0	0	13.1234	0.0729	0.08748	0	0	17.5561	0	0	4.95771	1.63313	0	0.25517	4.95771	5.92981	1.31234	0	3.03781	0	1.16652	13.415	0	0.02916	0	0	7.62127	0	0	2.8677	0.81656	1143	>500	14	4
IPB	1.26984	16.6667	14.8148	3.28042	1.5873	0.21164	6.34921	0	1.90476	5.07937	0.291	0.50793	0	0	6.51852	0	1.0582	4.59259	2.37037	0.84656	9.39153	9.87654	3.24515	1.74603	0	3.1746	0	1.90476	2.68078	0.08818	0.38624	0	0	3.35802	0	0.56437	3.65432	1.08642	1575	>500	14	4
OSTEO	0	1.52749	7.46775	3.9036	5.43109	0	3.6773	0	0.67888	9.27812	0.05657	0.13577	0	0	1.90088	0	1.0749	6.33628	0.63362	0.22629	0.99004	3.84702	2.48925	2.65897	0	1.69722	0	1.47092	4.82764	0.07543	0.04525	0	0	2.53451	0	0.77317	4.11858	0.52802	1473	>500	14	4
IPB	0	0	4.06504	15.4044	3.04878	0	0	0	1.60462	3.85109	0	0.25673	0.59905	0	5.092	0	0.32092	3.3804	3.89388	0	0.16046	4.92084	12.1238	2.03252	0	0.17829	0	1.60462	3.70846	0.10697	0.21929	0.59905	0.21394	4.69263	0.64184	0.21394	3.41606	5.69106	1558	>500	6	4
OSTEO	1.91939	4.31862	12.7959	21.1666	1.91939	0	3.46556	0	12.7959	15.7816	0.1866	0.06397	0	0	16.4214	0	0	3.135	2.38857	2.34592	2.87908	9.95237	16.2792	1.06633	0	1.59949	0	9.27703	9.66802	0.25769	0.03732	0	0	10.7486	0	0.21326	1.53551	1.19428	1563	>500	20	4
IPB	4.58716	2.29358	19.1132	24.4648	6.30734	0	1.43349	0	6.30734	23.7003	0.95565	0.34403	0	0	7.49235	0	0	11.9266	14.4495	0	1.72018	12.4873	12.3598	3.6315	0	0.6371	0	3.0581	13.2518	0.28669	0.1529	0	0	4.81651	0	0.25484	4.63812	6.60041	872	>500	6	4
IPB	2.69542	1.51617	10.5571	1.51617	4.54852	0.67385	0.56154	0	8.76011	13.0279	0.22461	0.06738	0	0	18.239	0	0	2.4708	5.66038	0.44923	1.12309	5.09134	1.38515	1.34771	0.07487	0.37436	0	4.49236	4.9416	0.23397	0.02246	0	0	7.96646	0.67385	0	1.60228	2.51572	1484	>500	14	4
OSTEO	0	3.003	31.5315	72.0721	15.015	0	0	0	1.5015	16.016	0.06256	0.56306	0	0	18.9189	0	2.87788	12.6126	1.4014	0	1.43894	23.1899	40.7074	11.8869	0	0	0	6.25626	6.58992	0.08341	0.35035	0	0	13.0798	0.75075	1.77261	8.75876	2.1021	666	>500	18	4
IPB	0	0	5.6798	15.2645	0	0	0	0	1.06496	1.41995	0	0.21299	0	0	1.98793	0	0	1.13596	0	0.35498	0.26624	7.45474	18.5481	0.70997	0	0.59164	0	0.35498	5.91646	0.19228	0.43485	0.33132	0	2.48491	0	0.04437	4.94616	1.65661	939	>500	6	4
OSTEO	4.08163	0	12.9252	15.6463	1.02041	0	0	0	4.08163	2.72109	0.34013	0.2551	0	0	8.57143	0	0	0	5.71429	1.36054	0.85034	4.08163	10.771	2.38095	0	0	0	4.08163	4.53515	0.14172	0.06802	0	0	5.71429	0	0	3.69615	1.90476	490	300-500	20	4
IPB	1.43164	0.3579	13.8392	5.01074	6.97924	0	0	0	3.93701	9.54426	0	0.03579	0	0	2.00429	0.3579	0	10.1169	0.66809	0	0.17895	10.0215	3.67852	3.51945	0	0.19883	0	3.22119	9.70333	0.07953	0	0	0	0.66809	0.71581	0	5.64702	0.89079	1397	>500	6	4
OSTEO	0	0	0	0	0	0	0	0	0	0	0	0	0	0	0	0	0	0	0	0	0	0	0	0	0	0	0	0	0	0	0	0	0	0	0	0	0	0	1234	>500	14	4
IPB	0.69589	3.04454	10.4384	3.53746	2.08768	0	2.6096	0	0	7.8868	1.04384	0.19137	0	0	7.30689	0.34794	0	2.59801	3.24751	0	2.26166	7.65484	2.59027	2.08768	0	1.44978	0	0	7.11359	0.23196	0.13917	0	0	2.81451	1.15982	0	2.35831	2.27325	1437	>500	14	4
IPB	3.19693	11.8286	18.9685	6.55371	0	0	1.33205	0	8.63171	8.95141	0.15984	0.33567	0	0	5.07246	0	0.42625	12.8943	5.37084	3.62319	7.13981	14.2086	4.22705	0.10656	0.07104	0.71042	0	1.59847	5.9676	0.10656	0.2078	0	0	5.17192	0	0.07104	7.43819	3.87894	1564	>500	14	4
IPB	0	0.97427	9.61289	22.0187	8.57366	0	1.94856	0	0.77942	17.6669	0.38971	0.15588	0	0	17.8228	0	0.77942	9.14523	0	0	0.77942	3.2043	14.4843	2.46817	0	1.51555	0	0	3.63731	0.18403	0.18836	0.36373	0	10.8513	0	0.32475	20.3776	0	1283	>500	6	4
OSTEO	0	1.36333	9.99773	6.4758	1.36333	0	0.85207	0.63621	2.04499	8.40718	0.53965	0.06816	0	0	2.54488	0.68166	1.13611	1.43149	1.90866	0	2.72665	7.04385	4.60123	2.55624	0	2.74559	0.10603	2.84026	4.77164	0.01893	0.03408	0.21207	0	3.81731	0.68166	0.51124	3.58252	1.37847	1467	>500	14	4
OSTEO	0	0	0	0	0	0	0	0	0	0	0	0	0	0	0	0	0	3.33333	0	0	0	11.1111	0	8.33333	0	0	0	0	0	0	0	0	0	0	0	0	0	0	20	<300	14	4
IPB	0	2.11149	17.7928	26.3514	2.7027	0	1.68919	0	3.04054	9.00901	0.9009	0.23648	1.26126	0	10.7207	0.67567	0	6.44144	5.36036	0	1.35135	14.7898	15.6907	1.91441	0.07507	0.93843	0	3.37838	6.45646	0.44106	0.12387	0.21021	0	5.99099	1.57658	0	5.2027	3.36336	1480	>500	14	4
OSTEO	0	5.20833	15.625	12.5868	3.90625	2.60417	4.34028	0	10.4167	6.94444	0	0	2.43056	0	18.2292	0	8.68056	2.08333	2.43056	0	1.84462	6.94444	6.00405	2.60417	0.5787	3.97859	0	7.8125	4.34028	0.1085	0.0434	0	0	10.1273	0	2.89352	0.98379	3.24074	384	300-500	14	4
OSTEO	6.88231	3.69924	19.7293	9.17642	6.02202	0	5.73526	8.18995	6.88231	10.897	0.68823	0.06882	0.64234	0	29.7086	0	0.63087	7.8229	5.45997	3.21175	3.21175	13.4587	6.28967	3.21175	0	0.7647	4.54997	2.40881	8.02936	0.3919	0.01147	2.03411	0	21.144	0	0.15294	6.06408	3.53292	1453	>500	14	4
OSTEO	0	3.47222	12.963	12.037	6.94444	0	5.78704	0	13.8889	27.7778	0.63657	0.06944	0	0	9.07407	0	5.09259	8.7037	5.83333	0.92592	2.02546	12.037	9.64506	6.48148	0	2.89352	0	9.49074	20.9876	0.90663	0.13888	0.21604	0	7.23765	0	3.27932	6.35802	2.59259	720	>500	14	4
OSTEO	0	2.25952	8.6077	7.42414	12.9116	0.64557	1.34495	0	1.29116	9.68367	1.02216	0.06455	0.60253	0	3.31397	0	1.45255	4.99247	2.10889	0.43038	1.47945	5.37981	5.46948	7.10136	0.14346	0.26899	0	0.86077	5.73847	0.66351	0	0.50211	0	4.51904	0	0.64557	3.70131	2.41016	1549	>500	14	4
IPB	0	1.57431	24.7691	11.9647	0	0	0	0	4.40806	6.29723	0	0.18891	1.17548	0	18.8077	0	0	2.35097	5.28967	0	0.94458	8.67618	7.94151	0	0	0.34984	0	7.13686	5.17772	0.29736	0.06297	0.19591	0	14.8895	0	0	2.37895	3.91828	794	>500	14	4
[truncated: 105 more rows]

## Sheet: I year
attender	Topic	dda12aa20	dda11cc04	ddg04ca02	ddc02ca04	ddg04cb01	dda11cc01	dda12aa04	ddg03xc01	ddg04cb02	ddg04ca01	dda11cc05	dda11cc06	ddm05bx03	dda11cc02	ddm05ba04	ddm05ba06	dda11cc03	ddg04ca03	ddm05ba07	assisted population	district code	local health authority code	dddA11CC01_1anno	dddA11CC02_1anno	dddA11CC03_1anno	dddA11CC04_1anno	dddA11CC05_1anno	dddA11CC06_1anno	dddA12AA04_1anno	dddA12AA20_1anno	dddC02CA04_1anno	dddC08CA12_1anno	dddG03XC01_1anno	dddG04CA01_1anno	dddG04CA02_1anno	dddG04CA03_1anno	dddG04CB01_1anno	dddG04CB02_1anno	dddJ01MA17_1anno	dddM05BA04_1anno	dddM05BA06_1anno	dddM05BA07_1anno	dddM05BB03_1anno	dddM05BX03_1anno
[truncated: 1,722 more rows]

[truncated: 3 more sheets: II year, IV year, codes]
